# Supplementary material for: Definition of the Neurotoxicity-Associated Metabolic Signature Triggered by Berberine and Other Respiratory Chain Inhibitors
Source: Antioxidants (Basel). 2023 Dec 28;13(1):49. doi: 10.3390/antiox13010049 (PMC10812665; doi:10.3390/antiox13010049)
Supplement: Supplementary file 1 [file antioxidants-13-00049-s001.zip › Berberine OMICS - Suppl. Table S1.xlsx]

## Sheet: Table of Contents
	Supplementary Table 1. Omics statistical results
	Table of contents
	Current sheet	Method	Link to spreadsheet	Exposure time (h)	Concentrations
	Sheet 1	Transcriptomics time series	Berberine time course	4, 16, 24	94 µM
	Sheet 2		Carbaryl time course	4, 16, 24	64 µM
	Sheet 3		Colchicine time course	4, 16, 24	40 nM
	Sheet 4		Diethylstilbestrol time course	4, 16, 24	21 µM
	Sheet 5		MPP+ time course	4, 16, 24	10 µM
	Sheet 6		Rotenone time course	4, 16, 24	4.4 µM
	Sheet 7		Valinomycin time course	4, 16, 24	17 nM
	Sheet 8	Transcriptomics concentration series	Berberine titration	24	0.2 - 94 µM
	Sheet 9		Carbaryl titration	24	0.9 - 120 µM
	Sheet 10		Colchicine titration	24	0.1 - 80 nM
	Sheet 11		Diethylstilbestrol titration	24	0.1 - 21 µM (42 µM was cytotoxic)
	Sheet 12		MPP+ titration	24	0.02 - 10 µM
	Sheet 13		Rotenone titration	24	0.02 - 9 µM
	Sheet 14		Valinomycin titration	24	0.1 - 33 nM
	Sheet 15	Metabolomics	Metabolomics: Ber, MPP, Rot	24	12.5 µM Ber, 10 µM MPP, 0.5 µM Rot
	A. In the transcriptomics time series experiments, the exposure times are indicated in the column labeled "statistic.compound_time."
	B. In the transcriptomics experiments involving titration, the concentrations are indicated in micromolar (µM) in the column labeled "statistic.compound_concentration."
	C. In the metabolomics experiment, cells were exposed each of the complex-I inhibitors at a fixed concentration (see table above) for a fixed time (24h).
	A and B. Transcriptomics statistical results of each treatment (vs. the DMSO control condition) for 3257 unique genes measured with the TempO-Seq probe panel EuTox V2.1.
				Parameters
			deseq2 (R) differential gene expression analysis	baseMean	average gene CPM measurements across all samples
				log2FC	log2 fold change of gene expression in treatment relative to control condition
				lfcSE	standard error of the log2 fold change estimate
				pval	Wald test p-value
				FDR	p-value corrected for multiple testing using the Benjamini-Hochberg algorithm
	C. Metabolomics statistical results of each treatment (vs. DMSO control condition)
	* indicates a compound that has not been confirmed based on a standard, but Metabolon is confident in its identity.

## Sheet: 1. Ber_time
Probe_ID	baseMean	log2FC.Ber_4h	lfcSE.Ber_4h	stat.Ber_4h	pval.Ber_4h	FDR.Ber_4h	log2FC.Ber_16h	lfcSE.Ber_16h	stat.Ber_16h	pval.Ber_16h	FDR.Ber_16h	log2FC.Ber_24h	lfcSE.Ber_24h	stat.Ber_24h	pval.Ber_24h	FDR.Ber_24h
A2M	0.252668	0	9.22474	0	1		-1.08949	9.21431	-0.118239	0.905879		-1.62681	9.0107	-0.180542	0.856727
AARS	743.244	-0.603453	0.355814	-1.69598	0.0898892	0.594355	-0.170563	0.355122	-0.480294	0.631018	0.845188	0.18568	0.346952	0.535173	0.59253	0.911269
AASDHPPT	138.992	-0.0722796	0.34513	-0.209427	0.834115	0.968652	0.161004	0.34723	0.463681	0.642877	0.849662	-0.171326	0.34914	-0.490709	0.623632	0.921883
AATF	180.234	0.161394	0.184416	0.875164	0.381484	0.838369	-0.0215614	0.183285	-0.117639	0.906354	0.966486	0.341811	0.179167	1.90778	0.0564197	0.449552
ABCA1	25.5982	-1.5391	0.554312	-2.77659	0.0054932	0.157998	-0.88007	0.524546	-1.67778	0.0933908	0.37051	-0.247565	0.510016	-0.485406	0.627388	0.923354
ABCA6	3.13764	0.146354	1.07748	0.135829	0.891956	0.979283	1.98568	0.918916	2.16089	0.0307038	0.209321	1.79957	0.852511	2.11091	0.0347803	0.345948
ABCA8	0.0429157	0	9.22474	0	1		-0.769695	9.21431	-0.0835326	0.933428		-0.688499	9.01264	-0.0763926	0.939107
ABCB1	2.44043	0.316847	0.910781	0.347885	0.727926	0.939507	0.229139	1.02486	0.22358	0.823084	0.942276	0.700752	0.874485	0.801331	0.42294	0.8617
ABCB10	12.8613	-0.348742	0.581603	-0.599622	0.548758	0.887876	-0.693575	0.601472	-1.15313	0.248857	0.568245	0.650526	0.622649	1.04477	0.296129	0.803317
ABCB11	0.208398	-2.02356	9.22112	-0.219448	0.826301		-0.768982	9.21431	-0.0834552	0.93349		-0.426196	9.01264	-0.0472886	0.962283
ABCB6	29.7559	0.111429	0.398213	0.279823	0.779613	0.951119	0.235101	0.396583	0.592816	0.553304	0.80338	-0.053365	0.41223	-0.129455	0.896998	0.983757
ABCC1	143.674	0.381602	0.19576	1.94934	0.0512554	0.500307	0.285037	0.193477	1.47323	0.140688	0.448205	0.356801	0.191969	1.85864	0.0630785	0.476233
ABCC2	9.64831	1.69177	0.581134	2.91115	0.00360096	0.127474	-0.186645	0.577917	-0.322962	0.746724	0.902799	1.46548	0.56294	2.60326	0.00923426	0.164018
ABCC3	1.43764	0.694252	1.56433	0.443801	0.657186	0.920126	-1.77195	1.93656	-0.914997	0.360193	0.672042	-2.46982	1.85325	-1.3327	0.182632
ABCC4	342.229	0.218657	0.17643	1.23934	0.215219	0.753514	0.170788	0.175857	0.971175	0.331461	0.645006	0.423745	0.172032	2.46317	0.0137715	0.213258
ABCC5	1257.95	-0.658082	0.342598	-1.92086	0.0547492	0.505936	-0.688595	0.342428	-2.01092	0.0443338	0.248495	-0.0880468	0.334427	-0.263277	0.792337	0.967932
ABCF1	266.191	0.116669	0.146876	0.794336	0.427	0.852379	0.296529	0.144219	2.0561	0.0397729	0.239526	0.719085	0.142189	5.05724	4.25361e-07	3.80783e-05
ABCF3	59.3196	-0.070621	0.510232	-0.138409	0.889917	0.979283	-0.458175	0.507341	-0.903091	0.366478	0.672859	0.0262999	0.492851	0.0533628	0.957443	0.992334
ABCG1	1.31829	-0.993426	1.59162	-0.62416	0.532523	0.885388	-2.93847	1.83385	-1.60235	0.109078	0.395124	-2.477	1.80839	-1.36972	0.170773
ABCG2	0.255074	0	9.22474	0	1		1.97547	9.17765	0.215247	0.829574		1.82309	8.9724	0.203189	0.838988
ABHD4	5.43869	-0.0174645	0.576406	-0.0302989	0.975829	0.998359	0.32602	0.568403	0.573571	0.566258	0.809461	0.18731	0.628587	0.297986	0.765714	0.957892
ABHD6	340.05	-0.0644105	0.368689	-0.174701	0.861314	0.973049	-0.726344	0.369177	-1.96747	0.049129	0.259774	-0.334245	0.360292	-0.927705	0.353561	0.83535
ABL1	10.5456	-0.468668	0.571441	-0.820151	0.41213	0.847302	0.321456	0.553875	0.580377	0.561661	0.808121	0.67329	0.531378	1.26706	0.205132	0.708929
ACAA1	102.397	0.0402945	0.294097	0.137011	0.891022	0.979283	1.33655	0.287232	4.6532	3.2682e-06	0.000184463	0.812996	0.2817	2.88603	0.0039013	0.0992171
ACADL	1.90512	-0.082149	1.29238	-0.0635642	0.949317	0.993614	0.162959	1.37978	0.118105	0.905985	0.966486	-0.417304	1.41981	-0.293915	0.768823	0.959571
ACADM	137.96	0.27879	0.426255	0.654045	0.513083	0.87502	0.398682	0.427834	0.931862	0.351408	0.666465	-0.0725854	0.421271	-0.172301	0.863201	0.983757
ACADVL	457.984	-0.36016	0.313182	-1.15	0.250144	0.785171	-0.45939	0.312648	-1.46935	0.141738	0.450848	-0.016035	0.305135	-0.0525506	0.95809	0.992334
ACAT1	83.914	0.230506	0.256394	0.899029	0.368637	0.838369	0.547233	0.260094	2.10398	0.0353801	0.232605	0.305963	0.265397	1.15285	0.248972	0.767987
ACAT2	117.109	-0.085216	0.448419	-0.190037	0.849281	0.971042	0.00236678	0.450701	0.00525132	0.99581	0.997454	-0.143506	0.445171	-0.322361	0.747179	0.954587
ACBD3	70.2628	0.270577	0.202427	1.33667	0.181332	0.713237	-0.00439095	0.206462	-0.0212676	0.983032	0.992025	-0.0758549	0.208707	-0.363452	0.716267	0.946919
ACD	68.0522	-0.182359	0.257416	-0.708422	0.478683	0.871661	-0.319355	0.257739	-1.23906	0.215322	0.537561	0.0802216	0.256781	0.312413	0.754727	0.955361
ACE	2.46022	-1.53971	1.34956	-1.1409	0.253913	0.786208	0.590239	1.1727	0.503316	0.614742	0.836311	0.164744	1.12377	0.146599	0.883449	0.983757
ACE2	0.302888	-0.888837	5.40241	-0.164526	0.869317		-1.41733	5.40011	-0.262463	0.792965		-0.505516	5.27651	-0.095805	0.923675
ACHE	6.53956	-0.340984	0.832678	-0.409503	0.682171	0.923986	-1.80442	0.898166	-2.009	0.0445371	0.249059	-0.982191	0.884416	-1.11055	0.266761	0.77639
ACLY	171.625	0.426809	0.492092	0.867335	0.385759	0.838369	0.153414	0.493797	0.310682	0.756042	0.906164	0.283753	0.484591	0.585552	0.558177	0.894275
ACMSD	0.0961642	0	9.22474	0	1		0	9.21431	0	1		-0.688499	9.01264	-0.0763926	0.939107
ACOT9	1.24907	-0.284428	1.3586	-0.209354	0.834172	0.968652	2.31775	1.40365	1.65123	0.0986918	0.377322	0.557426	1.39291	0.400187	0.689019
ACOX1	42.243	0.340163	0.281665	1.20769	0.227167	0.77289	0.237891	0.283022	0.840539	0.400606	0.697418	0.799711	0.286654	2.78981	0.00527389	0.122948
ACP1	147.777	-0.229649	0.159033	-1.44403	0.14873	0.677112	-0.139539	0.160662	-0.868524	0.385108	0.687371	-0.0942946	0.16351	-0.576689	0.56415	0.895898
ACPP	0.0661973	0	9.22474	0	1		0	9.21431	0	1		-0.688499	9.01264	-0.0763926	0.939107
ACSL1	22.0647	0.484058	0.525609	0.920947	0.357078	0.835504	0.534503	0.529015	1.01037	0.312316	0.629357	0.391272	0.52583	0.744103	0.456814	0.866778
ACSL5	0.123027	0	9.22474	0	1		-0.769371	9.21431	-0.0834974	0.933456		-0.426196	9.01264	-0.0472886	0.962283
ACTA1	3.46867	0.225018	0.892699	0.252064	0.800991	0.959758	1.44721	0.965239	1.49933	0.133788	0.440575	-2.5738	1.29715	-1.98419	0.047235	0.408154
ACTA2	189.604	-0.429579	0.287514	-1.49412	0.135145	0.663441	0.19772	0.285451	0.692657	0.488525	0.765666	-0.141455	0.280624	-0.504072	0.614211	0.920182
ACTG2	3.72009	-0.550713	1.05615	-0.521435	0.602064	0.899725	-1.27176	1.12356	-1.1319	0.257677	0.574746	-2.62559	1.41361	-1.85737	0.0632587	0.476233
ACTL6A	627.339	-0.0363755	0.363056	-0.100193	0.920191	0.985736	0.0423372	0.363514	0.116467	0.907283	0.966646	-0.405066	0.356787	-1.13531	0.256244	0.775308
ACTN1	789.908	0.00993327	0.339869	0.0292268	0.976684	0.998359	-0.490266	0.339774	-1.44292	0.149043	0.4608	0.0461132	0.331867	0.138951	0.889489	0.983757
ACTN2	8.85973	0.13161	0.620165	0.212218	0.831937	0.968652	-0.624366	0.612762	-1.01894	0.308232	0.62811	-0.655264	0.640444	-1.02314	0.306242	0.811089
ADAM10	1506.42	-0.0411966	0.172027	-0.239478	0.810735	0.963088	-0.1816	0.171714	-1.05758	0.290248	0.605703	0.121147	0.167385	0.723766	0.46921	0.866778
ADAM12	33.1717	-0.251227	0.365634	-0.6871	0.49202	0.872575	-1.25631	0.376321	-3.33841	0.000842603	0.0180973	-0.247925	0.346374	-0.715773	0.474131	0.866778
ADAM8	23.148	1.16766	0.854622	1.36629	0.171847	0.703944	-2.33733	0.890578	-2.62451	0.00867739	0.0954551	-0.485788	0.847288	-0.573345	0.566411	0.895898
ADAMTS5	1.41466	-2.03912	1.76888	-1.15278	0.249003	0.785171	-1.47598	1.68181	-0.877612	0.380154	0.684842	0.00802685	1.46776	0.00546877	0.995637
ADAT1	6.69005	-1.22048	0.698002	-1.74853	0.0803719	0.579736	-0.240416	0.659145	-0.364738	0.715307	0.888914	1.24292	0.677224	1.83532	0.0664577	0.480577
ADCK3	154.217	-0.223642	0.410923	-0.544245	0.586273	0.897045	0.282643	0.409846	0.689633	0.490425	0.767416	0.0520528	0.402738	0.129247	0.897162	0.983757
ADCY1	8.09008	0.616357	0.576779	1.06862	0.285241	0.807644	-0.0492761	0.523331	-0.0941585	0.924983	0.974109	0.516045	0.553697	0.931999	0.351337	0.83382
ADCY4	0.376892	-1.20942	5.42992	-0.222732	0.823744		-0.129151	5.42779	-0.0237945	0.981017		-2.61396	5.28756	-0.494361	0.621051
ADGRE5	2.60992	-0.520787	1.14014	-0.456776	0.647832	0.91675	-0.682129	1.10279	-0.618546	0.536216	0.795434	-1.56679	1.26342	-1.24012	0.214932	0.717936
ADGRG1	37.0632	0.165037	0.304478	0.542031	0.587797	0.897207	-0.0884222	0.309284	-0.285894	0.77496	0.915461	0.262888	0.314497	0.835901	0.40321	0.861054
ADGRG3	0.348677	-0.742247	7.61991	-0.0974089	0.922402		0	7.61601	0	1		-0.958065	7.44653	-0.128659	0.897627
ADH1A	0.527324	-1.19097	4.52404	-0.263253	0.792356		-0.769935	4.53209	-0.169885	0.8651		-2.39075	4.41174	-0.541906	0.587883
ADH1B	0.329523	3.14062	6.66971	0.470878	0.637728		1.08129	6.67737	0.161934	0.871358		0	6.59614	0	1
ADH5	200.25	0.400305	0.512229	0.781497	0.43451	0.853589	0.631459	0.513522	1.22966	0.218824	0.539935	-0.295725	0.506306	-0.584083	0.559164	0.894275
ADI1	58.056	0.344828	0.500489	0.688981	0.490835	0.872575	0.23803	0.50287	0.473344	0.635968	0.846214	0.165043	0.50831	0.32469	0.745416	0.954371
ADIPOQ	0.909949	-0.63062	3.01783	-0.208965	0.834476		-1.4166	3.02087	-0.468936	0.639115	0.847618	2.52492	2.79581	0.903107	0.366469
ADIRF	0.933332	1.32408	2.52706	0.52396	0.600307		-1.22643	2.63802	-0.464905	0.641999	0.849662	0.0759312	2.47035	0.0307371	0.975479
ADM	2.51685	-0.377563	1.3306	-0.283754	0.776599	0.951119	2.22174	1.28526	1.72863	0.0838748	0.35341	-0.265407	1.34668	-0.197082	0.843763	0.978366
ADO	112.527	0.830434	0.406864	2.04106	0.0412448	0.449784	0.829273	0.407518	2.03493	0.0418575	0.243796	0.0902596	0.404574	0.223098	0.823459	0.973301
ADORA2A	7.63964	1.16073	0.611473	1.89825	0.0576632	0.510903	-0.181434	0.645101	-0.281248	0.77852	0.915884	-0.581665	0.677336	-0.858754	0.390476	0.853224
ADRB2	0.735275	-0.685925	3.25292	-0.210864	0.832993		-0.846919	3.38518	-0.250185	0.802445		-0.426182	3.31162	-0.128693	0.897601
ADSL	12.2886	0.114772	0.596447	0.192427	0.847408	0.971042	-0.310917	0.607045	-0.512181	0.608524	0.83541	-0.0584845	0.624923	-0.0935867	0.925437	0.986595
AEN	51.9765	1.38614	0.338533	4.09454	4.23009e-05	0.00540747	1.57834	0.333791	4.72855	2.26133e-06	0.000130673	0.699737	0.343746	2.03562	0.0417883	0.38371
AFP	0.278111	0	9.22474	0	1		0	9.21431	0	1		-0.95814	9.01254	-0.106312	0.915335
AGL	47.6774	0.46005	0.416678	1.10409	0.269555	0.797127	0.811805	0.417192	1.94588	0.0516692	0.266865	0.118264	0.416266	0.284106	0.776329	0.960328
AGR2	0
AGR3	0.191715	-0.888822	9.22474	-0.096352	0.923241		-0.769134	9.21431	-0.0834717	0.933476		-1.24614	9.01221	-0.138272	0.890025
AGXT2	0.564857	-2.16862	5.42078	-0.400057	0.689114		-0.129058	5.42655	-0.0237826	0.981026		-2.0282	5.28215	-0.383973	0.700998
AHCY	371.641	0.0614107	0.250596	0.245058	0.806411	0.961033	0.814557	0.250452	3.25235	0.00114454	0.0222223	0.574775	0.245831	2.33809	0.0193827	0.245478
AHR	0.220512	0	9.22474	0	1		0	9.21431	0	1		-0.501925	9.01168	-0.0556972	0.955583
AHRR	5.16682	1.15361	0.66724	1.72894	0.0838207	0.584459	-1.264	0.770337	-1.64084	0.100831	0.381327	0.280555	0.661445	0.424155	0.671453	0.929135
AHSA1	645.839	0.151227	0.137619	1.09888	0.271821	0.799821	0.402987	0.137003	2.94146	0.00326672	0.0469132	0.265635	0.135556	1.9596	0.0500426	0.419458
AHSP	1.58648	-0.979654	1.70477	-0.574653	0.565526	0.895958	2.76301	1.68494	1.63982	0.101042	0.381327	-0.26123	1.68224	-0.155287	0.876595	0.983757
AIF1	2.61126	-2.05224	1.24853	-1.64373	0.100233	0.60503	-3.04142	1.57261	-1.934	0.0531133	0.270765	-0.953766	1.23792	-0.770461	0.441026	0.8617
AIFM1	114.654	0.350985	0.390945	0.897785	0.3693	0.838369	0.0699995	0.391857	0.178635	0.858224	0.955889	-0.0747528	0.387105	-0.193107	0.846875	0.97898
AIFM2	7.50237	0.683036	0.714285	0.956252	0.338945	0.828812	0.540736	0.676363	0.799477	0.424014	0.718849	0.207496	0.678198	0.305951	0.759642	0.956578
AK3	21.5694	-0.459248	0.428487	-1.07179	0.283814	0.806714	0.506615	0.416691	1.2158	0.22406	0.542889	-0.313735	0.44616	-0.70319	0.481937	0.86913
AKAP8	554.028	0.244422	0.247346	0.988177	0.323066	0.825573	-0.13779	0.246996	-0.557864	0.576937	0.816769	0.416627	0.240745	1.73058	0.0835271	0.519364
AKAP8L	31.941	0.347732	0.348983	0.996415	0.319049	0.824432	0.167807	0.357497	0.469393	0.638789	0.847618	-0.137559	0.375344	-0.366489	0.714001	0.946919
AKR1B1	4.45067	-0.757388	0.658784	-1.14968	0.250277	0.785171	-0.758347	0.767265	-0.988376	0.322969	0.640396	0.0775294	0.735016	0.10548	0.915995	0.986595
AKR1B10	53.9128	-0.937445	0.438099	-2.1398	0.0323709	0.404812	-0.104187	0.439917	-0.236832	0.812787	0.935612	-0.276619	0.432623	-0.6394	0.522563	0.882156
AKR1C2	0.277355	-0.888822	9.22474	-0.096352	0.923241		-1.98785	9.21181	-0.215794	0.829148		1.23771	8.99089	0.137663	0.890507
AKR1C3	6.71902	0.209759	0.652506	0.321467	0.747857	0.946306	0.574242	0.665403	0.862998	0.388139	0.689109	0.204642	0.70793	0.289071	0.772527	0.959571
AKR7A2	972.166	-1.00456	0.545498	-1.84155	0.0655417	0.529245	-1.88401	0.546051	-3.45024	0.000560093	0.0137308	-1.0071	0.532867	-1.88996	0.0587637	0.463074
AKT1	5384.13	-0.567339	0.29155	-1.94594	0.051662	0.500307	-0.778134	0.291553	-2.66893	0.00760943	0.0871136	0.140623	0.28473	0.493884	0.621388	0.920663
ALAS1	645.185	0.695372	0.116559	5.96584	2.43376e-09	1.86669e-06	0.627281	0.116036	5.4059	6.44821e-08	5.39649e-06	0.937692	0.114009	8.22469	1.95699e-16	1.45992e-13
ALAS2	0.353384	-2.19328	9.21997	-0.237883	0.811972		-1.08927	9.21431	-0.118215	0.905897		2.32068	8.95753	0.259075	0.795577
ALB	0.417071	-2.03196	4.50582	-0.450964	0.652016		1.07346	4.49194	0.238975	0.811125		0	4.42529	0	1
ALDH1L1	0.0565445	0.393505	9.22474	0.0426576	0.965974		0	9.21431	0	1		0.53554	9.01264	0.059421	0.952617
ALDH2	590.5	-0.394302	0.351566	-1.12156	0.262051	0.79235	-1.06896	0.352017	-3.03666	0.00239212	0.038446	-0.251469	0.343194	-0.732732	0.463722	0.866778
ALDH3A1	0.197481	-1.88284	9.22207	-0.204166	0.838223		-0.769244	9.21431	-0.0834837	0.933467		-1.24614	9.01221	-0.138272	0.890025
ALDH3A2	32.2303	0.352089	0.45956	0.766143	0.443591	0.856969	0.269664	0.460673	0.585369	0.558299	0.807505	0.488838	0.47163	1.03649	0.299975	0.807308
ALDH7A1	50.0975	-0.236425	0.301147	-0.785079	0.432407	0.853589	-0.121323	0.297013	-0.408478	0.682923	0.870066	0.564967	0.290219	1.94669	0.0515716	0.426111
ALDH8A1	3.38703	0.144725	1.05432	0.137268	0.890819	0.979283	0.00629198	1.06692	0.00589732	0.995295	0.997349	0.60194	0.998541	0.60282	0.546628	0.892012
ALDH9A1	422.236	-0.646294	0.157634	-4.09997	4.13207e-05	0.00540747	-0.7086	0.157481	-4.49959	6.80855e-06	0.000351582	-0.0127008	0.151653	-0.0837486	0.933256	0.987531
ALDOA	2559.12	-0.132391	0.167112	-0.792229	0.428227	0.852379	0.182753	0.166736	1.09606	0.273052	0.584904	0.575164	0.162768	3.53364	0.000409885	0.0176408
ALDOC	10.6233	-0.380286	0.546401	-0.695983	0.486439	0.872575	0.085798	0.541371	0.158483	0.874076	0.959902	0.569614	0.536996	1.06074	0.288808	0.796
ALG8	72.7384	0.732161	0.528353	1.38574	0.165825	0.695368	0.812916	0.529414	1.5355	0.124661	0.423974	-0.222012	0.524603	-0.4232	0.672149	0.929135
ALPP	0.327059	-2.93238	9.21383	-0.318259	0.750289		-0.129191	9.21431	-0.0140207	0.988813		-1.24609	9.01221	-0.138267	0.890029
AMACR	0.826027	-0.964488	3.00839	-0.320599	0.748514		-0.21667	2.98773	-0.0725199	0.942188	0.979166	-0.426171	3.11301	-0.1369	0.89111
AMDHD2	195.151	-0.890301	0.482155	-1.8465	0.0648192	0.528897	-0.982513	0.482361	-2.03688	0.0416617	0.243796	-0.241996	0.469744	-0.515165	0.606438	0.915794
AMER1	627.601	-0.574499	0.738894	-0.777512	0.436857	0.853589	-1.51378	0.739235	-2.04776	0.0405831	0.242599	-0.492955	0.721724	-0.683024	0.494591	0.872509
AMH	1.35285	-1.27272	2.24977	-0.56571	0.571591	0.895958	-3.55337	2.42292	-1.46657	0.142494	0.45193	-2.65145	2.3901	-1.10935	0.267281
AMHR2	1.92366	-3.04226	1.84526	-1.64869	0.0992115	0.60503	-2.76104	1.85145	-1.49128	0.135887	0.444098	1.02323	1.42646	0.717321	0.473176	0.866778
AMIGO1	1.54636	-0.494477	1.38492	-0.357044	0.721059	0.937078	1.20764	1.32783	0.909488	0.363093	0.672102	-0.603725	1.29737	-0.465344	0.641685	0.923447
AMIGO2	0.321459	-1.60888	9.2235	-0.174432	0.861526		1.65478	9.17766	0.180306	0.856913		-1.24603	9.01221	-0.13826	0.890035
AMPD3	1.9527	-1.62441	1.37875	-1.17817	0.238728	0.774735	-1.07712	1.10282	-0.976702	0.328717	0.644423	-0.0596744	1.07946	-0.0552816	0.955914	0.992334
AMY1A	3.06379	1.26305	0.809043	1.56116	0.118485	0.63685	0.722186	0.871592	0.828583	0.407341	0.701146	0.314111	0.80945	0.388055	0.697975	0.941293
AMY2A	25.0841	-0.0993494	0.403753	-0.246065	0.805632	0.960995	-0.725256	0.437	-1.65962	0.0969902	0.377322	-0.422913	0.411475	-1.0278	0.304045	0.808236
AMY2B	21.3008	0.296401	0.608264	0.487289	0.626053	0.911547	-0.345636	0.625276	-0.552774	0.580419	0.818137	0.0695892	0.617239	0.112743	0.910235	0.985568
AMZ2	57.9215	0.29833	0.580881	0.513581	0.607545	0.901039	0.083896	0.586034	0.143159	0.886165	0.964449	0.300269	0.579731	0.517945	0.604496	0.915794
ANGPTL2	13.4319	0.231061	0.424408	0.544431	0.586145	0.897045	-0.0132154	0.424527	-0.0311297	0.975166	0.989021	0.66099	0.430554	1.53521	0.124733	0.60128
ANGPTL4	0.923325	-0.277672	1.967	-0.141165	0.88774		-0.638834	2.0638	-0.309542	0.756909	0.906722	-2.22303	2.13698	-1.04027	0.298214
ANK1	1.578	-1.87183	1.99861	-0.936567	0.348981	0.829551	-4.09777	2.10596	-1.94579	0.0516796	0.266865	0.423854	1.81753	0.233203	0.815604	0.973301
ANKRD10	1910.41	0.402829	0.133862	3.00928	0.0026187	0.101204	-0.153656	0.134024	-1.14648	0.251596	0.568552	0.269529	0.131006	2.05738	0.0396499	0.376002
ANKRD20A13P	433.181	-0.458832	0.428246	-1.07142	0.28398	0.806714	-0.404674	0.427463	-0.946688	0.343798	0.658858	-0.00340176	0.416964	-0.0081584	0.993491	0.998038
ANKRD26	25.0566	0.150652	0.358164	0.420622	0.674031	0.922077	-0.0746786	0.361289	-0.2067	0.836244	0.944375	0.584607	0.342256	1.7081	0.0876178	0.53177
ANKRD30A	0.233743	0	9.22474	0	1		1.60747	9.17103	0.175277	0.860862		-0.958024	9.01254	-0.106299	0.915345
ANKRD36B	22.4607	0.318604	0.468227	0.680448	0.496221	0.872575	-0.208528	0.481422	-0.43315	0.664906	0.8597	0.207377	0.457484	0.453298	0.650334	0.927037
ANKRD36BP2	1.21578	-0.797312	2.60608	-0.305943	0.759648	0.948823	-3.1753	2.75679	-1.15181	0.249398	0.568245	-2.84749	2.70151	-1.05404	0.291866
ANLN	68.7632	0.404439	0.359843	1.12393	0.261042	0.791857	0.745906	0.358382	2.08131	0.0374052	0.236914	1.04402	0.350508	2.9786	0.00289567	0.0810062
ANO10	135.997	-0.19865	0.366691	-0.541736	0.588	0.897207	-0.984528	0.368317	-2.67305	0.00751651	0.0864577	-0.39502	0.358801	-1.10095	0.27092	0.77639
ANP32E	1354.1	-0.0857778	0.121694	-0.704866	0.480894	0.871661	-0.151501	0.121554	-1.24637	0.21263	0.53477	0.319717	0.118927	2.68835	0.00718063	0.144777
ANXA1	0.274937	0	9.22474	0	1		0	9.21431	0	1		1.76232	8.99089	0.196011	0.844601
ANXA2	109.834	0.0879841	0.267956	0.328353	0.742645	0.944401	-0.52125	0.272415	-1.91344	0.0556912	0.277104	-0.172761	0.268514	-0.643396	0.519967	0.881581
ANXA2P2	34.0005	0.407021	0.47679	0.85367	0.393288	0.838369	-0.0745497	0.4863	-0.1533	0.878162	0.96153	-0.436009	0.492881	-0.884614	0.376365	0.849392
ANXA5	221.539	0.28835	0.444583	0.648584	0.516607	0.87668	0.219309	0.445331	0.492464	0.622392	0.839658	-0.244381	0.438344	-0.557511	0.577178	0.900157
ANXA7	63.2896	0.116817	0.355572	0.328534	0.742508	0.944401	0.481419	0.354397	1.35842	0.174332	0.49027	0.553682	0.351093	1.57702	0.114791	0.584934
ANXA8	0.73532	-0.413191	3.14179	-0.131515	0.895368		2.69251	3.05379	0.881695	0.377942		-2.44445	3.13964	-0.778578	0.436229
ANXA8L1	13.0894	-0.7939	0.534548	-1.48518	0.137496	0.663815	-0.202413	0.516301	-0.392044	0.695026	0.877186	-0.077555	0.482458	-0.16075	0.87229	0.983757
AOAH	0.370369	-0.888841	3.90291	-0.227738	0.81985		-2.60804	3.87949	-0.672262	0.501417		-1.76345	3.80643	-0.463281	0.643163
AP1M2	0.653605	2.17275	3.17474	0.684386	0.493732		1.26801	3.14428	0.403275	0.686746		1.33109	3.15939	0.421313	0.673527
AP2B1	8.64433	-0.746794	0.520077	-1.43593	0.151023	0.677112	0.521913	0.504405	1.03471	0.300804	0.617118	0.0226792	0.551597	0.0411155	0.967204	0.993077
AP2M1	46.4164	-0.564752	0.58098	-0.972069	0.331016	0.825573	-0.508781	0.581955	-0.874262	0.381976	0.686351	-0.517561	0.568052	-0.911115	0.362235	0.840954
AP3M1	1621.54	0.15438	0.104429	1.47833	0.13932	0.665094	-0.0229672	0.104318	-0.220166	0.825742	0.943735	0.315169	0.102263	3.08196	0.0020564	0.0648201
APBA1	4.15454	0.562978	0.942363	0.597411	0.550233	0.888482	-1.07317	0.965151	-1.11192	0.266171	0.581456	-2.75998	1.29636	-2.12903	0.0332521	0.335335
APBB2	19.3392	-0.799253	0.489925	-1.63138	0.10281	0.60503	-0.111154	0.46787	-0.237574	0.812212	0.935612	0.480468	0.466881	1.0291	0.303432	0.808236
APEX1	720.868	0.158134	0.218894	0.722423	0.470035	0.871661	0.350707	0.218868	1.60237	0.109073	0.395124	0.238314	0.214852	1.1092	0.267342	0.77639
APLN	0.339657	-2.74121	9.21583	-0.297446	0.766126		-1.66186	9.21347	-0.180372	0.85686		-1.09646	9.00738	-0.121729	0.903114
APLP1	630.228	-0.442168	0.526448	-0.839908	0.40096	0.841312	-1.63827	0.527175	-3.10764	0.00188589	0.0324613	-0.804406	0.514698	-1.56287	0.118084	0.587882
APOA1	0.955797	0.868626	2.34342	0.370666	0.710886		-1.74591	2.61352	-0.668032	0.504113	0.778792	-1.87723	2.54448	-0.737766	0.460657
APOBEC3G	0.0839017	0	9.22474	0	1		0	9.21431	0	1		-1.19063	9.01227	-0.132112	0.894896
APOC1	1.60858	-0.282805	1.37423	-0.205791	0.836954	0.968652	0.177734	1.31859	0.134791	0.892777	0.964745	0.946141	1.29141	0.732641	0.463778	0.866778
APOE	1.68495	0.0885187	1.16592	0.075922	0.939481	0.992143	-2.11934	1.43519	-1.47669	0.139759	0.448205	-0.218821	1.22355	-0.178841	0.858062	0.983757
APOL3	0.334561	0	6.01828	0	1		-1.41721	6.0152	-0.235604	0.81374		-0.534243	5.87816	-0.0908861	0.927583
APP	1124.6	0.219452	0.165485	1.32611	0.184802	0.716467	-0.00520769	0.165132	-0.0315365	0.974842	0.989021	0.223386	0.161437	1.38373	0.16644	0.660049
APPBP2	464.775	0.459993	0.189194	2.43133	0.0150436	0.295858	0.190951	0.189272	1.00887	0.313035	0.629357	0.45205	0.186095	2.42913	0.015135	0.217131
APTX	176.692	-0.0700744	0.281066	-0.249316	0.803116	0.959758	0.100942	0.280832	0.35944	0.719266	0.890775	0.24008	0.277274	0.865859	0.386568	0.852262
AQP1	2.25352	1.03874	1.40774	0.737879	0.460588	0.869346	-1.3926	1.42338	-0.97838	0.327887	0.643836	-0.661211	1.45351	-0.454905	0.649177	0.925978
AQP3	0.391587	-1.6041	4.96216	-0.323267	0.746493		-1.40614	4.96266	-0.283344	0.776913		-0.531602	4.84823	-0.109649	0.912688
AQP4	0.196898	-0.507539	9.16753	-0.0553626	0.95585		1.18736	9.20434	0.129	0.897358		0	9.01264	0	1
AQP9	0.171179	0	9.22474	0	1		-2.46662	9.20638	-0.267925	0.788757		-0.426196	9.01264	-0.0472886	0.962283
AR	35.3628	-0.735455	0.643796	-1.14237	0.253299	0.786208	-1.53694	0.649817	-2.36519	0.0180208	0.154002	-0.171742	0.624845	-0.274856	0.783427	0.96299
AREG	0.311087	-1.92468	7.70507	-0.249794	0.802746		-1.82367	7.70972	-0.236541	0.813013		-0.688498	7.54013	-0.0913111	0.927245
ARF4	132.252	0.0971638	0.503819	0.192855	0.847073	0.971042	0.0387354	0.506637	0.0764559	0.939056	0.978664	-0.327014	0.502231	-0.651122	0.514968	0.878751
ARFIP2	74.2979	-0.133603	0.236483	-0.564959	0.572102	0.895958	-0.274325	0.239963	-1.1432	0.252956	0.568974	0.281019	0.241041	1.16586	0.243672	0.761124
ARHGAP1	10.9969	0.132761	0.473295	0.280503	0.779091	0.951119	0.113343	0.496264	0.228392	0.819342	0.940654	0.205296	0.50332	0.407883	0.68336	0.934587
ARHGAP15	0.0305826	0	9.22474	0	1		0	9.21431	0	1		-0.426196	9.01264	-0.0472886	0.962283
ARHGAP45	0.0914592	-0.888744	9.22474	-0.0963435	0.923248		1.39082	9.19682	0.151228	0.879796		-0.958063	9.01254	-0.106303	0.915342
ARHGAP8	45.2007	1.54458	0.726868	2.12498	0.0335885	0.408927	0.486881	0.746877	0.651889	0.514473	0.785003	0.692262	0.729778	0.948593	0.342828	0.830795
ARHGAP9	43.1418	0.049784	0.294548	0.169018	0.865782	0.973688	0.0249773	0.281338	0.0887804	0.929256	0.975056	0.764341	0.286524	2.66763	0.00763881	0.148854
ARHGEF12	1046.91	0.304502	0.161589	1.88443	0.0595072	0.513478	0.115266	0.16115	0.715272	0.474441	0.759043	0.460282	0.157714	2.91845	0.00351776	0.0926205
ARHGEF2	169.133	-0.0887219	0.210761	-0.420959	0.673785	0.922077	0.345993	0.205644	1.68249	0.0924745	0.370356	0.774296	0.203726	3.80068	0.0001443	0.0080736
ARHGEF9	201.283	0.0800061	0.24502	0.326529	0.744024	0.944401	0.131275	0.243097	0.540014	0.589188	0.822288	0.313512	0.238673	1.31356	0.188994	0.684413
ARID4B	335.435	0.396261	0.309181	1.28165	0.199966	0.727542	0.388585	0.308708	1.25874	0.208123	0.531941	0.393246	0.302079	1.3018	0.192986	0.688839
ARID5B	2.69576	-0.461661	1.0582	-0.436269	0.662641	0.920126	-1.50417	1.11548	-1.34845	0.177513	0.496275	-0.229967	1.12965	-0.203574	0.838686	0.977843
ARIH1	33.8302	0.266268	0.487515	0.546173	0.584947	0.897045	-0.285101	0.492657	-0.578701	0.562791	0.808121	0.20523	0.487078	0.42135	0.6735	0.929853
ARIH2	268.208	0.409399	0.212853	1.92339	0.0544315	0.505936	0.0204121	0.213947	0.0954074	0.923991	0.974109	0.1306	0.211224	0.618302	0.536377	0.889359
ARL1	69.9115	0.405241	0.463895	0.873561	0.382357	0.838369	0.726161	0.467182	1.55434	0.120102	0.419408	0.26332	0.464706	0.566638	0.57096	0.897172
ARL14	0.0805854	0	9.22474	0	1		0	9.21431	0	1		-0.426196	9.01264	-0.0472886	0.962283
ARL4C	0.577905	-2.22277	4.55195	-0.488312	0.625329		1.11881	4.51538	0.247778	0.804306		-0.688471	4.4734	-0.153903	0.877686
ARL4D	14.1486	-1.83194	0.81567	-2.24594	0.024708	0.364444	-0.726457	0.78105	-0.930104	0.352317	0.666465	-1.29872	0.797788	-1.62791	0.103545	0.5671
ARNT	211.746	0.220883	0.227848	0.969428	0.332331	0.825573	-0.0546504	0.227963	-0.239734	0.810537	0.934524	0.287903	0.226841	1.26918	0.204375	0.708037
ARNT2	18.523	0.00583943	0.480616	0.0121499	0.990306	0.998521	0.149936	0.477953	0.313705	0.753745	0.905165	0.293378	0.482314	0.608272	0.543007	0.889641
ARPC3	1245.97	0.480203	0.497302	0.965616	0.334236	0.827005	0.573515	0.497412	1.153	0.248912	0.568245	-0.273542	0.486386	-0.562396	0.573846	0.897641
ARPP19	112.581	0.275249	0.383084	0.718507	0.472445	0.871661	0.355804	0.385488	0.922995	0.35601	0.669871	0.243903	0.382526	0.637611	0.523727	0.882156
ARR3	0.135059	-1.20941	9.22474	-0.131106	0.895692		0	9.21431	0	1		-0.688499	9.01264	-0.0763926	0.939107
ARRDC4	81.4677	-2.15998	0.256178	-8.43159	3.41011e-17	7.84666e-14	-1.90182	0.248882	-7.64143	2.14828e-14	4.3449e-12	-1.4076	0.245052	-5.74411	9.24078e-09	1.29255e-06
ARSE	0.139094	0	9.22474	0	1		0	9.21431	0	1		0	9.01264	0	1
ARSG	116.3	-0.566527	0.318989	-1.77601	0.075731	0.570221	-0.883307	0.316947	-2.78693	0.00532107	0.0676139	-0.222031	0.30672	-0.723888	0.469134	0.866778
ASAH1	50.7037	0.123326	0.384637	0.320629	0.748491	0.946307	-0.740441	0.397674	-1.86193	0.0626125	0.298547	0.0635949	0.380621	0.167082	0.867305	0.983757
ASB3	59.5491	0.560541	0.365619	1.53313	0.125244	0.638263	0.380905	0.371504	1.02531	0.305219	0.624593	0.315753	0.367687	0.858756	0.390475	0.853224
ASB5	0.395997	0.0730283	8.69275	0.00840106	0.993297		1.84284	8.63296	0.213465	0.830964		-2.33562	8.48438	-0.275285	0.783097
ASCC3	290.44	0.558095	0.182605	3.05629	0.00224093	0.0954645	1.59523	0.180196	8.85276	8.53788e-19	2.59018e-16	0.914288	0.179483	5.09399	3.50598e-07	3.26933e-05
ASCL1	0.676673	0.944734	3.18495	0.296624	0.766753		-1.41679	3.23423	-0.438061	0.661342		-0.688496	3.16063	-0.217835	0.827558
ASF1A	381.433	0.117173	0.323204	0.362537	0.71695	0.935736	0.174083	0.323507	0.538111	0.5905	0.823646	0.164873	0.316244	0.521348	0.602124	0.914837
ASF1B	251.435	-1.50216	0.43771	-3.43187	0.00059943	0.0405673	-0.812885	0.434499	-1.87086	0.0613652	0.294917	0.307025	0.422668	0.726397	0.467595	0.866778
ASGR1	6.13913	1.41939	0.748716	1.89577	0.0579904	0.510903	-0.0806575	0.793917	-0.101594	0.919079	0.973091	-0.643826	0.817598	-0.78746	0.431013	0.8617
ASNS	553.969	0.466293	0.357992	1.30253	0.192737	0.721118	1.48722	0.357402	4.1612	3.16585e-05	0.00121961	0.287512	0.350538	0.820201	0.412102	0.8617
ASPM	2.97084	-1.67286	1.46374	-1.14286	0.253096	0.786208	0.42097	1.09763	0.383525	0.70133	0.880108	4.00692	1.16005	3.4541	0.000552125	0.0220653
ASPN	0.597993	0	8.16578	0	1		0.0456188	8.12399	0.00561531	0.99552		2.3475	7.93255	0.295933	0.767281
ASS1	35.7369	-0.541953	0.364982	-1.48487	0.137577	0.663815	0.628272	0.332935	1.88707	0.0591506	0.287274	0.692332	0.353223	1.96004	0.0499906	0.419458
ASTN2	0.481903	0.773106	3.57619	0.216181	0.828846		1.32227	3.53424	0.374132	0.708306		-2.89837	3.48998	-0.830484	0.406265
ATAD2	9.92648	-0.398786	0.579389	-0.688286	0.491273	0.872575	-0.836991	0.677106	-1.23613	0.21641	0.537592	0.0808076	0.59805	0.135118	0.892518	0.983757
ATAD5	10.7893	0.728805	0.584732	1.24639	0.212621	0.751378	-0.105201	0.631662	-0.166547	0.867726	0.95726	0.0328422	0.602149	0.0545417	0.956504	0.992334
ATF1	17.7541	0.195835	0.454562	0.430821	0.666598	0.920126	0.303268	0.441474	0.686943	0.492119	0.769384	0.0535631	0.4272	0.125382	0.900221	0.985136
ATF3	1.41559	-1.86073	1.75647	-1.05936	0.289435	0.809223	0.476242	1.43478	0.331927	0.739944	0.899552	-0.194835	1.76789	-0.110208	0.912245
ATF4	2377.75	0.501128	0.216532	2.31434	0.020649	0.341956	0.304686	0.216675	1.40619	0.159668	0.473221	0.0965513	0.211838	0.45578	0.648548	0.925954
ATF5	761.563	-0.376231	0.474649	-0.79265	0.427982	0.852379	-0.0731048	0.473752	-0.15431	0.877365	0.961339	0.184491	0.463209	0.398289	0.690417	0.937593
ATF6	99.941	0.0879465	0.308004	0.285537	0.775233	0.951119	-0.165983	0.310781	-0.534084	0.593284	0.825327	0.160493	0.306873	0.522994	0.600979	0.914682
ATF6B	31.9874	-0.585003	0.423818	-1.38032	0.167489	0.698176	-0.323001	0.420803	-0.767583	0.442735	0.732615	0.183036	0.414174	0.441929	0.65854	0.928679
ATG12	34.5106	0.174291	0.280763	0.620777	0.534746	0.885563	-0.101093	0.294435	-0.343346	0.731338	0.896522	-0.560121	0.336484	-1.66463	0.0959874	0.552507
ATG3	100.441	0.305242	0.505743	0.603551	0.546142	0.886579	0.251456	0.507998	0.494994	0.620604	0.83958	-0.114076	0.503524	-0.226556	0.820769	0.973301
ATG4C	83.8124	0.426317	0.240321	1.77395	0.0760718	0.570221	0.52531	0.241962	2.17104	0.0299278	0.208122	0.563448	0.23793	2.36813	0.0178784	0.23575
ATIC	291.51	0.0341312	0.225167	0.151582	0.879517	0.978894	-0.206748	0.225981	-0.914889	0.36025	0.672042	0.286965	0.221666	1.29458	0.195464	0.693669
ATM	237.479	0.254396	0.25521	0.996809	0.318857	0.824432	0.135517	0.253759	0.534041	0.593313	0.825327	0.18842	0.245915	0.766202	0.443556	0.8617
ATMIN	305.265	0.141611	0.179099	0.790686	0.429127	0.852726	-0.103357	0.179028	-0.577324	0.56372	0.808121	0.458402	0.173134	2.64767	0.0081048	0.153716
ATP11B	225.507	0.202264	0.199738	1.01264	0.31123	0.820497	-0.320461	0.200829	-1.5957	0.110557	0.398056	0.270354	0.193925	1.39411	0.163283	0.660049
ATP11C	900.31	0.286744	0.135116	2.12221	0.03382	0.409578	-0.0805817	0.135317	-0.595503	0.551507	0.80338	0.28837	0.131484	2.19319	0.0282933	0.300511
ATP12A	0.0603348	0	9.22474	0	1		0	9.21431	0	1		-0.426196	9.01264	-0.0472886	0.962283
ATP1A1	149.433	0.193283	0.218862	0.883124	0.377169	0.838369	0.376324	0.216636	1.73713	0.0823646	0.350085	0.391217	0.218837	1.78771	0.0738223	0.497284
ATP1A2	1.0938	-1.80423	1.90541	-0.946897	0.343691		-0.509589	2.00697	-0.25391	0.799565	0.92849	0.828507	1.76541	0.4693	0.638855
ATP1B1	319.823	-0.0245824	0.141807	-0.173352	0.862375	0.973049	-0.498348	0.14296	-3.48593	0.000490437	0.0121458	0.107676	0.139122	0.773968	0.43895	0.8617
ATP2C1	691.848	-0.137584	0.143584	-0.958215	0.337954	0.828812	-0.35682	0.143582	-2.48514	0.0129502	0.12522	0.225509	0.139846	1.61255	0.106842	0.575635
ATP5B	9857.4	-0.159279	0.169765	-0.938231	0.348126	0.829551	-0.208502	0.16975	-1.22829	0.219339	0.540066	0.152038	0.165845	0.916745	0.359276	0.837866
ATP5C1	8448.31	-0.230404	0.294586	-0.78213	0.434138	0.853589	-0.422384	0.294609	-1.43371	0.151654	0.463558	-0.24556	0.287838	-0.853119	0.393593	0.856481
ATP5J	6.1223	0.326854	0.590827	0.553213	0.580117	0.896588	0.0233735	0.650621	0.0359249	0.971342	0.988022	-3.05834	1.153	-2.6525	0.00798988	0.152832
ATP5S	15.5664	0.181665	0.475684	0.381903	0.702533	0.932457	-0.444927	0.506581	-0.878294	0.379784	0.684842	0.177765	0.500599	0.355103	0.722512	0.946919
ATP6AP1	121.653	0.181989	0.300861	0.604895	0.545249	0.886579	-0.400041	0.303097	-1.31985	0.186886	0.507919	0.0989956	0.300705	0.329211	0.741996	0.953232
ATP6V0A4	0.290796	1.95012	8.93094	0.218355	0.827152		-0.768829	8.96169	-0.0857906	0.931633		-1.30289	8.75745	-0.148775	0.881732
ATP6V0B	54.7164	-0.249483	0.354561	-0.703639	0.481658	0.871661	0.318963	0.359253	0.88785	0.374621	0.681105	-0.16171	0.347529	-0.465315	0.641706	0.923447
ATP6V0E1	2145.05	-0.397314	0.175204	-2.26772	0.0233461	0.359986	-0.202966	0.175091	-1.15921	0.246371	0.567339	-0.240235	0.171191	-1.40332	0.160523	0.654968
ATP6V1B1	1.44755	2.1813	1.607	1.35737	0.174662	0.705084	-1.88395	1.81884	-1.03579	0.300299	0.617118	0.587023	1.57695	0.372253	0.709705
ATP6V1B2	1648.41	-0.38638	0.379819	-1.01727	0.309023	0.820497	-0.728928	0.379891	-1.91878	0.0550121	0.275573	-0.218821	0.371046	-0.589741	0.555364	0.894275
ATP6V1D	472.393	0.114912	0.360543	0.31872	0.749939	0.947113	0.19936	0.360768	0.5526	0.580538	0.818137	-0.266779	0.352947	-0.755862	0.449732	0.86435
ATP6V1F	1298.97	-0.0591035	0.120457	-0.490662	0.623665	0.911547	0.226744	0.120355	1.88396	0.0595706	0.288004	0.0947502	0.118035	0.802731	0.42213	0.8617
ATRAID	928.623	-0.0420453	0.259951	-0.161743	0.871508	0.976785	0.539285	0.259648	2.07698	0.0378031	0.237075	0.308519	0.25371	1.21603	0.223974	0.729626
ATRX	61.6597	-0.020389	0.407967	-0.049977	0.960141	0.998314	-0.052488	0.413259	-0.12701	0.898933	0.964745	0.0598199	0.406124	0.147295	0.882899	0.983757
AURKA	28.354	0.565322	0.388545	1.45497	0.145677	0.672773	1.13506	0.374028	3.03469	0.00240783	0.038446	1.30988	0.367795	3.56144	0.000368824	0.0166375
AURKB	59.4429	-0.188133	0.302293	-0.622353	0.53371	0.885533	1.28016	0.290999	4.39919	1.08655e-05	0.00050273	1.55652	0.295188	5.27296	1.34243e-07	1.50218e-05
AVP	0.439921	0	9.22474	0	1		3.46079	9.15293	0.378107	0.705351		-0.944736	9.01255	-0.104824	0.916515
AXIN1	1.69884	0.00457492	1.25846	0.00363533	0.997099	0.998521	0.363156	1.12795	0.321961	0.747482	0.902799	0.0255939	1.50236	0.0170358	0.986408	0.998038
AXL	1.46872	-1.41868	1.49778	-0.947186	0.343544	0.829551	-0.707206	1.61566	-0.43772	0.661589	0.859217	-2.96054	1.75609	-1.68588	0.0918195
B2M	379.389	0.417136	0.587063	0.710548	0.477365	0.871661	0.551513	0.587792	0.938278	0.348102	0.663663	-0.351574	0.575382	-0.611027	0.541182	0.889641
B3GALT6	649.895	-0.526934	0.679342	-0.775653	0.437954	0.853589	-1.75098	0.679995	-2.57499	0.0100243	0.104418	-0.733013	0.664166	-1.10366	0.269741	0.77639
B3GAT1	35.051	0.0563787	0.297119	0.189752	0.849504	0.971042	-0.0895654	0.293044	-0.305638	0.75988	0.908487	0.697273	0.269206	2.59011	0.00959454	0.166861
B3GNT2	0.611019	-2.09941	3.69676	-0.567905	0.5701		-0.455467	3.70636	-0.122888	0.902196		0.361954	3.52661	0.102635	0.918253
B4GALT1	0.79053	-3.36843	2.4323	-1.38487	0.166092		0.162777	2.41747	0.0673338	0.946316	0.979166	-0.558638	2.36823	-0.235889	0.813519
B4GALT2	2.79869	-2.68255	1.35155	-1.98479	0.0471675	0.484743	-3.31268	1.50077	-2.20733	0.0272911	0.19713	-0.722927	1.00541	-0.719033	0.47212	0.866778
B4GALT5	6.58803	0.486896	0.612641	0.794749	0.426759	0.852379	-0.241789	0.664383	-0.36393	0.715911	0.889159	-0.639595	0.670025	-0.954583	0.339789	0.827472
B4GAT1	2.52445	-0.247333	1.17676	-0.210181	0.833526	0.968652	-2.81932	1.61933	-1.74104	0.0816765	0.348466	-1.06329	1.20262	-0.884144	0.376618	0.849392
BAAT	15.5623	1.18358	0.364716	3.24522	0.00117359	0.0628009	-0.102933	0.383161	-0.268641	0.788206	0.920118	-0.357822	0.381081	-0.938966	0.347748	0.831475
BACE2	0.440478	-0.152545	7.52785	-0.0202641	0.983833		2.39209	7.48702	0.319497	0.749349		1.8543	7.33259	0.252884	0.800358
BAD	10.8985	-0.76062	0.440922	-1.72507	0.0845156	0.586814	-0.120205	0.411017	-0.292457	0.769937	0.912421	-0.393493	0.443716	-0.886813	0.37518	0.849392
BAG3	63.6516	-0.449858	0.325029	-1.38406	0.166341	0.695368	0.0928535	0.314925	0.294843	0.768114	0.912121	0.152841	0.324232	0.471395	0.637359	0.923447
BAK1	1.47244	-0.00863425	1.45717	-0.00592537	0.995272	0.998521	-4.26084	1.81063	-2.35324	0.0186107	0.15738	0.959963	1.50758	0.636759	0.524282
BAMBI	1.98594	-0.103934	1.31199	-0.0792192	0.936858	0.99187	1.26424	1.10023	1.14907	0.250528	0.568245	-0.660979	1.46477	-0.451251	0.651809	0.927367
BANF1	285.8	0.143081	0.491575	0.291067	0.771	0.951119	0.660783	0.492091	1.34281	0.179335	0.49708	-0.283129	0.482842	-0.586379	0.557621	0.894275
BAX	2187.74	-0.145664	0.0888221	-1.63995	0.101015	0.60503	1.15598	0.0875804	13.1991	8.88244e-40	2.15577e-36	0.55471	0.0864662	6.41534	1.40507e-10	3.04943e-08
BBC3	147.507	1.29393	0.288351	4.48734	7.21175e-06	0.00165942	1.45808	0.286528	5.08877	3.60397e-07	2.5726e-05	0.467885	0.288073	1.62419	0.104335	0.569517
BBOX1	0.166445	-0.888822	9.22474	-0.096352	0.923241		-1.85439	9.2127	-0.201287	0.840475		2.08528	8.97241	0.232411	0.816219
BBS10	17.4917	0.0178375	0.516725	0.0345204	0.972462	0.998359	-0.36165	0.54043	-0.66919	0.503374	0.778642	-0.832245	0.556064	-1.49667	0.134479	0.615823
BCAS2	480.478	0.174345	0.448737	0.388525	0.697628	0.932457	0.252627	0.449088	0.562533	0.573753	0.814803	-0.30745	0.440034	-0.698696	0.484742	0.86913
BCAT1	2204.5	0.598754	0.391469	1.5295	0.12614	0.640724	0.876284	0.39146	2.2385	0.0251884	0.187332	0.386348	0.382668	1.00962	0.312679	0.811434
BCAT2	5.58276	0.0231177	0.639757	0.0361351	0.971175	0.998359	0.086537	0.607654	0.142412	0.886755	0.964659	0.728576	0.656672	1.1095	0.267216	0.77639
BCL2	21.4712	-0.0734177	0.671481	-0.109337	0.912935	0.982809	-1.43432	0.701792	-2.0438	0.0409732	0.24373	-0.31206	0.662066	-0.471343	0.637396	0.923447
BCL2A1	0.40423	-1.7898	9.22263	-0.194066	0.846124		0	9.21431	0	1		1.55333	8.9723	0.173125	0.862553
BCL2L1	2450.84	-0.355575	0.161188	-2.20597	0.0273864	0.371859	-0.152022	0.160806	-0.945375	0.344467	0.658858	0.249669	0.157172	1.5885	0.112173	0.584934
BCL2L11	435.398	-0.507316	0.269079	-1.88538	0.0593784	0.513478	-0.949744	0.269055	-3.52992	0.000415685	0.0107326	-0.167078	0.262451	-0.636608	0.52438	0.882156
BCL2L13	536.59	-0.849446	0.223415	-3.80209	0.000143479	0.0126979	-0.650109	0.222979	-2.91556	0.00355046	0.0495959	-0.311024	0.217151	-1.43229	0.15206	0.636092
BCL2L2	51.2156	-0.145294	0.379374	-0.382984	0.701732	0.932457	-0.732029	0.381046	-1.9211	0.0547187	0.274953	0.424606	0.371557	1.14277	0.253132	0.773921
BCL3	9.3297	-0.495902	0.84974	-0.583593	0.559494	0.89287	0.0347524	0.816045	0.0425864	0.966031	0.986203	-0.16196	0.80181	-0.201993	0.839922	0.977843
BCL7B	118.899	-0.0735071	0.460362	-0.159673	0.873139	0.977661	-0.610658	0.46133	-1.32369	0.185607	0.506343	-0.193118	0.449241	-0.429877	0.667285	0.929135
BDH1	1.94305	0.659734	1.37701	0.479106	0.631863	0.911547	-2.57029	1.78672	-1.43855	0.150277	0.461803	0.198336	1.46011	0.135836	0.891951	0.983757
BDNF	3.19538	-2.19772	1.38211	-1.59012	0.111807	0.621421	0.336205	1.24749	0.269506	0.787541	0.920009	-1.07428	1.29511	-0.829487	0.406829	0.8617
BECN1	73.9183	0.040362	0.449921	0.0897092	0.928518	0.987758	0.283563	0.451129	0.628564	0.529635	0.792004	-0.15276	0.447436	-0.341413	0.732793	0.951072
BEX3	2341.52	-0.21293	0.268732	-0.792351	0.428156	0.852379	-0.398204	0.268911	-1.4808	0.13866	0.448205	-0.234705	0.262671	-0.893532	0.371572	0.846821
BHLHE40	0.424479	0	6.4538	0	1		-1.27134	6.44295	-0.197323	0.843575		3.27247	6.22258	0.525903	0.598956
BID	487.198	-0.094415	0.109645	-0.861099	0.389184	0.838369	0.231775	0.107928	2.1475	0.0317534	0.214071	0.648347	0.10573	6.13213	8.6712e-10	1.38615e-07
BIN2	0.211422	0	9.22474	0	1		0	9.21431	0	1		-2.76704	9.00127	-0.307406	0.758535
BIRC2	62.4961	0.0188773	0.258379	0.0730605	0.941758	0.992143	0.120574	0.257971	0.467395	0.640217	0.848148	-0.650263	0.266863	-2.43669	0.0148223	0.216813
BIRC3	0.193386	0.393505	9.22474	0.0426576	0.965974		0	9.21431	0	1		0	9.01264	0	1
BIRC5	20.2576	0.29518	0.552125	0.534626	0.592908	0.898908	1.01456	0.546434	1.85669	0.0633554	0.300319	0.619328	0.530509	1.16742	0.24304	0.761124
BIRC6	199.725	0.559258	0.312891	1.78739	0.0738749	0.564391	-0.137175	0.315119	-0.435312	0.663336	0.859217	0.266681	0.308333	0.864913	0.387086	0.852262
BLCAP	5.37582	0.224088	0.843222	0.265752	0.790431	0.955201	-0.9709	0.918673	-1.05685	0.29058	0.605732	0.191438	0.854112	0.224137	0.822651	0.973301
BLMH	18.6025	0.2167	0.531027	0.408077	0.683217	0.923986	0.832214	0.541196	1.53773	0.124114	0.423068	-0.00737013	0.550676	-0.0133838	0.989322	0.998038
BLNK	0.156887	0.0729132	9.22474	0.00790409	0.993694		-1.08958	9.21431	-0.118248	0.905871		1.52551	9.00076	0.169486	0.865414
BLOC1S2	190.353	0.351456	0.501009	0.701496	0.482993	0.871661	1.06965	0.502066	2.1305	0.0331303	0.220294	-0.15014	0.494716	-0.303487	0.761518	0.956578
BLVRA	22.1946	0.281367	0.428165	0.657146	0.511087	0.87306	0.889549	0.427521	2.08072	0.0374598	0.236914	0.318274	0.456041	0.697907	0.485235	0.86913
BLVRB	1.73181	1.11624	1.66253	0.671409	0.50196	0.872575	-3.87959	1.94501	-1.99464	0.0460822	0.252464	-0.409771	1.68325	-0.24344	0.807665	0.971842
BMF	179.477	-0.919903	0.18078	-5.08853	3.60843e-07	0.000135795	-1.16038	0.178784	-6.49042	8.55961e-11	9.89246e-09	0.105709	0.17217	0.613977	0.53923	0.889359
BMP15	0.115473	-1.20937	9.22474	-0.131101	0.895695		0.511423	9.21431	0.0555032	0.955738		0.00363338	9.01254	0.000403147	0.999678
BMP4	1.5576	-2.33188	1.92979	-1.20836	0.226908	0.77289	-1.43222	1.79768	-0.796705	0.425622	0.718849	-2.66764	1.95453	-1.36485	0.1723	0.662698
BMP5	0.473196	-2.15324	4.54618	-0.473638	0.635758		0.248614	4.53301	0.0548452	0.956262		1.27286	4.42564	0.287609	0.773646
BMP6	0.378383	1.98847	5.32827	0.373193	0.709005		-1.41726	5.39499	-0.262698	0.792783		-1.76461	5.26835	-0.334946	0.737665
BNC2	0.385752	-1.12932	7.57301	-0.149124	0.881456		-3.09894	7.55513	-0.410177	0.681676		-0.688498	7.40376	-0.092993	0.925909
BNIP3	0.919956	-3.17311	3.10442	-1.02213	0.306721		-1.09069	3.14303	-0.347019	0.728577	0.896227	-2.93588	3.03439	-0.967535	0.333277
BNIP3L	118.029	0.342235	0.390881	0.875546	0.381277	0.838369	0.329909	0.394306	0.836684	0.40277	0.69873	-0.0763521	0.392841	-0.194359	0.845895	0.978767
BOD1	1.72986	0.450482	1.10583	0.407372	0.683735	0.923986	-1.92366	1.32146	-1.45571	0.145472	0.455563	-1.42924	1.59109	-0.89828	0.369036	0.843619
BPHL	1149.64	-0.268232	0.128916	-2.08066	0.0374648	0.428889	-0.335393	0.129053	-2.59888	0.00935271	0.100885	0.0270919	0.126185	0.214699	0.830002	0.973926
BPIFA1	0
BPIFA2	0.104998	-1.20941	9.22474	-0.131106	0.895692		0	9.21431	0	1		1.2632	9.00076	0.140344	0.888388
BPIFB1	0.16139	0	9.22474	0	1		-1.08994	9.21431	-0.118287	0.90584		-1.7294	9.01004	-0.191941	0.847788
BRCA1	3.92981	-0.162863	0.897907	-0.18138	0.856069	0.972549	1.21848	0.900937	1.35246	0.176228	0.493992	-0.411237	0.982666	-0.418491	0.675588	0.931587
BRD2	99.0424	0.273994	0.508056	0.539298	0.589681	0.898908	0.825966	0.508813	1.62332	0.104521	0.386412	-0.376548	0.504225	-0.746785	0.455193	0.866778
BRD3	274.14	0.0888512	0.25797	0.344425	0.730527	0.940125	-0.233374	0.257536	-0.906177	0.364842	0.672859	0.0216275	0.251551	0.0859767	0.931485	0.986918
BRE-AS1	0.546374	-1.20071	3.37478	-0.35579	0.721998		-0.43801	3.43201	-0.127625	0.898446		-1.99259	3.34132	-0.596348	0.550943
BRIP1	18.6802	-0.456526	0.538628	-0.847572	0.396677	0.839699	-0.41284	0.540774	-0.763424	0.44521	0.734053	0.45358	0.51767	0.876194	0.380924	0.851765
BRMS1L	786.498	0.00536214	0.229818	0.0233322	0.981385	0.998359	0.194567	0.229395	0.848173	0.396341	0.695029	0.00184812	0.224382	0.00823648	0.993428	0.998038
BRPF3	8.67017	0.00392097	0.742508	0.00528071	0.995787	0.998521	-0.629885	0.759749	-0.82907	0.407065	0.701146	-1.36002	0.851401	-1.59739	0.110179	0.584934
BSCL2	562.889	-0.157708	0.218105	-0.723083	0.469629	0.871661	-0.516937	0.218701	-2.36367	0.0180947	0.154091	-0.237257	0.213669	-1.11039	0.266829	0.77639
BTG2	171.164	-0.130372	0.195255	-0.667701	0.504325	0.872575	0.0519899	0.195518	0.265909	0.790309	0.921268	-0.0102903	0.197655	-0.0520619	0.958479	0.992334
BTG3	138.402	0.65603	0.390247	1.68106	0.0927503	0.597811	0.933632	0.390103	2.3933	0.0166978	0.148944	-0.138094	0.384241	-0.359393	0.719301	0.946919
BTK	5.97481	-0.0975994	0.757326	-0.128874	0.897458	0.979283	-0.993447	0.796244	-1.24767	0.212153	0.53477	-0.0718429	0.742507	-0.0967572	0.922919	0.986595
BTN3A2	15.7172	-0.0329381	0.452747	-0.0727517	0.942004	0.992143	-0.265591	0.459671	-0.577784	0.56341	0.808121	0.404502	0.441356	0.916497	0.359406	0.837866
BTN3A3	0.281825	1.82552	9.18877	0.198669	0.842522		1.9755	9.17765	0.215252	0.829571		-0.688387	9.01264	-0.0763801	0.939117
BUB1	12.39	1.28862	0.644266	2.00013	0.0454862	0.475744	1.83727	0.605294	3.03534	0.00240264	0.038446	1.41266	0.596683	2.36752	0.0179077	0.23575
BUB1B	8.364	1.66425	0.744528	2.23531	0.0253971	0.365813	1.03034	0.748696	1.37617	0.168767	0.482448	0.625809	0.714308	0.876106	0.380973	0.851765
BZW1	5014.14	-0.2907	0.0915092	-3.17674	0.00148943	0.0758071	-0.112558	0.0914185	-1.23123	0.218236	0.539922	0.0674501	0.0894413	0.754128	0.450773	0.864464
BZW2	163.156	-0.147522	0.411831	-0.358211	0.720186	0.937078	-0.239586	0.41336	-0.579606	0.56218	0.808121	-0.535402	0.404455	-1.32376	0.185582	0.680881
C15orf48	1.29836	-0.504133	1.64489	-0.306485	0.759235	0.948823	-0.182715	1.81108	-0.100888	0.91964	0.973091	0.100262	1.66988	0.0600412	0.952123
C16orf72	214.635	0.108632	0.347226	0.312858	0.754389	0.948823	0.210851	0.347766	0.6063	0.544316	0.798703	0.368249	0.339189	1.08567	0.277624	0.782727
C1D	27.7777	-0.110563	0.502656	-0.219958	0.825904	0.968652	0.773647	0.492849	1.56975	0.116474	0.410825	-0.578264	0.496153	-1.1655	0.243818	0.761124
C1orf112	185.848	0.0983244	0.180018	0.546193	0.584933	0.897045	-0.144908	0.178829	-0.810313	0.417761	0.712654	0.40151	0.173966	2.30798	0.0210002	0.253084
C1orf131	180.246	0.229759	0.256859	0.894493	0.371058	0.838369	0.112545	0.257505	0.437059	0.662069	0.859217	0.132652	0.253732	0.522803	0.601112	0.914682
C1orf162	4.55847	-1.00454	0.815454	-1.23188	0.217994	0.757709	0.94896	0.765596	1.23951	0.215158	0.537561	1.25767	0.795598	1.58079	0.113926	0.584934
C1orf194	0.139842	-0.888822	9.22474	-0.096352	0.923241		-1.41722	9.21419	-0.153808	0.877761		-0.958145	9.01254	-0.106312	0.915334
C1QA	0.0347283	0	9.22474	0	1		-0.769589	9.21431	-0.0835211	0.933437		0	9.01264	0	1
C1QB	2.14788	-0.244481	1.19064	-0.205336	0.837309	0.968652	-1.28333	1.23823	-1.03642	0.300005	0.617044	-1.71116	1.32702	-1.28948	0.197233	0.694036
C1QBP	1354.71	-0.202951	0.128679	-1.57719	0.114753	0.632006	0.23865	0.128467	1.85767	0.0632158	0.300319	0.139384	0.125754	1.10839	0.267693	0.77639
C1QC	0.34727	-1.10325	8.77209	-0.125768	0.899916		0	8.79239	0	1		-0.958128	8.59897	-0.111424	0.911281
C1R	1.13529	-1.36245	2.31749	-0.587898	0.556601		-3.15326	2.45589	-1.28396	0.199157	0.522516	1.89342	2.27042	0.83395	0.404309
C1RL	0.366908	-1.46681	9.21849	-0.159116	0.873577		-2.72677	9.20354	-0.296274	0.767021		2.73142	8.95905	0.304879	0.760459
C1S	32.5668	1.63314	0.477023	3.4236	0.000617979	0.0406277	-0.28633	0.494427	-0.579116	0.562511	0.808121	0.274171	0.45506	0.602494	0.546845	0.892012
C20orf85	0.16276	-1.20937	9.22474	-0.131101	0.895695		0.51152	9.21431	0.0555137	0.955729		-0.958102	9.01254	-0.106308	0.915338
C2CD2	5.85366	0.309194	0.697593	0.44323	0.657599	0.920126	0.955616	0.63822	1.49731	0.134312	0.441699	0.985831	0.629083	1.56709	0.117093	0.587882
C2CD2L	1.54068	0.786982	1.44575	0.544343	0.586206	0.897045	-0.130854	1.47196	-0.0888978	0.929163	0.975056	-1.09537	1.53753	-0.712424	0.476202	0.866778
C2CD5	932.085	0.00618298	0.152154	0.0406364	0.967586	0.998359	-0.200066	0.152103	-1.31533	0.1884	0.51032	0.184435	0.148626	1.24093	0.21463	0.717936
C3	0.616309	-3.6978	3.14849	-1.17447	0.240208		-0.770159	3.19689	-0.240909	0.809626		1.25724	3.05815	0.411112	0.68099
C3AR1	0.0443546	0	9.22474	0	1		0	9.21431	0	1		0	9.01264	0	1
C5	9.18522	-0.904455	0.628547	-1.43896	0.150161	0.677112	-1.27355	0.6406	-1.98806	0.0468045	0.252524	0.199902	0.554157	0.360732	0.7183	0.946919
C5AR1	0.73035	-3.6332	4.98465	-0.728878	0.466077		0	5.01318	0	1		0.128208	4.80942	0.0266577	0.978733
C5orf49	0.249523	0	9.22474	0	1		-1.08959	9.21431	-0.11825	0.905869		-1.5318	9.0113	-0.169987	0.86502
C6orf62	968.871	-0.380603	0.264513	-1.43888	0.150183	0.677112	-0.692911	0.2649	-2.61575	0.00890326	0.0973342	-0.150951	0.258875	-0.583102	0.559825	0.894275
C9orf116	1.33093	-0.379974	2.11291	-0.179834	0.857283	0.972549	-3.39519	2.32194	-1.46222	0.143681	0.453792	-0.7881	2.13688	-0.368808	0.712271
C9orf24	5.82903	2.41687	1.05509	2.29069	0.0219815	0.347761	-0.951985	1.1131	-0.855253	0.392411	0.693146	-1.08197	1.12775	-0.959404	0.337355	0.826375
C9orf3	87.1611	-0.354466	0.279703	-1.2673	0.205049	0.732637	-0.144712	0.27241	-0.531227	0.595261	0.825327	0.107951	0.270018	0.399793	0.689309	0.936657
CA1	0.244972	1.5542	9.19693	0.168991	0.865804		-3.19867	9.19954	-0.347699	0.728066		0.797843	9.01264	0.0885249	0.929459
CA2	1.24218	-0.0542654	1.62776	-0.0333375	0.973405	0.998359	-0.278182	1.65766	-0.167817	0.866728	0.95726	-1.67658	1.93008	-0.868659	0.385033
CA7	0.909517	-2.33731	2.35088	-0.994229	0.320111		-0.446048	2.37393	-0.187894	0.850959	0.951432	-2.20316	2.29285	-0.960882	0.336612
CA9	0.342176	-0.316482	7.64059	-0.0414211	0.96696		1.39227	7.66786	0.181572	0.855919		-0.688439	7.51808	-0.0915711	0.927039
CAB39	233.783	0.547439	0.334349	1.63733	0.101562	0.60503	0.2857	0.335654	0.851173	0.394673	0.694613	0.35391	0.329595	1.07377	0.282925	0.78859
CACNA1A	17.2497	-0.189972	0.690749	-0.275023	0.783299	0.951119	-1.39635	0.700724	-1.99272	0.0462921	0.252524	0.0888617	0.676499	0.131355	0.895494	0.983757
CACNA1B	1.73331	-3.48586	1.80827	-1.92773	0.0538892	0.505936	-1.33397	1.60567	-0.83079	0.406093	0.700986	-1.36372	1.50609	-0.905472	0.365216	0.841567
CACNA2D4	0.211969	2.05279	9.18302	0.223542	0.823114		0	9.21431	0	1		-0.426196	9.01264	-0.0472886	0.962283
CALCOCO1	168.881	-0.0483427	0.429404	-0.112581	0.910363	0.982809	-0.209575	0.427781	-0.489913	0.624196	0.84069	0.0598027	0.416559	0.143563	0.885845	0.983757
CALM1	217	-0.369397	0.197138	-1.8738	0.0609587	0.513478	-0.17855	0.197633	-0.903443	0.366291	0.672859	-0.220621	0.198849	-1.10949	0.26722	0.77639
CALM3	17.3052	-1.12404	0.618826	-1.81641	0.0693068	0.548668	-1.55673	0.655227	-2.37586	0.0175083	0.151798	-0.482533	0.631972	-0.763536	0.445144	0.862538
CALR	918.476	0.178237	0.296983	0.60016	0.5484	0.887876	-0.726429	0.297421	-2.44243	0.0145887	0.13618	-0.180025	0.291072	-0.61849	0.536252	0.889359
CALU	70.7277	0.0916809	0.226657	0.404491	0.685851	0.925055	0.188873	0.227747	0.829309	0.40693	0.701146	0.100178	0.221936	0.451384	0.651713	0.927367
CAMK2B	666.051	-0.258456	0.174456	-1.48149	0.138475	0.663815	-0.711821	0.174154	-4.0873	4.36419e-05	0.00165498	0.184074	0.169612	1.08527	0.277803	0.782727
CAMP	0.0560027	0	9.22474	0	1		-0.769546	9.21431	-0.0835164	0.933441		-0.426196	9.01264	-0.0472886	0.962283
CAMSAP2	103.288	0.462737	0.272595	1.69753	0.089597	0.594355	0.183013	0.272354	0.671967	0.501605	0.777391	0.285724	0.269643	1.05964	0.28931	0.796403
CANT1	43.1747	-0.0706446	0.248465	-0.284324	0.776162	0.951119	-0.0347788	0.250965	-0.13858	0.889782	0.964745	0.448951	0.251726	1.78349	0.0745066	0.497284
CANX	50.2104	0.257007	0.543137	0.47319	0.636077	0.912991	0.342689	0.55114	0.621782	0.534085	0.794255	0.0660508	0.549079	0.120294	0.904251	0.985568
CAPN1	11.3061	-0.539241	0.531423	-1.01471	0.310243	0.820497	0.363541	0.512195	0.709771	0.477846	0.759598	0.777738	0.522998	1.48708	0.136995	0.618025
CAPS	6.66613	-0.529251	1.34206	-0.394357	0.693317	0.931304	-2.7265	1.46327	-1.8633	0.0624205	0.298547	-1.8941	1.36137	-1.39132	0.164129	0.660049
CARD16	0.0767763	0.0729132	9.22474	0.00790409	0.993694		-0.769596	9.21431	-0.0835219	0.933437		-0.958145	9.01254	-0.106312	0.915334
CARD8	4.6566	-1.02768	0.933084	-1.10138	0.27073	0.7983	-0.138657	0.889785	-0.155832	0.876165	0.960892	-1.32513	0.837541	-1.58216	0.113613	0.584934
CARMIL1	42.1943	0.0180577	0.39155	0.0461185	0.963216	0.998314	0.438635	0.378975	1.15742	0.247099	0.567369	0.6703	0.373392	1.79516	0.0726275	0.497284
CARS	121.601	-0.425984	0.224706	-1.89574	0.0579948	0.510903	0.127977	0.22252	0.575127	0.565205	0.809287	0.0806556	0.222866	0.361901	0.717426	0.946919
CASC3	17.1681	0.795291	0.493574	1.61129	0.107116	0.609057	0.0650053	0.50065	0.129842	0.896692	0.964745	-0.227432	0.525162	-0.433069	0.664965	0.929135
CASK	41.2295	0.554847	0.327942	1.6919	0.0906643	0.594355	0.798204	0.324956	2.45635	0.0140357	0.132608	0.270044	0.336402	0.802743	0.422123	0.8617
CASP1	0.297881	-0.888822	9.22474	-0.096352	0.923241		0	9.21431	0	1		-1.49758	9.0115	-0.166186	0.868011
CASP10	2.23059	-0.54886	1.22781	-0.447023	0.654859	0.91892	-0.154837	1.19907	-0.129131	0.897254	0.964745	-2.62374	1.47174	-1.78274	0.0746285	0.497284
CASP2	155.224	-0.0311549	0.268452	-0.116054	0.90761	0.982809	-0.411001	0.269448	-1.52534	0.127173	0.428207	0.294971	0.263939	1.11757	0.263749	0.77639
CASP3	320.642	0.468817	0.483277	0.970079	0.332007	0.825573	-0.070519	0.484651	-0.145505	0.884312	0.964163	-0.635214	0.475778	-1.3351	0.181842	0.674616
CASP4	0.176117	2.14047	9.18103	0.23314	0.815653		0.749993	9.1968	0.0815493	0.935005		-0.688414	9.01264	-0.0763831	0.939114
CASP7	3.85847	-0.596396	0.930106	-0.641213	0.521385	0.880409	-0.360113	0.901972	-0.399251	0.689708	0.872289	-1.12185	0.935876	-1.19871	0.230639	0.739916
CASP8	0.220833	-1.20941	9.22474	-0.131106	0.895692		0	9.21431	0	1		1.93187	8.95828	0.215652	0.829259
CASP9	46.3768	-0.125692	0.277833	-0.452401	0.65098	0.91675	-0.147359	0.283075	-0.520566	0.602669	0.832013	-0.0593652	0.285439	-0.207979	0.835245	0.975615
CASR	0.550356	0	4.45746	0	1		-0.769959	4.45628	-0.17278	0.862824		-3.22085	4.32597	-0.744538	0.456551
CAST	53.0399	0.0746344	0.326245	0.228768	0.819049	0.967123	-0.247102	0.323206	-0.764535	0.444549	0.73346	-0.105802	0.303431	-0.348686	0.727325	0.946919
CAT	166.084	-0.19809	0.306844	-0.645571	0.518557	0.878645	-0.354589	0.306757	-1.15593	0.247711	0.5677	-0.0370888	0.300784	-0.123307	0.901864	0.985271
CAV1	0.357973	-0.888695	8.6911	-0.102253	0.918555		2.34498	8.62286	0.271949	0.785661		-0.426053	8.49127	-0.0501754	0.959983
CAV2	0.363149	0.0386485	7.48993	0.00516006	0.995883		-1.72519	7.49735	-0.230107	0.818009		-0.426193	7.33172	-0.05813	0.953645
CB	18.2399	-0.896899	0.426463	-2.10311	0.0354563	0.420542	-0.314792	0.425413	-0.739968	0.459319	0.747111	-0.134594	0.473476	-0.284268	0.776205	0.960328
CBLB	163.296	-0.0325706	0.251124	-0.1297	0.896804	0.979283	-0.0732212	0.249246	-0.293771	0.768933	0.912121	0.540251	0.244105	2.21319	0.0268847	0.296394
CBR1	243.523	-0.00466948	0.161853	-0.0288501	0.976984	0.998359	0.225732	0.160625	1.40533	0.159923	0.473221	0.200323	0.159839	1.25328	0.210104	0.716786
CBR3	0.513705	0.743431	2.90781	0.255667	0.798208		0.256295	3.05397	0.0839219	0.933119		-0.746574	3.00883	-0.248128	0.804036
CBWD1	836.356	0.162603	0.200131	0.812482	0.416515	0.847752	0.414718	0.200214	2.07138	0.0383237	0.237432	0.176735	0.196455	0.899617	0.368324	0.843619
CBWD3	3.10947	0.322472	1.06184	0.303693	0.761362	0.948823	-0.455277	1.133	-0.401834	0.687806	0.870542	-0.732614	1.18675	-0.617327	0.537019	0.889359
CBWD5	118.409	-0.102908	0.40457	-0.254364	0.799215	0.958898	-0.17672	0.403904	-0.437529	0.661728	0.859217	0.290551	0.39323	0.738882	0.459978	0.866778
CBWD6	262.768	0.165402	0.126805	1.30438	0.192104	0.721118	0.251494	0.125879	1.9979	0.0457277	0.252264	0.110208	0.126354	0.872214	0.383091	0.852262
CBX4	330.983	0.530197	0.164779	3.21763	0.00129252	0.0675931	0.0644374	0.165516	0.389313	0.697044	0.878211	0.183383	0.163799	1.11956	0.262901	0.77639
CCDC80	0.981245	1.57196	2.15091	0.730836	0.46488		0.413474	2.08389	0.198415	0.84272	0.94689	-2.5813	2.29433	-1.12508	0.260555
CCDC85B	287.146	-0.566714	0.238178	-2.37938	0.017342	0.314926	-0.163256	0.235949	-0.691914	0.488992	0.765666	0.301475	0.230676	1.30692	0.191241	0.688207
CCDC86	4.94367	-1.09348	0.735466	-1.48678	0.137073	0.663815	-0.0383809	0.706735	-0.0543074	0.95669	0.983017	1.1591	0.700368	1.65499	0.097927	0.552507
CCDC92	128.28	0.0535217	0.353839	0.15126	0.87977	0.978894	-0.373673	0.353706	-1.05645	0.290761	0.605732	0.134008	0.348157	0.384907	0.700306	0.941293
CCL11	1.54456	-0.0529617	2.04988	-0.0258365	0.979388	0.998359	0.382682	2.0787	0.184097	0.853937	0.952805	-1.04458	2.0872	-0.50047	0.616744	0.920182
CCL14	0.170579	1.93928	9.17851	0.211285	0.832665		-0.769073	9.21431	-0.0834651	0.933482		-0.426196	9.01264	-0.0472886	0.962283
CCL15	0.212452	-2.07382	9.22077	-0.224907	0.822051		0	9.21431	0	1		-1.64929	9.01055	-0.183039	0.854767
CCL2	2.45999	0.325282	1.26688	0.256758	0.797366	0.958589	0.211966	1.23944	0.171017	0.86421	0.95726	-0.532729	1.31267	-0.405837	0.684862	0.934587
CCL20	0.335153	-2.01524	4.95244	-0.406919	0.684067		-1.09051	4.9575	-0.219972	0.825893		-1.44472	4.84346	-0.298283	0.765487
CCL22	0.189197	1.2038	9.18824	0.131015	0.895763		0	9.21431	0	1		-0.958145	9.01254	-0.106312	0.915334
CCL24	0.360072	0.0428926	5.9609	0.00719565	0.994259		1.33882	5.9339	0.225622	0.821495		-0.283341	5.84089	-0.0485099	0.96131
CCL3	1.03761	0.660192	2.02593	0.325871	0.744522		-0.874102	2.15569	-0.405486	0.685121	0.870542	-1.22188	2.15977	-0.565745	0.571567
CCL3L3	0.180477	-1.44784	9.22401	-0.156964	0.875273		-1.41707	9.21419	-0.153793	0.877773		-1.56092	9.01114	-0.173221	0.862478
CCL4	0.862359	-0.450976	1.94925	-0.231359	0.817036		-0.100245	1.89045	-0.0530274	0.95771	0.983049	-1.50624	2.04848	-0.7353	0.462157
CCL5	0.156875	1.63853	9.19423	0.178213	0.858556		-0.769157	9.21431	-0.0834743	0.933474		-1.50232	9.01147	-0.166712	0.867597
CCL8	0.151648	0	9.22474	0	1		0	9.21431	0	1		-1.62682	9.0107	-0.180543	0.856727
CCNA1	1.54067	-0.817641	1.43039	-0.571623	0.567577	0.895958	-0.660617	1.74289	-0.379036	0.704661	0.882918	1.13535	1.44949	0.783276	0.433465	0.8617
CCNA2	24.0532	0.87359	0.734871	1.18877	0.234531	0.773422	1.30255	0.74266	1.7539	0.0794478	0.343096	-0.0852225	0.77275	-0.110285	0.912184	0.985568
CCNB1	73.7079	0.25232	0.45395	0.555833	0.578325	0.896588	1.41763	0.451806	3.1377	0.00170279	0.0306123	0.910083	0.445868	2.04115	0.041236	0.38371
CCNB2	57.0291	0.582192	0.403641	1.44235	0.149204	0.677112	0.920794	0.402473	2.28784	0.0221468	0.172818	0.974872	0.402923	2.4195	0.0155419	0.217577
CCNC	16.4268	0.902314	0.663316	1.36031	0.173733	0.703944	0.782552	0.676044	1.15755	0.247049	0.567369	-0.702551	0.716306	-0.980798	0.326692	0.817923
CCND1	6.67008	-0.951716	0.569289	-1.67176	0.0945709	0.598951	-1.18658	0.59674	-1.98844	0.0467629	0.252524	-0.474832	0.580901	-0.817407	0.413696	0.8617
CCND2	4.79144	-1.76411	1.05149	-1.67772	0.0934014	0.598008	1.83758	0.821624	2.23653	0.0253172	0.187332	-0.603365	0.958377	-0.629569	0.528976	0.886115
CCND3	15.7445	-0.639571	0.658065	-0.971896	0.331102	0.825573	-1.02549	0.671891	-1.52627	0.126943	0.428207	-0.674501	0.676279	-0.997371	0.318585	0.811434
CCNE2	26.9817	-0.897582	0.382396	-2.34726	0.0189123	0.327196	-0.870499	0.397273	-2.19119	0.0284383	0.202404	-0.288832	0.376546	-0.767055	0.443049	0.8617
CCNF	37.9707	0.244798	0.265088	0.92346	0.355768	0.835504	-0.086202	0.26942	-0.319955	0.749003	0.902799	0.697557	0.265664	2.62571	0.00864691	0.155828
CCNG1	872.925	0.702295	0.400853	1.752	0.0797734	0.577228	1.37083	0.400711	3.421	0.000623914	0.01456	0.322934	0.392082	0.82364	0.410144	0.8617
CCNG2	20.7923	-0.746516	0.48388	-1.54277	0.122886	0.63685	-0.04164	0.492538	-0.0845417	0.932626	0.97606	-1.23	0.538449	-2.28434	0.0223516	0.258779
CCNH	609.874	0.100825	0.203652	0.495088	0.620538	0.911547	0.446747	0.203515	2.19516	0.0281524	0.200959	0.282086	0.19963	1.41304	0.157643	0.65093
CCP110	156.287	0.511544	0.262714	1.94715	0.051517	0.500307	0.534173	0.261867	2.03986	0.041364	0.243796	0.508077	0.258579	1.96489	0.0494275	0.417429
CCR1	0.274884	-1.20941	9.22474	-0.131106	0.895692		0	9.21431	0	1		1.50001	8.99089	0.166837	0.867498
CCR2	0.3175	0	9.22474	0	1		-1.41644	9.21419	-0.153724	0.877828		-0.688499	9.01264	-0.0763926	0.939107
CCR5	0.32852	-2.19199	8.80444	-0.248964	0.803389		-0.456298	8.80022	-0.0518508	0.958648		-0.688458	8.60688	-0.0799893	0.936246
CCR7	0.325968	-1.52698	8.88819	-0.171799	0.863595		-1.4165	8.88565	-0.159415	0.873342		-0.284346	8.69015	-0.0327205	0.973897
CCT5	5008.7	0.183764	0.0896656	2.04944	0.0404193	0.448017	0.29366	0.089523	3.28027	0.00103708	0.0209749	0.236734	0.0877095	2.69906	0.00695349	0.144243
CCT6A	5837.47	0.270717	0.169097	1.60095	0.109387	0.613902	0.30357	0.169077	1.79546	0.0725812	0.326898	0.401309	0.165289	2.42792	0.0151858	0.217131
CCT7	1243.07	0.295526	0.199361	1.48236	0.138244	0.663815	0.307814	0.199372	1.54392	0.122608	0.421523	0.289133	0.195404	1.47967	0.138962	0.619445
CD14	1.97845	2.25122	1.06329	2.11722	0.0342408	0.412503	1.74414	1.08133	1.61296	0.106753	0.391119	0.68436	1.19186	0.574195	0.565836	0.895898
CD163	0.336019	0	9.22474	0	1		0	9.21431	0	1		-2.90415	9.0004	-0.322669	0.746946
CD19	2.45909	-1.93989	1.24831	-1.55401	0.120183	0.63685	-1.10373	1.17129	-0.942314	0.346032	0.660755	-0.37708	1.10314	-0.341824	0.732483	0.951072
CD2	0.373485	-0.140538	6.74185	-0.0208456	0.983369		0.201136	6.71051	0.0299733	0.976088		1.23694	6.60564	0.187256	0.85146
CD24	74.7738	-0.159457	0.2984	-0.534373	0.593083	0.898908	0.0401	0.299182	0.134032	0.893377	0.964745	-0.115298	0.299629	-0.384804	0.700382	0.941293
CD27	0.450578	-2.67602	3.39608	-0.787973	0.430712		-1.0927	3.41011	-0.32043	0.748643		-0.68849	3.34034	-0.206114	0.836702
CD320	414.816	0.177492	0.179601	0.988254	0.323028	0.825573	0.236464	0.179534	1.3171	0.187806	0.50928	0.420706	0.175993	2.39046	0.0168272	0.226863
CD34	0.258118	2.48742	9.17425	0.27113	0.786291		0	9.21431	0	1		0.273236	9.01264	0.030317	0.975814
CD36	0.420443	-2.46452	4.94699	-0.498186	0.618353		-1.09041	4.95762	-0.219947	0.825913		-1.24437	4.84441	-0.256867	0.797281
CD37	0.137964	1.41447	9.20176	0.153718	0.877832		0	9.21431	0	1		0	9.01264	0	1
CD3D	0.596676	0.393544	3.67341	0.107133	0.914683		-2.17894	3.66147	-0.595099	0.551777		2.1013	3.48557	0.602857	0.546604
CD3E	0.512458	1.10333	3.49512	0.315678	0.752247		-1.41707	3.63631	-0.389699	0.696759		-2.73397	3.52518	-0.775556	0.438011
CD4	2.4177	-0.399813	1.20941	-0.330586	0.740957	0.944401	-0.558686	1.18699	-0.470676	0.637872	0.847618	-2.21208	1.44693	-1.52881	0.126312	0.602918
CD40	0.344286	1.73481	6.70173	0.25886	0.795743		2.27965	6.69517	0.340493	0.733486		-0.924978	6.6074	-0.139991	0.888667
CD44	0.5786	-1.20944	4.6057	-0.262596	0.792862		-2.6786	4.58377	-0.584367	0.558974		-0.63664	4.49625	-0.141593	0.887401
CD48	0
CD52	0.626977	-1.20943	4.24729	-0.284753	0.775834		-0.129096	4.24627	-0.0304022	0.975746		-0.957492	4.14941	-0.230754	0.817506
CD55	403.334	-0.291916	0.151882	-1.92199	0.0546066	0.505936	-0.142382	0.151502	-0.939798	0.347321	0.662695	0.218733	0.148101	1.47691	0.139699	0.620329
CD58	90.4977	0.00884633	0.234389	0.0377422	0.969893	0.998359	0.324238	0.233436	1.38898	0.164839	0.479324	-0.00607975	0.233974	-0.0259848	0.979269	0.996952
CD69	0.631479	-2.36293	3.56024	-0.663699	0.506883		1.74775	3.43749	0.508439	0.611145		-1.64602	3.46681	-0.474796	0.634933
CD74	1.45008	0.576744	1.22525	0.470717	0.637843	0.912991	0.107083	1.31565	0.0813917	0.93513	0.977417	-1.82147	1.64308	-1.10857	0.267616
CD79A	0.266129	1.5542	9.19693	0.168991	0.865804		-2.04661	9.21135	-0.222184	0.824171		0.53554	9.01264	0.059421	0.952617
CD80	0.166399	-0.888822	9.22474	-0.096352	0.923241		-2.28457	9.20861	-0.24809	0.804065		-1.79419	9.00965	-0.199141	0.842153
CD86	0.0414331	0	9.22474	0	1		0	9.21431	0	1		-0.688499	9.01264	-0.0763926	0.939107
CD8A	1.89279	0.370619	0.818787	0.452644	0.650805	0.91675	-0.198991	0.962513	-0.206741	0.836212	0.944375	-1.00428	1.26176	-0.795939	0.426067	0.8617
CD9	0.0415244	1.63857	9.19423	0.178217	0.858552		0.51135	9.21431	0.0554952	0.955744		0	9.01264	0	1
CDA	0.401796	2.26012	7.46741	0.302664	0.762146		0	7.51851	0	1		-0.6856	7.32621	-0.0935818	0.925441
CDC16	444.014	0.193	0.180401	1.06983	0.284694	0.807644	0.277589	0.180167	1.54073	0.123383	0.422355	0.242903	0.178079	1.36402	0.172562	0.662698
CDC20	103.875	0.0455211	0.514344	0.0885032	0.929477	0.987864	0.769443	0.509012	1.51164	0.130625	0.433689	1.55379	0.495983	3.13275	0.00173178	0.0569958
CDC25A	12.812	-0.341432	0.543677	-0.628005	0.530001	0.884359	0.334113	0.512429	0.652018	0.51439	0.785003	0.878276	0.505737	1.73663	0.0824534	0.518344
CDC25B	9.78677	-0.296536	0.489146	-0.606233	0.54436	0.886579	0.767194	0.485933	1.57881	0.11438	0.406444	1.27699	0.528355	2.41692	0.0156523	0.217577
CDC26	172.058	0.207801	0.386948	0.537024	0.591251	0.898908	0.218616	0.388154	0.563221	0.573284	0.814614	-0.550207	0.3827	-1.4377	0.15052	0.634802
CDC42	2100.74	0.471478	0.413708	1.13964	0.254437	0.786208	0.383285	0.413798	0.926263	0.35431	0.667631	-0.202714	0.404528	-0.501113	0.616291	0.920182
CDC45	62.1015	-0.360735	0.424062	-0.850665	0.394955	0.838369	-1.30879	0.433179	-3.02136	0.00251645	0.0396352	0.0196956	0.412627	0.0477323	0.96193	0.992709
CDC6	24.7315	0.0291333	0.397621	0.0732692	0.941592	0.992143	-0.274874	0.424428	-0.647634	0.517222	0.78614	0.608209	0.392229	1.55065	0.120986	0.593509
CDC7	14.7331	0.448321	0.620396	0.722637	0.469903	0.871661	0.220982	0.629348	0.351129	0.725492	0.893848	0.93227	0.619127	1.50578	0.132123	0.612863
CDCA3	98.1671	-0.324622	0.258873	-1.25398	0.209848	0.744007	1.31818	0.242753	5.43015	5.63069e-08	4.8806e-06	1.31747	0.231626	5.68794	1.28581e-08	1.69273e-06
CDCA4	15.0534	0.802882	0.400872	2.00284	0.0451945	0.474851	0.149542	0.413265	0.361855	0.717461	0.889612	0.771155	0.418234	1.84383	0.0652073	0.479747
CDCA5	17.1847	0.419373	0.578318	0.72516	0.468354	0.871661	0.817739	0.601295	1.35996	0.173841	0.489458	0.599096	0.582937	1.02772	0.304082	0.808236
CDCA7	2.19532	0.545653	1.01315	0.538569	0.590184	0.898908	0.655878	1.15462	0.568044	0.570005	0.812332	-1.9085	1.40854	-1.35495	0.175432	0.664616
CDCA8	5.70026	-1.55423	0.916857	-1.69517	0.0900438	0.594355	1.34997	0.846552	1.59467	0.110786	0.398056	2.41201	0.824617	2.92501	0.00344446	0.0926205
CDH1	0.931691	-0.0459913	2.03285	-0.0226241	0.98195		0.0675451	1.98973	0.0339469	0.972919	0.988237	-2.18264	2.17643	-1.00285	0.315932
CDH10	14.9313	-1.06616	0.51487	-2.07073	0.0383841	0.43366	-1.42091	0.527339	-2.69448	0.00704983	0.0822593	-0.747146	0.504085	-1.48218	0.138292	0.618025
CDH11	16.831	-0.646346	0.501337	-1.28924	0.197313	0.725268	-0.393409	0.479481	-0.82049	0.411937	0.706033	0.113108	0.466317	0.242557	0.808349	0.972104
CDH2	10286.9	-0.219457	0.371704	-0.590407	0.554918	0.891666	-1.02016	0.371731	-2.74435	0.00606301	0.0754611	-0.223662	0.363146	-0.615902	0.537959	0.889359
CDH3	0.280129	1.32373	5.41423	0.244491	0.806851		-0.769779	5.46406	-0.14088	0.887965		1.23582	5.30386	0.233004	0.815758
CDH5	2.89308	-0.0852564	1.01822	-0.0837311	0.93327	0.989056	-1.28318	0.951991	-1.34789	0.177694	0.496275	-0.355481	0.925081	-0.38427	0.700778	0.941293
CDH6	0.0407068	0	9.22474	0	1		0	9.21431	0	1		0	9.01264	0	1
CDH7	2.67977	0.587135	1.20592	0.486879	0.626344	0.911547	0.190238	1.13356	0.167823	0.866723	0.95726	0.521279	1.11285	0.468418	0.639486	0.923447
CDH8	0.195317	-1.20941	9.22474	-0.131106	0.895692		-1.08979	9.21431	-0.118272	0.905852		-0.958145	9.01254	-0.106312	0.915334
CDK1	150.297	0.238317	0.491077	0.485296	0.627466	0.911547	1.88779	0.489674	3.85519	0.00011564	0.00369288	0.86553	0.478636	1.80833	0.0705556	0.493688
CDK13	2.65066	0.799294	0.993369	0.80463	0.421033	0.852379	-0.0954942	1.0591	-0.0901652	0.928156	0.974854	-0.269392	1.07971	-0.249505	0.80297	0.970852
CDK19	204.066	0.0594866	0.200174	0.297174	0.766334	0.950951	-0.00966139	0.198409	-0.0486943	0.961163	0.984411	0.713663	0.19296	3.6985	0.000216881	0.0115566
CDK2	21.5665	0.323044	0.513986	0.628507	0.529672	0.884359	0.0405748	0.521506	0.0778031	0.937985	0.978293	-0.0860574	0.520137	-0.165452	0.868589	0.983757
CDK4	4007.4	-0.316858	0.238091	-1.33083	0.183246	0.715918	-0.182749	0.238045	-0.767709	0.44266	0.732615	0.118223	0.23251	0.508467	0.611126	0.919771
CDK5	226.923	-0.189943	0.287026	-0.661764	0.508122	0.87306	-0.279652	0.288856	-0.968136	0.332976	0.64599	-0.365849	0.284705	-1.28501	0.198789	0.696664
CDK5R1	1186.04	-0.489573	0.630221	-0.776827	0.437261	0.853589	-1.3644	0.630422	-2.16427	0.0304439	0.209321	-0.27059	0.615648	-0.439521	0.660284	0.929135
CDK6	166.392	-0.21514	0.29373	-0.73244	0.4639	0.870407	-0.0515166	0.291321	-0.176838	0.859636	0.956596	0.713176	0.283878	2.51226	0.0119959	0.193143
CDK7	466.64	-0.115835	0.147627	-0.784649	0.43266	0.853589	0.00136525	0.147951	0.00922775	0.992637	0.996021	-0.0324869	0.145779	-0.22285	0.823652	0.973301
CDKN1A	4.93446	-0.538253	0.862403	-0.624131	0.532541	0.885388	2.53649	0.842684	3.01001	0.00261238	0.0406427	-0.212777	1.00459	-0.211804	0.83226	0.973926
CDKN1B	361.458	0.21682	0.167914	1.29126	0.196614	0.724844	-0.00134317	0.168175	-0.00798673	0.993628	0.99609	0.241524	0.167011	1.44616	0.148133	0.63027
CDKN2A	0.244507	-3.51694	9.20911	-0.381898	0.702537		-1.08992	9.21431	-0.118286	0.905841		-0.688499	9.01264	-0.0763926	0.939107
CDKN3	82.5888	0.616525	0.468004	1.31735	0.187721	0.721118	1.96851	0.463782	4.24448	2.19102e-05	0.00090129	0.650112	0.458368	1.41832	0.156098	0.647661
CDT1	53.7267	-0.0951625	0.307773	-0.309197	0.757172	0.948823	-0.191351	0.304895	-0.627597	0.530268	0.792464	0.438517	0.29413	1.4909	0.135988	0.615911
CEACAM6	0
CEBPA	9.29737	-0.248485	0.648353	-0.383256	0.70153	0.932457	0.133556	0.627332	0.212895	0.831409	0.944375	0.0944799	0.668698	0.141289	0.887641	0.983757
CEBPB	59.6825	1.19525	0.771355	1.54955	0.121251	0.63685	1.95505	0.744113	2.62736	0.00860504	0.0953627	0.903252	0.749683	1.20485	0.228263	0.736099
CEBPD	8.70536	-0.145501	0.736269	-0.197619	0.843343	0.970751	1.13351	0.703719	1.61074	0.107237	0.391375	-0.582829	0.738637	-0.78906	0.430077	0.8617
CEBPZ	510.861	0.249875	0.187406	1.33333	0.182422	0.715608	0.292305	0.186862	1.56428	0.117751	0.413438	0.307866	0.183582	1.67699	0.0935446	0.543773
CEL	49.5971	0.612215	0.64595	0.947775	0.343244	0.829551	-0.295777	0.649444	-0.455431	0.648799	0.852999	-0.0235758	0.63317	-0.0372346	0.970298	0.993077
CENPA	2.79954	0.854631	1.00173	0.853153	0.393574	0.838369	2.46349	1.05473	2.33566	0.0195088	0.160041	2.9574	1.07032	2.76311	0.00572536	0.130749
CENPE	2.14504	1.72005	1.22594	1.40305	0.160603	0.688914	-0.578042	1.32981	-0.434679	0.663796	0.859217	1.28982	1.0868	1.1868	0.235305	0.746647
CENPF	28.9513	0.703297	0.399136	1.76205	0.0780616	0.570221	1.42014	0.397461	3.57301	0.000352895	0.00951675	1.50378	0.381175	3.94512	7.97605e-05	0.00457703
CENPH	339.881	-0.185769	0.168261	-1.10405	0.269571	0.797127	-0.401508	0.169002	-2.37576	0.0175128	0.151798	-0.0892014	0.161361	-0.552806	0.580396	0.901596
CENPK	362.461	-0.267203	0.186859	-1.42997	0.152725	0.677112	-0.13115	0.186172	-0.704453	0.481151	0.759783	0.215776	0.179658	1.20103	0.229739	0.738729
CENPU	565.926	-0.0180536	0.21006	-0.0859449	0.93151	0.989056	0.157972	0.210096	0.751905	0.452108	0.7389	0.375928	0.205907	1.82571	0.0678936	0.487006
CENPW	361.877	0.29253	0.165783	1.76453	0.0776422	0.570221	0.209486	0.166869	1.25539	0.209337	0.532042	0.136358	0.166134	0.820773	0.411776	0.8617
CEP55	35.3315	-0.632517	0.385554	-1.64054	0.100893	0.60503	0.855497	0.361213	2.3684	0.0178653	0.153212	1.10704	0.34299	3.22762	0.00124825	0.0429781
CEP57	432.03	-0.294123	0.307579	-0.956252	0.338945	0.828812	-0.533691	0.308128	-1.73204	0.0832662	0.352068	-0.253573	0.300005	-0.845229	0.397983	0.858524
CER1	0.101026	0	9.22474	0	1		-1.09002	9.21431	-0.118297	0.905832		-1.22768	9.01223	-0.136223	0.891645
CERK	1.33022	-0.506101	1.53926	-0.328794	0.742311	0.944401	-0.969473	1.60462	-0.604175	0.545728	0.799807	-1.50754	1.56466	-0.963495	0.335299
CES1	1.26448	-3.26229	1.68016	-1.94165	0.0521791	0.500307	-0.607772	1.48391	-0.409575	0.682118	0.870066	-0.111322	1.35114	-0.082391	0.934336
CES2	14.7863	-1.07749	0.56933	-1.89256	0.0584159	0.510903	0.0907213	0.53471	0.169664	0.865274	0.95726	0.237416	0.532279	0.446038	0.65557	0.927999
CETN3	327.075	0.401966	0.295146	1.36192	0.173223	0.703944	0.745919	0.29486	2.52974	0.0114148	0.114007	0.287744	0.288759	0.996487	0.319013	0.811434
CFAP221	0.847812	-0.617414	2.30119	-0.268303	0.788466		-0.950037	2.0234	-0.469526	0.638694	0.847618	-1.44636	2.21764	-0.652207	0.514267
CFB	0.462393	0	4.83217	0	1		0.524439	4.74384	0.110552	0.911972		0.709418	4.67652	0.151698	0.879425
CFH	0.399579	0.39354	4.48953	0.0876573	0.930149		-3.05417	4.46017	-0.684765	0.493492		-1.50343	4.38386	-0.342946	0.731639
CFHR1	0.796068	-0.877176	3.44411	-0.254689	0.798964		0.650853	3.46864	0.187639	0.851159	0.951432	-2.00737	3.50742	-0.572322	0.567104
CFL2	138.539	-0.269572	0.167342	-1.61091	0.1072	0.609057	-0.0896853	0.169326	-0.52966	0.596348	0.825557	-0.344196	0.166968	-2.06146	0.0392594	0.373883
CFLAR	1.61801	-0.181349	1.24614	-0.145528	0.884294	0.979031	2.56579	1.15327	2.22479	0.0260951	0.192501	-0.772171	1.63927	-0.471046	0.637608	0.923447
CGA	0.429495	0.0729356	6.00202	0.0121518	0.990304		-1.82145	5.99691	-0.303731	0.761333		-2.24455	5.85299	-0.383487	0.701358
CGN	0.52775	2.33782	3.76778	0.620478	0.534943		0.615154	3.78989	0.162314	0.871058		-1.33328	3.77518	-0.35317	0.723961
CGRRF1	9.52405	0.357752	0.790411	0.452615	0.650826	0.91675	1.17179	0.81467	1.43836	0.150331	0.461803	-0.733767	0.88021	-0.833627	0.404491	0.8617
CHAC1	26.7564	1.23148	0.436181	2.82332	0.00475298	0.145683	2.08479	0.428168	4.86909	1.12113e-06	7.16045e-05	0.557309	0.488392	1.14111	0.253824	0.774624
CHAC2	57.5103	-0.254664	0.363004	-0.701546	0.482963	0.871661	0.163417	0.361715	0.451785	0.651424	0.854284	-0.155456	0.350872	-0.443056	0.657725	0.92863
CHAT	2.56408	-0.521434	1.25107	-0.416791	0.676831	0.922077	-0.179091	1.14392	-0.156559	0.875592	0.960697	-1.02769	1.33981	-0.767039	0.443058	0.8617
CHEK1	243.786	0.0838245	0.164576	0.509335	0.610517	0.902828	-0.0172736	0.165631	-0.10429	0.916939	0.97222	0.296759	0.162824	1.82257	0.0683687	0.488847
CHEK2	8.02092	-2.38093	0.791811	-3.00694	0.00263895	0.101204	0.404485	0.617251	0.655302	0.512273	0.783914	-0.0829419	0.63675	-0.130258	0.896362	0.983757
CHERP	165.553	0.323583	0.283589	1.14103	0.253859	0.786208	0.412156	0.282438	1.45928	0.144489	0.454242	0.355169	0.274817	1.29238	0.196226	0.694036
CHIC2	125.628	0.213892	0.210262	1.01726	0.309028	0.820497	-0.024107	0.210431	-0.11456	0.908794	0.966963	0.109334	0.20359	0.537031	0.591247	0.910615
CHKA	215.867	0.966526	0.226636	4.26466	2.00208e-05	0.00287924	0.496932	0.227466	2.18464	0.0289151	0.204597	0.512698	0.224076	2.28805	0.0221346	0.258779
CHMP2B	14.2327	-0.0829166	0.481056	-0.172364	0.863152	0.973049	-0.196287	0.523575	-0.374897	0.707737	0.884489	-0.343681	0.480596	-0.715113	0.474539	0.866778
CHMP4A	1508.85	-0.230555	0.420292	-0.548559	0.583308	0.896588	-0.559371	0.420318	-1.33083	0.183246	0.501396	-0.119891	0.410488	-0.292069	0.770234	0.959571
CHMP4C	1.71221	-0.67505	1.39702	-0.483208	0.628948	0.911547	-1.5146	1.56143	-0.970004	0.332045	0.645006	-0.449799	1.26373	-0.35593	0.721893	0.946919
CHMP6	137.647	-0.186447	0.508055	-0.366983	0.713632	0.9347	-0.304372	0.507587	-0.599644	0.548743	0.802289	0.00142247	0.496445	0.00286532	0.997714	0.999199
CHN1	108.415	0.494589	0.343393	1.4403	0.149782	0.677112	0.966964	0.344632	2.80579	0.00501933	0.0641153	0.0772214	0.34011	0.227049	0.820386	0.973301
CHP1	50.7479	0.140482	0.325631	0.431415	0.666167	0.920126	-0.553302	0.334512	-1.65406	0.0981159	0.377322	0.209947	0.335621	0.625547	0.531612	0.88794
CHRNA2	0.591181	-0.65122	2.07888	-0.313255	0.754087		1.34596	2.09895	0.64125	0.52136		0.425763	2.14111	0.198851	0.842379
CHRNA4	25.1305	-0.249314	0.499621	-0.499006	0.617775	0.909469	-1.67291	0.518278	-3.22782	0.00124739	0.0236517	-0.643531	0.504476	-1.27564	0.202082	0.703358
CHRNB2	50.1068	-0.721256	0.312561	-2.30756	0.0210234	0.343084	-0.198151	0.294262	-0.673384	0.500703	0.776986	0.293139	0.284843	1.02912	0.303421	0.808236
CHST11	36.3811	0.307179	0.303707	1.01143	0.311811	0.820497	0.218148	0.30412	0.71731	0.473183	0.75753	0.166134	0.303543	0.547316	0.584162	0.905283
CHST13	0.14851	0	9.22474	0	1		-1.08903	9.21133	-0.118227	0.905887		-0.958102	9.01254	-0.106308	0.915338
CHUK	32.2802	0.660208	0.559516	1.17996	0.238015	0.774735	0.718959	0.564586	1.27343	0.202867	0.526129	0.553993	0.556238	0.995964	0.319268	0.811434
CIAPIN1	55.5021	-0.122157	0.317521	-0.38472	0.700445	0.932457	0.33708	0.314334	1.07236	0.283558	0.60052	0.306814	0.310474	0.988212	0.323049	0.81234
CIB1	39.1575	-0.159053	0.433595	-0.366824	0.713751	0.9347	0.0788571	0.436587	0.180622	0.856665	0.954603	-0.367086	0.459047	-0.79967	0.423902	0.8617
CIDEC	0.489113	-0.153069	4.77677	-0.0320445	0.974437		1.19623	4.86572	0.245849	0.805799		1.23507	4.73334	0.26093	0.794146
CIRBP	26.0827	-0.167158	0.427118	-0.391362	0.69553	0.931571	-0.0405423	0.444997	-0.091107	0.927408	0.974854	-0.221861	0.455926	-0.486617	0.62653	0.92309
CISD1	48.1245	0.483993	0.438649	1.10337	0.269866	0.797127	0.700534	0.443027	1.58124	0.113822	0.405054	-0.36291	0.465029	-0.780403	0.435154	0.8617
CIT	15.4698	0.0057719	0.827829	0.00697234	0.994437	0.998521	0.608917	0.779646	0.781018	0.434792	0.726249	0.416345	0.739168	0.563261	0.573257	0.897641
CITED2	29.5168	-1.44022	0.659459	-2.18394	0.028967	0.382689	-0.459282	0.644146	-0.71301	0.47584	0.759279	-0.452733	0.642717	-0.704404	0.481181	0.86913
CKS1B	109.271	0.449291	0.406451	1.1054	0.268986	0.797127	0.673909	0.408162	1.65108	0.0987224	0.377322	0.480095	0.402175	1.19375	0.232577	0.741879
CKS2	756.953	0.155407	0.386554	0.402033	0.687659	0.926408	0.932168	0.386584	2.4113	0.015896	0.143953	0.102564	0.378576	0.270921	0.786452	0.963898
CLDN1	0.0761168	0	9.22474	0	1		-0.769456	9.21431	-0.0835066	0.933449		-0.935299	9.01256	-0.103777	0.917346
CLDN2	0.128718	0	9.22474	0	1		0.190969	9.21431	0.0207253	0.983465		0.0337883	9.01257	0.00374902	0.997009
CLDN20	0.520836	-2.40428	3.42438	-0.702108	0.482612		-0.108689	3.3159	-0.032778	0.973852		1.69666	3.22514	0.526073	0.598838
CLDN3	0.193317	0	9.22474	0	1		0	9.21431	0	1		-1.62681	9.0107	-0.180542	0.856727
CLDN5	30.1839	-1.14771	0.407685	-2.81517	0.00487508	0.145683	-1.0544	0.417136	-2.5277	0.0114812	0.1142	0.0242371	0.396568	0.0611171	0.951266	0.992334
CLDN7	0.155818	0	9.22474	0	1		1.18735	9.20434	0.128999	0.897359		-1.24607	9.01221	-0.138264	0.890032
CLEC4A	12.456	0.733138	0.474274	1.54581	0.12215	0.63685	0.435925	0.491019	0.887797	0.37465	0.681105	0.0767222	0.527999	0.145308	0.884468	0.983757
CLEC7A	0.710992	-2.05873	2.55292	-0.806422	0.419999		-0.833797	2.46305	-0.338523	0.734969		-2.73318	2.46798	-1.10746	0.268096
CLIC4	1597.85	0.0266037	0.133895	0.198691	0.842504	0.970751	0.141434	0.133532	1.05918	0.289518	0.605412	0.20726	0.130688	1.58592	0.112757	0.584934
CLK1	161.011	0.655359	0.550381	1.19074	0.233757	0.773422	0.340266	0.552192	0.616209	0.537756	0.795776	-0.317411	0.542352	-0.585248	0.558381	0.894275
CLK2	498.1	-0.201628	0.194983	-1.03408	0.301097	0.820497	-0.0845321	0.193924	-0.435902	0.662908	0.859217	0.123399	0.189971	0.649565	0.515973	0.878993
CLPX	50.3108	0.466854	0.403629	1.15664	0.247419	0.783097	0.834595	0.406889	2.05116	0.0402514	0.24121	0.569312	0.409918	1.38884	0.16488	0.660049
CLSTN1	615.451	0.146103	0.211724	0.690063	0.490155	0.872575	-0.203059	0.211398	-0.960552	0.336777	0.651282	0.418763	0.206601	2.02692	0.0426708	0.3882
CLTB	392.21	-0.24381	0.323636	-0.753347	0.451241	0.86238	-0.658253	0.323515	-2.03469	0.0418821	0.243796	-0.21759	0.315459	-0.689756	0.490348	0.871683
CLTC	263.525	0.387541	0.372535	1.04028	0.29821	0.817855	0.296992	0.373057	0.796103	0.425972	0.718937	0.337453	0.367354	0.918604	0.358303	0.837866
CLU	7.84996	-0.25806	0.744972	-0.346402	0.72904	0.939788	-0.448744	0.739139	-0.607117	0.543773	0.798675	0.0989598	0.717251	0.137971	0.890263	0.983757
CMPK2	1.85318	0.333061	1.12321	0.296526	0.766829	0.950951	0.421164	1.15866	0.363494	0.716236	0.889159	0.67094	1.15772	0.579538	0.562226	0.894923
CMSS1	227.678	0.50175	0.40351	1.24346	0.213697	0.751775	0.703119	0.404144	1.73977	0.0818986	0.348716	0.113977	0.398997	0.285658	0.77514	0.960328
CMTM2	0.381836	-1.89637	6.65248	-0.285062	0.775597		0	6.66265	0	1		0.00377763	6.51316	0.000579999	0.999537
CNDP2	1.99984	0.632101	1.23675	0.511098	0.609282	0.9026	-0.609954	1.22289	-0.498781	0.617933	0.838705	0.833737	1.32345	0.629973	0.528712	0.886115
CNKSR3	27.7711	0.0854276	0.352532	0.242326	0.808527	0.962206	-0.620366	0.36362	-1.70608	0.0879924	0.362577	-0.419505	0.369599	-1.13503	0.256363	0.775308
CNN1	2.74886	-0.476422	1.28179	-0.371685	0.710127	0.934059	-3.21031	1.63291	-1.966	0.0492981	0.260101	1.0961	1.15766	0.946829	0.343726	0.830795
CNN3	5814.58	0.143277	0.125788	1.13904	0.254688	0.786208	-0.0173199	0.125798	-0.13768	0.890493	0.964745	0.105669	0.123049	0.858753	0.390477	0.853224
CNOT4	294.995	0.0160965	0.171019	0.0941214	0.925013	0.986309	-0.28343	0.170175	-1.66552	0.09581	0.37505	0.312758	0.166571	1.87763	0.0604319	0.47289
CNPY2	3.72329	-0.816313	0.856466	-0.953118	0.34053	0.829551	-1.36336	0.896804	-1.52025	0.128449	0.428334	-0.484476	0.894688	-0.541504	0.588161	0.90717
CNPY3	758.336	0.091173	0.143639	0.634739	0.525599	0.882132	-0.116713	0.143452	-0.813605	0.415871	0.710788	0.328885	0.140461	2.34148	0.0192077	0.245478
CNTN1	18.8114	-0.058701	0.443804	-0.132268	0.894772	0.979283	-0.622125	0.444449	-1.39977	0.161583	0.475925	0.1732	0.428685	0.404026	0.686193	0.935355
COA6	130.614	0.624199	0.506143	1.23325	0.217484	0.757081	0.856735	0.508069	1.68626	0.0917459	0.368078	-0.200696	0.500711	-0.400823	0.688551	0.936195
COASY	30.2821	0.0333295	0.350955	0.094968	0.92434	0.986309	0.0462835	0.347526	0.13318	0.894051	0.964745	0.338124	0.358585	0.942939	0.345712	0.830795
COG2	256.98	0.312919	0.162709	1.92319	0.0544565	0.505936	0.33996	0.161247	2.10832	0.0350034	0.230851	0.36288	0.15805	2.29599	0.0216765	0.256678
COG4	347.52	0.112348	0.130524	0.860746	0.389378	0.838369	0.0760501	0.129638	0.586636	0.557448	0.806803	0.315029	0.128283	2.45573	0.0140598	0.213258
COG7	1.43659	0.754534	1.5477	0.487519	0.62589	0.911547	-2.64401	1.83066	-1.44429	0.148657	0.460549	-0.470429	1.54474	-0.304536	0.76072
COIL	296.241	0.348064	0.141108	2.46665	0.0136384	0.273713	0.261742	0.140915	1.85745	0.0632472	0.300319	0.156684	0.138572	1.13071	0.258179	0.775308
COL10A1	0.520299	-2.53968	6.6599	-0.381338	0.702952		-2.79718	6.64993	-0.420633	0.674023		-2.02575	6.50957	-0.311196	0.755651
COL11A1	3.51509	-1.41921	0.838081	-1.6934	0.090379	0.594355	0.299607	0.718414	0.41704	0.676649	0.865241	-0.25506	0.752868	-0.338784	0.734773	0.951633
COL12A1	0.885017	2.53132	2.11937	1.19437	0.232332		-1.41587	2.39011	-0.592388	0.55359	0.80338	-0.452329	2.23589	-0.202303	0.83968
COL15A1	0.573765	-0.88884	4.16126	-0.213599	0.83086		-2.1061	4.15228	-0.507216	0.612003		0.463306	3.94951	0.117307	0.906616
COL16A1	35.9222	0.292573	0.329126	0.888937	0.374037	0.838369	0.554257	0.321375	1.72464	0.0845922	0.354705	0.584639	0.314498	1.85896	0.0630327	0.476233
COL1A1	15.7844	-0.0963889	0.449943	-0.214225	0.830372	0.968652	-0.397331	0.443428	-0.896044	0.37023	0.676885	0.844008	0.445262	1.89553	0.0580221	0.460474
COL1A2	9.93961	-0.92585	0.611135	-1.51497	0.12978	0.651757	-0.109239	0.531625	-0.205481	0.837196	0.944375	-1.26027	0.587183	-2.1463	0.031849	0.325471
COL2A1	3.74154	-0.619004	1.084	-0.571036	0.567976	0.895958	0.515352	1.04422	0.493531	0.621638	0.839658	0.59859	1.03541	0.578117	0.563185	0.895176
COL3A1	0.38707	0	6.75341	0	1		0.638688	6.6793	0.095622	0.923821		1.73134	6.53703	0.264851	0.791124
COL4A1	4.86675	0.481259	0.765135	0.628987	0.529358	0.884359	-1.01378	0.791185	-1.28134	0.200074	0.523818	-0.0975458	0.726201	-0.134323	0.893147	0.983757
COL4A2	5.17929	0.0842972	0.807896	0.104342	0.916898	0.984818	0.710054	0.712848	0.996081	0.319211	0.635541	0.256952	0.780559	0.32919	0.742012	0.953232
COL4A3BP	159.623	0.12206	0.260362	0.46881	0.639206	0.912991	-0.316224	0.262141	-1.20631	0.227696	0.547147	0.206066	0.257787	0.799364	0.42408	0.8617
COL5A1	8.51921	0.415695	0.665291	0.624832	0.532081	0.885388	0.0848098	0.641755	0.132153	0.894863	0.964745	0.642616	0.605433	1.06142	0.2885	0.796
COL5A2	1.98191	-1.70091	1.46819	-1.15851	0.246657	0.782541	-2.54229	1.67688	-1.51609	0.129497	0.431124	0.325863	1.27373	0.255834	0.798079	0.969127
COL5A3	0.262913	0	9.22474	0	1		-1.41662	9.21419	-0.153743	0.877812		-0.426196	9.01264	-0.0472886	0.962283
COL6A3	1.6087	0.213211	1.25771	0.169523	0.865385	0.973688	0.651375	1.38707	0.469606	0.638637	0.847618	-0.906142	1.33719	-0.677644	0.497997	0.875092
COL8A2	0.927376	-0.0288389	2.3031	-0.0125218	0.990009		0.255029	2.36374	0.107892	0.914081	0.970462	1.04967	2.25894	0.464676	0.642163
COMT	168.565	0.090849	0.153696	0.591094	0.554458	0.891549	0.38849	0.153323	2.53381	0.0112831	0.113158	0.266657	0.157093	1.69744	0.0896132	0.537064
COPA	50.9674	0.00800805	0.320366	0.0249966	0.980058	0.998359	-0.218326	0.327629	-0.666383	0.505166	0.779427	0.213523	0.322337	0.662422	0.507701	0.878662
COPB2	56.1658	0.226205	0.388316	0.582529	0.560211	0.89287	0.0977509	0.387766	0.252087	0.800973	0.929236	0.129796	0.388139	0.334406	0.738074	0.953216
COPS5	519.643	-0.169444	0.159616	-1.06157	0.288431	0.809223	-0.266817	0.159906	-1.66858	0.0951997	0.375012	-0.342225	0.155674	-2.19834	0.0279248	0.300511
COPS7A	7.08778	-0.273247	0.7169	-0.381151	0.703091	0.932457	-0.288087	0.706322	-0.407869	0.68337	0.870167	0.0067273	0.688586	0.00976973	0.992205	0.998038
COPZ1	339.753	0.297635	0.29128	1.02182	0.306867	0.820497	0.406686	0.291727	1.39406	0.163299	0.476926	0.196413	0.287539	0.68308	0.494556	0.872509
COQ5	70.4905	0.372061	0.30585	1.21648	0.223801	0.769644	0.711199	0.307697	2.31136	0.0208127	0.16616	0.0214181	0.310228	0.0690398	0.944958	0.991475
CORO1A	14.2854	-0.985778	0.532125	-1.85253	0.0639496	0.525725	-1.90857	0.566539	-3.36882	0.000754898	0.0165057	-0.398656	0.529809	-0.752454	0.451778	0.864692
COX6B1	105.027	0.0516505	0.579899	0.089068	0.929028	0.987843	0.654216	0.582531	1.12306	0.261413	0.577953	-0.354192	0.575543	-0.615405	0.538287	0.889359
COX6C	0.943243	-1.28302	2.00696	-0.639285	0.522637		1.64237	1.73546	0.946362	0.343964	0.658858	2.05977	1.69357	1.21623	0.223899
COX8A	281.165	-0.00478373	0.42522	-0.01125	0.991024	0.998521	0.586737	0.425881	1.3777	0.168295	0.482448	0.217145	0.419412	0.517735	0.604643	0.915794
CPA3	0.220019	0	9.22474	0	1		0	9.21431	0	1		-1.52594	9.01133	-0.169335	0.865533
CPNE3	425.443	0.0812596	0.192915	0.42122	0.673595	0.922077	0.0845632	0.192983	0.438191	0.661248	0.859217	0.374118	0.189029	1.97916	0.0477985	0.411435
CPOX	29.2229	0.271711	0.331499	0.819643	0.41242	0.847302	0.112394	0.336784	0.333728	0.738585	0.899418	0.64844	0.356794	1.81741	0.0691549	0.491329
CPS1	15.8191	-0.0132998	0.555012	-0.0239632	0.980882	0.998359	-0.255624	0.574936	-0.444613	0.6566	0.857217	0.11959	0.587642	0.203509	0.838737	0.977843
CPSF4	179.909	-0.827307	0.159162	-5.1979	2.01554e-07	9.27553e-05	-0.35137	0.153662	-2.28665	0.0222164	0.172818	0.09329	0.148588	0.627842	0.530107	0.887345
CPSF4L	0.685727	0.482319	3.08135	0.156528	0.875616		1.50557	3.05021	0.493595	0.621592		-1.46962	3.13033	-0.469479	0.638727
CR1L	0.467757	0	5.88466	0	1		-0.12902	5.88195	-0.0219349	0.9825		1.56086	5.6417	0.276664	0.782038
CRABP2	5.33118	0.0868226	0.862423	0.100673	0.91981	0.985736	-0.426109	0.843636	-0.505086	0.613499	0.835556	-0.971278	0.937949	-1.03553	0.30042	0.807308
CREB1	345.201	-0.409298	0.173247	-2.36251	0.0181518	0.318834	-0.434144	0.172618	-2.51506	0.0119011	0.116467	0.097552	0.167488	0.582442	0.560269	0.894275
CREBBP	49.1663	-0.027775	0.472521	-0.0587804	0.953127	0.995527	-0.363563	0.472192	-0.769947	0.441331	0.732615	0.403399	0.459502	0.877906	0.379995	0.851765
CREBRF	51.004	0.257804	0.267715	0.962981	0.335557	0.827005	0.0341928	0.273327	0.125099	0.900445	0.964745	0.0776643	0.279404	0.277964	0.78104	0.96299
CREG1	27.1859	-0.117401	0.454314	-0.258415	0.796087	0.957836	-0.485632	0.47159	-1.02978	0.303115	0.621334	-0.182194	0.452075	-0.403017	0.686936	0.935704
CRELD2	73.9118	0.14675	0.329221	0.44575	0.655778	0.919527	-0.560108	0.339796	-1.64837	0.0992776	0.378847	-0.203898	0.33385	-0.610749	0.541366	0.889641
CREM	53.4782	0.00119434	0.399327	0.00299088	0.997614	0.998521	0.199684	0.403242	0.495197	0.620461	0.83958	-0.271334	0.407821	-0.665325	0.505843	0.87726
CRIM1	84.7067	0.0488299	0.25132	0.194294	0.845946	0.971042	-0.2177	0.249308	-0.873216	0.382545	0.686714	0.360518	0.241518	1.49272	0.135511	0.615911
CRISP3	2.53028	-4.16657	1.74577	-2.38666	0.0170022	0.314926	-0.24323	1.52354	-0.159648	0.873158	0.959329	-4.63244	1.72221	-2.68983	0.00714885	0.144777
CRK	56.4645	-0.213271	0.447869	-0.47619	0.633939	0.912991	-0.758239	0.449669	-1.68622	0.0917542	0.368078	-0.0116141	0.43866	-0.0264763	0.978877	0.996952
CRKL	164.41	0.469099	0.25814	1.81723	0.0691821	0.548668	0.367457	0.25894	1.41908	0.155875	0.470043	0.159168	0.257444	0.618262	0.536403	0.889359
CRNDE	0.538669	0.495231	5.26714	0.0940228	0.925091		-1.09024	5.37198	-0.20295	0.839174		-0.957808	5.2503	-0.182429	0.855246
CRP	0.368713	0.150314	8.69249	0.0172924	0.986203		-1.08955	8.73736	-0.1247	0.900761		-2.47945	8.53541	-0.29049	0.771442
CRTAM	0.290318	-1.20941	9.22474	-0.131106	0.895692		-2.93412	9.20163	-0.31887	0.749825		-2.03119	9.00768	-0.225495	0.821594
CRTAP	1512.42	-0.0988491	0.104843	-0.942831	0.345767	0.829551	-0.28253	0.104792	-2.6961	0.00701568	0.0822563	0.225031	0.101963	2.20698	0.0273152	0.299664
CRY1	351.247	0.320811	0.143374	2.23758	0.0252483	0.365813	0.171666	0.143906	1.19291	0.232906	0.55418	0.404637	0.141954	2.85048	0.00436527	0.107357
CRYAB	0.839464	-1.20944	2.73514	-0.442185	0.658355		-1.84151	2.69565	-0.683141	0.494517	0.771333	-1.09078	2.55225	-0.427379	0.669104
CRYZ	31.2645	0.434918	0.594291	0.731826	0.464275	0.870407	0.0802983	0.600445	0.133731	0.893615	0.964745	-0.827051	0.600888	-1.37638	0.168703	0.660739
CS	31.5699	0.219077	0.314157	0.697347	0.485586	0.872575	-0.270708	0.323303	-0.837319	0.402413	0.69861	0.543178	0.326574	1.66326	0.0962604	0.552507
CSF1	0.214885	-1.63931	9.2234	-0.177733	0.858932		2.8387	9.15613	0.310033	0.756536		-0.688332	9.01264	-0.076374	0.939122
CSF1R	0.31463	-2.91098	9.21404	-0.315929	0.752056		-1.82428	9.21284	-0.198015	0.843033		0	9.01264	0	1
CSF2	0.66622	-1.20941	4.55893	-0.265283	0.790791		1.27506	4.46909	0.285306	0.77541		2.70937	4.33712	0.624693	0.532173
CSF2RB	0.183485	-1.96166	9.22158	-0.212725	0.831541		0	9.21431	0	1		-1.24614	9.01221	-0.138272	0.890025
CSF3	0.0690012	0	9.22474	0	1		0	9.21431	0	1		0	9.01264	0	1
CSF3R	0.109133	-1.20941	9.22474	-0.131106	0.895692		0	9.21431	0	1		-0.688499	9.01264	-0.0763926	0.939107
CSK	7.08194	0.440714	0.717777	0.613999	0.539216	0.885563	-1.12868	0.751794	-1.50131	0.133276	0.440082	-2.21304	0.879869	-2.51519	0.0118967	0.192933
CSNK1A1	213.518	-0.747793	0.256127	-2.91961	0.00350465	0.126003	-0.0382364	0.253195	-0.151015	0.879964	0.962496	0.0880874	0.248295	0.354769	0.722762	0.946919
CSNK1D	191.803	0.122031	0.204154	0.597738	0.550015	0.888482	-0.367102	0.204475	-1.79534	0.0725992	0.326898	0.232451	0.200312	1.16045	0.245868	0.766367
CSNK1E	6.63583	1.06134	0.717191	1.47986	0.138912	0.664523	-0.940947	0.823029	-1.14327	0.252925	0.568974	0.457787	0.752273	0.608539	0.54283	0.889641
CSNK2A2	95.1976	1.04507	0.308762	3.3847	0.000712567	0.0431478	0.682999	0.309689	2.20543	0.0274237	0.197499	0.17783	0.306215	0.580734	0.561419	0.894275
CSRNP1	110.325	0.548909	0.237192	2.3142	0.020657	0.341956	0.0297636	0.23652	0.12584	0.899859	0.964745	0.203045	0.235753	0.861262	0.389094	0.853224
CSRP1	0.377183	1.93251	4.38856	0.440351	0.659683		-0.0477739	4.44232	-0.0107543	0.99142		0.273309	4.40426	0.0620556	0.950519
CST1	0.35134	-0.247622	6.76394	-0.0366091	0.970797		0.751436	6.73578	0.111559	0.911173		0.443708	6.57545	0.0674795	0.9462
CST6	0.204854	-2.97144	9.21345	-0.322511	0.747066		-0.76931	9.21431	-0.0834908	0.933461		-1.44868	9.01175	-0.160755	0.872287
CSTA	0.345602	0.393505	9.22474	0.0426576	0.965974		0	9.21431	0	1		0.53554	9.01264	0.059421	0.952617
CT45A6	1.26386	-3.6981	3.09802	-1.1937	0.232597	0.773422	-0.994223	3.08525	-0.32225	0.747263	0.902799	-1.90159	2.90053	-0.655601	0.512081
CTCF	15.5902	-0.19785	0.421481	-0.469415	0.638773	0.912991	-0.278206	0.432813	-0.642786	0.520363	0.78614	0.205487	0.441383	0.465553	0.641536	0.923447
CTGF	11.7876	-1.39073	0.726428	-1.91447	0.0555596	0.510526	-1.24382	0.749351	-1.65987	0.0969412	0.377322	-1.00715	0.740128	-1.36078	0.173584	0.662698
CTH	10.8441	-0.570727	0.592505	-0.963246	0.335424	0.827005	0.773396	0.593301	1.30355	0.192388	0.51651	-0.836392	0.6414	-1.30401	0.19223	0.688207
CTHRC1	9.45706	-0.177353	0.801212	-0.221356	0.824815	0.968652	-0.704678	0.845377	-0.833566	0.404525	0.700273	-1.35425	0.872501	-1.55215	0.120627	0.593323
CTNNAL1	40.544	0.581546	0.48095	1.20916	0.226601	0.77289	0.559128	0.48074	1.16306	0.244806	0.567103	-0.0525356	0.478888	-0.109703	0.912645	0.985568
CTNNB1	2656.08	0.268292	0.276053	0.971885	0.331108	0.825573	0.361281	0.276044	1.30878	0.190609	0.514009	0.457206	0.269815	1.69452	0.0901672	0.537064
CTNND1	75.8805	0.386699	0.286466	1.3499	0.177049	0.709739	-0.521005	0.291272	-1.78873	0.0736591	0.330729	0.418371	0.278962	1.49974	0.133681	0.615591
CTPS1	861.405	0.180514	0.117461	1.5368	0.124343	0.637173	0.413002	0.116656	3.54033	0.000399622	0.0105422	0.743009	0.114743	6.47541	9.45518e-11	2.64509e-08
CTSB	147.001	-0.120387	0.219293	-0.548977	0.583021	0.896588	-0.532727	0.2209	-2.41162	0.0158816	0.143953	0.0475108	0.217238	0.218704	0.826881	0.973926
CTSD	36.271	-0.19697	0.341812	-0.576253	0.564444	0.895715	0.105494	0.339597	0.310645	0.75607	0.906164	0.215974	0.346844	0.622682	0.533494	0.888362
CTSG	0.956171	0.114548	2.39457	0.0478366	0.961846		-2.51802	2.55058	-0.987234	0.323528	0.640981	-1.85882	2.48001	-0.749521	0.453543
CTSL	12.6721	-1.14712	0.576555	-1.9896	0.0466345	0.483752	0.37171	0.542526	0.685148	0.493251	0.770347	0.676305	0.557737	1.21259	0.225288	0.729722
CTSS	28.1006	0.585475	0.379813	1.54148	0.1232	0.63704	-1.30019	0.433334	-3.00044	0.00269587	0.0411502	-0.373678	0.399461	-0.935456	0.349553	0.831867
CTTN	156.042	0.200495	0.219829	0.912051	0.361742	0.836613	0.281416	0.217564	1.29348	0.195843	0.5189	0.264012	0.214798	1.22912	0.219026	0.721916
CTTNBP2	8.07953	-0.691607	0.704164	-0.982168	0.326017	0.825573	1.0214	0.689453	1.48147	0.138482	0.448205	0.795927	0.67699	1.17568	0.239721	0.755627
CX3CL1	0.596408	-2.7985	6.58654	-0.424881	0.670923		2.44203	6.51034	0.375101	0.707585		-2.12132	6.43985	-0.329405	0.741849
CXCL1	1.08691	-1.45757	3.04961	-0.477954	0.632683		-0.770123	3.05157	-0.252369	0.800756	0.929236	1.89362	2.83435	0.668096	0.504072
CXCL11	0.165005	-1.60897	9.2235	-0.174443	0.861518		0	9.21431	0	1		-1.24614	9.01221	-0.138272	0.890025
CXCL12	2.36355	0.802076	1.11551	0.719018	0.47213	0.871661	-0.35168	1.27765	-0.275256	0.783119	0.917928	-0.489128	1.35026	-0.362246	0.717168	0.946919
CXCL14	2.61332	-2.76935	1.56692	-1.76738	0.0771641	0.570221	-1.07186	1.22979	-0.871584	0.383435	0.687085	-0.090207	1.10944	-0.0813088	0.935196	0.988073
CXCL17	0.0740395	0	9.22474	0	1		0	9.21431	0	1		1.79383	8.98969	0.199543	0.841838
CXCL2	0.479797	0	4.84977	0	1		-0.769829	4.84825	-0.158785	0.873838		0.0497376	4.69834	0.0105862	0.991554
CXCL3	0.263173	-0.888822	9.22474	-0.096352	0.923241		0	9.21431	0	1		-2.22895	9.00563	-0.247507	0.804516
CXCL5	2.83528	-1.18208	1.06951	-1.10525	0.269053	0.797127	-0.388255	1.04748	-0.370656	0.710894	0.885698	0.521694	1.03994	0.50166	0.615907	0.920182
CXCL6	0.203398	0	9.22474	0	1		-2.27428	9.20873	-0.24697	0.804932		-0.958145	9.01254	-0.106313	0.915334
CXCL8	1.05388	0.0190135	2.70226	0.00703616	0.994386		-2.51321	2.90426	-0.865354	0.386845	0.688286	-3.08203	2.82207	-1.09212	0.274782
CXCL9	0.210606	0.0729132	9.22474	0.00790409	0.993694		-1.4168	9.21419	-0.153763	0.877797		-0.688499	9.01264	-0.0763926	0.939107
CXCR4	376.748	0.195737	0.274076	0.71417	0.475122	0.871661	0.356239	0.27389	1.30067	0.193373	0.517893	-0.252708	0.270266	-0.935034	0.349771	0.831867
CXorf56	2.08609	-0.167358	1.07581	-0.155565	0.876376	0.978474	-0.0530262	1.23261	-0.0430195	0.965686	0.986203	-0.886061	1.23642	-0.716636	0.473598	0.866778
CYAT1	0.328362	1.55429	9.19692	0.169001	0.865796		0.324894	9.18244	0.0353821	0.971775		1.55343	8.9723	0.173136	0.862544
CYB561	5.03054	-1.0072	0.676239	-1.48941	0.136379	0.663441	-0.797134	0.695652	-1.14588	0.251845	0.568584	-1.29141	0.840963	-1.53564	0.124627	0.60128
CYBB	0.490986	-2.15509	4.63047	-0.465415	0.641634		-1.18952	4.63008	-0.256911	0.797248		-2.21852	4.51909	-0.490922	0.623481
CYBRD1	1.98289	-4.03283	1.51315	-2.6652	0.00769433	0.192442	-1.01675	1.10873	-0.917044	0.35912	0.671482	0.0834487	1.10412	0.0755792	0.939754	0.988796
CYC1	85.1752	-0.148164	0.428937	-0.345423	0.729776	0.940125	-0.706618	0.431289	-1.63838	0.101341	0.381327	0.0865395	0.421276	0.205423	0.837242	0.977437
CYCS	898.851	-0.148461	0.153994	-0.964066	0.335013	0.827005	-0.279567	0.153918	-1.81633	0.0693192	0.319237	-0.0202827	0.150311	-0.134938	0.892661	0.983757
CYP11A1	0.0973929	-0.888822	9.22474	-0.096352	0.923241		0	9.21431	0	1		0	9.01264	0	1
CYP11B1	0.131821	-0.888781	9.22474	-0.0963476	0.923245		0.190933	9.21431	0.0207214	0.983468		-0.426151	9.01264	-0.0472837	0.962287
CYP11B2	1.77728	-0.921849	1.50966	-0.610633	0.541443	0.885563	-0.411816	1.39924	-0.294313	0.768518	0.912121	-1.47002	1.50228	-0.978526	0.327814	0.817923
CYP17A1	0.236095	-1.6089	9.2235	-0.174435	0.861524		1.66344	9.18692	0.181066	0.856316		0	9.01264	0	1
CYP19A1	0.50153	1.52726	3.54746	0.430521	0.666817		0.827332	3.47997	0.237741	0.812082		0.004603	3.55731	0.00129395	0.998968
CYP1A1	1.58348	0.567872	1.74005	0.326355	0.744156	0.944401	-3.03444	1.93389	-1.56908	0.116629	0.410825	-1.8556	1.68264	-1.10279	0.270119	0.77639
CYP1A2	0.722237	1.15665	2.25604	0.512689	0.608169		-0.114516	2.24194	-0.0510787	0.959263		-1.56216	2.30331	-0.678222	0.497631
CYP1B1	0.498354	-0.84308	3.8728	-0.217692	0.827669		-0.770028	3.91403	-0.196736	0.844034		0.170735	3.77691	0.0452049	0.963944
CYP24A1	0.388105	-2.74262	8.74315	-0.313688	0.753758		0	8.74364	0	1		-1.21036	8.54451	-0.141653	0.887354
CYP26A1	0.211819	0	9.22474	0	1		0	9.21431	0	1		-1.24614	9.01221	-0.138272	0.890025
CYP26B1	18.3776	0.558681	0.647484	0.86285	0.38822	0.838369	-1.09314	0.667831	-1.63685	0.101662	0.381352	-0.424136	0.653438	-0.649084	0.516284	0.878993
CYP2A13	0.133754	0	9.22474	0	1		-0.769104	9.21431	-0.0834685	0.933479		0.797843	9.01264	0.0885249	0.929459
CYP2A6	0.196666	1.2603	9.20767	0.136875	0.89113		-0.768932	9.21431	-0.0834498	0.933494		1.82298	8.97241	0.203176	0.838997
CYP2A7	0.563193	-1.20944	3.65734	-0.330688	0.74088		-1.41703	3.6564	-0.387547	0.698351		-1.73513	3.54562	-0.489372	0.624579
CYP2B6	0.412192	1.52489	6.66954	0.228636	0.819152		-1.41706	6.71557	-0.211011	0.832879		-2.63711	6.55089	-0.402558	0.687274
CYP2B7P	0.232895	0.200376	9.18399	0.021818	0.982593		0	9.21431	0	1		-0.688499	9.01264	-0.0763926	0.939107
CYP2C18	0.292407	-0.780534	6.76167	-0.115435	0.9081		-0.769461	6.76005	-0.113825	0.909377		2.75188	6.53489	0.421106	0.673678
CYP2C19	72.9297	-0.978405	0.336649	-2.90631	0.00365724	0.127505	0.237511	0.333003	0.713241	0.475697	0.759279	-0.0751501	0.328925	-0.228471	0.81928	0.973301
CYP2C8	0.507241	-1.59932	3.81064	-0.419699	0.674706		-1.39922	3.81269	-0.36699	0.713627		0.252648	3.61398	0.0699085	0.944266
CYP2C9	3.3947	-2.87328	1.20532	-2.38384	0.0171331	0.314926	-4.77039	1.46267	-3.26142	0.00110855	0.0216973	-1.38036	1.0745	-1.28465	0.198914	0.696664
CYP2D6	11.5696	-0.236567	0.638482	-0.370514	0.710999	0.934059	-0.708288	0.642743	-1.10198	0.270472	0.583498	0.333522	0.61508	0.542242	0.587652	0.90701
CYP2E1	7.25329	0.54476	0.702697	0.775241	0.438197	0.853589	-1.33111	0.794773	-1.67483	0.0939667	0.371429	-2.33147	1.04452	-2.23209	0.0256089	0.288003
CYP2F1	0.251575	0	9.22474	0	1		0	9.21431	0	1		-1.55423	9.01117	-0.172478	0.863062
CYP2W1	0.358368	-0.247669	7.66321	-0.0323192	0.974217		-2.05604	7.65358	-0.268637	0.788209		-2.56357	7.47509	-0.342949	0.731637
CYP39A1	3.52239	0.91219	0.839726	1.08629	0.277349	0.805595	-0.527404	0.869123	-0.606824	0.543968	0.798675	-0.276797	0.879145	-0.314848	0.752877	0.955361
CYP3A4	0.5179	0.0729412	4.8599	0.0150088	0.988025		0	4.85837	0	1		-0.282484	4.74733	-0.0595038	0.952551
CYP3A5	0.788316	-2.70668	3.10103	-0.872835	0.382753		-1.74781	3.12328	-0.559605	0.575749	0.815728	-2.72527	3.02218	-0.901758	0.367186
CYP3A7	0.0271355	0	9.22474	0	1		-1.0903	9.21431	-0.118327	0.905809		0	9.01264	0	1
CYP3A7-CYP3AP1	0.709955	0.868875	2.66756	0.32572	0.744637		0.785693	2.69236	0.291823	0.770422		1.60927	2.50596	0.642176	0.520759
CYP4A11	0.410302	-1.60518	5.42407	-0.295937	0.767278		2.33539	5.32815	0.438311	0.661161		-0.229423	5.30077	-0.0432811	0.965477
CYP4A22	0.581181	-0.786853	4.00562	-0.196437	0.844268		1.2719	3.90823	0.325441	0.744847		-1.55461	3.91433	-0.39716	0.69125
CYP4B1	0.274865	-1.20934	9.22474	-0.131097	0.895699		1.39155	9.19679	0.151308	0.879733		0.968149	8.99078	0.107683	0.914248
CYP4F2	1.02111	0	2.33632	0	1		1.28425	2.12125	0.605419	0.5449	0.799077	-2.98446	2.2316	-1.33736	0.181104
CYP4F3	0.115161	-0.888822	9.22474	-0.096352	0.923241		-1.08991	9.21431	-0.118284	0.905842		0.797843	9.01264	0.0885249	0.929459
CYP51A1	980.906	0.0940716	0.250037	0.37623	0.706746	0.934059	-0.355255	0.250434	-1.41856	0.156027	0.470043	-0.00388692	0.245404	-0.0158389	0.987363	0.998038
CYP7A1	0.502473	-2.89138	5.96041	-0.485097	0.627607		-0.119684	5.89256	-0.020311	0.983795		-1.56179	5.83693	-0.26757	0.78903
CYR61	0.912992	0.745193	2.44396	0.304912	0.760433		-0.980888	2.51769	-0.389598	0.696833	0.878211	0.2733	2.46815	0.110731	0.91183
CYTH1	2.4963	0.288568	1.23536	0.233589	0.815304	0.967123	0.768502	1.19489	0.643159	0.520121	0.78614	-2.38401	1.60849	-1.48214	0.138302	0.618025
CYTIP	0.533281	-2.68666	4.17294	-0.64383	0.519686		-1.41717	4.19038	-0.338195	0.735216		1.87274	3.98919	0.469453	0.638746
DAAM1	651.837	0.324831	0.145274	2.23599	0.0253523	0.365813	-0.501921	0.146082	-3.43588	0.000590643	0.0141225	-0.0102698	0.142486	-0.0720759	0.942542	0.990514
DACH1	143.521	-0.18244	0.331761	-0.549914	0.582378	0.896588	-0.10021	0.333235	-0.300719	0.763629	0.910651	0.317786	0.327122	0.97146	0.331319	0.823881
DAD1	287.438	0.162845	0.559711	0.290945	0.771094	0.951119	0.616562	0.560382	1.10025	0.271221	0.584077	-0.467698	0.549863	-0.850572	0.395007	0.856614
DAG1	81.8156	-0.303727	0.249842	-1.21568	0.224108	0.769644	-0.234996	0.254904	-0.921899	0.356581	0.669871	0.452177	0.250621	1.80423	0.071196	0.494911
DAPK1	388.786	-0.0798976	0.229282	-0.348468	0.727489	0.939507	-0.181887	0.228247	-0.796889	0.425515	0.718849	0.00192333	0.223479	0.00860631	0.993133	0.998038
DAXX	1096.59	0.0961432	0.184283	0.521714	0.601869	0.899725	-0.261141	0.184192	-1.41777	0.156259	0.470043	0.222278	0.179737	1.23668	0.216204	0.718222
DAZL	0.597947	-1.06359	4.50836	-0.235915	0.813499		-1.0904	4.61855	-0.23609	0.813362		1.23459	4.47024	0.276179	0.78241
DBF4	325.57	0.273125	0.220413	1.23915	0.215289	0.753514	0.526433	0.219951	2.39341	0.0166926	0.148944	0.524785	0.214334	2.44845	0.0143474	0.214064
DBH	1.97023	0.13271	1.20628	0.110016	0.912396	0.982809	-1.22647	1.12592	-1.08931	0.276018	0.589179	-3.51383	1.43292	-2.45221	0.0141982	0.213258
DBNDD2	119.179	-0.313557	0.562423	-0.557511	0.577178	0.896412	-1.31896	0.565004	-2.33443	0.0195731	0.160041	-0.160452	0.549559	-0.291965	0.770313	0.959571
DCC	4.71444	-0.203506	0.941538	-0.216142	0.828877	0.968652	-0.284338	0.934529	-0.304258	0.760932	0.909297	-0.651054	0.979146	-0.664921	0.506101	0.87726
DCK	177.226	-0.0947079	0.272307	-0.347798	0.727992	0.939507	-0.172176	0.271813	-0.633435	0.526449	0.788631	0.358924	0.263115	1.36413	0.172525	0.662698
DCN	0.958222	-1.13022	1.96612	-0.574851	0.565392		-1.3792	2.09223	-0.659202	0.509766	0.782871	-1.32832	1.94753	-0.682055	0.495204
DCP1B	6.99571	0.842177	0.706401	1.19221	0.233179	0.773422	0.332089	0.726364	0.457193	0.647532	0.852719	0.110468	0.778849	0.141835	0.88721	0.983757
DCTD	656.594	0.275282	0.130651	2.107	0.0351176	0.418682	0.353415	0.130437	2.70947	0.00673915	0.0801761	0.609317	0.127819	4.76701	1.86979e-06	0.00014945
DCTN6	1375.9	0.319278	0.226887	1.40721	0.159364	0.688914	0.083972	0.227223	0.369557	0.711713	0.885981	-0.127061	0.222547	-0.570937	0.568042	0.895898
DCUN1D4	57.7388	-0.0241018	0.480161	-0.0501953	0.959967	0.998314	0.466265	0.483713	0.963929	0.335081	0.649036	0.0374283	0.479184	0.0781084	0.937742	0.988073
DCX	41.381	0.21052	0.345581	0.609178	0.542407	0.885563	-0.953298	0.362772	-2.62782	0.00859351	0.0953627	-0.482548	0.354631	-1.3607	0.173607	0.662698
DDB2	12.4709	0.460979	0.502268	0.917795	0.358726	0.836004	2.45504	0.484965	5.0623	4.14233e-07	2.87241e-05	1.76985	0.50931	3.475	0.00051086	0.0207874
DDC	4.79748	0.357408	0.830666	0.430267	0.667001	0.920126	-2.28562	0.931232	-2.45441	0.0141117	0.132749	-0.910805	0.870372	-1.04645	0.295351	0.803155
DDIAS	2.1695	0.821354	1.09439	0.75051	0.452947	0.86349	1.19695	1.18369	1.0112	0.311918	0.629357	1.7506	1.12958	1.54978	0.121195	0.593509
DDIT3	168.792	-0.108469	0.232327	-0.466878	0.640587	0.913174	0.00891329	0.230123	0.0387328	0.969103	0.986583	0.134631	0.229466	0.586712	0.557397	0.894275
DDIT4	4.63071	-2.08566	1.2253	-1.70216	0.088726	0.594193	1.35876	1.16567	1.16564	0.243758	0.566969	-1.73365	1.38461	-1.25208	0.210539	0.71718
DDR1	256.392	-0.254326	0.275321	-0.923745	0.355619	0.835504	-0.344823	0.274263	-1.25727	0.208656	0.531941	0.0411479	0.266726	0.15427	0.877397	0.983757
DDR2	1.85279	-0.540416	1.45387	-0.371708	0.71011	0.934059	0.641124	1.40042	0.45781	0.647089	0.852598	-1.40306	1.7718	-0.79188	0.428431	0.8617
DDX10	121.262	0.422639	0.210153	2.0111	0.0443146	0.469898	0.359363	0.208515	1.72344	0.0848083	0.354879	0.219933	0.207317	1.06085	0.288757	0.796
DDX3Y	0.320861	-1.20941	9.22474	-0.131106	0.895692		-2.01246	9.21161	-0.21847	0.827063		-2.07908	9.00716	-0.230826	0.81745
DDX42	10.1685	-0.912636	0.765806	-1.19173	0.233366	0.773422	-0.607176	0.766831	-0.791799	0.428478	0.721162	0.179446	0.730688	0.245585	0.806003	0.971842
DDX60	16.5934	-0.720937	0.440927	-1.63505	0.102039	0.60503	-0.946508	0.46474	-2.03664	0.0416861	0.243796	-0.333336	0.419552	-0.794504	0.426902	0.8617
DECR1	25.8957	0.224317	0.495879	0.452362	0.651008	0.91675	0.152645	0.513162	0.29746	0.766115	0.911901	-0.247793	0.517349	-0.478968	0.631961	0.923447
DEFA1B	0.273107	-1.6395	9.05677	-0.181024	0.856348		0.750381	9.03041	0.0830949	0.933776		1.96859	8.79935	0.22372	0.822975
DEFA4	0.065817	0	9.22474	0	1		-0.769555	9.21431	-0.0835175	0.93344		-0.426196	9.01264	-0.0472886	0.962283
DEFA6	0.257173	-1.20941	9.22474	-0.131106	0.895692		0	9.21431	0	1		0	9.01264	0	1
DEFB1	0
DEFB118	0.210597	-2.91094	9.21404	-0.315925	0.75206		0.511615	9.21431	0.055524	0.955721		-0.944877	9.01255	-0.10484	0.916503
DEFB4A	0.208872	0	9.22474	0	1		-0.768978	9.21431	-0.0834548	0.93349		0.273236	9.01264	0.030317	0.975814
DEK	739.467	0.435362	0.215354	2.02161	0.0432166	0.46468	0.643416	0.215291	2.98859	0.00280265	0.0419865	0.318705	0.210604	1.51329	0.130206	0.611247
DENND2D	1.9766	-1.54427	1.29234	-1.19494	0.232111	0.773422	-0.131255	1.40451	-0.0934522	0.925544	0.974109	1.51373	1.23104	1.22964	0.218833	0.721916
DENND3	9.51934	-0.0753375	0.590158	-0.127656	0.898421	0.979283	-1.37957	0.584174	-2.36157	0.0181976	0.154425	-0.268459	0.539976	-0.497168	0.619071	0.920663
DENND4B	1.137	-0.594685	1.74313	-0.341159	0.732984		-0.628009	1.46152	-0.429697	0.667416	0.860512	0.995666	1.34083	0.742577	0.457738
DEPDC1	131.547	-0.523438	0.365711	-1.43129	0.152348	0.677112	0.197105	0.35981	0.547801	0.583828	0.818137	0.749224	0.348191	2.15177	0.0314158	0.324003
DEPDC1B	258.656	-0.150008	0.195437	-0.767549	0.442755	0.856969	0.839279	0.193153	4.34516	1.39173e-05	0.000603167	0.954739	0.187207	5.09992	3.39796e-07	3.26933e-05
DEPTOR	0.493599	-3.07044	5.4116	-0.567381	0.570455		-1.4172	5.43008	-0.260991	0.794099		-0.0855917	5.26242	-0.0162647	0.987023
DERA	460.903	0.160229	0.377726	0.424194	0.671425	0.921807	0.298003	0.377947	0.788478	0.430417	0.722231	-0.0294649	0.370897	-0.0794422	0.936681	0.988073
DES	0.593786	0.0729522	2.94141	0.0248018	0.980213		-0.454961	2.94071	-0.154711	0.877049		0.412877	2.69294	0.153318	0.878148
DFFA	7.47599	0.0805958	0.672062	0.119923	0.904544	0.981959	0.877383	0.656028	1.33742	0.181087	0.499997	-0.498778	0.740905	-0.673201	0.500819	0.877022
DFFB	291.494	0.341356	0.346834	0.984205	0.325015	0.825573	-0.211556	0.346981	-0.609704	0.542058	0.798675	0.240373	0.338087	0.710981	0.477096	0.866778
DHCR7	6.62866	-1.05359	0.63351	-1.6631	0.0962934	0.600379	-0.310595	0.608973	-0.51003	0.61003	0.835556	0.50283	0.630967	0.796919	0.425498	0.8617
DHDDS	169.456	0.0990807	0.170895	0.579774	0.562067	0.89425	-0.103062	0.169549	-0.607862	0.543279	0.798675	0.289554	0.166984	1.73402	0.082915	0.518496
DHFR	40.8443	-0.507279	0.291678	-1.73917	0.0820048	0.580754	-0.244807	0.290765	-0.84194	0.399821	0.696984	0.237596	0.273765	0.867884	0.385458	0.852262
DHRS2	0.192568	0	9.22474	0	1		0	9.21431	0	1		-0.958145	9.01254	-0.106312	0.915334
DHRS7	86.5821	0.131422	0.424689	0.309454	0.756976	0.948823	0.340245	0.426688	0.797409	0.425214	0.718849	-0.340005	0.432504	-0.786132	0.43179	0.8617
DHRS9	0.151614	0	9.22474	0	1		-1.41729	9.21419	-0.153816	0.877755		-2.04671	9.00751	-0.227223	0.82025
DHX15	628.13	0.550257	0.388502	1.41635	0.156672	0.682769	0.33916	0.388905	0.87209	0.383159	0.687085	0.150209	0.38103	0.39422	0.693419	0.939159
DHX29	33.0527	-0.150215	0.383842	-0.391347	0.695541	0.931571	0.021271	0.376804	0.0564511	0.954982	0.983017	0.0814795	0.369395	0.220576	0.825423	0.973301
DLAT	688.406	0.213931	0.169537	1.26185	0.207002	0.738466	0.320464	0.16886	1.89781	0.0577212	0.284157	0.566308	0.165667	3.41835	0.000630032	0.024737
DLD	2.00574	-0.419196	1.18006	-0.355233	0.722415	0.937551	-3.67229	1.61612	-2.27229	0.023069	0.177016	-1.52533	1.50108	-1.01615	0.309557	0.811434
DLG4	110.197	-0.066897	0.319679	-0.209263	0.834243	0.968652	-0.0428383	0.319208	-0.134202	0.893243	0.964745	0.460247	0.314269	1.4645	0.143057	0.624503
DLGAP5	25.3351	0.108785	0.500926	0.217167	0.828078	0.968652	1.50835	0.483554	3.1193	0.00181281	0.0319664	1.34318	0.492677	2.72629	0.00640509	0.139171
DLL1	26.3309	-0.153811	0.595917	-0.258108	0.796324	0.957836	-0.0143226	0.594283	-0.0241007	0.980772	0.991393	0.0458986	0.58698	0.0781945	0.937673	0.988073
DLL4	7.03212	-0.916285	0.764056	-1.19924	0.230435	0.773422	-2.81581	0.869011	-3.24025	0.00119426	0.0230037	-0.442144	0.768075	-0.575652	0.56485	0.895898
DLX5	1.11732	-0.812662	1.87756	-0.432828	0.66514		-1.41103	1.77538	-0.794776	0.426744	0.719241	0.896958	1.59227	0.563319	0.573218
DMRTA1	72.7556	-1.4983	0.379394	-3.9492	7.84131e-05	0.00820129	-0.258704	0.364842	-0.709086	0.478271	0.759598	-0.0521335	0.354983	-0.146862	0.883241	0.983757
DMTF1	19.323	-0.0126677	0.5944	-0.0213117	0.982997	0.998521	1.25921	0.59692	2.10951	0.0349007	0.230801	-0.504609	0.600929	-0.839715	0.401068	0.860084
DMTN	2.40724	-1.17164	1.11073	-1.05483	0.291502	0.812027	-0.99051	1.18487	-0.835962	0.403176	0.698935	-1.1895	1.20254	-0.989156	0.322587	0.812091
DNA2	26.5588	0.278958	0.389855	0.715542	0.474274	0.871661	0.535784	0.383708	1.39633	0.162614	0.476926	0.613611	0.367973	1.66754	0.095407	0.551733
DNAJA3	9.4734	-0.0404783	0.566669	-0.071432	0.943054	0.992143	0.371279	0.563299	0.659116	0.509822	0.782871	0.582776	0.555979	1.0482	0.294548	0.801945
DNAJB1	3.39064	0.00296898	1.14799	0.00258625	0.997936	0.998521	-3.62872	1.52242	-2.38352	0.0171479	0.15079	-3.03185	1.48853	-2.0368	0.0416697	0.38371
DNAJB14	159.217	0.301066	0.266991	1.12763	0.259478	0.790814	0.147064	0.268483	0.54776	0.583857	0.818137	0.362663	0.266615	1.36025	0.173751	0.662698
DNAJB2	0.971724	-4.09175	3.28787	-1.2445	0.213316		-0.685334	3.23304	-0.211978	0.832124	0.944375	-0.788083	3.1723	-0.248426	0.803805
DNAJB4	392.575	0.37817	0.349861	1.08091	0.279735	0.805595	0.570954	0.349336	1.6344	0.102175	0.381631	0.321683	0.341304	0.942513	0.34593	0.830795
DNAJB6	301.355	0.0458379	0.312894	0.146496	0.88353	0.979031	0.150993	0.312331	0.483438	0.628785	0.843757	-0.0807219	0.304819	-0.264819	0.791149	0.967357
DNAJB9	54.006	-0.0689056	0.477686	-0.144249	0.885304	0.979283	0.527473	0.480274	1.09828	0.272084	0.584896	-0.570925	0.495756	-1.15162	0.249476	0.767987
DNAJC15	70.2124	0.220525	0.458548	0.480919	0.630574	0.911547	0.531437	0.461804	1.15078	0.249821	0.568245	-0.441927	0.468217	-0.943851	0.345246	0.830795
DNM1	214.091	0.251776	0.233679	1.07744	0.281282	0.806699	-0.048258	0.234066	-0.206173	0.836656	0.944375	0.261972	0.230251	1.13777	0.255217	0.775308
DNM1L	174.795	0.462674	0.356513	1.29778	0.194365	0.724844	0.51292	0.357446	1.43496	0.1513	0.463057	0.0969559	0.353108	0.274579	0.78364	0.96299
DNMT1	7.40535	-1.20611	0.748285	-1.61183	0.106999	0.609057	0.204528	0.687587	0.297457	0.766117	0.911901	-0.214838	0.693279	-0.309887	0.756647	0.956578
DNMT3A	71.2883	-0.228042	0.213926	-1.06599	0.28643	0.807678	-0.277709	0.210817	-1.3173	0.187737	0.50928	0.440907	0.203948	2.16186	0.0306293	0.317353
DNTTIP2	508.842	0.222882	0.16798	1.32684	0.184563	0.716467	0.109343	0.167399	0.65319	0.513634	0.785003	0.237135	0.163386	1.45138	0.146675	0.629738
DOCK2	1.73206	-2.49132	1.62557	-1.53259	0.125378	0.638263	-2.56948	1.67611	-1.533	0.125276	0.425238	-1.2216	1.68966	-0.722982	0.469691	0.866778
DPH2	5.59301	-1.79083	0.919576	-1.94745	0.051481	0.500307	-0.527913	0.923701	-0.571519	0.567648	0.810589	-0.0180477	0.904594	-0.0199511	0.984082	0.998038
DPM2	165.338	-0.255397	0.178946	-1.42723	0.153515	0.677503	-0.222867	0.180495	-1.23476	0.216921	0.538129	0.289902	0.177235	1.63569	0.101904	0.563923
DPP10	76.3095	0.292553	0.450615	0.64923	0.51619	0.87668	0.396879	0.449897	0.882155	0.377693	0.683056	0.309953	0.442957	0.699736	0.484092	0.86913
DPPA5	0.622706	-0.247645	4.19522	-0.0590303	0.952928		-2.05347	4.16478	-0.493057	0.621972		-1.50817	4.09607	-0.368199	0.712725
DPY30	323.417	0.604041	0.563154	1.0726	0.283449	0.806714	0.601798	0.563912	1.06719	0.285888	0.601257	-0.395936	0.553579	-0.71523	0.474467	0.866778
DPYS	1.50997	0.230467	1.55842	0.147885	0.882434	0.979031	-1.49512	1.70366	-0.877591	0.380166	0.684842	-0.880025	1.56668	-0.561712	0.574312	0.897641
DRAP1	43.0371	0.062202	0.484417	0.128406	0.897828	0.979283	0.650371	0.485966	1.33831	0.180797	0.499766	-0.281935	0.500163	-0.563687	0.572967	0.897641
DRD2	164.613	-0.106182	0.234397	-0.453002	0.650548	0.91675	-0.608504	0.233807	-2.6026	0.00925211	0.100245	-0.0128881	0.22946	-0.0561672	0.955209	0.992334
DSC3	2.88746	2.95978	1.19793	2.47074	0.0134835	0.273713	2.23858	0.963277	2.32392	0.02013	0.162311	0.924694	0.99885	0.925758	0.354572	0.83535
DSG2	12.2465	0.329165	0.679735	0.484255	0.628205	0.911547	0.483543	0.687396	0.703441	0.481781	0.759783	0.293444	0.707886	0.414536	0.678482	0.933607
DSG3	3.01986	-1.61415	1.24606	-1.29541	0.195179	0.724844	1.5116	1.12552	1.34302	0.179265	0.49708	-0.192873	1.17356	-0.164348	0.869457	0.983757
DSP	0.247048	-0.850236	9.2225	-0.0921915	0.926546		-1.08954	9.21431	-0.118244	0.905874		-1.24614	9.01221	-0.138272	0.890025
DTL	57.7322	-0.311144	0.311739	-0.998092	0.318235	0.824432	-0.816507	0.314901	-2.5929	0.00951691	0.102202	-0.298138	0.307342	-0.970056	0.332019	0.824704
DTX3L	0.173905	-1.20941	9.22474	-0.131106	0.895692		-1.41687	9.21419	-0.153771	0.87779		1.2632	9.00076	0.140344	0.888388
DUSP1	637.255	-0.130459	0.155168	-0.84076	0.400482	0.841312	-0.279738	0.154918	-1.80571	0.0709631	0.323291	0.0189263	0.151229	0.125149	0.900405	0.985136
DUSP11	79.2182	0.430668	0.478387	0.90025	0.367987	0.838369	0.47892	0.480388	0.996945	0.318791	0.635227	0.0248483	0.477604	0.052027	0.958507	0.992334
DUSP14	89.2009	0.46437	0.192132	2.41693	0.015652	0.300128	0.576536	0.188784	3.05395	0.00225846	0.0375431	0.321846	0.192815	1.6692	0.0950785	0.551258
DUSP22	265.043	0.296999	0.15067	1.97119	0.0487022	0.495858	0.300296	0.14842	2.02328	0.0430447	0.246578	0.212238	0.14639	1.44981	0.147112	0.629738
DUSP3	374.58	0.715123	0.194584	3.67514	0.000237719	0.0195354	-0.024612	0.196149	-0.125476	0.900146	0.964745	-0.00525277	0.192089	-0.0273455	0.978184	0.996952
DUSP4	65.92	0.634295	0.286875	2.21105	0.0270325	0.371859	0.837249	0.285038	2.93733	0.00331053	0.0472563	-0.144179	0.298672	-0.482734	0.629284	0.923447
DUSP6	4.41481	0.436017	0.764063	0.570656	0.568233	0.895958	-1.42248	0.830905	-1.71196	0.0869039	0.361132	-2.25399	1.2271	-1.83683	0.0662345	0.480577
DYNLL1	1309.28	0.35116	0.550391	0.638019	0.523461	0.880471	0.813021	0.550456	1.47699	0.139677	0.448205	-0.486643	0.538195	-0.904213	0.365882	0.841567
DYNLT3	99.2417	-0.311055	0.197915	-1.57166	0.11603	0.63417	-0.247162	0.196915	-1.25517	0.209417	0.532042	-0.344809	0.197893	-1.74241	0.0814373	0.51636
DYRK3	94.8434	0.255886	0.231418	1.10573	0.268843	0.797127	0.0683809	0.230817	0.296256	0.767035	0.912121	0.0704937	0.229512	0.307146	0.758732	0.956578
E2F1	11.8736	-0.50182	0.589853	-0.850754	0.394906	0.838369	-0.738305	0.604398	-1.22155	0.221876	0.540115	-0.459629	0.585182	-0.785446	0.432192	0.8617
E2F2	0.558981	-1.33346	4.86678	-0.273992	0.784091		-2.41564	4.95196	-0.487815	0.625681		-0.688497	4.853	-0.14187	0.887182
E2F7	18.1296	0.526199	0.361356	1.45618	0.145344	0.672773	1.51761	0.345151	4.39695	1.09784e-05	0.00050273	0.665215	0.374455	1.77649	0.0756529	0.499443
E2F8	10.4815	-0.482324	0.514399	-0.937647	0.348426	0.829551	-1.10131	0.551777	-1.99593	0.0459418	0.252264	0.840489	0.497475	1.68951	0.0911215	0.538074
EAPP	46.2782	0.309033	0.556755	0.555062	0.578852	0.896588	0.589884	0.56147	1.05061	0.293439	0.609218	-0.369721	0.566553	-0.65258	0.514027	0.878751
EBF1	174.925	-0.0838109	0.27164	-0.308537	0.757674	0.948823	-0.136895	0.270933	-0.505274	0.613366	0.835556	0.0246039	0.267317	0.0920402	0.926666	0.986595
EBF3	168.195	-0.0878603	0.22953	-0.382783	0.701881	0.932457	-0.173729	0.229929	-0.755578	0.449902	0.738277	0.182102	0.227669	0.799854	0.423796	0.8617
EBNA1BP2	1184.67	0.201745	0.0725569	2.78051	0.00542735	0.157998	0.46976	0.0718851	6.53486	6.36671e-11	7.726e-09	0.389665	0.071242	5.46959	4.51068e-08	5.60828e-06
EBP	138.817	0.0173852	0.411561	0.0422422	0.966306	0.998359	0.461801	0.412253	1.12019	0.262633	0.578413	-0.050836	0.407085	-0.124878	0.90062	0.985136
ECD	398.446	-0.0346359	0.15953	-0.217112	0.828121	0.968652	-0.114356	0.158779	-0.720219	0.47139	0.755904	0.243213	0.154645	1.57272	0.115783	0.584934
ECH1	42.5264	0.198632	0.295583	0.672002	0.501582	0.872575	-0.126159	0.302927	-0.416468	0.677068	0.865321	-0.282784	0.317739	-0.88999	0.373471	0.848557
ECI1	4331.09	-0.497322	0.320319	-1.55258	0.120523	0.63685	-0.969705	0.320406	-3.02649	0.00247411	0.0392462	-0.238923	0.31286	-0.763673	0.445062	0.862538
ECSCR	1.00748	-0.435064	2.53717	-0.171476	0.863849		-1.41624	2.65563	-0.533297	0.593828	0.825327	-3.55689	2.541	-1.3998	0.161574
EDEM1	11.2443	-0.253509	0.573341	-0.442161	0.658373	0.920126	0.923284	0.553564	1.66789	0.0953376	0.375012	0.99722	0.564556	1.76638	0.0773321	0.506051
EDN1	0.57792	-0.338204	3.47897	-0.0972138	0.922557		-1.24026	3.57331	-0.347091	0.728523		0.42328	3.44487	0.122872	0.902208
EDN3	0.123015	0	9.22474	0	1		-1.08986	9.21431	-0.118279	0.905846		-0.688499	9.01264	-0.0763926	0.939107
EDNRA	0.13649	0	9.22474	0	1		-1.08978	9.21431	-0.11827	0.905854		0	9.01264	0	1
EDNRB	0.216662	0	9.22474	0	1		0	9.21431	0	1		-1.62674	9.0107	-0.180535	0.856733
EEA1	23.1834	0.166952	0.409991	0.407209	0.683854	0.923986	-0.00506375	0.428625	-0.0118139	0.990574	0.996021	-0.201099	0.423365	-0.475001	0.634786	0.923447
EED	34.6153	-0.205041	0.395826	-0.518008	0.604453	0.900084	0.814841	0.389798	2.09042	0.0365801	0.236117	0.243136	0.389654	0.62398	0.532641	0.888264
EEF1A2	0.890678	-0.0343767	2.06971	-0.0166094	0.986748		-1.4574	2.24054	-0.650466	0.515391	0.785219	0.231157	2.11718	0.109182	0.913058
EEF1B2	1490.1	0.350013	0.439609	0.796192	0.42592	0.852379	0.705913	0.439715	1.60539	0.108409	0.393874	-0.0374484	0.430087	-0.0870716	0.930615	0.986918
EEF1G	46.9274	-0.459799	0.38215	-1.20319	0.228903	0.773422	-0.495808	0.388251	-1.27703	0.201593	0.526092	-0.356535	0.388496	-0.917729	0.358761	0.837866
EEF2	12732.1	0.311317	0.259877	1.19794	0.23094	0.773422	-0.0687439	0.259867	-0.264535	0.791368	0.921915	0.313964	0.253929	1.23642	0.216301	0.718222
EEF2K	24.4997	-1.32689	0.430834	-3.07982	0.00207125	0.0922772	-1.35313	0.420837	-3.21532	0.00130298	0.0241399	-0.636573	0.400992	-1.5875	0.1124	0.584934
EFCAB14	61.2828	-0.277796	0.237304	-1.17063	0.241747	0.774735	-0.264585	0.229879	-1.15098	0.249741	0.568245	0.0197353	0.218347	0.090385	0.927981	0.986595
EFNA1	11.5919	-0.175358	0.672836	-0.260626	0.794381	0.957502	-0.891009	0.6677	-1.33444	0.182058	0.500008	0.509748	0.634908	0.802869	0.42205	0.8617
EGF	0.857733	-2.03057	2.74139	-0.740707	0.458871		1.58054	2.63426	0.599994	0.54851	0.802289	-0.286911	2.55602	-0.112249	0.910626
EGFL6	0.0673432	0	9.22474	0	1		0	9.21431	0	1		0.273236	9.01264	0.030317	0.975814
EGFR	3.03054	-1.16469	1.12887	-1.03173	0.3022	0.820497	-5.02841	1.55722	-3.2291	0.00124181	0.0236517	-2.34897	1.42004	-1.65415	0.0980964	0.552507
EGLN3	0.285981	0.909924	7.72261	0.117826	0.906206		-2.54816	7.75394	-0.328627	0.742437		0.273255	7.59204	0.0359923	0.971288
EGR1	60.688	-1.60255	0.569162	-2.81563	0.00486821	0.145683	0.535179	0.538265	0.994266	0.320094	0.636103	0.539983	0.533776	1.01163	0.311716	0.811434
EGR3	0.384051	-2.16355	6.66771	-0.324482	0.745573		-1.4268	6.66047	-0.214219	0.830376		3.35832	6.43897	0.521561	0.601976
EI24	538.199	0.322965	0.263487	1.22573	0.220299	0.764155	0.95223	0.262996	3.6207	0.000293804	0.00819612	0.148065	0.258408	0.57299	0.566652	0.895898
EIF1	9738.66	-0.139468	0.155132	-0.899026	0.368639	0.838369	-0.131751	0.155101	-0.849452	0.39563	0.695029	-0.150305	0.151486	-0.992202	0.321099	0.811616
EIF1AX	202.359	-0.359802	0.198141	-1.81588	0.0693882	0.548668	0.033358	0.199178	0.167478	0.866994	0.95726	0.0288656	0.204776	0.140961	0.8879	0.983757
EIF1AY	0.150334	-0.247576	9.22474	-0.0268382	0.978589		1.65432	9.17767	0.180255	0.856953		-0.426083	9.01264	-0.0472762	0.962293
EIF2B1	146.972	0.0715702	0.24271	0.294879	0.768086	0.951119	0.344929	0.241822	1.42638	0.15376	0.468813	0.161826	0.242025	0.668636	0.503728	0.87726
EIF2S1	1148.73	0.149252	0.0867157	1.72117	0.0852204	0.587102	0.129775	0.0864264	1.50157	0.133209	0.440082	0.29927	0.0850465	3.5189	0.000433342	0.0182985
EIF2S2	42.3236	0.41754	0.497553	0.839189	0.401363	0.841312	0.83647	0.505541	1.6546	0.0980048	0.377322	-0.185039	0.518472	-0.356894	0.721171	0.946919
EIF3A	196.948	0.911255	0.258879	3.52	0.000431545	0.0320317	0.383105	0.25944	1.47666	0.139767	0.448205	0.491455	0.256265	1.91776	0.055141	0.442314
EIF3C	70.8678	-0.373712	0.379412	-0.984977	0.324636	0.825573	-0.719667	0.379479	-1.89646	0.0578994	0.284457	-0.301745	0.37417	-0.80644	0.419989	0.8617
EIF3D	50.243	0.260099	0.421549	0.617008	0.537229	0.885563	0.367775	0.424127	0.867135	0.385868	0.687593	0.288664	0.425596	0.678258	0.497608	0.875092
EIF3E	14124.3	0.0354984	0.128208	0.276882	0.781871	0.951119	0.0686449	0.128229	0.535332	0.592421	0.825327	-0.135544	0.125368	-1.08117	0.27962	0.784196
EIF3K	761.045	0.00936058	0.322599	0.0290161	0.976852	0.998359	0.160907	0.322872	0.498361	0.61823	0.838705	0.0134803	0.316598	0.0425785	0.966038	0.993077
EIF4B	392.526	0.496809	0.190511	2.60777	0.0091133	0.223082	0.376618	0.190404	1.97799	0.0479294	0.256222	0.390628	0.187689	2.08126	0.0374105	0.362445
EIF4EBP1	1590.14	-0.018144	0.178514	-0.101639	0.919043	0.985736	0.855425	0.177996	4.80587	1.54081e-06	9.34885e-05	0.275527	0.174585	1.57818	0.114524	0.584934
EIF4G1	351.969	0.0268825	0.277536	0.0968612	0.922837	0.986309	0.280269	0.277258	1.01086	0.312083	0.629357	0.541831	0.272704	1.98688	0.0469353	0.407136
EIF5	2.44537	-1.41873	1.63085	-0.869929	0.384339	0.838369	-1.57052	1.64941	-0.952169	0.341012	0.656332	-3.54494	1.90866	-1.85729	0.0632699	0.476233
ELAC2	26.3016	-0.121853	0.327144	-0.372475	0.709539	0.934059	-0.0801852	0.325295	-0.2465	0.805295	0.932106	0.161148	0.322573	0.499573	0.617376	0.920512
ELANE	0.0607501	1.5542	9.19693	0.168991	0.865804		-0.769499	9.21431	-0.0835113	0.933445		-0.688499	9.01264	-0.0763926	0.939107
ELAVL1	212.151	-0.0895523	0.195358	-0.4584	0.646665	0.91675	0.128181	0.193671	0.661849	0.508068	0.782871	0.501528	0.188957	2.65419	0.00795	0.152832
ELAVL3	19.7901	-0.672189	0.710136	-0.946564	0.343861	0.829551	-1.16216	0.721472	-1.61081	0.107221	0.391375	-0.486669	0.705406	-0.689914	0.490248	0.871683
ELAVL4	0.326301	-1.53684	9.22372	-0.166618	0.867671		0	9.21431	0	1		0.280891	8.96424	0.0313346	0.975003
ELF3	0.125789	0	9.22474	0	1		-1.68463	9.21339	-0.182846	0.854919		0	9.01264	0	1
ELMOD1	115.136	-0.175478	0.301101	-0.582788	0.560036	0.89287	-0.252994	0.300629	-0.841549	0.40004	0.696984	-0.335825	0.291482	-1.15213	0.249268	0.767987
ELOVL2	0.215653	-1.20937	8.00002	-0.151171	0.879841		0.54769	7.98165	0.0686186	0.945293		0.797919	7.81609	0.102087	0.918688
ELOVL3	1.38642	0.0287156	1.74344	0.0164706	0.986859	0.998521	0.617383	2.01095	0.307011	0.758835	0.907685	1.1451	1.90657	0.600607	0.548102
ELOVL6	14.4911	0.0846896	0.418876	0.202183	0.839774	0.970182	0.0358275	0.408527	0.0876991	0.930116	0.97509	0.261771	0.412875	0.634019	0.526068	0.883226
ELTD1	0.116158	-1.20941	9.22474	-0.131106	0.895692		0	9.21431	0	1		-0.688499	9.01264	-0.0763926	0.939107
EMG1	9.12867	-0.108273	0.589232	-0.183753	0.854207	0.972549	-0.291945	0.613328	-0.476001	0.634073	0.846214	0.188258	0.574695	0.327579	0.74323	0.953232
EML3	0.741913	-4.04917	2.83315	-1.42921	0.152943		-1.67271	2.88985	-0.578822	0.562709		-0.353017	2.67991	-0.131727	0.8952
EMP1	0.694092	2.47613	2.77911	0.89098	0.37294		1.58542	2.84821	0.556638	0.577775		1.28992	2.87487	0.44869	0.653655
EMX1	18.3292	-1.1759	0.522874	-2.24892	0.0245176	0.364444	-0.411641	0.522279	-0.788163	0.430601	0.722231	-0.769635	0.520484	-1.47869	0.139223	0.619445
EMX2	1380.17	-0.563099	0.573405	-0.982026	0.326087	0.825573	-0.940335	0.573443	-1.6398	0.101046	0.381327	-0.17786	0.559813	-0.317713	0.750703	0.954587
EMX2OS	0.67382	1.51969	2.14675	0.707905	0.479004		-2.42708	2.3486	-1.03342	0.301409		-0.269576	2.24944	-0.119842	0.904609
EN1	3.09298	0.794575	0.923467	0.860426	0.389554	0.838369	-0.593481	0.940196	-0.631231	0.52789	0.789882	0.937426	0.85418	1.09746	0.272442	0.77771
ENC1	4.99136	-0.748979	0.764804	-0.979307	0.327428	0.825573	-0.104119	0.769876	-0.135241	0.892422	0.964745	-0.0883499	0.791185	-0.111668	0.911087	0.985568
ENDOG	32.9804	-0.604685	0.648256	-0.932787	0.35093	0.829897	-1.41311	0.654796	-2.15809	0.0309205	0.210207	-0.277055	0.636107	-0.435548	0.663165	0.929135
ENG	0.329156	1.8198	9.18104	0.198213	0.842879		-0.768771	9.21431	-0.0834324	0.933508		-0.958145	9.01254	-0.106313	0.915334
ENO2	229.5	-0.210328	0.153534	-1.36992	0.170713	0.703944	-0.699921	0.154903	-4.51844	6.22968e-06	0.000328684	0.0193651	0.148215	0.130655	0.896048	0.983757
ENOPH1	343.896	0.012261	0.129566	0.0946313	0.924608	0.986309	0.247699	0.128131	1.93316	0.0532159	0.270765	0.246761	0.127927	1.92892	0.0537404	0.438945
ENOSF1	3.21768	0.589761	0.9478	0.622242	0.533783	0.885533	0.391531	0.876679	0.446607	0.655159	0.855797	-0.12744	0.866244	-0.147118	0.883039	0.983757
EOMES	1.63031	0.376204	1.13	0.332923	0.739192	0.944401	-0.21869	1.14603	-0.190824	0.848663	0.950861	0.915409	1.12342	0.814838	0.415165	0.8617
EP300	1208.59	-0.0615942	0.333598	-0.184636	0.853515	0.972549	-0.38398	0.333423	-1.15163	0.249473	0.568245	0.524878	0.325641	1.61183	0.106999	0.575635
EPB41L2	19.5075	-0.126377	0.458933	-0.275372	0.78303	0.951119	-0.372352	0.462255	-0.805513	0.420524	0.715214	-0.0503094	0.4532	-0.111009	0.911609	0.985568
EPB42	0.204786	-0.888822	9.22474	-0.096352	0.923241		0	9.21431	0	1		0.00359519	9.01254	0.00039891	0.999682
EPHA3	49.246	-0.417746	0.310814	-1.34404	0.178935	0.709993	-0.747182	0.30612	-2.44081	0.0146543	0.136268	0.16901	0.28727	0.588331	0.55631	0.894275
EPHA4	0.320452	1.49051	4.39289	0.3393	0.734384		1.58828	4.4095	0.360194	0.718702		-0.68847	4.3801	-0.157181	0.875102
EPHA7	1.96113	-2.61928	1.80777	-1.4489	0.147366	0.677112	0.075104	1.47153	0.0510381	0.959295	0.983419	-1.89996	1.50356	-1.26364	0.206358	0.710506
EPHA8	0.157254	0	9.22474	0	1		-0.769171	9.21431	-0.0834757	0.933473		-0.426196	9.01264	-0.0472886	0.962283
EPHB2	1124.89	0.206455	0.180781	1.14202	0.253447	0.786208	0.00764628	0.180172	0.0424387	0.966149	0.986203	0.464211	0.17635	2.63233	0.00848015	0.154297
EPHB6	0.376513	-1.20942	7.53988	-0.160404	0.872563		-1.8234	7.53239	-0.242074	0.808723		-1.65859	7.36388	-0.225233	0.821798
EPHX1	125.976	-0.137695	0.184838	-0.74495	0.456302	0.866296	-0.680773	0.192744	-3.532	0.000412426	0.0107326	0.413999	0.182595	2.26731	0.0233716	0.266865
EPHX2	16.4243	-0.388036	0.466121	-0.832479	0.405139	0.843471	-0.428069	0.474258	-0.902607	0.366734	0.672859	-0.202355	0.489881	-0.413069	0.679556	0.933607
EPN2	1.43656	-2.94388	1.74428	-1.68774	0.0914612	0.59504	-3.20276	1.76102	-1.8187	0.0689572	0.318779	-2.70339	1.7136	-1.5776	0.114657
EPN3	0.590572	-2.32567	3.66394	-0.634747	0.525593		-0.770089	3.67764	-0.209398	0.834138		0.452969	3.4224	0.132354	0.894704
EPRS	2.73191	-0.660721	1.0731	-0.615713	0.538084	0.885563	0.392536	0.977278	0.401662	0.687933	0.870542	-0.493903	1.0843	-0.455503	0.648747	0.925954
EPS15	300.923	0.0969892	0.261498	0.370898	0.710714	0.934059	0.0449534	0.261656	0.171804	0.863592	0.95726	0.261634	0.256956	1.0182	0.308581	0.811434
EPS8L3	0.288827	-2.19327	9.21997	-0.237882	0.811972		-1.8002	9.21296	-0.195399	0.845081		1.75982	8.96808	0.196232	0.844429
EPSTI1	0.942319	-2.52399	2.16056	-1.16821	0.24272		0.262371	1.91358	0.13711	0.890944	0.964745	-1.83173	2.1264	-0.861423	0.389005
ERBB2	1.11645	0.895993	1.65783	0.54046	0.58888		-2.7903	1.79951	-1.55059	0.121001	0.421332	-1.60425	1.76417	-0.909353	0.363164
ERBB3	7.26483	0.370406	0.763767	0.484973	0.627696	0.911547	-0.742482	0.807222	-0.919798	0.357678	0.669871	-0.17914	0.756367	-0.236842	0.812779	0.972821
EREG	0.330507	-1.47391	9.21844	-0.159887	0.87297		-1.08928	9.21431	-0.118216	0.905896		-1.26574	9.01219	-0.140448	0.888306
ERO1A	88.1824	0.381061	0.295286	1.29048	0.196883	0.724844	0.394452	0.295949	1.33284	0.182585	0.500152	0.393203	0.298664	1.31654	0.187993	0.681895
ERO1B	19.2644	-0.111014	0.511288	-0.217126	0.82811	0.968652	-0.72844	0.566648	-1.28553	0.198608	0.522444	0.424291	0.549856	0.771641	0.440327	0.8617
ESPL1	4.2741	-0.137268	0.91669	-0.149744	0.880967	0.979031	1.77476	0.925159	1.91833	0.0550692	0.275573	0.747792	0.920675	0.812221	0.416665	0.8617
ESR1	0.520137	0	6.49534	0	1		-0.769334	6.4917	-0.11851	0.905663		-2.04393	6.33874	-0.322451	0.747111
ESR2	1.7904	-2.21435	1.78771	-1.23865	0.215477	0.753514	-1.98079	1.98464	-0.998059	0.318251	0.634671	-2.28699	1.83091	-1.2491	0.211627	0.71785
ESRG	0.192662	-0.888822	9.22474	-0.096352	0.923241		-0.769068	9.21431	-0.0834645	0.933482		1.26923	8.98969	0.141187	0.887722
ESRP1	1.67684	-1.28637	2.08922	-0.615717	0.538081	0.885563	-1.26917	2.00026	-0.634501	0.525754	0.788631	-0.511216	1.82057	-0.280801	0.778863	0.962472
ESRP2	0.323148	0	9.22474	0	1		-1.70582	9.21332	-0.185147	0.853114		-1.93475	9.00864	-0.214766	0.829949
ETF1	218.169	0.289494	0.271367	1.0668	0.286063	0.807644	0.473001	0.271492	1.74223	0.0814684	0.348466	0.110197	0.269194	0.409361	0.682275	0.934587
ETFA	1292.33	-0.0503663	0.107437	-0.468799	0.639213	0.912991	-0.277465	0.107699	-2.57631	0.00998609	0.104418	0.0957667	0.105571	0.907128	0.364339	0.841567
ETFB	37.8609	0.366389	0.419832	0.872704	0.382825	0.838369	-0.0785604	0.424659	-0.184996	0.853232	0.952805	0.00514746	0.42963	0.0119811	0.990441	0.998038
ETNK1	475.763	0.130144	0.172215	0.755704	0.449827	0.861824	-0.0164515	0.17272	-0.0952492	0.924117	0.974109	0.206587	0.168548	1.22569	0.220317	0.723155
ETS1	8.32534	0.364985	0.707801	0.51566	0.606092	0.900084	-0.835618	0.752421	-1.11057	0.266752	0.581678	-1.04866	0.794527	-1.31985	0.186884	0.680881
ETV1	401.048	-0.198142	0.209581	-0.94542	0.344445	0.829551	0.192109	0.208187	0.922773	0.356125	0.669871	0.377734	0.202984	1.86091	0.0627569	0.476233
EVI2B	0.172089	-1.20941	9.22474	-0.131106	0.895692		-1.08971	9.21431	-0.118263	0.905859		0.273236	9.01264	0.030317	0.975814
EVL	1608.44	0.0335923	0.181814	0.184762	0.853416	0.972549	-0.494926	0.181778	-2.72269	0.00647529	0.0789725	0.117365	0.177539	0.661066	0.50857	0.878751
EXO1	17.3386	-0.689321	0.445623	-1.54687	0.121895	0.63685	-0.557387	0.484794	-1.14974	0.25025	0.568245	-0.105983	0.431417	-0.245663	0.805943	0.971842
EXOG	262.7	0.665255	0.217145	3.06365	0.00218654	0.094929	0.326078	0.217355	1.50021	0.133559	0.440419	0.32762	0.213682	1.53321	0.125224	0.60128
EXOSC4	122.013	-0.166044	0.248108	-0.669241	0.503342	0.872575	-0.0169114	0.249345	-0.0678234	0.945926	0.979166	-0.189461	0.251868	-0.752222	0.451918	0.864692
EXOSC5	147.428	-0.0278227	0.546651	-0.0508966	0.959408	0.998314	-0.57555	0.547357	-1.05151	0.293026	0.608882	-0.365991	0.534516	-0.684715	0.493524	0.872509
EXOSC8	191.84	0.116557	0.530065	0.219891	0.825956	0.968652	0.8565	0.530917	1.61325	0.106691	0.391119	-0.243728	0.52359	-0.465494	0.641577	0.923447
EXT1	98.6108	0.00212014	0.233686	0.00907259	0.992761	0.998521	-0.238517	0.23481	-1.01579	0.309729	0.628522	0.0846299	0.230497	0.367162	0.713498	0.946919
EXTL1	2.68593	0.733352	1.04516	0.701668	0.482886	0.871661	-0.113608	1.11247	-0.102122	0.91866	0.973091	-0.565024	1.10168	-0.512876	0.608038	0.916974
EZH2	243.213	-0.5597	0.141475	-3.95617	7.61621e-05	0.00820129	-0.559751	0.13949	-4.01283	5.99961e-05	0.00214133	0.106784	0.13834	0.771891	0.440179	0.8617
F13A1	0.475208	-2.82659	4.15946	-0.679557	0.496785		-1.81514	4.17729	-0.434526	0.663907		0.994152	4.03462	0.246405	0.805369
F2	0.934742	1.0798	2.91016	0.371044	0.710605		0	3.12358	0	1	1	-1.29801	3.03028	-0.428346	0.6684
F2R	4.32346	-0.298405	0.928906	-0.321244	0.748026	0.946306	-0.621389	0.8966	-0.69305	0.488278	0.765666	0.390137	0.928525	0.420168	0.674362	0.93047
F2RL2	0.263317	-1.60897	9.2235	-0.174443	0.861518		-1.41675	9.21419	-0.153757	0.877801		-0.426196	9.01264	-0.0472886	0.962283
F3	263.636	0.0520544	0.168544	0.308847	0.757438	0.948823	0.371939	0.16604	2.24006	0.0250868	0.187332	-0.237312	0.166051	-1.42916	0.15296	0.637474
F5	0.29741	-1.84537	9.22229	-0.200099	0.841403		-1.41689	9.21419	-0.153773	0.877789		-2.72782	9.00154	-0.303039	0.76186
F9	0.0591646	0	9.22474	0	1		0	9.21431	0	1		0	9.01264	0	1
FABP1	0.555851	-0.497684	2.87539	-0.173084	0.862585		-3.09076	2.90498	-1.06395	0.287351		-1.83931	2.87084	-0.640688	0.521726
FABP4	1.19526	-2.73595	2.53298	-1.08013	0.280085		-1.41612	2.56577	-0.55193	0.580996	0.818137	-0.00366783	2.32274	-0.00157909	0.99874
FAH	6.81364	-0.043169	0.674625	-0.0639897	0.948978	0.993614	0.038996	0.679732	0.0573696	0.954251	0.983017	0.570058	0.627788	0.908043	0.363855	0.841567
FAIM	20.7357	0.512032	0.496518	1.03124	0.302426	0.820497	0.0641985	0.515236	0.1246	0.90084	0.964745	-0.108106	0.51853	-0.208485	0.83485	0.975615
FAM13A	121.504	0.00608755	0.258121	0.0235841	0.981184	0.998359	0.169088	0.257743	0.656035	0.511801	0.783686	0.282554	0.253388	1.1151	0.264806	0.77639
FAM174A	540.593	-0.331265	0.14341	-2.30991	0.0208931	0.343084	-0.564182	0.143592	-3.92908	8.5273e-05	0.00287441	-0.201745	0.137789	-1.46416	0.14315	0.624503
FAM183A	0.313443	-0.999786	9.22158	-0.108418	0.913664		-0.223764	9.14728	-0.0244623	0.980484		-0.426051	9.01264	-0.0472726	0.962296
FAM20B	24.0528	0.460153	0.490079	0.938937	0.347763	0.829551	-0.157252	0.499506	-0.314816	0.752902	0.905165	0.801149	0.496693	1.61297	0.106752	0.575635
FAM229B	13.8039	0.63205	0.616498	1.02523	0.305256	0.820497	-0.23422	0.635958	-0.368294	0.712654	0.886071	-0.496298	0.660215	-0.751722	0.452218	0.864692
FAM46C	0.353394	0.393549	6.01554	0.065422	0.947838		0.512265	6.01265	0.0851979	0.932104		0.535599	5.87723	0.0911311	0.927388
FAM57A	23.7101	-0.353538	0.449428	-0.786641	0.431492	0.853589	0.122185	0.428359	0.28524	0.77546	0.915461	0.907401	0.406467	2.23241	0.0255878	0.288003
FAM63A	6.81707	-0.490021	0.632992	-0.774136	0.438851	0.853589	-0.98019	0.674096	-1.45408	0.145924	0.455803	-0.100835	0.660976	-0.152555	0.878749	0.983757
FAM69A	70.5016	-0.468356	0.293429	-1.59615	0.110456	0.616889	-0.122751	0.289484	-0.424036	0.67154	0.863215	-0.396473	0.28192	-1.40633	0.159627	0.654968
FAM72A	155.044	0.149322	0.199784	0.747419	0.45481	0.865607	1.50409	0.182774	8.22923	1.88416e-16	5.08095e-14	1.4147	0.175429	8.06421	7.37136e-16	4.12428e-13
FAM72B	1.94634	-0.0255141	1.2987	-0.019646	0.984326	0.998521	2.24963	1.25795	1.78833	0.0737224	0.330729	1.48446	1.20046	1.23657	0.216245	0.718222
FAM72C	15.3921	-0.471008	0.521643	-0.902931	0.366562	0.838369	1.99974	0.510123	3.92011	8.85083e-05	0.0029426	0.383713	0.499746	0.767816	0.442597	0.8617
FAM83D	13.175	-0.548603	0.702853	-0.780536	0.435075	0.853589	1.75103	0.629865	2.78001	0.00543569	0.0687105	1.44699	0.604734	2.39277	0.0167215	0.226805
FAM96A	1104.8	-0.752385	0.452485	-1.66278	0.0963559	0.600379	-0.365867	0.452314	-0.808878	0.418586	0.713418	-0.219194	0.441632	-0.496327	0.619664	0.920663
FAM96B	606.113	0.128764	0.407891	0.315683	0.752243	0.948445	0.66494	0.408083	1.62942	0.103223	0.384237	0.0144403	0.399963	0.0361042	0.971199	0.993077
FANCI	28.419	-0.0526505	0.343778	-0.153153	0.878278	0.978652	-0.140699	0.360675	-0.390099	0.696464	0.878211	0.489802	0.341907	1.43256	0.151983	0.636092
FAS	6.0811	1.78479	0.79062	2.25746	0.0239794	0.360631	3.14022	0.753866	4.16549	3.1069e-05	0.00121961	0.611113	0.829697	0.73655	0.461396	0.866778
FASLG	0.769045	0.649839	2.25584	0.28807	0.773293		2.5908	2.2904	1.13116	0.257989	0.574746	-2.81466	2.41619	-1.16492	0.244053
FASN	2239.19	-0.203113	0.443858	-0.457609	0.647233	0.91675	-1.10443	0.44392	-2.48791	0.0128495	0.124743	-0.0677904	0.433637	-0.15633	0.875773	0.983757
FASTKD5	112.057	0.232203	0.210227	1.10453	0.269363	0.797127	-0.10488	0.210941	-0.497199	0.619049	0.838878	0.106376	0.206318	0.515592	0.606139	0.915794
FAT1	31.2501	-0.275137	0.424241	-0.64854	0.516636	0.87668	-0.0958579	0.406978	-0.235535	0.813793	0.935612	0.367824	0.408752	0.899872	0.368188	0.843619
FBL	197.976	0.0162573	0.316185	0.0514172	0.958993	0.998314	0.573514	0.315706	1.81661	0.0692769	0.319237	0.442061	0.310727	1.42266	0.154834	0.644085
FBN1	0.437219	0.427836	5.91704	0.0723058	0.942359		-2.46783	5.95268	-0.414574	0.678454		0.273274	5.83058	0.0468691	0.962618
FBXL12	201.544	-0.559945	0.251646	-2.22513	0.0260727	0.365813	-0.386346	0.250244	-1.54388	0.122618	0.421523	-0.190737	0.244452	-0.780263	0.435236	0.8617
FBXO11	95.6296	0.461887	0.566693	0.815057	0.41504	0.847752	0.599009	0.56782	1.05493	0.291458	0.606663	-0.313363	0.559511	-0.560065	0.575435	0.89869
FBXO21	6.43297	0.458326	0.684597	0.669483	0.503187	0.872575	0.0119353	0.704478	0.0169421	0.986483	0.994267	1.07545	0.719719	1.49426	0.135107	0.615823
FBXO22	15.8192	0.136388	0.395578	0.344781	0.730259	0.940125	1.09099	0.381357	2.86082	0.0042255	0.056659	0.796604	0.430681	1.84964	0.0643655	0.479489
FBXO32	3.23481	0.780079	1.02299	0.762545	0.445735	0.856969	0.0163781	1.08535	0.0150901	0.98796	0.995342	-0.993576	1.06222	-0.935376	0.349594	0.831867
FBXO5	245.962	-0.270171	0.174935	-1.54441	0.122488	0.63685	-0.0160706	0.173959	-0.0923817	0.926395	0.974582	0.103341	0.170956	0.60449	0.545518	0.891312
FBXO7	1303.22	0.0443195	0.147612	0.300244	0.763991	0.949676	-0.242827	0.147664	-1.64445	0.100083	0.380127	0.111118	0.14438	0.769622	0.441524	0.8617
FCER1G	12.0072	0.431825	0.48201	0.895884	0.370315	0.838369	0.806787	0.494785	1.63058	0.102979	0.383917	1.17267	0.483083	2.42746	0.0152049	0.217131
FCGR1A	0.354602	0	7.46853	0	1		-1.417	7.46284	-0.189874	0.849408		-0.85228	7.29293	-0.116864	0.906968
FCGR1B	0.251693	0	9.22474	0	1		-1.08977	9.21431	-0.118269	0.905855		-1.82912	9.00111	-0.20321	0.838971
FCGR1CP	0.164607	0.393505	9.22474	0.0426576	0.965974		0	9.21431	0	1		0	9.01264	0	1
FCGR2B	0.746749	-2.21884	2.58969	-0.856797	0.391557		1.03419	2.47935	0.41712	0.67659		-1.90732	2.61182	-0.730266	0.465228
FCGR3A	0.180784	-1.20941	9.22474	-0.131106	0.895692		0	9.21431	0	1		1.50001	8.99089	0.166837	0.867498
FCGR3B	0.0254744	0	9.22474	0	1		0	9.21431	0	1		0.53554	9.01264	0.059421	0.952617
FCHO1	7.52214	-0.589549	0.709698	-0.830703	0.406141	0.843471	-0.536993	0.710281	-0.756029	0.449632	0.738277	-0.373321	0.698992	-0.534084	0.593283	0.911302
FCMR	0.13963	-1.20941	9.22474	-0.131106	0.895692		-1.08996	9.21431	-0.11829	0.905838		-0.688499	9.01264	-0.0763926	0.939107
FCRL3	0.526348	-1.87895	2.84976	-0.659336	0.50968		-1.41655	2.85801	-0.495641	0.620148		-0.321203	2.69499	-0.119185	0.905128
FCRLA	0.126782	0	9.22474	0	1		-1.3973	9.21423	-0.151646	0.879467		0	9.01264	0	1
FDFT1	167.663	-0.0364711	0.311305	-0.117155	0.906737	0.982761	0.266102	0.311575	0.854056	0.393074	0.693811	0.308196	0.307363	1.00271	0.316	0.811434
FDPS	40.8375	-0.332804	0.34595	-0.962001	0.336049	0.827005	0.119842	0.348236	0.344141	0.73074	0.896522	-0.534738	0.348995	-1.53222	0.125468	0.60128
FEN1	15.902	-0.25678	0.418793	-0.613143	0.539781	0.885563	-0.474784	0.432971	-1.09657	0.272829	0.584904	0.0397544	0.433488	0.0917082	0.92693	0.986595
FERMT2	147.169	-0.285374	0.222367	-1.28335	0.19937	0.727542	-0.464358	0.223883	-2.07411	0.0380692	0.237432	-0.424128	0.219046	-1.93625	0.052837	0.433147
FEZ2	494.3	-0.0870366	0.142385	-0.611277	0.541016	0.885563	-0.120736	0.142309	-0.848405	0.396212	0.695029	0.229698	0.140461	1.63532	0.101982	0.563923
FGB	0.368415	-2.19164	8.69631	-0.252019	0.801026		-1.0897	8.6926	-0.125359	0.900239		-2.60888	8.49042	-0.307273	0.758636
FGF17	0.421933	-0.888812	6.58736	-0.134927	0.89267		0.512164	6.58355	0.0777944	0.937992		-0.24232	6.3635	-0.0380798	0.969624
FGF18	2.95668	0.0363373	1.02022	0.0356173	0.971588	0.998359	-2.58851	1.28085	-2.02092	0.0432876	0.246578	0.33498	1.05399	0.317821	0.750621	0.954587
FGF2	106.931	0.24769	0.193336	1.28114	0.200145	0.727542	0.836631	0.190986	4.38059	1.18356e-05	0.000531943	0.788085	0.18688	4.21706	2.47512e-05	0.00167858
FGF21	0.260014	0.913011	9.19693	0.0992735	0.920921		-2.35427	9.20777	-0.255683	0.798196		1.0009	9.00076	0.111202	0.911456
FGF7	40.2018	0.54797	0.306276	1.78913	0.0735931	0.564391	-0.0383485	0.311049	-0.123288	0.901879	0.964745	-0.264203	0.317952	-0.830952	0.406001	0.8617
FGF8	4.49408	-0.391249	0.829872	-0.471457	0.637314	0.912991	0.0629768	0.841692	0.0748217	0.940357	0.978664	-0.309101	0.866341	-0.356789	0.72125	0.946919
FGFR2	10.8361	-0.614456	0.540661	-1.13649	0.255751	0.786237	-0.160208	0.513103	-0.312234	0.754863	0.905611	-0.0523789	0.502193	-0.1043	0.916931	0.986595
FGFR4	0.11918	0	9.22474	0	1		-0.769322	9.21431	-0.0834922	0.93346		-1.19063	9.01227	-0.132112	0.894895
FGG	0.0330142	0	9.22474	0	1		0	9.21431	0	1		-0.688499	9.01264	-0.0763926	0.939107
FGL2	0.119249	0	9.22474	0	1		-0.456805	9.21419	-0.0495763	0.96046		-0.426151	9.01264	-0.0472837	0.962287
FGR	0.128737	-1.60897	9.2235	-0.174443	0.861517		-1.09001	9.21431	-0.118295	0.905834		-0.426196	9.01264	-0.0472886	0.962283
FHL2	27.2875	-0.395618	0.51889	-0.762432	0.445802	0.856969	-0.706727	0.518358	-1.3634	0.172758	0.487296	-0.25344	0.50212	-0.504741	0.613741	0.920182
FIBIN	1.09563	-2.55317	2.21754	-1.15136	0.249586		1.44279	2.0333	0.709582	0.477963	0.759598	1.83074	1.94124	0.943077	0.345641
FIG4	90.541	0.0925148	0.213068	0.434203	0.664141	0.920126	-0.127377	0.214484	-0.593875	0.552596	0.80338	-0.259992	0.20928	-1.24232	0.21412	0.717936
FIGF	79.7671	0.246569	0.330662	0.745685	0.455858	0.866168	-0.235186	0.3334	-0.705417	0.480551	0.759783	0.0732106	0.321921	0.227418	0.820099	0.973301
FIS1	1.41291	-0.771259	1.70964	-0.451123	0.651901	0.917446	-0.444076	1.84162	-0.241134	0.809451	0.93416	-0.976387	1.88437	-0.51815	0.604354
FKBP14	118.773	-0.331656	0.343862	-0.964504	0.334793	0.827005	-0.335744	0.343682	-0.976902	0.328618	0.644423	-0.0915506	0.334774	-0.27347	0.784492	0.96299
FKBP1A	12.6514	-0.829224	0.616418	-1.34523	0.178551	0.709993	1.32774	0.612573	2.16747	0.0301987	0.209321	-0.247636	0.570605	-0.433988	0.664297	0.929135
FKBP4	23.4465	0.182106	0.325301	0.559808	0.57561	0.896412	0.352377	0.310566	1.13463	0.256532	0.574357	0.269558	0.331759	0.812512	0.416498	0.8617
FKBP5	85.1374	0.181206	0.222382	0.814841	0.415164	0.847752	0.434394	0.218676	1.98647	0.0469806	0.252524	0.174963	0.223847	0.781618	0.434439	0.8617
FKSG49	0.15374	0.393505	9.22474	0.0426576	0.965974		0	9.21431	0	1		-0.426196	9.01264	-0.0472886	0.962283
FLAD1	40.7339	0.393291	0.282298	1.39318	0.163566	0.693123	0.0559815	0.291647	0.19195	0.847782	0.950816	0.455144	0.287558	1.58279	0.11347	0.584934
FLJ22763	0.108777	-1.90079	9.22196	-0.206115	0.836701		-1.08998	9.21431	-0.118292	0.905836		0	9.01264	0	1
FLNA	483.15	0.215756	0.220747	0.977389	0.328377	0.825573	0.0548722	0.21995	0.249476	0.802993	0.931134	0.475228	0.216021	2.19991	0.0278132	0.300511
FLRT2	27.6251	-0.187847	0.298496	-0.629311	0.529145	0.884359	0.678956	0.284272	2.3884	0.016922	0.149889	0.227243	0.288719	0.787074	0.431238	0.8617
FLRT3	1.23588	-3.13821	1.87151	-1.67683	0.0935749	0.598008	0.637842	1.56156	0.408465	0.682932	0.870066	-1.49032	1.88557	-0.790382	0.429304
FLT1	0.93289	-1.38237	2.35494	-0.58701	0.557197		-1.09083	2.47462	-0.440807	0.659353	0.859217	-0.971953	2.40233	-0.404588	0.685781
FMO1	0.610487	-0.888836	3.31582	-0.268059	0.788654		-1.56321	3.2912	-0.474966	0.634811		0.00642181	3.11226	0.00206339	0.998354
FMO3	0.401516	0.0729358	5.95405	0.0122498	0.990226		0	5.95124	0	1		-0.198669	5.73742	-0.0346268	0.972377
FMO5	0.213722	0.435577	9.21439	0.0472714	0.962297		0	9.21431	0	1		-0.688499	9.01264	-0.0763926	0.939107
FN1	372.273	-0.251584	0.185156	-1.35877	0.174219	0.704532	-0.687097	0.184334	-3.72746	0.000193418	0.00579537	0.109565	0.179667	0.609825	0.541978	0.889641
FNDC4	0.298301	-2.84744	9.21469	-0.309011	0.757313		-0.129028	9.21431	-0.014003	0.988828		-0.426151	9.01264	-0.0472837	0.962287
FOLH1	4.73406	-1.56913	0.918669	-1.70805	0.0876268	0.594193	-0.582228	0.935684	-0.622249	0.533778	0.794255	-1.17574	0.915893	-1.28371	0.199244	0.69673
FOLH1B	0.259972	-1.20941	9.22474	-0.131106	0.895692		-1.08958	9.21431	-0.118249	0.905871		-1.62681	9.0107	-0.180542	0.856727
FOLR1	0.0236658	0	9.22474	0	1		0	9.21431	0	1		0	9.01264	0	1
FOS	4.4142	-0.247648	1.74056	-0.14228	0.886859	0.979283	-1.94912	1.72736	-1.12838	0.259159	0.575265	-1.63645	1.64452	-0.995093	0.319691	0.811434
FOSB	4.03137	-2.2783	1.37173	-1.66089	0.0967346	0.600379	-1.13044	1.3598	-0.831328	0.405788	0.700986	-0.411131	1.25301	-0.328114	0.742825	0.953232
FOSL1	5.44233	1.03807	0.917091	1.13191	0.257672	0.788435	4.05673	0.880302	4.60834	4.05898e-06	0.00022389	-0.559502	1.18729	-0.471243	0.637467	0.923447
FOXA1	1.09736	-4.02181	1.75332	-2.29383	0.0218001		0.340467	1.61602	0.210682	0.833136	0.944375	-1.75003	1.79119	-0.977017	0.328561
FOXD3	0.0601448	0	9.22474	0	1		0	9.21431	0	1		0	9.01264	0	1
FOXE3	1.12442	-0.745224	1.94855	-0.382451	0.702127		-2.19397	2.18387	-1.00462	0.315079	0.631684	1.88286	1.86272	1.01082	0.312105
FOXG1	0.320912	-1.81197	9.2225	-0.196473	0.84424		-3.09	9.20035	-0.335857	0.736979		-2.33454	9.00464	-0.25926	0.795435
FOXJ1	0.441956	0.508638	4.90433	0.103712	0.917398		-1.81872	4.95376	-0.367139	0.713515		-1.52881	4.84159	-0.315766	0.75218
FOXJ3	24.8429	0.444086	0.508013	0.874162	0.38203	0.838369	-0.12714	0.526238	-0.241601	0.809089	0.93416	0.391819	0.518593	0.755543	0.449923	0.86435
FOXM1	1.2873	-1.74841	2.03068	-0.861	0.389238	0.838369	1.53737	1.95056	0.788172	0.430596	0.722231	0.243473	1.84492	0.13197	0.895008
FOXO3	217.971	0.459538	0.430505	1.06744	0.285773	0.807644	0.290867	0.43121	0.674537	0.49997	0.776345	0.139597	0.422607	0.330323	0.741156	0.953232
FOXO4	127.698	-0.137916	0.366533	-0.376271	0.706715	0.934059	-0.902028	0.368193	-2.44988	0.0142905	0.133912	0.169308	0.360418	0.469756	0.63853	0.923447
FPGS	333.748	-0.666647	0.204024	-3.26749	0.00108506	0.0594456	-0.221671	0.202098	-1.09685	0.272707	0.584904	0.655624	0.199208	3.29115	0.000997774	0.0369721
FPGT	4.57348	-0.991183	0.883729	-1.12159	0.262036	0.79235	1.05118	0.915898	1.1477	0.251092	0.568245	-0.977472	0.966001	-1.01187	0.311598	0.811434
FPR1	0.398333	-1.27036	5.38638	-0.235848	0.813551		0	5.39294	0	1		-0.282983	5.27024	-0.0536946	0.957179
FRS2	608.227	0.10538	0.284149	0.370861	0.710741	0.934059	-0.00755124	0.283565	-0.0266297	0.978755	0.991005	0.201571	0.276981	0.727745	0.46677	0.866778
FSD1	255.659	0.0815922	0.467506	0.174526	0.861452	0.973049	-0.63965	0.467815	-1.36731	0.171527	0.486328	0.00540112	0.45676	0.0118249	0.990565	0.998038
FSHB	0.138984	-1.20941	9.22474	-0.131106	0.895692		-1.09	9.21431	-0.118294	0.905834		1.23771	8.99089	0.137663	0.890507
FST	0.182309	0	9.22474	0	1		0	9.21431	0	1		-1.62681	9.0107	-0.180542	0.856727
FSTL1	86.2042	-0.248601	0.254524	-0.976728	0.328704	0.825573	-0.107421	0.250228	-0.429292	0.667711	0.860512	0.299119	0.244303	1.22438	0.220811	0.723155
FSTL3	0.240157	0.393505	9.22474	0.0426576	0.965974		0	9.21431	0	1		-0.688499	9.01264	-0.0763926	0.939107
FTH1	53.2098	0.0759964	0.330073	0.230241	0.817905	0.967123	0.740378	0.334205	2.21534	0.0267368	0.196043	-0.227147	0.344308	-0.659721	0.509433	0.878751
FTL	63.683	-0.539276	0.448391	-1.20269	0.229096	0.773422	0.999307	0.43924	2.27508	0.022901	0.176447	0.0227339	0.431933	0.052633	0.958024	0.992334
FURIN	3.64479	0.496553	0.689993	0.719649	0.471741	0.871661	-0.486568	0.696744	-0.698346	0.484961	0.762229	0.619151	0.658725	0.939924	0.347257	0.831475
FUT1	1.22979	-2.45799	1.96182	-1.25291	0.210239	0.744245	-1.69315	2.02772	-0.835001	0.403717	0.699373	0.83178	1.67263	0.49729	0.618984
FUT4	16.9962	-0.174796	0.57218	-0.30549	0.759993	0.948823	-1.02315	0.589305	-1.7362	0.0825278	0.350166	-0.0687322	0.580344	-0.118434	0.905724	0.985568
FYB	0.0335662	0	9.22474	0	1		0	9.21431	0	1		-0.688499	9.01264	-0.0763926	0.939107
FYN	2281.55	0.0960523	0.155355	0.618276	0.536393	0.885563	-0.033686	0.15533	-0.216867	0.828312	0.943809	0.152235	0.151567	1.00441	0.315183	0.811434
FZD1	106.192	-0.0575696	0.333738	-0.1725	0.863045	0.973049	-0.470732	0.334765	-1.40616	0.159677	0.473221	-0.00898909	0.332256	-0.0270547	0.978416	0.996952
FZD10	0.336978	0	9.22474	0	1		-2.36643	9.20761	-0.257008	0.797172		0.797843	9.01264	0.0885249	0.929459
FZD2	6.70485	-1.13141	0.690822	-1.63777	0.10147	0.60503	-0.580471	0.671563	-0.864358	0.387391	0.688286	0.473553	0.649057	0.729602	0.465634	0.866778
FZD5	1.0767	0.22943	1.96201	0.116936	0.906911		-0.422457	2.0171	-0.209438	0.834107	0.944375	-2.01803	2.21597	-0.910676	0.362466
FZD7	0.70176	-1.53425	3.21418	-0.477338	0.633121		-2.57743	3.20719	-0.803642	0.421603		-1.92865	3.12479	-0.61721	0.537097
G0S2	1.10193	-1.22397	2.22967	-0.548947	0.583042		0.0460274	2.32666	0.0197825	0.984217	0.992395	-2.82971	2.33631	-1.21119	0.225823
G3BP1	1852.3	0.264634	0.160007	1.6539	0.0981486	0.60503	0.514841	0.159766	3.22247	0.00127088	0.0237264	0.360477	0.156331	2.30586	0.0211184	0.253084
G3BP2	210.176	0.319389	0.30655	1.04189	0.297465	0.816819	0.519357	0.306332	1.6954	0.0899992	0.366376	0.15418	0.304615	0.506147	0.612754	0.920182
G6PC	0.497988	-0.638093	3.92756	-0.162466	0.870939		-2.45504	3.91127	-0.627683	0.530212		-1.77452	3.83324	-0.46293	0.643415
G6PD	1299.67	-0.339539	0.161976	-2.09623	0.0360619	0.423659	-0.704608	0.161925	-4.35144	1.35246e-05	0.000596804	-0.0753642	0.157931	-0.477198	0.633221	0.923447
GAA	82.0646	-0.539243	0.384076	-1.404	0.160319	0.688914	-1.32269	0.385113	-3.43455	0.000593529	0.0141225	0.0295607	0.370383	0.0798112	0.936387	0.988073
GABARAPL1	4.69256	-0.832417	0.816546	-1.01944	0.307996	0.820497	-1.12121	0.883471	-1.26909	0.204408	0.527763	-1.83336	0.982441	-1.86613	0.0620232	0.476233
GABBR1	10.1772	0.740709	0.556988	1.32985	0.183569	0.715918	-0.698868	0.547895	-1.27555	0.202114	0.526129	-0.116917	0.54667	-0.213871	0.830648	0.973926
GABPB1	497.855	-0.0850732	0.126936	-0.670203	0.502729	0.872575	-0.29362	0.128019	-2.29356	0.0218156	0.171347	-0.0477808	0.124606	-0.383456	0.701382	0.941293
GABRA2	0.082897	-1.53679	9.22372	-0.166613	0.867674		0.511427	9.21431	0.0555036	0.955737		-0.426151	9.01264	-0.0472837	0.962287
GABRB3	137.115	0.69785	0.323679	2.156	0.0310839	0.397356	0.0717423	0.32429	0.221229	0.824914	0.943481	0.362469	0.319928	1.13297	0.257226	0.775308
GAD1	0.304159	1.077	8.90987	0.120877	0.903789		1.3432	8.8828	0.151213	0.879808		0.273332	8.71548	0.0313617	0.974981
GAD2	0.0120126	0	9.22474	0	1		0	9.21431	0	1		0.797843	9.01264	0.0885249	0.929459
GADD45A	207.222	0.501716	0.28175	1.78072	0.0749585	0.56924	0.907116	0.281265	3.22513	0.00125916	0.0236898	0.143289	0.279176	0.513258	0.607771	0.916974
GADD45B	62.3931	-0.854253	0.708576	-1.20559	0.227975	0.773422	0.866993	0.693697	1.24981	0.211367	0.533807	-0.209623	0.688039	-0.304667	0.76062	0.956578
GADD45G	12.7726	-0.543903	0.621144	-0.875646	0.381222	0.838369	-0.404864	0.630176	-0.642463	0.520573	0.78614	0.234346	0.648342	0.361454	0.71776	0.946919
GAGE1	1.79932	0.742953	1.57216	0.47257	0.63652	0.912991	-1.60628	1.77056	-0.907216	0.364292	0.672859	1.63236	1.4717	1.10917	0.267358	0.77639
GAGE12F	0.485992	0.326149	3.74114	0.087179	0.930529		-1.40661	3.82849	-0.367406	0.713316		1.67037	3.5798	0.466609	0.640779
GAGE12J	0.157696	-1.20941	9.22474	-0.131106	0.895692		0	9.21431	0	1		-0.426196	9.01264	-0.0472886	0.962283
GAGE2A	1.89193	-0.411543	1.47368	-0.279263	0.780043	0.951119	-2.714	1.88505	-1.43975	0.149938	0.461803	0.212072	1.43256	0.148037	0.882314	0.983757
GAGE2D	1.3666	-0.666484	1.85224	-0.359826	0.718977	0.936895	1.3345	1.76095	0.75783	0.448553	0.738059	-1.85265	1.9809	-0.935257	0.349656
GAGE3	1.71245	-0.304584	1.96432	-0.155059	0.876775	0.978474	-0.86463	1.98471	-0.435646	0.663093	0.859217	0.0751081	1.867	0.0402292	0.96791	0.993077
GAGE4	0.030282	0.393505	9.22474	0.0426576	0.965974		0	9.21431	0	1		0	9.01264	0	1
GALE	40.6434	-0.267503	0.291862	-0.916539	0.359385	0.836004	-0.963498	0.302657	-3.18347	0.00145522	0.0267563	0.0602959	0.289886	0.207998	0.83523	0.975615
GALNT3	52.1877	0.601891	0.339961	1.77047	0.0766487	0.570221	-0.730175	0.351513	-2.07723	0.0377799	0.237075	0.458062	0.331711	1.38091	0.167307	0.660739
GAP43	9293.47	-0.294232	0.280417	-1.04926	0.294057	0.814826	-0.768121	0.280421	-2.73917	0.00615943	0.0758829	-0.226368	0.273941	-0.82634	0.408611	0.8617
GAPDH	4822.1	0.112184	0.125006	0.897424	0.369492	0.838369	0.17284	0.125024	1.38245	0.166833	0.480595	0.0974647	0.122486	0.795722	0.426194	0.8617
GAS2	20.0849	-0.214404	0.34079	-0.629139	0.529258	0.884359	-0.907183	0.374072	-2.42516	0.0153018	0.140141	0.0395877	0.345621	0.114541	0.908809	0.985568
GATA2	8.16611	-0.0198998	0.623594	-0.0319114	0.974543	0.998359	-0.779656	0.646965	-1.2051	0.228166	0.547532	0.343298	0.630535	0.544455	0.586128	0.905283
GATA3	0.250566	-2.22052	9.2198	-0.240842	0.809677		-0.768978	9.21431	-0.0834548	0.93349		-1.47828	9.01161	-0.164042	0.869698
GATA6	0.300822	0	9.22474	0	1		1.74867	9.18419	0.1904	0.848996		-1.06847	9.00769	-0.118617	0.905579
GBF1	31.0368	0.162125	0.330723	0.490215	0.623982	0.911547	0.0883792	0.319069	0.276991	0.781787	0.917928	0.55938	0.325468	1.71869	0.0856702	0.527942
GBP1	0.35172	0	7.4727	0	1		0	7.46715	0	1		2.50025	7.23971	0.345353	0.729829
GBP5	0.453395	-0.888841	3.87204	-0.229553	0.818439		-2.61789	3.84821	-0.680288	0.496322		0.14463	3.72419	0.0388354	0.969022
GCHFR	0.288742	-1.49803	7.72359	-0.193955	0.846211		-1.08993	7.72518	-0.141088	0.8878		-0.688498	7.55357	-0.0911487	0.927374
GCLC	69.7815	-0.176959	0.260454	-0.679426	0.496868	0.872575	0.2512	0.258657	0.971171	0.331463	0.645006	0.355563	0.25693	1.38389	0.166392	0.660049
GCLM	377.122	-0.641377	0.239825	-2.67436	0.00748725	0.191424	0.464804	0.237543	1.95671	0.0503811	0.262957	0.538895	0.233369	2.3092	0.0209327	0.253084
GCNT3	0.145236	-0.888822	9.22474	-0.096352	0.923241		-0.769299	9.21431	-0.0834897	0.933462		-1.24614	9.01221	-0.138272	0.890025
GDA	0.393047	0	4.49049	0	1		0	4.48928	0	1		1.55164	4.30385	0.360524	0.718455
GDF15	145.431	1.14463	0.331253	3.45547	0.000549341	0.0395011	3.84719	0.32734	11.7529	6.82384e-32	3.31229e-29	1.70218	0.325837	5.22402	1.75077e-07	1.78101e-05
GDF7	0.714269	1.09438	3.3093	0.330699	0.740872		0.472214	3.26093	0.14481	0.884861		-1.89776	3.34199	-0.567854	0.570134
GDF9	0.488035	1.84538	4.88024	0.378133	0.705332		1.52884	4.92293	0.310556	0.756138		-1.87231	4.88027	-0.383649	0.701239
GDI2	1620.2	0.239965	0.302666	0.792839	0.427872	0.852379	0.152725	0.302792	0.50439	0.613987	0.835753	0.0639695	0.296094	0.216044	0.828953	0.973926
GDNF	0.80295	-3.67225	3.59083	-1.02267	0.306462		1.28105	3.47268	0.368894	0.712206	0.885981	1.26532	3.44539	0.36725	0.713432
GDPD3	2.31598	1.13661	1.12305	1.01207	0.311503	0.820497	-1.37471	1.27898	-1.07485	0.282442	0.599727	-1.0685	1.15818	-0.922567	0.356233	0.83535
GDPD5	4.76616	-0.950288	0.871001	-1.09103	0.27526	0.804838	-1.603	0.956067	-1.67666	0.093608	0.370614	-0.621348	0.890399	-0.69783	0.485283	0.86913
GEMIN5	882.752	-0.0693475	0.20568	-0.337163	0.735994	0.943467	-0.0644392	0.204946	-0.31442	0.753202	0.905165	0.336495	0.200169	1.68105	0.0927528	0.540575
GEN1	428.615	-0.606986	0.3484	-1.74221	0.0814721	0.580754	-0.641316	0.34741	-1.84599	0.0648931	0.305224	0.110055	0.338207	0.325409	0.744872	0.95422
GFAP	0.283489	-2.71846	9.21609	-0.294969	0.768018		-0.129198	9.21431	-0.0140214	0.988813		-0.688455	9.01264	-0.0763877	0.939111
GFOD1	22.1805	0.354101	0.384285	0.921455	0.356813	0.835504	-0.782784	0.406908	-1.92374	0.0543876	0.274924	0.140701	0.381134	0.369164	0.712006	0.946919
GFPT1	0.606026	-1.9051	2.96621	-0.642268	0.520699		-2.30587	2.97966	-0.77387	0.439008		0.200197	2.88498	0.069393	0.944677
GFRA1	0.515019	-3.73682	4.45991	-0.837869	0.402104		-1.09053	4.49368	-0.24268	0.808253		1.23434	4.34694	0.283956	0.776444
GGCX	70.218	-0.175097	0.248546	-0.704485	0.481131	0.871661	-0.073008	0.246736	-0.295895	0.76731	0.912121	0.433825	0.24336	1.78265	0.0746437	0.497284
GGH	55.8185	-0.0924462	0.567671	-0.162852	0.870635	0.976759	0.377865	0.573375	0.659019	0.509883	0.782871	-0.38605	0.569901	-0.677398	0.498154	0.875092
GGT1	6.29849	0.485755	0.821099	0.59159	0.554125	0.891549	-1.15922	0.78615	-1.47455	0.140334	0.448205	0.34938	0.764465	0.457025	0.647653	0.925573
GGT5	1.49119	0.910129	1.39678	0.65159	0.514666	0.875274	-0.589306	1.24369	-0.473836	0.635617	0.846214	1.50575	1.16731	1.28993	0.197076	0.694036
GHR	0.580804	-1.57624	4.20024	-0.375274	0.707457		-1.41717	4.27486	-0.331512	0.740258		-0.822791	4.17142	-0.197245	0.843636
GIMAP1-GIMAP5	0.552547	-0.888812	6.647	-0.133716	0.893627		-0.444344	6.64296	-0.0668894	0.94667		-1.56875	6.48076	-0.242063	0.808732
GIMAP4	1.20937	-4.16724	1.91442	-2.17676	0.0294985		-2.58078	1.97412	-1.30731	0.191109	0.514784	1.23062	1.59608	0.771029	0.44069
GIMAP5	0.153882	-2.21314	9.21985	-0.240041	0.810298		-1.08985	9.21431	-0.118278	0.905848		0	9.01264	0	1
GIMAP6	0.151412	-1.60897	9.2235	-0.174443	0.861517		-0.76922	9.21431	-0.083481	0.933469		0	9.01264	0	1
GIMAP7	0.443919	0.534553	5.39808	0.0990265	0.921117		-1.82902	5.47506	-0.334063	0.738332		-2.20265	5.34236	-0.412299	0.68012
GIMAP8	3.71443	-1.6834	1.20265	-1.39974	0.161591	0.688914	0.489092	1.08354	0.451382	0.651715	0.854284	-0.387387	1.05914	-0.365755	0.714548	0.946919
GIN1	9.30673	-0.24773	0.666722	-0.371565	0.710217	0.934059	0.481336	0.680725	0.707093	0.479509	0.759598	0.146155	0.686978	0.21275	0.831522	0.973926
GINS1	2.95147	-2.41148	1.24199	-1.94162	0.0521832	0.500307	-0.805852	1.26331	-0.637889	0.523546	0.788242	-0.923475	1.26863	-0.72793	0.466656	0.866778
GINS2	63.834	-0.192399	0.260441	-0.738743	0.460063	0.869346	-0.341883	0.265504	-1.28768	0.197858	0.521392	-0.0428361	0.260207	-0.164623	0.869241	0.983757
GINS3	112.746	-0.45082	0.241938	-1.86337	0.0624097	0.518429	-0.815171	0.242443	-3.36233	0.00077289	0.0167482	-0.187463	0.235428	-0.796262	0.42588	0.8617
GJA1	27.9454	0.105222	0.490885	0.214352	0.830273	0.968652	0.489209	0.496361	0.98559	0.324335	0.641276	0.390378	0.493482	0.791068	0.428904	0.8617
GJB1	0.179524	0	9.22474	0	1		0	9.21431	0	1		-0.688499	9.01264	-0.0763926	0.939107
GJB2	0.495796	0.305286	4.11938	0.0741096	0.940923		-1.92189	4.22327	-0.455072	0.649057		-1.24342	4.13061	-0.301026	0.763394
GJB6	0.0724795	0	9.22474	0	1		0	9.21431	0	1		-0.426196	9.01264	-0.0472886	0.962283
GJD4	0.217813	0	9.22474	0	1		-1.68435	9.21339	-0.182816	0.854943		-0.958145	9.01254	-0.106313	0.915334
GLB1	14.3995	0.0185846	0.420604	0.0441856	0.964756	0.998314	-0.667157	0.426967	-1.56255	0.118158	0.41381	-0.0583054	0.419959	-0.138836	0.88958	0.983757
GLDC	420.95	-0.857626	0.45644	-1.87894	0.0602521	0.513478	-0.936302	0.456275	-2.05206	0.0401642	0.24121	-0.601108	0.444476	-1.3524	0.176249	0.665168
GLI1	1.27592	-2.24667	2.01342	-1.11585	0.264485	0.794172	0.573978	1.75724	0.326636	0.743944	0.901874	-3.71512	1.95515	-1.90017	0.0574108
GLI2	0.61178	-1.60391	4.89518	-0.327652	0.743175		-1.40602	4.89577	-0.28719	0.773967		2.10513	4.68602	0.449236	0.653261
GLI3	87.7296	-0.292474	0.771553	-0.379072	0.704635	0.933966	-1.55104	0.775442	-2.0002	0.0454784	0.252264	-0.226943	0.753483	-0.301192	0.763268	0.95703
GLIS3	0.256112	-2.08113	9.22072	-0.225701	0.821434		-1.82435	9.21284	-0.198022	0.843028		0	9.01264	0	1
GLOD4	7.55012	-0.013833	0.708221	-0.019532	0.984417	0.998521	-0.214449	0.739166	-0.290123	0.771722	0.913643	0.0376809	0.710539	0.0530315	0.957707	0.992334
GLRX	259.375	-0.432274	0.199578	-2.16594	0.0303159	0.390106	-0.371039	0.200395	-1.85154	0.0640919	0.302041	-0.506201	0.197537	-2.56257	0.0103902	0.173532
GLUD1	2.5689	0.394281	0.961439	0.410095	0.681736	0.923986	-0.0741726	1.092	-0.0679237	0.945846	0.979166	0.333136	1.04601	0.318483	0.750119	0.954587
GLUL	668.019	0.0660483	0.238401	0.277046	0.781744	0.951119	0.0130609	0.238383	0.0547897	0.956306	0.983017	0.248829	0.233618	1.06511	0.286825	0.794447
GMFG	0.43985	-1.43938	7.4355	-0.193581	0.846504		2.43018	7.39751	0.328512	0.742524		-2.05775	7.29546	-0.282058	0.777899
GMIP	6.07392	-1.25442	1.055	-1.18903	0.234428	0.773422	-1.43955	1.05026	-1.37065	0.170483	0.485066	0.23089	0.980566	0.235467	0.813847	0.973015
GMNN	140.348	0.106476	0.389603	0.273293	0.784628	0.951729	0.169128	0.390864	0.432701	0.665232	0.8597	-0.225753	0.383833	-0.588153	0.55643	0.894275
GMPR2	75.358	-0.450887	0.290751	-1.55077	0.120958	0.63685	-0.397062	0.288462	-1.37648	0.168674	0.482448	0.142416	0.280619	0.507508	0.611799	0.920034
GNA11	2.99328	0.00854059	0.993009	0.00860072	0.993138	0.998521	-2.08897	1.22239	-1.70892	0.0874659	0.362252	-1.14091	1.20346	-0.948021	0.343119	0.830795
GNA15	2.29899	0.025376	1.10028	0.0230632	0.9816	0.998359	3.32461	1.14183	2.91165	0.00359525	0.049861	1.19128	1.1395	1.04544	0.29582	0.803317
GNAI1	17.9999	-0.0164476	0.431773	-0.0380932	0.969613	0.998359	-0.261774	0.450691	-0.580827	0.561357	0.808121	-0.17189	0.453175	-0.379302	0.704463	0.942297
GNAI2	339.648	-0.292105	0.227625	-1.28328	0.199395	0.727542	-0.47849	0.228758	-2.09169	0.0364663	0.23601	-0.0507856	0.224551	-0.226166	0.821073	0.973301
GNAI3	80.5576	0.646973	0.301686	2.14453	0.0319906	0.404452	0.014842	0.305811	0.0485331	0.961291	0.984411	0.511071	0.299685	1.70536	0.0881272	0.53177
GNAL	0.264389	-1.20941	9.22474	-0.131106	0.895692		0	9.21431	0	1		0.53554	9.01264	0.059421	0.952617
GNAO1	0.38656	1.74193	4.03332	0.431886	0.665824		-1.09064	4.12707	-0.264264	0.791577		-1.85517	4.02534	-0.460874	0.644889
GNAQ	209.8	0.264742	0.279704	0.946506	0.34389	0.829551	-0.0527798	0.280166	-0.188388	0.850573	0.951432	0.0863949	0.275187	0.313949	0.753559	0.955361
GNAS	3462.1	-0.00551792	0.162361	-0.0339854	0.972889	0.998359	0.0333396	0.162325	0.205388	0.837269	0.944375	0.375337	0.158766	2.3641	0.0180741	0.236549
GNB1	3248.42	0.244756	0.237645	1.02993	0.303045	0.820497	0.288888	0.237649	1.21561	0.224135	0.542889	0.429747	0.232448	1.84879	0.0644889	0.479489
GNB3	6.21798	-1.07091	0.807695	-1.32588	0.184878	0.716467	-2.72731	1.00164	-2.72285	0.00647213	0.0789725	-0.329565	0.810594	-0.406573	0.684322	0.934587
GNB5	25.4268	0.011556	0.362105	0.0319135	0.974541	0.998359	-0.515836	0.363737	-1.41816	0.156144	0.470043	0.591075	0.341841	1.72909	0.0837921	0.519364
GNGT1	0.0426685	1.07675	9.21439	0.116856	0.906975		0	9.21431	0	1		-0.688499	9.01264	-0.0763926	0.939107
GNLY	0.111669	0	9.22474	0	1		0	9.21431	0	1		1.50001	8.99089	0.166837	0.867498
GNMT	10.8861	0.326272	0.516504	0.631692	0.527588	0.88418	-0.467176	0.562221	-0.830947	0.406003	0.700986	0.340236	0.545267	0.623981	0.53264	0.888264
GNPDA1	333.49	-0.149017	0.142188	-1.04803	0.294626	0.814826	0.173313	0.141495	1.22487	0.220624	0.54011	0.214083	0.140854	1.5199	0.128537	0.609461
GNRHR	0.370355	-3.46345	8.61252	-0.402141	0.68758		-1.08964	8.62031	-0.126403	0.899413		0.00362218	8.43034	0.00042966	0.999657
GNS	86.9991	0.480075	0.304906	1.5745	0.115372	0.632075	0.457889	0.306287	1.49497	0.134922	0.443107	0.394364	0.300624	1.31182	0.189581	0.685432
GOLGA2	62.4385	0.155517	0.259572	0.59913	0.549086	0.887876	-0.0201125	0.257443	-0.0781238	0.93773	0.978293	0.201123	0.260695	0.771489	0.440417	0.8617
GOLT1B	16.6037	-0.44583	0.71076	-0.627257	0.530491	0.884387	-0.868444	0.741824	-1.17069	0.241724	0.565283	-0.352814	0.700418	-0.503719	0.614459	0.920182
GOT1	66.2627	-0.0769834	0.26725	-0.288058	0.773302	0.951119	-0.119122	0.265201	-0.449175	0.653306	0.854756	0.326053	0.256894	1.26921	0.204365	0.708037
GPAT3	0.188582	-1.63948	9.2234	-0.177752	0.858918		0	9.21431	0	1		-1.24614	9.01221	-0.138272	0.890025
GPATCH8	45.2858	0.299461	0.442845	0.676221	0.4989	0.872575	0.462943	0.443955	1.04277	0.297055	0.615147	0.311327	0.431402	0.721665	0.470501	0.866778
GPC1	367.319	-1.35044	0.588817	-2.29349	0.02182	0.347761	-1.06595	0.588249	-1.81207	0.0699751	0.32163	-0.0884941	0.573591	-0.154281	0.877388	0.983757
GPER1	1.11777	-0.717115	2.34272	-0.306103	0.759526		-2.525	2.5736	-0.981115	0.326536	0.642743	-2.46431	2.49153	-0.989075	0.322626
GPI	266.756	0.23685	0.270107	0.876874	0.380555	0.838369	0.476728	0.269738	1.76738	0.0771652	0.336834	0.476632	0.266139	1.79091	0.0733078	0.497284
GPR171	0.359144	-3.46293	9.20947	-0.376018	0.706904		0	9.21431	0	1		-1.24614	9.01221	-0.138272	0.890025
GPR18	0.130129	0	9.22474	0	1		0	9.21431	0	1		-2.20777	9.00583	-0.245149	0.806341
GPR183	0.960783	-3.9714	2.10985	-1.88232	0.059793		-2.66969	2.14438	-1.24497	0.213141	0.534948	0.768507	1.88938	0.406751	0.684191
GPR65	0.192291	0.393505	9.22474	0.0426576	0.965974		-1.08956	9.21431	-0.118247	0.905872		0.53554	9.01264	0.059421	0.952617
GPR87	0.255112	1.16135	9.21179	0.126072	0.899675		2.27953	9.16415	0.248744	0.803558		1.66869	8.97658	0.185894	0.852528
GPR89A	412.388	0.200168	0.227759	0.878861	0.379477	0.838369	0.0468088	0.228601	0.204762	0.837758	0.944375	0.067335	0.224552	0.299864	0.764281	0.957169
GPR89B	166.78	0.359747	0.374616	0.960309	0.3369	0.828166	0.278408	0.376292	0.739872	0.459378	0.747111	0.146213	0.370559	0.394575	0.693157	0.939159
GPS1	791.305	0.0285177	0.1937	0.147226	0.882953	0.979031	-0.226659	0.193966	-1.16855	0.242585	0.565565	0.124485	0.19007	0.654944	0.512504	0.878751
GPX1	843.522	-0.217827	0.116733	-1.86602	0.0620385	0.517212	0.196787	0.116436	1.69008	0.0910129	0.367535	0.0752068	0.115282	0.652375	0.514159	0.878751
GPX2	0.252042	-2.07476	9.22076	-0.225009	0.821972		-2.3407	9.20795	-0.254205	0.799337		0	9.01264	0	1
GPX4	595.144	-0.0542997	0.334573	-0.162295	0.871073	0.976774	0.182654	0.33506	0.54514	0.585657	0.819245	0.302695	0.32798	0.922908	0.356055	0.83535
GRB10	90.9976	0.267392	0.331257	0.807205	0.419549	0.852058	1.29928	0.326928	3.97422	7.0609e-05	0.00244812	0.817273	0.323029	2.53003	0.0114054	0.187686
GRB14	3.32113	-1.0108	1.11146	-0.909433	0.363122	0.838057	-0.43321	1.00683	-0.430272	0.666998	0.860512	0.472608	0.88956	0.531283	0.595223	0.911779
GRB7	0.0135787	0	9.22474	0	1		-0.769729	9.21431	-0.0835363	0.933425		0	9.01264	0	1
GREB1	331.666	0.145483	0.23885	0.609099	0.542459	0.885563	0.0521956	0.237534	0.21974	0.826074	0.943735	0.528932	0.231686	2.28297	0.0224321	0.258779
GRHL2	0.0864367	-0.888781	9.22474	-0.0963476	0.923245		-0.12988	9.21431	-0.0140955	0.988754		-0.688455	9.01264	-0.0763877	0.939111
GRIA2	243.326	0.162979	0.39252	0.415211	0.677987	0.92302	-0.483118	0.394136	-1.22576	0.220288	0.540066	-0.385282	0.385574	-0.999241	0.317678	0.811434
GRIA3	1.21359	0.509665	1.564	0.325872	0.744521	0.944401	-1.77141	1.92598	-0.919745	0.357706	0.669871	0.0444151	1.50977	0.0294185	0.976531
GRIK4	0.306587	-1.60813	7.72286	-0.20823	0.835049		0	7.71821	0	1		-1.47563	7.54552	-0.195564	0.844952
GRIK5	8.4701	-0.358012	0.626045	-0.571863	0.567415	0.895958	-0.594023	0.603205	-0.984777	0.324733	0.641276	0.264758	0.598255	0.442551	0.658091	0.92863
GRIN1	0.600049	-0.181287	3.6404	-0.0497986	0.960283		0.0952969	3.71179	0.0256741	0.979517		-2.1291	3.64003	-0.584913	0.558606
GRIN2A	0.268267	0	9.22474	0	1		-0.768992	9.21431	-0.0834563	0.933489		-2.46103	9.00355	-0.27334	0.784592
GRIN2B	0.0118329	0	9.22474	0	1		0	9.21431	0	1		0	9.01264	0	1
GRIN2C	1.45718	-2.919	2.13475	-1.36737	0.171509	0.703944	-0.172296	1.91368	-0.0900341	0.92826	0.974854	-2.0834	2.1043	-0.990065	0.322142
GRIN2D	7.78762	-0.0661111	0.517529	-0.127744	0.898352	0.979283	-0.735784	0.537866	-1.36797	0.171322	0.486328	0.342365	0.522874	0.654776	0.512612	0.878751
GRK1	0.0649927	-0.888822	9.22474	-0.096352	0.923241		0	9.21431	0	1		0	9.01264	0	1
GRM4	106.645	-0.460932	0.261069	-1.76556	0.0774703	0.570221	-0.881743	0.259954	-3.39192	0.000694036	0.0158908	0.0375229	0.258636	0.14508	0.884648	0.983757
GRN	14.2195	-0.319929	0.346174	-0.924187	0.355389	0.835504	-0.566127	0.348848	-1.62285	0.104622	0.386412	0.385834	0.349842	1.10288	0.270079	0.77639
GRWD1	13.1638	0.457299	0.4726	0.967624	0.333232	0.826258	-0.532043	0.481281	-1.10547	0.268955	0.582941	0.677186	0.452452	1.4967	0.134471	0.615823
GSC	0.213484	1.09388	9.20176	0.118877	0.905372		-1.08975	9.21431	-0.118267	0.905856		-2.13194	9.0066	-0.236709	0.812883
GSDMB	102.672	1.25827	0.278995	4.51001	6.48258e-06	0.00165942	0.581766	0.279827	2.07902	0.0376156	0.237075	0.194188	0.274747	0.70679	0.479697	0.86913
GSK3A	79.1097	-0.23347	0.364506	-0.640511	0.52184	0.880409	0.47744	0.358065	1.33339	0.182405	0.500152	0.243548	0.349132	0.697582	0.485439	0.86913
GSK3B	396.107	0.53218	0.28388	1.87467	0.0608387	0.513478	0.0198777	0.284362	0.0699027	0.944271	0.979166	0.469729	0.278653	1.68571	0.0918517	0.539538
GSN	9.17579	-0.143826	0.616391	-0.233336	0.815501	0.967123	-1.49368	0.675161	-2.21234	0.0269435	0.196806	-0.486447	0.610501	-0.796801	0.425567	0.8617
GSR	909.084	0.170373	0.110363	1.54376	0.122646	0.63685	0.248688	0.109755	2.26585	0.0234609	0.179055	0.457486	0.107729	4.24663	2.17014e-05	0.00151774
GSTA1	0.0534245	0	9.22474	0	1		0	9.21431	0	1		-0.426196	9.01264	-0.0472886	0.962283
GSTA2	0.998038	-3.63423	2.65384	-1.36943	0.170866		-0.770178	2.7102	-0.284177	0.776274	0.915461	-2.11927	2.60255	-0.814305	0.41547
GSTA3	0.264457	0	9.22474	0	1		-0.768593	9.21431	-0.083413	0.933523		0.00359001	9.01254	0.000398335	0.999682
GSTA4	1.92914	-0.648125	1.33641	-0.484975	0.627694	0.911547	-0.2674	1.37719	-0.194163	0.846048	0.94975	-1.92796	1.39394	-1.3831	0.166634	0.660049
GSTA5	0.679612	-3.26602	3.71211	-0.879828	0.378953		2.23736	3.63802	0.614992	0.53856		-1.33194	3.58321	-0.371716	0.710105
GSTM1	4.28237	-1.12785	1.12544	-1.00214	0.316277	0.824183	-1.23771	1.16631	-1.06122	0.288589	0.604683	-4.35777	1.52375	-2.85989	0.00423784	0.105381
GSTM2	412.055	-0.260109	0.274631	-0.947123	0.343576	0.829551	-0.92928	0.275284	-3.37572	0.000736239	0.0163931	-0.17283	0.26731	-0.646552	0.517922	0.878993
GSTM3	371.751	-0.00153766	0.456498	-0.00336839	0.997312	0.998521	0.217705	0.457011	0.476367	0.633813	0.846214	-0.207143	0.448148	-0.462222	0.643922	0.923759
GSTO1	75.932	-0.304827	0.326192	-0.9345	0.350046	0.829897	-0.0454767	0.328074	-0.138617	0.889753	0.964745	-0.381482	0.319656	-1.19341	0.232707	0.741879
GSTP1	706.348	0.0776164	0.476079	0.163033	0.870493	0.976759	0.380013	0.476368	0.797729	0.425028	0.718849	-0.0939816	0.466577	-0.201428	0.840364	0.977843
GSTZ1	13.0504	-0.342771	0.518369	-0.66125	0.508452	0.87306	-0.835233	0.539639	-1.54776	0.12168	0.421523	-1.02632	0.593419	-1.7295	0.0837198	0.519364
GTF2A2	16.7641	0.279319	0.60289	0.463301	0.643148	0.913952	0.758875	0.613757	1.23644	0.216295	0.537592	0.452435	0.634735	0.712793	0.475974	0.866778
GTF2E2	82.7771	0.948894	0.409955	2.31463	0.0206333	0.341956	0.477278	0.414602	1.15117	0.249661	0.568245	0.415876	0.4075	1.02055	0.307466	0.811434
GTF2H2	8.92389	-0.609419	0.603248	-1.01023	0.312385	0.820497	-0.688305	0.609405	-1.12947	0.258699	0.574966	-0.830218	0.67391	-1.23194	0.217971	0.721626
GTF2H2B	39.8217	0.422804	0.339645	1.24484	0.21319	0.751378	0.0453644	0.348353	0.130225	0.896388	0.964745	-0.0690172	0.350631	-0.196837	0.843955	0.978366
GTF2H2C	2417.55	0.217099	0.0985726	2.20243	0.0276349	0.371859	0.114309	0.098431	1.16131	0.245515	0.567103	0.236827	0.0961976	2.46188	0.013821	0.213258
GTF2IP1	66.6762	-0.326588	0.262817	-1.24264	0.213999	0.751775	0.125815	0.261598	0.480946	0.630555	0.845034	0.26958	0.267953	1.00607	0.314382	0.811434
GTPBP8	54.9934	-0.167434	0.488371	-0.342841	0.731718	0.941131	0.0809476	0.490826	0.164921	0.869006	0.957975	-0.120899	0.481333	-0.251176	0.801678	0.970484
GUCY1A3	4.50074	-0.222932	0.77694	-0.286935	0.774162	0.951119	0.15894	0.834776	0.190398	0.848997	0.950861	0.708023	0.762493	0.928563	0.353115	0.83535
GUCY1B3	7.56044	-0.407469	0.673713	-0.604811	0.545305	0.886579	-0.174522	0.71165	-0.245236	0.806274	0.932276	-0.20912	0.689401	-0.303336	0.761634	0.956578
GUSB	97.9643	0.159241	0.326343	0.487956	0.625581	0.911547	0.411659	0.327389	1.2574	0.208608	0.531941	-0.203163	0.328077	-0.619253	0.53575	0.889359
GXYLT1	4.49729	-1.43112	0.825233	-1.7342	0.0828827	0.580754	0.842253	0.715024	1.17794	0.238822	0.563834	-3.59301	1.3328	-2.69584	0.00702122	0.144243
GZMA	0.230908	-1.20941	9.22474	-0.131106	0.895692		-1.41654	9.21419	-0.153735	0.877819		0.797843	9.01264	0.0885249	0.929459
GZMB	0.344475	0	9.22474	0	1		0	9.21431	0	1		0.127487	8.96357	0.0142228	0.988652
GZMK	0.167216	-1.84531	9.22229	-0.200093	0.841408		0.191209	9.21431	0.0207513	0.983444		0	9.01264	0	1
H1F0	62.8072	-0.00380631	0.351103	-0.010841	0.99135	0.998521	0.212385	0.348657	0.609153	0.542423	0.798675	0.0800657	0.348628	0.229659	0.818357	0.973301
H2AFV	75.8757	-0.143927	0.257458	-0.559032	0.57614	0.896412	-0.128432	0.26205	-0.490104	0.62406	0.84069	-0.00332013	0.265844	-0.012489	0.990035	0.998038
H2AFX	8.33312	-0.775922	0.61125	-1.2694	0.204298	0.731087	0.31357	0.611345	0.512918	0.608008	0.83541	-0.493515	0.649665	-0.759644	0.447467	0.863916
H2AFZ	10578	0.154227	0.172696	0.893054	0.371828	0.838369	0.451251	0.172701	2.61291	0.00897747	0.0977054	0.230865	0.168796	1.36772	0.1714	0.662698
HACD3	34.6836	-0.785107	0.411051	-1.91	0.0561334	0.510526	-0.193233	0.416973	-0.46342	0.643064	0.849662	-0.394859	0.40934	-0.964623	0.334733	0.826375
HADH	4.32894	-0.123149	0.797763	-0.154367	0.87732	0.978533	-2.24396	1.13587	-1.97555	0.0482054	0.256567	0.693203	0.914134	0.758316	0.448262	0.864091
HADHA	61.0523	-0.0279529	0.233514	-0.119705	0.904716	0.981959	0.0674473	0.234946	0.287075	0.774055	0.915461	0.116661	0.246215	0.47382	0.635629	0.923447
HAMP	0.294019	-2.05891	9.22087	-0.223288	0.823311		0	9.21431	0	1		0	9.01264	0	1
HAND2	0.1184	0	9.22474	0	1		-2.07556	9.21107	-0.225334	0.82172		0	9.01264	0	1
HAPLN1	0.00918668	0	9.22474	0	1		-0.769729	9.21431	-0.0835363	0.933425		0	9.01264	0	1
HAT1	130.237	0.353519	0.538916	0.655982	0.511836	0.87369	0.679671	0.540885	1.25659	0.208902	0.532009	0.209326	0.532211	0.393313	0.694088	0.939159
HAUS1	67.1975	0.0173396	0.537557	0.0322563	0.974268	0.998359	0.218344	0.541901	0.402922	0.687006	0.870542	-0.526576	0.538835	-0.977249	0.328446	0.818555
HAVCR1	2.36714	-0.674557	1.80942	-0.372802	0.709296	0.934059	2.29626	1.64577	1.39525	0.16294	0.476926	-0.368648	1.71774	-0.214612	0.83007	0.973926
HBA1	0.924742	-2.38365	3.02839	-0.787102	0.431222		-2.77152	3.01252	-0.919999	0.357573	0.669871	-1.87897	2.96584	-0.633537	0.526383
HBA2	2.35753	-2.5017	2.14463	-1.16649	0.243415	0.777915	0.530075	1.85388	0.285927	0.774934	0.915461	-2.33128	2.09122	-1.1148	0.264937	0.77639
HBB	0.662564	2.32104	2.89269	0.802382	0.422332		-2.82676	3.00378	-0.94107	0.346669		-0.141404	2.88765	-0.0489684	0.960945
HBD	0.341104	1.09966	8.8091	0.124832	0.900656		0.642159	8.8331	0.0726992	0.942045		-2.36536	8.64369	-0.273651	0.784353
HBG2	0.0870062	0	9.22474	0	1		0	9.21431	0	1		0	9.01264	0	1
HBQ1	0.0768087	-0.888822	9.22474	-0.096352	0.923241		0	9.21431	0	1		0	9.01264	0	1
HCAR3	0.516491	0.452247	3.60002	0.125623	0.90003		2.06677	3.49241	0.591788	0.553992		-0.860257	3.53621	-0.243271	0.807796
HCK	4.81764	0.0271315	0.885193	0.0306504	0.975548	0.998359	-2.24055	1.03648	-2.1617	0.0306417	0.209321	-0.830307	0.928892	-0.893869	0.371392	0.846821
HCLS1	0.528882	-1.51572	4.28074	-0.354078	0.723281		-1.85333	4.29065	-0.431947	0.66578		-2.02134	4.18588	-0.482894	0.629171
HCST	24.4275	-0.411415	0.501004	-0.821182	0.411542	0.847302	0.379711	0.495114	0.766917	0.443131	0.732615	0.54851	0.495655	1.10664	0.268451	0.77639
HDAC2	15799.7	-0.0193831	0.153308	-0.126433	0.899389	0.979459	-0.216362	0.153306	-1.41131	0.158153	0.473221	-0.0459014	0.149812	-0.306394	0.759305	0.956578
HDAC6	146.644	0.0950734	0.182135	0.521994	0.601674	0.899725	-0.237576	0.183196	-1.29684	0.194686	0.5189	0.2973	0.18127	1.6401	0.100985	0.563913
HDAC9	5.63428	-0.573022	0.75448	-0.759493	0.447558	0.858908	-0.552745	0.76079	-0.726542	0.467507	0.754503	-1.41492	0.886631	-1.59584	0.110524	0.584934
HDGFRP3	1732.69	-0.113467	0.16237	-0.698817	0.484667	0.872575	-0.0540061	0.162064	-0.333239	0.738954	0.899418	0.248468	0.158077	1.57181	0.115993	0.584934
HEATR1	4.29929	-0.973492	0.877788	-1.10903	0.267418	0.797127	-0.240536	0.849585	-0.283122	0.777083	0.915884	1.29217	0.845294	1.52866	0.126349	0.602918
HEBP1	6.53238	-0.543273	0.81765	-0.664431	0.506414	0.872782	-0.415882	0.829351	-0.501455	0.616051	0.837153	-0.994873	0.884975	-1.12418	0.260936	0.77639
HECTD2	56.3203	0.0640919	0.364146	0.176006	0.860289	0.973049	-0.0360189	0.368177	-0.0978303	0.922067	0.973495	0.358117	0.356067	1.00576	0.314532	0.811434
HELLS	49.4805	0.426127	0.492489	0.865252	0.3869	0.838369	0.317151	0.496674	0.63855	0.523116	0.788084	0.226752	0.49053	0.46226	0.643895	0.923759
HERC5	8.37897	-0.37921	0.783595	-0.483936	0.628431	0.911547	2.75526	0.709889	3.88125	0.000103921	0.00337081	0.624045	0.730532	0.854233	0.392976	0.856359
HERC6	0.86332	-0.460379	2.32262	-0.198215	0.842877		-0.392745	2.29105	-0.171426	0.863889	0.95726	0.190998	2.3656	0.0807396	0.935649
HERPUD1	160.225	0.207338	0.242441	0.85521	0.392435	0.838369	0.370777	0.243801	1.52082	0.128305	0.428334	0.241147	0.246445	0.9785	0.327827	0.817923
HES1	6.60777	0.848079	0.575904	1.47261	0.140858	0.668275	0.36911	0.62198	0.593443	0.552884	0.80338	0.0586659	0.610509	0.0960934	0.923446	0.986595
HES3	0.0282541	0	9.22474	0	1		0	9.21431	0	1		-0.426196	9.01264	-0.0472886	0.962283
HES5	9.29035	0.0773759	0.91839	0.0842517	0.932856	0.989056	-2.1033	0.955426	-2.20142	0.0277061	0.198943	-1.18243	0.9136	-1.29425	0.195579	0.693669
HEXA	112.951	-1.2788	0.31818	-4.01912	5.84168e-05	0.00672085	-2.75318	0.343124	-8.02389	1.02452e-15	2.48651e-13	-0.981674	0.298696	-3.28654	0.00101427	0.0369721
HEXB	47.8023	0.730272	0.320569	2.27805	0.0227234	0.353288	1.06788	0.324749	3.28834	0.0010078	0.0207283	0.376876	0.329358	1.14428	0.252509	0.773072
HGF	0.223902	1.63853	9.19423	0.178213	0.858556		-0.768776	9.21431	-0.0834329	0.933507		0	9.01264	0	1
HHIP	4.552	0.312301	1.42186	0.219642	0.82615	0.968652	4.18736	1.05004	3.98783	6.66801e-05	0.0023454	0.76159	1.03412	0.736459	0.461451	0.866778
HIF1A	336.435	0.295666	0.297866	0.992615	0.320898	0.825573	0.473712	0.29745	1.59258	0.111255	0.39884	0.0275155	0.29195	0.0942472	0.924913	0.986595
HIKESHI	348.681	-0.221944	0.309922	-0.716131	0.473911	0.871661	0.339473	0.308723	1.0996	0.271505	0.584168	-0.251341	0.302158	-0.831821	0.40551	0.8617
HIST1H1C	807.539	0.208669	0.374126	0.557751	0.577015	0.896412	1.00789	0.374415	2.69191	0.00710442	0.0824996	0.45719	0.366633	1.247	0.212399	0.71785
HIST1H1E	3727.44	-0.170424	0.238462	-0.714681	0.474806	0.871661	0.0207944	0.238405	0.0872232	0.930494	0.97509	0.228075	0.232851	0.979486	0.32734	0.817923
HIST1H2AC	1372.91	-0.165031	0.268772	-0.614019	0.539203	0.885563	0.143329	0.269074	0.532676	0.594258	0.825327	0.0222401	0.263432	0.0844244	0.932719	0.987429
HIST1H2AE	63.2926	-0.0367687	0.514563	-0.0714561	0.943035	0.992143	0.173567	0.523359	0.331642	0.74016	0.899552	-0.724386	0.530984	-1.36423	0.172494	0.662698
HIST1H2AG	984.371	-0.0712174	0.40134	-0.177449	0.859156	0.973049	0.129946	0.401995	0.323254	0.746503	0.902799	-0.181749	0.39368	-0.461668	0.64432	0.923759
HIST1H2AK	1812.39	-0.0987076	0.270241	-0.365257	0.714919	0.9347	0.195784	0.270469	0.723868	0.469147	0.754552	-0.000111404	0.264769	-0.000420757	0.999664	0.999664
HIST1H2BA	1.58005	-1.20944	1.7075	-0.708307	0.478754	0.871661	-0.417823	1.22674	-0.340597	0.733407	0.897999	-2.43425	1.61803	-1.50445	0.132465	0.612863
HIST1H2BB	1084.12	-0.228586	0.293176	-0.77969	0.435573	0.853589	0.26698	0.293694	0.909042	0.363328	0.672102	0.138129	0.287049	0.481206	0.63037	0.923447
HIST1H2BC	1873.53	-0.190507	0.233388	-0.816266	0.414348	0.847752	-0.135825	0.233833	-0.580864	0.561332	0.808121	0.127073	0.228493	0.556137	0.578117	0.900932
HIST1H2BD	1758.18	-0.111964	0.24546	-0.456138	0.648291	0.91675	0.282284	0.245641	1.14918	0.250484	0.568245	0.0949367	0.240329	0.395028	0.692822	0.939159
HIST1H2BE	56.1921	-0.211027	0.316455	-0.666848	0.504869	0.872575	-0.136689	0.326667	-0.418435	0.675629	0.865095	-0.756009	0.352707	-2.14345	0.0320769	0.326309
HIST1H2BF	150.516	-0.00375934	0.421867	-0.0089112	0.99289	0.998521	0.375567	0.424427	0.884881	0.376221	0.682427	-0.196428	0.422352	-0.465081	0.641873	0.923447
HIST1H2BG	48.0591	-0.351145	0.371461	-0.945309	0.344501	0.829551	-0.680358	0.390583	-1.7419	0.0815255	0.348466	-0.92669	0.397491	-2.33135	0.0197351	0.245478
HIST1H2BH	237.091	-0.204696	0.350017	-0.584816	0.558671	0.89287	0.2151	0.35113	0.612592	0.540146	0.798377	-0.146704	0.344326	-0.426062	0.670062	0.929135
HIST1H2BI	179.637	-0.0958228	0.446503	-0.214607	0.830074	0.968652	0.157372	0.449524	0.350086	0.726274	0.893848	-0.181816	0.442906	-0.410507	0.681434	0.934587
HIST1H2BK	146.204	0.342525	0.493532	0.694029	0.487664	0.872575	0.648009	0.493394	1.31337	0.189058	0.510962	-0.0320766	0.480251	-0.0667914	0.946748	0.991958
HIST1H2BL	417.769	-0.110859	0.40239	-0.275501	0.782931	0.951119	0.292099	0.403512	0.723891	0.469132	0.754552	-0.482672	0.397983	-1.2128	0.225208	0.729722
HIST1H2BM	51.4038	-0.0218733	0.497146	-0.0439977	0.964906	0.998314	-0.0682935	0.507345	-0.134609	0.892921	0.964745	-0.662714	0.513841	-1.28973	0.197146	0.694036
HIST1H2BN	313.973	0.022702	0.362036	0.0627065	0.95	0.993614	0.280233	0.363649	0.770615	0.440935	0.732615	-0.304362	0.359836	-0.845834	0.397645	0.858524
HIST1H3B	387.507	-0.250328	0.27914	-0.896783	0.369835	0.838369	0.195986	0.280815	0.697921	0.485226	0.762229	0.281564	0.274633	1.02524	0.305251	0.809422
HIST1H3C	513.135	-0.418571	0.321026	-1.30385	0.192284	0.721118	0.178985	0.321476	0.556759	0.577692	0.816769	0.224591	0.314285	0.714609	0.474851	0.866778
HIST1H3D	563.945	-0.0896461	0.434699	-0.206226	0.836614	0.968652	0.107434	0.435624	0.246622	0.805201	0.932106	-0.151718	0.426666	-0.355589	0.722148	0.946919
HIST1H3H	954.023	0.00542074	0.328752	0.0164889	0.986844	0.998521	-0.167751	0.329559	-0.509016	0.610741	0.835556	-0.159804	0.322324	-0.495787	0.620045	0.920663
HIST2H2AA4	1802.05	-0.16188	0.248259	-0.652062	0.514361	0.875274	0.12622	0.24854	0.507847	0.61156	0.835556	0.0292444	0.243299	0.120199	0.904325	0.985568
HIST2H2BE	4.03156	-0.998569	0.87769	-1.13772	0.255236	0.786208	-3.27051	1.29768	-2.52027	0.0117266	0.116037	0.0824751	0.908302	0.0908014	0.92765	0.986595
HJURP	1.23593	-3.22768	2.04868	-1.57549	0.115144	0.632075	1.33708	1.79538	0.744734	0.456433	0.743964	-1.73422	2.01308	-0.861475	0.388976
HK1	492.224	0.274928	0.17682	1.55485	0.119982	0.63685	0.343585	0.175917	1.95311	0.0508064	0.264608	0.439402	0.172839	2.54226	0.0110137	0.182582
HK3	0.648372	-0.917315	3.44511	-0.266266	0.790034		-3.17925	3.41255	-0.931634	0.351526		-1.89503	3.36291	-0.563509	0.573088
HLA-A	2.48885	-3.58772	1.66719	-2.15195	0.0314014	0.399197	-1.15491	1.32807	-0.869617	0.38451	0.687371	0.176592	1.31354	0.13444	0.893055	0.983757
HLA-B	0.645063	0.174541	2.5904	0.0673799	0.946279		-2.01428	2.70473	-0.744727	0.456437		-0.197207	2.6848	-0.0734533	0.941445
HLA-C	0.549521	-1.48597	4.83166	-0.307549	0.758425		-2.409	4.81797	-0.500004	0.617072		0	4.72218	0	1
HLA-DMA	0.372143	-0.247664	6.66853	-0.0371392	0.970374		-1.41706	6.66443	-0.21263	0.831616		0.003777	6.51506	0.000579733	0.999537
HLA-DMB	0.624966	-2.90578	2.72927	-1.06467	0.287023		0.00977608	2.66557	0.00366754	0.997074		0.994616	2.62639	0.378701	0.70491
HLA-DPA1	0.402355	-1.60386	4.88612	-0.328249	0.742723		0.687007	4.83509	0.142088	0.887011		-0.474949	4.77447	-0.0994769	0.92076
HLA-DPB1	0.314222	0	6.77335	0	1		-0.769452	6.76921	-0.113669	0.9095		-1.97426	6.61163	-0.298605	0.765242
HLA-DQA1	1.9307	-1.59881	1.53263	-1.04318	0.296864	0.816819	-1.22828	1.58154	-0.776634	0.437375	0.728558	0.0735427	1.44904	0.0507529	0.959522	0.992334
HLA-DQA2	0.147682	0	9.22474	0	1		-1.08986	9.21431	-0.118279	0.905847		-1.24614	9.01221	-0.138272	0.890025
HLA-DQB1	0.701097	-3.9267	3.66371	-1.07178	0.283818		2.88283	3.55889	0.810036	0.41792		-0.988397	3.53829	-0.279343	0.779981
HLA-DRA	0.116774	0.393546	9.22474	0.042662	0.965971		0.190926	9.21431	0.0207206	0.983469		-1.14857	9.01231	-0.127445	0.898588
HLA-DRB1	0.511903	0.92253	2.7184	0.339365	0.734335		-1.41659	2.90183	-0.488172	0.625428		-2.16604	2.81507	-0.769445	0.441629
HLA-DRB3	0.0881048	-0.888822	9.22474	-0.096352	0.923241		0	9.21431	0	1		0	9.01264	0	1
HLA-DRB4	0.335022	-0.647238	9.2235	-0.0701728	0.944056		-1.40484	9.21421	-0.152465	0.878821		0.88467	8.97046	0.0986204	0.92144
HLA-DRB5	0.250979	-2.44141	7.86535	-0.310401	0.756256		-0.76933	7.86631	-0.0978006	0.922091		-0.958081	7.69166	-0.124561	0.900871
HLA-E	103.992	0.0649625	0.284091	0.228668	0.819127	0.967123	-0.168664	0.284202	-0.593466	0.552869	0.80338	0.0688421	0.274864	0.250459	0.802232	0.970484
HLA-F	0.0972563	-1.20941	9.22474	-0.131106	0.895692		0	9.21431	0	1		0	9.01264	0	1
HLA-G	0.310702	0.393588	6.73576	0.0584326	0.953404		1.29114	6.67205	0.193514	0.846556		-1.73159	6.5773	-0.263268	0.792344
HMBS	66.6707	-0.0999702	0.239636	-0.417175	0.67655	0.922077	0.692498	0.235344	2.9425	0.00325575	0.0469132	0.0923667	0.234645	0.393644	0.693844	0.939159
HMG20B	9.05304	0.214982	0.594275	0.361755	0.717535	0.935968	-1.16768	0.646741	-1.80548	0.0709989	0.323291	0.11057	0.56644	0.195201	0.845235	0.978601
HMGA2	194.281	0.158959	0.192721	0.824814	0.409477	0.846547	0.41488	0.190971	2.17247	0.0298199	0.208122	0.430986	0.18695	2.30535	0.0211469	0.253084
HMGCR	170.696	-0.521984	0.365906	-1.42655	0.153709	0.677503	-0.0587681	0.365373	-0.160844	0.872216	0.959329	-0.0129706	0.359577	-0.0360719	0.971225	0.993077
HMGCS1	10.2739	-1.44848	0.542704	-2.66901	0.00760745	0.19236	-0.965673	0.56584	-1.70662	0.0878927	0.362577	-0.551517	0.524813	-1.05088	0.293313	0.800434
HMGCS2	0.161188	0	9.22474	0	1		-0.769129	9.21431	-0.0834712	0.933477		-0.284402	9.01221	-0.0315574	0.974825
HMMR	280.583	0.13914	0.217292	0.640337	0.521953	0.880409	1.52045	0.209168	7.26904	3.62038e-13	6.27619e-11	1.8015	0.204833	8.79493	1.43131e-18	1.60164e-15
HMOX1	82.0621	-0.53189	0.249509	-2.13175	0.0330276	0.408243	-0.401876	0.242301	-1.65858	0.0972004	0.377322	0.23871	0.230989	1.03343	0.301405	0.807837
HN1L	198.571	-0.11915	0.237715	-0.501231	0.616209	0.907744	-0.0959084	0.235601	-0.40708	0.683949	0.870448	0.356249	0.230345	1.54659	0.121963	0.595966
HNF1A	0.203178	0.393505	9.22474	0.0426576	0.965974		0	9.21431	0	1		-0.426196	9.01264	-0.0472886	0.962283
HNF4A	0.0248359	0	9.22474	0	1		0	9.21431	0	1		0	9.01264	0	1
HNRNPF	1.62083	-1.45268	1.22398	-1.18685	0.235287	0.773422	-0.370594	1.10715	-0.334728	0.73783	0.899418	0.821439	1.1884	0.691215	0.489431	0.871683
HNRNPM	1774.54	0.0681679	0.12677	0.537728	0.590765	0.898908	-0.0837124	0.126679	-0.660825	0.508725	0.782871	0.0765738	0.123997	0.617544	0.536876	0.889359
HOMER1	183.128	0.215741	0.447765	0.481818	0.629935	0.911547	0.0498699	0.448599	0.111168	0.911483	0.968975	0.0986655	0.440622	0.223923	0.822817	0.973301
HOMER2	9.01327	0.785177	0.473745	1.65738	0.0974423	0.602728	-0.112409	0.463154	-0.242703	0.808235	0.933645	-0.489	0.527242	-0.927468	0.353684	0.83535
HOOK2	0.875147	0.499875	2.35433	0.212322	0.831856		-2.40706	2.47809	-0.971335	0.331382	0.645006	-0.525985	2.33378	-0.225379	0.821685
HOXA1	0.100599	-2.0283	9.22109	-0.219963	0.8259		-0.769472	9.21431	-0.0835084	0.933447		0	9.01264	0	1
HOXA10	0.604025	-2.32048	2.83044	-0.81983	0.412313		1.20934	2.73876	0.441565	0.658804		0.110785	2.6991	0.041045	0.96726
HOXA2	0.0989009	-2.19329	9.21997	-0.237884	0.811971		0	9.21431	0	1		0	9.01264	0	1
HOXA3	0.011749	0	9.22474	0	1		0	9.21431	0	1		0.797843	9.01264	0.0885249	0.929459
HOXA5	0.257187	-0.888822	9.22474	-0.096352	0.923241		-1.4051	9.21421	-0.152493	0.878798		3.13866	8.94761	0.350782	0.725752
HOXA9	0.280667	-1.20941	9.22474	-0.131106	0.895692		-1.72495	9.21326	-0.187225	0.851484		-1.62674	9.0107	-0.180535	0.856733
HOXB1	0.123574	1.2603	9.20767	0.136875	0.89113		-0.769056	9.21431	-0.0834632	0.933483		0	9.01264	0	1
HOXB13	0.204508	1.5542	9.19693	0.168991	0.865804		-1.08966	9.21431	-0.118257	0.905864		-0.95814	9.01254	-0.106312	0.915335
HOXB2	0.0203311	0	9.22474	0	1		0	9.21431	0	1		0	9.01264	0	1
HOXB3	0.307672	-2.1124	7.72635	-0.273403	0.784544		-1.70659	7.72409	-0.220944	0.825136		-1.44146	7.55262	-0.190856	0.848639
HOXC11	0.191374	0	9.22474	0	1		-1.08954	9.21431	-0.118245	0.905874		-0.426196	9.01264	-0.0472886	0.962283
HOXD10	1.03697	0.180814	2.04719	0.0883229	0.92962		0.269822	2.32012	0.116296	0.907418	0.966646	0.502457	2.04681	0.245483	0.806082
HOXD4	1.19272	-0.6972	1.74016	-0.400652	0.688676		-3.81246	1.96696	-1.93825	0.0525928	0.269872	-1.11982	1.87937	-0.595847	0.551277
HOXD8	1.4597	0.835662	1.74344	0.479317	0.631713	0.911547	-1.04719	1.88724	-0.554877	0.578978	0.817441	-2.85982	1.93	-1.48177	0.138402
HP	0.164546	1.31794	9.19423	0.143344	0.886018		-1.08984	9.21431	-0.118276	0.905849		-1.24614	9.01221	-0.138272	0.890025
HPN	3.01225	-1.1861	1.11144	-1.06718	0.285892	0.807644	-1.65242	1.20391	-1.37255	0.169893	0.483955	1.46363	1.01969	1.43536	0.151184	0.634802
HPR	0.184161	0	9.22474	0	1		-1.08958	9.21431	-0.118248	0.905871		-0.426196	9.01264	-0.0472886	0.962283
HPRT1	58.5815	0.0397512	0.345444	0.115073	0.908387	0.982809	0.469605	0.34402	1.36505	0.172236	0.4872	0.324606	0.344431	0.942441	0.345967	0.830795
HS2ST1	430.074	0.211309	0.226005	0.934974	0.349802	0.829897	0.0681911	0.226556	0.30099	0.763422	0.910651	0.117468	0.222997	0.526768	0.598354	0.913922
HS6ST2	59.7139	0.231309	0.303214	0.762857	0.445549	0.856969	2.07864	0.286457	7.25638	3.97595e-13	6.43309e-11	1.17729	0.287408	4.09623	4.19941e-05	0.00261064
HSD11B2	1.88517	-2.48301	1.71702	-1.44611	0.148145	0.677112	1.05306	1.52162	0.692069	0.488894	0.765666	-0.672128	1.50531	-0.446504	0.655233	0.927999
HSD17B10	26.7929	-0.0709373	0.384173	-0.184649	0.853504	0.972549	0.189044	0.391973	0.482289	0.629601	0.844222	-0.679802	0.419735	-1.6196	0.105319	0.572096
HSD17B11	121.298	0.0434586	0.406849	0.106817	0.914934	0.984228	-0.226641	0.408354	-0.555012	0.578886	0.817441	-0.659151	0.405017	-1.62746	0.103639	0.5671
HSD17B8	29.2118	-1.31015	0.296666	-4.41624	1.00434e-05	0.00177769	-0.702345	0.305652	-2.29786	0.0215697	0.17052	-0.614602	0.297068	-2.06889	0.0385561	0.368754
HSD3B1	0.273785	0	8.99077	0	1		0	8.98111	0	1		-0.226948	8.7679	-0.0258839	0.97935
HSD3B2	0.184449	0	9.22474	0	1		0	9.21431	0	1		1.76232	8.99089	0.196011	0.844601
HSF1	161.624	0.369372	0.188658	1.95789	0.0502431	0.500307	0.527697	0.18558	2.84351	0.00446203	0.0588551	0.425557	0.182504	2.33176	0.0197131	0.245478
HSF2	78.6312	0.00864268	0.223474	0.0386743	0.96915	0.998359	0.444443	0.223702	1.98676	0.0469491	0.252524	0.582953	0.22696	2.56852	0.0102133	0.17186
HSP90AA1	1629.32	0.426982	0.297482	1.43532	0.151195	0.677112	0.405395	0.297422	1.36303	0.172873	0.487296	0.306189	0.290933	1.05244	0.292598	0.80003
HSP90AA2P	0.089921	0	9.22474	0	1		0	9.21431	0	1		0	9.01264	0	1
HSP90AB1	2342.7	0.24423	0.166562	1.4663	0.142567	0.669485	0.367551	0.166378	2.20913	0.0271653	0.196806	0.312899	0.162923	1.92053	0.0547904	0.441083
HSP90B1	298.522	0.345784	0.519833	0.665183	0.505933	0.872678	-0.113884	0.52212	-0.218119	0.827337	0.943735	-0.671012	0.513173	-1.30757	0.191018	0.688207
HSPA13	38.7527	-0.211673	0.306929	-0.689648	0.490415	0.872575	-0.275401	0.299345	-0.920013	0.357566	0.669871	-0.894969	0.331911	-2.69641	0.00700916	0.144243
HSPA1A	0.881995	1.58919	1.89823	0.837198	0.402481		-1.97938	2.13094	-0.928878	0.352952	0.6666	-1.02716	2.07228	-0.495668	0.620129
HSPA1B	70.0823	-1.25208	0.548839	-2.28132	0.0225293	0.352653	0.70577	0.512384	1.37742	0.168381	0.482448	0.0229513	0.533733	0.0430015	0.9657	0.993077
HSPA1L	0.482681	-1.81333	5.34092	-0.339516	0.734221		-2.46308	5.32918	-0.462187	0.643947		-1.50766	5.21986	-0.288831	0.772711
HSPA2	120.991	-1.35572	0.69644	-1.94664	0.0515779	0.500307	-0.734471	0.69115	-1.06268	0.287927	0.603975	-0.205297	0.673247	-0.304936	0.760415	0.956578
HSPA4	906.299	0.469941	0.224307	2.09508	0.0361641	0.423659	0.517469	0.224174	2.30833	0.0209806	0.166951	0.387634	0.219657	1.76472	0.0776103	0.50639
HSPA5	387.126	-0.38022	0.21389	-1.77764	0.0754628	0.570221	-0.502026	0.214665	-2.33865	0.0193535	0.160041	-0.0711633	0.208659	-0.341051	0.733065	0.951072
HSPA6	22.5806	-0.247649	2.24896	-0.110117	0.912317	0.982809	-2.8492	2.19899	-1.29568	0.195085	0.5189	0.797913	2.19725	0.363141	0.716499	0.946919
HSPA8	1718.03	-0.389745	0.165676	-2.35246	0.0186499	0.325102	0.99424	0.164635	6.03906	1.55019e-09	1.71014e-07	0.125279	0.161727	0.774634	0.438556	0.8617
HSPA9	5.08382	-0.717064	0.908376	-0.789391	0.429883	0.852726	-0.132867	0.892035	-0.148949	0.881594	0.962929	0.795488	0.982899	0.809328	0.418326	0.8617
HSPB1	256.915	0.10777	0.179042	0.601924	0.547225	0.88736	0.10778	0.177463	0.607339	0.543626	0.798675	0.104437	0.178197	0.586075	0.557825	0.894275
HSPB8	1.58498	-1.20944	2.31648	-0.522101	0.6016	0.899725	-1.50337	2.28405	-0.658206	0.510406	0.782871	0.657285	2.08331	0.315499	0.752382	0.955361
HSPBAP1	6.48916	-0.200412	0.69295	-0.289216	0.772416	0.951119	0.12276	0.721316	0.170188	0.864862	0.95726	-0.823455	0.782707	-1.05206	0.292772	0.80003
HSPD1	351.228	0.622009	0.388317	1.60181	0.109198	0.613902	0.785195	0.388564	2.02076	0.0433046	0.246578	0.395526	0.382416	1.03428	0.301005	0.807734
HSPE1	2479.69	0.252164	0.43569	0.578771	0.562744	0.89425	1.04923	0.435722	2.40803	0.016039	0.144708	-0.0569552	0.426054	-0.133681	0.893655	0.983757
HSPG2	2.42846	0.433351	1.24917	0.346912	0.728657	0.939788	0.411748	1.28976	0.319243	0.749542	0.902799	0.300821	1.27067	0.236742	0.812857	0.972821
HTATSF1	2607.07	-0.0880629	0.290373	-0.303275	0.76168	0.948823	-0.264682	0.290267	-0.911858	0.361844	0.672102	0.27127	0.283508	0.956832	0.338652	0.826375
HTR1B	0.168136	-2.19328	9.21997	-0.237883	0.811972		-0.769255	9.21431	-0.0834848	0.933466		-0.426196	9.01264	-0.0472886	0.962283
HTR5A	0.474299	-3.12515	5.90582	-0.529164	0.596691		0.401117	5.87863	0.0682331	0.9456		2.12425	5.7156	0.371658	0.710147
HTR6	0.388198	-1.60712	6.63394	-0.242258	0.80858		0	6.63178	0	1		-0.688497	6.4831	-0.106199	0.915425
HTRA1	1.86471	-3.06753	1.59425	-1.92413	0.0543387	0.505936	-3.23971	1.58693	-2.0415	0.0412014	0.243796	-1.49113	1.31595	-1.13312	0.257162	0.775308
HYOU1	87.6897	0.202812	0.325754	0.622591	0.533554	0.885533	0.0137384	0.326677	0.0420551	0.966455	0.986203	0.249371	0.322823	0.772468	0.439837	0.8617
IARS	9.20459	-0.529892	0.580391	-0.912991	0.361247	0.836613	0.196083	0.597609	0.328112	0.742827	0.90097	-0.711207	0.650169	-1.09388	0.274008	0.781096
IARS2	47.9713	0.570843	0.559874	1.01959	0.307922	0.820497	0.691816	0.565042	1.22436	0.220816	0.54011	0.109328	0.559671	0.195343	0.845125	0.978601
ICAM1	0.268126	-2.19328	9.21997	-0.237883	0.811972		0	9.21431	0	1		-1.26575	9.01219	-0.140448	0.888306
ICAM3	0.204886	-0.888822	9.22474	-0.096352	0.923241		-1.41688	9.21419	-0.153771	0.87779		-0.426196	9.01264	-0.0472886	0.962283
ICE1	27.7733	0.819004	0.585228	1.39946	0.161675	0.688914	0.620195	0.586044	1.05827	0.28993	0.605561	0.294778	0.584806	0.504061	0.614218	0.920182
ICMT	7.50022	-0.274417	0.592865	-0.462866	0.643461	0.913952	-0.572553	0.627006	-0.913153	0.361162	0.672102	0.698052	0.577417	1.20892	0.226693	0.732091
ID1	91.9107	-0.16826	0.502813	-0.334637	0.737899	0.944401	-0.635006	0.503798	-1.26044	0.207511	0.531941	-0.469837	0.493814	-0.951446	0.341378	0.829537
ID2	15.4234	-0.567903	0.504566	-1.12553	0.260366	0.791857	0.964068	0.488523	1.97343	0.0484461	0.257284	-1.08956	0.605568	-1.79924	0.0719808	0.497284
ID3	0.322078	-1.96202	8.91219	-0.22015	0.825755		-0.768564	8.90604	-0.0862969	0.93123		1.82294	8.66884	0.210286	0.833444
IDE	163.888	0.200246	0.201045	0.996023	0.319239	0.824432	0.32966	0.200832	1.64148	0.100699	0.381327	0.267641	0.19552	1.36887	0.171041	0.662698
IDH3A	379.395	0.600555	0.248879	2.41304	0.0158199	0.30084	0.675575	0.248951	2.71368	0.00665397	0.0799465	0.527283	0.245372	2.14891	0.0316416	0.324835
IDI1	661.176	-0.00890053	0.368706	-0.0241399	0.980741	0.998359	0.317089	0.368641	0.860157	0.389703	0.691227	0.109459	0.360738	0.303431	0.761561	0.956578
IDO1	0.395741	-0.641847	4.79897	-0.133747	0.893603		-1.40624	4.7997	-0.292985	0.769533		3.25364	4.5677	0.712315	0.47627
IER2	1616.98	-0.318144	0.422975	-0.752158	0.451956	0.86303	-0.970631	0.423083	-2.29419	0.0217797	0.171347	-0.18545	0.413222	-0.448792	0.653582	0.927978
IER3	11.8442	-0.387258	0.568823	-0.680806	0.495994	0.872575	0.793891	0.557803	1.42325	0.154664	0.470043	-0.721266	0.581489	-1.24038	0.214836	0.717936
IFI27	3.02126	1.12922	0.828384	1.36316	0.172834	0.703944	-0.686183	0.911181	-0.75307	0.451408	0.738709	0.311953	0.976434	0.319482	0.749361	0.954587
IFI30	1.22241	-2.44573	1.91453	-1.27746	0.201439	0.728797	-1.0909	1.94833	-0.559916	0.575537	0.815728	0.678731	1.63676	0.41468	0.678376
IFI44	199.541	0.780812	0.276096	2.82804	0.00468335	0.145683	0.572462	0.276404	2.0711	0.0383491	0.237432	0.624276	0.270312	2.30947	0.0209177	0.253084
IFI44L	588.222	0.201896	0.263747	0.765489	0.44398	0.856969	0.203217	0.263561	0.771043	0.440681	0.732615	0.365051	0.25774	1.41635	0.156673	0.648121
IFI6	263.416	-0.444886	0.187804	-2.36888	0.0178419	0.315801	-0.17963	0.187816	-0.956412	0.338864	0.653755	0.160698	0.182232	0.881836	0.377866	0.849392
IFIT1	1.71974	1.97607	1.38811	1.42357	0.15457	0.677503	-1.70416	1.44348	-1.18059	0.237766	0.56272	2.52793	1.29744	1.9484	0.0513675	0.426111
IFIT2	0.335215	0	9.22474	0	1		0.867233	9.20433	0.0942202	0.924934		-1.53173	9.0113	-0.169979	0.865027
IFIT3	0.577283	0.579378	3.03573	0.190853	0.848641		0.244874	3.14447	0.0778746	0.937928		-0.623386	3.09887	-0.201166	0.840569
IFITM1	237.73	0.311544	0.402214	0.774574	0.438591	0.853589	0.286257	0.40324	0.709893	0.477771	0.759598	-0.126618	0.39644	-0.319388	0.749432	0.954587
IFITM2	918.91	0.266616	0.259113	1.02896	0.3035	0.820497	-0.0920206	0.259533	-0.354562	0.722918	0.893341	-0.138871	0.254369	-0.545943	0.585105	0.905283
IFITM3	2241.34	0.116519	0.159973	0.728367	0.466389	0.871661	-0.166218	0.160175	-1.03773	0.299397	0.616831	-0.162686	0.157125	-1.03539	0.300486	0.807308
IFNA1	0.323426	-3.42891	9.2097	-0.372315	0.709658		0	9.21431	0	1		0.39113	8.98953	0.0435095	0.965295
IFNAR1	28.0029	0.601724	0.45423	1.32471	0.185266	0.716467	-0.00205317	0.464234	-0.00442272	0.996471	0.997704	0.377549	0.46591	0.810348	0.41774	0.8617
IFNB1	0.105631	-0.888822	9.22474	-0.096352	0.923241		0	9.21431	0	1		-0.688499	9.01264	-0.0763926	0.939107
IFNG	0.120549	0	9.22474	0	1		0	9.21431	0	1		0	9.01264	0	1
IFNGR1	3.31459	-1.44812	0.970589	-1.492	0.1357	0.663441	0.657876	0.892353	0.737238	0.460978	0.748357	-0.373233	0.871307	-0.42836	0.668389	0.929135
IFRD1	350.396	0.237779	0.466127	0.510115	0.609971	0.9026	0.269042	0.466608	0.576591	0.564216	0.808354	-0.173144	0.457024	-0.378852	0.704798	0.942297
IFRD2	28.5085	-0.271029	0.407031	-0.665869	0.505495	0.872575	0.793498	0.399161	1.98792	0.0468209	0.252524	0.559406	0.398332	1.40437	0.160208	0.654968
IGF1	4.76356	0.160689	0.65014	0.24716	0.804784	0.960481	-0.431526	0.706934	-0.610419	0.541584	0.798675	-0.998027	0.687116	-1.45249	0.146366	0.629738
IGF1R	276.496	0.0591852	0.228194	0.259363	0.795355	0.957672	-0.35867	0.227547	-1.57625	0.114969	0.407938	0.409969	0.222667	1.84118	0.0655954	0.479747
IGF2BP2	46.3724	0.637899	0.387578	1.64586	0.099793	0.60503	-0.015496	0.395472	-0.0391837	0.968744	0.986583	-0.087388	0.394994	-0.221239	0.824907	0.973301
IGF2R	1912.7	0.086819	0.358675	0.242055	0.808738	0.962206	-0.276189	0.358497	-0.770409	0.441057	0.732615	0.331223	0.350075	0.946147	0.344074	0.830795
IGFBP1	0.392843	-0.24761	5.97342	-0.0414519	0.966936		0.401754	5.88675	0.0682472	0.945589		-1.24509	5.83541	-0.213369	0.831039
IGFBP2	7689.77	-0.376615	0.522455	-0.720857	0.470997	0.871661	-1.49115	0.522502	-2.85387	0.00431903	0.057595	-0.5452	0.510471	-1.06803	0.285505	0.791773
IGFBP3	1.82789	-3.24156	1.76902	-1.8324	0.0668911	0.536294	1.60339	1.41438	1.13364	0.256946	0.574746	-0.39732	1.67255	-0.237554	0.812227	0.972821
IGFBP4	48.8366	0.328855	0.310417	1.0594	0.289418	0.809223	1.01709	0.306125	3.32246	0.000892288	0.0189963	1.06825	0.30012	3.5594	0.000371705	0.0166375
IGFBP6	0.748628	-0.302835	2.48851	-0.121694	0.903142		0.255985	2.67852	0.0955695	0.923863		0.705816	2.45596	0.287389	0.773814
IGFBP7	0.107952	0	9.22474	0	1		1.43492	9.19509	0.156053	0.875991		-1.53312	9.01129	-0.170134	0.864905
IGHG2	0.029246	0	9.22474	0	1		0	9.21431	0	1		0	9.01264	0	1
IGHG3	0.539258	0.903172	4.88635	0.184836	0.853358		-0.769776	4.93637	-0.15594	0.87608		-0.0369392	4.70732	-0.00784719	0.993739
IGHMBP2	53.0223	-0.142845	0.489129	-0.292039	0.770257	0.951119	-1.06617	0.492276	-2.16579	0.0303269	0.209321	0.129507	0.473582	0.273462	0.784498	0.96299
IGHV3	2.77142	-1.49904	1.76385	-0.849868	0.395399	0.838537	-2.28346	1.73702	-1.31459	0.188649	0.510425	-0.395557	1.36901	-0.288936	0.77263	0.959571
IGHV4	1.80154	-2.31902	1.53166	-1.51406	0.130011	0.651757	-2.55804	1.53675	-1.66458	0.0959962	0.375173	-3.23965	1.64215	-1.97281	0.0485175	0.415399
IGK	0.111351	-2.19327	9.21997	-0.237882	0.811973		0.511346	9.21431	0.0554948	0.955744		0.273281	9.01264	0.0303219	0.97581
IGKC	3.70537	-2.08179	1.35333	-1.53828	0.123981	0.637173	0.155931	1.29356	0.120544	0.904052	0.965113	-1.1593	1.23739	-0.936889	0.348815	0.831867
IGKV1	1.05131	-2.41632	2.5824	-0.935687	0.349434		-2.76567	2.54107	-1.08839	0.276423	0.589524	-2.37224	2.49372	-0.951286	0.341459
IGKV3D	0.339504	-1.23153	9.21997	-0.133572	0.893741		-1.08921	9.21431	-0.118209	0.905902		-0.688499	9.01264	-0.0763926	0.939107
IGKV4-1	0.100264	0	9.22474	0	1		0	9.21431	0	1		-1.56445	9.01112	-0.173614	0.862169
IGL	0.532511	-0.0281079	9.17214	-0.00306449	0.997555		0	9.21431	0	1		-0.688499	9.01264	-0.0763926	0.939107
IGLL5	0.00918668	0	9.22474	0	1		-0.769729	9.21431	-0.0835363	0.933425		0	9.01264	0	1
IGLV1	0.534765	-0.639776	4.24336	-0.150771	0.880156		0.426571	4.20602	0.101419	0.919218		1.24062	4.03329	0.307595	0.758391
IGLV2	3.11561	-0.260285	0.861075	-0.302279	0.76244	0.948823	0.29877	0.895842	0.333507	0.738752	0.899418	-1.02486	1.05898	-0.967781	0.333154	0.825689
IGSF6	0.126978	0	9.22474	0	1		2.34287	9.16308	0.255686	0.798193		0	9.01264	0	1
IKBIP	128.162	0.897649	0.24844	3.61314	0.000302513	0.0240029	2.36254	0.244788	9.65138	4.84975e-22	1.68148e-19	0.760191	0.244522	3.10889	0.00187794	0.0609107
IKBKAP	716.548	0.139719	0.160481	0.870627	0.383958	0.838369	-0.0113873	0.160012	-0.0711656	0.943266	0.979166	0.215374	0.156259	1.37832	0.168105	0.660739
IKBKB	26.0815	0.520512	0.397771	1.30857	0.19068	0.721118	0.56065	0.39835	1.40743	0.1593	0.473221	0.529601	0.395162	1.34021	0.180176	0.672203
IKBKE	1.17521	-1.50785	1.50494	-1.00193	0.316375		-1.62024	1.7917	-0.904303	0.365835	0.672859	1.17897	1.38229	0.852911	0.393708
IKBKG	74.2997	-0.345228	0.250515	-1.37808	0.168179	0.699785	-0.0666322	0.241835	-0.275527	0.782911	0.917928	0.168041	0.237538	0.707428	0.4793	0.86913
IKZF1	12.8074	-1.48304	0.519174	-2.85654	0.00428281	0.140225	-0.310247	0.466577	-0.664943	0.506087	0.780351	-0.693052	0.460757	-1.50416	0.13254	0.612863
IL10	0.53162	1.03229	3.76499	0.274182	0.783945		-0.770038	3.90557	-0.197164	0.843699		-2.5944	3.79247	-0.684094	0.493916
IL10RA	0.108702	-1.60897	9.2235	-0.174443	0.861518		0	9.21431	0	1		0	9.01264	0	1
IL11	0.679917	1.05468	2.72485	0.387062	0.69871		0.227393	2.70016	0.0842146	0.932886		-2.89126	2.76283	-1.04648	0.295338
IL12RB1	0.555	-1.20942	8.23655	-0.146836	0.883262		-0.768751	8.22912	-0.0934184	0.925571		-1.24596	8.04669	-0.154841	0.876946
IL13	0.448548	2.22902	4.40992	0.505457	0.613238		-1.0905	4.51498	-0.241528	0.809146		-0.957596	4.41215	-0.217036	0.82818
IL13RA1	3.78561	-0.483713	0.867282	-0.557735	0.577025	0.896412	-1.45321	1.02477	-1.41809	0.156166	0.470043	-0.272101	0.954889	-0.284956	0.775678	0.960328
IL13RA2	0.125933	-0.888781	9.22474	-0.0963476	0.923245		0.190934	9.21431	0.0207215	0.983468		-0.426151	9.01264	-0.0472837	0.962287
IL15	0.395017	-2.18208	6.77607	-0.322028	0.747432		-2.49312	6.76712	-0.368417	0.712562		-0.683561	6.62372	-0.103199	0.917805
IL18	0.286537	-0.888822	9.22474	-0.096352	0.923241		-1.0894	9.21431	-0.118229	0.905886		1.44312	8.96209	0.161025	0.872074
IL18R1	0.175274	-0.888822	9.22474	-0.096352	0.923241		-0.769048	9.21431	-0.0834624	0.933484		2.08528	8.97241	0.232411	0.816219
IL18RAP	0.298222	0	9.22474	0	1		0	9.21431	0	1		-2.29741	9.00498	-0.255127	0.798625
IL19	0.0321121	0	9.22474	0	1		0	9.21431	0	1		0	9.01264	0	1
IL1A	0.203044	-1.20941	9.22474	-0.131106	0.895692		0	9.21431	0	1		1.68052	8.96272	0.187502	0.851267
IL1B	0.343135	0.46863	8.74154	0.0536095	0.957246		-1.39109	8.78363	-0.158373	0.874163		0.999452	8.56638	0.116671	0.90712
IL1R1	0.508284	-1.60897	9.2235	-0.174443	0.861517		-0.768782	9.21431	-0.0834335	0.933507		-0.681495	9.01059	-0.0756327	0.939711
IL1RN	0.161532	0	9.22474	0	1		-1.58255	9.21374	-0.17176	0.863626		-1.24614	9.01221	-0.138272	0.890025
IL20	0.3171	-2.21976	9.2198	-0.24076	0.809741		1.42787	9.18419	0.15547	0.876451		-1.51484	9.0114	-0.168103	0.866502
IL23A	2.56994	-2.71406	1.47177	-1.84409	0.0651707	0.529245	1.72521	1.16762	1.47754	0.13953	0.448205	-0.00452143	1.17365	-0.00385246	0.996926	0.999199
IL2RB	0.238458	-1.63948	9.2234	-0.177752	0.858918		-1.08962	9.21431	-0.118253	0.905867		-1.49758	9.0115	-0.166186	0.868011
IL2RG	0.162598	-0.888719	9.22474	-0.0963408	0.92325		1.3338	9.17767	0.145331	0.884449		-0.426083	9.01264	-0.0472762	0.962293
IL36B	0.102241	0	9.22474	0	1		0	9.21431	0	1		-0.688499	9.01264	-0.0763926	0.939107
IL36G	0.429173	1.09884	5.87331	0.18709	0.85159		2.16491	5.86527	0.369108	0.712048		-0.68844	5.80658	-0.118562	0.905622
IL4	0.72572	-1.20942	3.39371	-0.356371	0.721563		1.86074	3.22768	0.576494	0.564281		0.535623	3.31568	0.161542	0.871666
IL4R	2.25273	-0.533399	1.08682	-0.490789	0.623575	0.911547	0.194803	1.09349	0.178148	0.858607	0.955889	0.237208	1.17033	0.202684	0.839382	0.977843
IL6	0.34774	0.686943	5.92559	0.115928	0.90771		0	5.99149	0	1		-0.426191	5.85653	-0.0727719	0.941988
IL7R	0.301763	-2.83397	9.21483	-0.307544	0.758429		-2.04695	9.21135	-0.22222	0.824142		-0.958145	9.01254	-0.106313	0.915334
ILF2	678.312	0.243847	0.286235	0.851911	0.394263	0.838369	0.341687	0.286382	1.19312	0.232824	0.55418	0.312037	0.279891	1.11485	0.264915	0.77639
ILK	2811.91	-0.194618	0.370008	-0.525982	0.598901	0.899725	-0.948093	0.370103	-2.5617	0.0104162	0.106667	-0.289811	0.361498	-0.801693	0.422731	0.8617
INA	670.548	-0.514044	0.579179	-0.887539	0.374789	0.838369	-1.30002	0.579444	-2.24357	0.0248604	0.186799	-0.508297	0.565505	-0.898837	0.368739	0.843619
INHA	0.496234	0	6.6235	0	1		-3.55396	6.59591	-0.538812	0.590016		0.710848	6.43866	0.110403	0.91209
INHBA	0.783725	-2.2166	2.71992	-0.81495	0.415101		-0.724769	2.70259	-0.268176	0.788564	0.920118	-2.07779	2.68239	-0.774604	0.438574
INHBE	37.2476	-0.56769	0.715846	-0.793033	0.427759	0.852379	-0.531114	0.727242	-0.730312	0.465199	0.752191	-1.29223	0.722447	-1.78868	0.073666	0.497284
INPP1	10.4385	-0.216002	0.558904	-0.386474	0.699146	0.932457	1.4242	0.542771	2.62393	0.00869204	0.0954551	-0.293498	0.641626	-0.457428	0.647364	0.925573
INPP4B	30.1515	-0.323496	0.341752	-0.946582	0.343852	0.829551	0.158196	0.327335	0.483284	0.628894	0.843757	0.360195	0.320834	1.12268	0.261573	0.77639
INS	1.72369	0.358087	1.47838	0.242215	0.808613	0.962206	-0.395022	1.51984	-0.25991	0.794933	0.923995	-2.36287	1.62999	-1.44962	0.147164	0.629738
INSC	0.0547857	0	9.22474	0	1		-0.769563	9.21431	-0.0835183	0.933439		-0.426196	9.01264	-0.0472886	0.962283
INSIG1	209.972	-1.26725	0.329591	-3.8449	0.0001206	0.0111	-0.380924	0.325601	-1.16991	0.242037	0.565283	0.0273734	0.319834	0.085586	0.931795	0.986918
INSL3	0.169087	-2.55448	9.21755	-0.277133	0.781678		0	9.21431	0	1		-0.958145	9.01254	-0.106313	0.915334
INSM1	98.5115	0.0536927	0.377242	0.142329	0.88682	0.979283	-0.768339	0.379981	-2.02205	0.0431714	0.246578	-0.0114293	0.373274	-0.0306189	0.975573	0.996713
INTS3	10.7742	0.205384	0.529159	0.388133	0.697917	0.932457	-0.684676	0.560373	-1.22182	0.221775	0.540115	0.553538	0.507868	1.08993	0.275746	0.782727
IPO13	14.9945	-0.559077	0.495142	-1.12912	0.258846	0.790814	-0.436731	0.505051	-0.864728	0.387188	0.688286	0.0837913	0.496544	0.168749	0.865994	0.983757
IPO5	143.439	0.24972	0.293308	0.851392	0.394551	0.838369	0.49981	0.294324	1.69816	0.089477	0.366207	0.0835174	0.294391	0.283695	0.776644	0.960328
IQGAP1	171.647	0.314522	0.259206	1.2134	0.224975	0.769941	0.459654	0.257666	1.78392	0.0744374	0.33332	0.622953	0.252676	2.46542	0.0136852	0.213258
IRAK2	0.598779	-0.574024	4.30633	-0.133298	0.893958		-0.129088	4.43403	-0.029113	0.976774		0.273296	4.33322	0.0630701	0.949711
IRF1	4.88891	-1.14636	0.902597	-1.27007	0.204061	0.731087	-1.09996	0.888535	-1.23795	0.215733	0.537561	0.273747	0.81178	0.337218	0.735953	0.95261
IRF7	37.5276	0.207922	0.398857	0.521293	0.602163	0.899725	-0.0219086	0.394595	-0.0555218	0.955723	0.983017	0.389039	0.391757	0.993062	0.32068	0.811616
IRF8	0.22748	0	9.22474	0	1		0	9.21431	0	1		0	9.01264	0	1
IRS1	18.6203	1.53495	0.397463	3.86187	0.000112525	0.0111	-0.287803	0.411512	-0.69938	0.484315	0.762229	0.125501	0.417307	0.300741	0.763612	0.95703
IRX5	0.635159	-3.12403	3.62441	-0.86194	0.38872		-0.819825	3.58485	-0.228692	0.819108		-1.59582	3.56822	-0.44723	0.654709
ISG15	4.74299	-0.0729704	0.68801	-0.10606	0.915535	0.984414	-0.300437	0.672584	-0.44669	0.655099	0.855797	-0.992014	0.761205	-1.30322	0.192501	0.688207
ISG20	1.47567	3.1005	1.41662	2.18866	0.0286212	0.380679	-1.16114	1.59837	-0.726452	0.467562	0.754503	-0.319921	1.46961	-0.217691	0.82767
ISL1	15.3794	-1.22608	0.499836	-2.45296	0.0141687	0.281054	-1.04495	0.480933	-2.17276	0.0297981	0.208122	-0.121478	0.469142	-0.258937	0.795684	0.969068
ISOC1	20.3988	0.0295843	0.391449	0.0755763	0.939756	0.992143	0.0593632	0.394552	0.150457	0.880404	0.962496	0.103281	0.390554	0.264448	0.791434	0.967357
ITFG1	27.1634	-0.0230842	0.38942	-0.0592784	0.95273	0.995527	-0.0399772	0.400637	-0.0997841	0.920516	0.973091	-0.0099844	0.412262	-0.0242186	0.980678	0.997617
ITGA1	0.692509	-1.01931	3.85325	-0.264531	0.791371		0.7536	3.85592	0.19544	0.845049		0.335359	3.7183	0.0901916	0.928135
ITGA11	1.56302	-1.58344	2.00541	-0.789585	0.42977	0.852726	-2.14491	2.14619	-0.999407	0.317598	0.634608	-3.63865	2.15566	-1.68795	0.0914208	0.538421
ITGA4	15.7009	0.639931	0.437181	1.46377	0.143257	0.670559	1.37502	0.4156	3.30852	0.000937912	0.0194557	0.398898	0.395636	1.00824	0.313337	0.811434
ITGA5	0.0748224	0	9.22474	0	1		0	9.21431	0	1		0.00358997	9.01254	0.00039833	0.999682
ITGA6	0.328917	-0.888833	6.72454	-0.132178	0.894844		-1.41704	6.72034	-0.210858	0.832998		-0.957993	6.56978	-0.145818	0.884065
ITGAE	58.0479	-0.129161	0.589139	-0.219237	0.826465	0.968652	0.53739	0.589541	0.91154	0.362011	0.672102	-0.370678	0.580277	-0.638796	0.522956	0.882156
ITGAL	0.430485	0.939875	8.37182	0.112267	0.910612		-0.768834	8.38275	-0.0917162	0.926924		-0.958109	8.19757	-0.116877	0.906957
ITGAV	72.1186	-0.308483	0.28444	-1.08453	0.27813	0.805595	-0.0349389	0.28222	-0.1238	0.901474	0.964745	0.118841	0.279739	0.424829	0.670961	0.929135
ITGB1	19.3215	0.813195	0.794625	1.02337	0.306133	0.820497	0.510632	0.804705	0.634558	0.525717	0.788631	-1.53605	0.860779	-1.78449	0.0743443	0.497284
ITGB1BP1	5.00467	-0.409326	0.608763	-0.672389	0.501336	0.872575	0.167154	0.614362	0.272078	0.785562	0.919267	-1.76479	0.701187	-2.51686	0.0118408	0.192933
ITGB2	0.196635	-1.20941	9.22474	-0.131106	0.895692		-1.41695	9.21419	-0.153779	0.877784		-0.958145	9.01254	-0.106312	0.915334
ITGB3	0.165706	-0.888822	9.22474	-0.096352	0.923241		0	9.21431	0	1		-2.1355	9.00656	-0.237105	0.812575
ITGB5	0.855327	-1.94303	2.4021	-0.808889	0.418579		-1.4159	2.4138	-0.586586	0.557482	0.806803	-1.67767	2.3182	-0.723695	0.469253
ITK	0.303016	0.669871	9.19079	0.072885	0.941898		-1.41661	9.21419	-0.153742	0.877813		0	9.01264	0	1
ITPKC	53.5942	0.126804	0.245864	0.515749	0.60603	0.900084	0.726955	0.238961	3.04215	0.00234891	0.0382604	0.504396	0.238184	2.11767	0.0342027	0.341722
ITPR1	12.0373	0.225756	0.428562	0.526777	0.598348	0.899725	0.631176	0.412519	1.53005	0.126004	0.426515	1.02056	0.448409	2.27595	0.0228492	0.262239
ITPR2	43.3351	0.389191	0.382363	1.01786	0.308746	0.820497	-0.171771	0.379055	-0.453156	0.650436	0.854226	0.596171	0.368448	1.61806	0.105649	0.572503
JADE2	1.47348	-2.99694	2.03062	-1.47588	0.139977	0.666848	-1.45367	1.92115	-0.756667	0.44925	0.738277	-2.29532	2.00039	-1.14743	0.251202
JAG1	0.124022	1.2336	9.19693	0.134132	0.893298		0	9.21431	0	1		0	9.01264	0	1
JAK1	52.404	0.190533	0.269408	0.707229	0.479424	0.871661	-0.0141678	0.268617	-0.0527433	0.957936	0.983049	0.269266	0.264879	1.01656	0.309362	0.811434
JAK2	6.62687	0.787394	0.685152	1.14923	0.250463	0.785171	0.631036	0.675385	0.934335	0.350131	0.666465	0.345513	0.670551	0.515268	0.606366	0.915794
JAML	0.326677	-0.888822	9.22474	-0.096352	0.923241		-3.33838	9.19859	-0.362924	0.716662		-0.688499	9.01264	-0.0763926	0.939107
JKAMP	69.9685	-0.0340515	0.374384	-0.0909535	0.92753	0.987163	0.44006	0.37731	1.16631	0.24349	0.566969	0.0552611	0.37817	0.146128	0.88382	0.983757
JMJD6	296.48	0.330713	0.190756	1.73369	0.0829723	0.580754	0.203848	0.190775	1.06852	0.285285	0.601257	0.227802	0.188372	1.20932	0.226538	0.732091
JUN	9.26153	-1.63215	1.11659	-1.46173	0.143814	0.670559	-2.92668	1.25272	-2.33626	0.0194777	0.160041	-1.16734	1.13483	-1.02864	0.303648	0.808236
JUNB	4.04625	-0.835622	1.23683	-0.675615	0.499285	0.872575	-1.26108	1.26884	-0.993884	0.320279	0.636103	0.310195	1.1428	0.271434	0.786058	0.963898
KARS	13.8511	-0.085458	0.432262	-0.1977	0.84328	0.970751	0.422702	0.445979	0.947807	0.343228	0.658509	0.47436	0.443114	1.07051	0.284388	0.790633
KAT2B	33.7646	0.593713	0.421777	1.40764	0.159236	0.688914	-0.137275	0.42683	-0.321614	0.747745	0.902799	0.0337756	0.421915	0.0800531	0.936195	0.988073
KAT6A	227.827	0.455873	0.355475	1.28243	0.19969	0.727542	0.229195	0.355215	0.64523	0.518778	0.78614	0.695081	0.348709	1.9933	0.0462289	0.404142
KAT6B	389.355	0.29364	0.217166	1.35214	0.17633	0.708091	-0.133101	0.21616	-0.615751	0.538059	0.795776	0.552896	0.210749	2.62348	0.00870355	0.155828
KCNA1	0.208677	-0.647238	9.2235	-0.0701728	0.944056		0	9.21431	0	1		-0.688499	9.01264	-0.0763926	0.939107
KCNF1	4.92907	-0.681941	0.745957	-0.914182	0.360621	0.836613	1.06014	0.700229	1.51399	0.130029	0.432302	0.573954	0.705845	0.813144	0.416135	0.8617
KCNG1	0.916294	-1.26087	2.98184	-0.42285	0.672405		-2.50396	3.11514	-0.803802	0.421512	0.715891	-1.56053	3.03973	-0.513378	0.607687
KCNG3	0.156578	-0.888822	9.22474	-0.096352	0.923241		-1.08992	9.21431	-0.118285	0.905842		-0.95814	9.01254	-0.106312	0.915335
KCNJ15	0.0388324	0	9.22474	0	1		-1.09024	9.21431	-0.11832	0.905814		0	9.01264	0	1
KCNJ18	1.04085	0.952973	1.82785	0.521362	0.602115		-1.88013	2.09203	-0.89871	0.368807	0.675544	0.562312	1.81452	0.309896	0.75664
KCNJ6	0.613152	0.748117	3.10752	0.240744	0.809754		-0.865397	3.24398	-0.26677	0.789646		-1.17313	3.12449	-0.375464	0.707316
KCNJ8	9.83872	0.163927	0.590437	0.277636	0.781291	0.951119	1.15555	0.557069	2.07433	0.0380484	0.237432	-0.493921	0.592893	-0.833069	0.404806	0.8617
KCNK1	4.80934	-0.570999	0.7345	-0.777399	0.436923	0.853589	-1.15631	0.802357	-1.44114	0.149544	0.46176	0.622445	0.786625	0.791285	0.428778	0.8617
KCNK17	0.223979	-2.97178	9.21345	-0.322548	0.747037		0	9.21431	0	1		1.23771	8.99089	0.137663	0.890507
KCNK4	3.11274	0.522984	0.973212	0.53738	0.591005	0.898908	-0.180232	1.04424	-0.172597	0.862968	0.95726	0.663855	1.02466	0.64788	0.517063	0.878993
KCNK9	1.91279	0.312744	1.73335	0.180428	0.856817	0.972549	-2.08173	1.79371	-1.16058	0.245815	0.567103	-1.69836	1.76066	-0.964615	0.334738	0.826375
KCNQ2	59.2613	0.0215448	0.300188	0.071771	0.942784	0.992143	0.0121866	0.3012	0.0404604	0.967726	0.98623	0.0186743	0.30963	0.0603118	0.951907	0.992334
KCNQ3	3.77517	-0.71044	0.886236	-0.801637	0.422763	0.852379	-0.855062	0.914671	-0.93483	0.349876	0.666465	0.0819589	0.845608	0.096923	0.922788	0.986595
KCTD5	17.3608	0.0617538	0.461425	0.133833	0.893535	0.979283	0.590223	0.477154	1.23696	0.2161	0.537592	0.40628	0.484533	0.838499	0.401751	0.860084
KCTD9	9.84067	0.379797	0.561189	0.676772	0.498551	0.872575	-0.228111	0.590272	-0.38645	0.699164	0.87949	1.12796	0.587192	1.92094	0.054739	0.441083
KDELR2	527.189	0.261877	0.221712	1.18116	0.237541	0.774735	-0.00192635	0.222388	-0.00866215	0.993089	0.996021	0.132069	0.21796	0.605934	0.544559	0.890879
KDM3A	524.258	-0.737061	0.432089	-1.70581	0.0880436	0.594193	-0.891458	0.432252	-2.06236	0.0391738	0.237946	-0.503307	0.42166	-1.19363	0.232622	0.741879
KDM5A	408.486	0.349559	0.225736	1.54853	0.121495	0.63685	-0.00197034	0.224994	-0.00875726	0.993013	0.996021	0.0686608	0.219444	0.312886	0.754367	0.955361
KDM5B	73.5671	-0.938618	0.459632	-2.04211	0.0411411	0.449784	-0.686829	0.455878	-1.50661	0.131911	0.437264	0.0425043	0.438133	0.0970123	0.922717	0.986595
KDM5D	0.328084	-3.21352	8.86459	-0.362512	0.716969		-1.397	8.86915	-0.157512	0.874841		1.58496	8.63164	0.183622	0.85431
KDR	0.186133	-2.24276	9.21966	-0.243258	0.807805		0.511762	9.21431	0.0555399	0.955708		-0.688455	9.01264	-0.0763877	0.939111
KEAP1	93.7961	-0.0999172	0.268224	-0.372514	0.70951	0.934059	0.376844	0.265342	1.42022	0.155543	0.470043	0.347534	0.262669	1.32309	0.185807	0.680881
KGFLP1	24.9944	-1.00318	0.705215	-1.42252	0.154875	0.677503	-0.863984	0.71716	-1.20473	0.228308	0.547532	-0.519814	0.702696	-0.739743	0.459456	0.866778
KGFLP2	14.0807	0.903997	0.464827	1.9448	0.0517986	0.500307	0.275239	0.47146	0.583801	0.559354	0.808067	-0.131478	0.47489	-0.276859	0.781888	0.96299
KHDRBS3	133.56	0.309147	0.262056	1.1797	0.238119	0.774735	0.494012	0.260895	1.89352	0.0582881	0.285212	0.442815	0.259334	1.70751	0.0877275	0.53177
KIAA0100	138.311	0.347277	0.285364	1.21696	0.223619	0.769644	0.303551	0.284369	1.06745	0.285768	0.601257	0.196422	0.282288	0.69582	0.486542	0.869504
KIAA0101	3.94708	-0.301345	0.856567	-0.351806	0.724984	0.939295	-1.66655	1.14834	-1.45127	0.146706	0.456576	-2.70601	1.41855	-1.90758	0.0564452	0.449552
KIAA0196	288.939	0.366852	0.278936	1.31518	0.188448	0.721118	0.0489848	0.279929	0.17499	0.861087	0.95726	0.402776	0.274706	1.46621	0.142592	0.624503
KIAA0355	192.438	0.399029	0.186277	2.14212	0.0321836	0.404669	0.208128	0.184084	1.13062	0.258217	0.574746	0.597285	0.181889	3.28378	0.00102425	0.0369721
KIAA0753	334.2	0.117877	0.208318	0.565852	0.571495	0.895958	-0.131937	0.20756	-0.635658	0.524999	0.788631	0.193409	0.202006	0.957442	0.338344	0.826375
KIAA0907	360.154	0.321671	0.183569	1.75231	0.0797198	0.577228	-0.0082046	0.183074	-0.0448157	0.964254	0.986115	0.318462	0.178667	1.78243	0.0746785	0.497284
KIAA1033	79.0452	0.619389	0.413477	1.498	0.134133	0.663441	0.182417	0.417723	0.436693	0.662334	0.859217	-0.0229627	0.414433	-0.0554076	0.955814	0.992334
KIF11	355.974	-0.0258525	0.187801	-0.137659	0.89051	0.979283	0.631476	0.184422	3.42407	0.000616897	0.014536	1.16749	0.17903	6.52121	6.97436e-11	2.2298e-08
KIF13A	188.426	0.07722	0.165449	0.466729	0.640694	0.913174	0.304183	0.161289	1.88595	0.0593012	0.287274	0.44138	0.160241	2.75448	0.00587849	0.13289
KIF14	197.699	0.141191	0.268	0.526833	0.598309	0.899725	1.18946	0.259931	4.57608	4.73764e-06	0.000255517	1.89796	0.251598	7.54364	4.57029e-14	1.70472e-11
KIF15	68.8552	0.495405	0.310072	1.59771	0.110108	0.616446	1.09294	0.305914	3.57271	0.000353312	0.00951675	1.09083	0.303683	3.59199	0.000328162	0.015718
KIF18A	4.07958	0.634107	0.996358	0.636424	0.5245	0.881574	1.61569	0.93691	1.72448	0.0846205	0.354705	1.4375	0.989388	1.45292	0.146246	0.629738
KIF18B	4.59618	1.3952	0.833533	1.67384	0.0941617	0.598525	0.245142	0.909778	0.269453	0.787581	0.920009	0.582514	1.01811	0.572151	0.56722	0.895898
KIF1BP	75.7922	0.0470055	0.381868	0.123094	0.902033	0.980434	0.305665	0.383455	0.797134	0.425373	0.718849	0.152631	0.379853	0.401815	0.68782	0.936195
KIF20A	94.9636	-0.515033	0.302406	-1.70312	0.0885457	0.594193	1.31985	0.275958	4.78279	1.72878e-06	0.000102335	1.72652	0.269538	6.40549	1.49883e-10	3.04943e-08
KIF23	48.1322	-0.0883277	0.291361	-0.303156	0.761771	0.948823	1.20083	0.270101	4.44586	8.75404e-06	0.000433593	0.952849	0.272062	3.50232	0.000461229	0.0191154
KIF2C	367.584	0.0290009	0.263994	0.109854	0.912525	0.982809	0.89556	0.25998	3.44473	0.00057163	0.0138735	1.55606	0.253467	6.13909	8.29973e-10	1.38615e-07
KIF4A	3.38928	-0.538792	1.27662	-0.422046	0.672991	0.922077	1.42735	1.09443	1.30419	0.192168	0.51649	0.361764	1.122	0.322428	0.747129	0.954587
KIF5C	2779.74	0.229491	0.173145	1.32543	0.185029	0.716467	-0.203044	0.17312	-1.17285	0.240855	0.565283	0.212241	0.169184	1.2545	0.209661	0.716369
KIF9	0.24779	-1.20941	9.22474	-0.131106	0.895692		-1.08963	9.21431	-0.118254	0.905867		-2.03713	9.00762	-0.226156	0.82108
KIT	12.9428	-0.952351	0.472853	-2.01405	0.0440041	0.468885	-1.47314	0.531715	-2.77054	0.00559641	0.0703756	0.106193	0.43083	0.246484	0.805307	0.971842
KITLG	1.50943	0.399139	1.50735	0.264795	0.791167	0.955201	-0.937813	1.43412	-0.653929	0.513157	0.784772	1.11657	1.29166	0.864445	0.387343	0.852262
KLF5	3.65354	1.11155	0.922621	1.20477	0.228293	0.773422	-2.22167	1.11111	-1.99951	0.0455534	0.252264	1.22217	0.883106	1.38395	0.166375	0.660049
KLF6	48.3879	-0.0937966	0.295894	-0.316994	0.751248	0.948229	-0.803253	0.296219	-2.71169	0.0066941	0.0800325	0.00192987	0.28867	0.00668539	0.994666	0.998038
KLHDC2	719.856	-0.169928	0.257518	-0.659869	0.509338	0.87306	0.251917	0.257408	0.978669	0.327744	0.643836	-0.0827852	0.252737	-0.327554	0.743249	0.953232
KLHL21	30.8663	-0.237374	0.38404	-0.618095	0.536513	0.885563	-0.481084	0.390924	-1.23063	0.21846	0.539922	0.0142958	0.374344	0.0381889	0.969537	0.993077
KLHL24	164.093	0.0426751	0.212828	0.200515	0.841078	0.970751	0.16716	0.212389	0.787046	0.431255	0.722614	0.0749536	0.214928	0.348738	0.727286	0.946919
KLHL9	76.9836	-0.578037	0.355166	-1.62751	0.103629	0.605252	-0.184807	0.350333	-0.527518	0.597834	0.826748	-0.188626	0.333584	-0.565452	0.571766	0.897344
KLK11	0.0993023	0	9.22474	0	1		0	9.21431	0	1		-0.958145	9.01254	-0.106312	0.915334
KLK2	1.92991	-1.56644	1.49446	-1.04816	0.294565	0.814826	-1.96231	1.4487	-1.35453	0.175568	0.493175	-1.23687	1.24156	-0.996225	0.319141	0.811434
KLRC1	0.179781	0	9.22474	0	1		-0.768838	9.21431	-0.0834396	0.933502		0	9.01264	0	1
KLRC2	2.38452	-2.14651	1.9913	-1.07795	0.281058	0.806699	-1.9906	2.00126	-0.994671	0.319896	0.636103	-1.93533	1.78418	-1.08472	0.278046	0.782727
KLRK1	1.20164	0.0345561	2.11208	0.0163612	0.986946		-3.65323	2.16283	-1.6891	0.0912008	0.367682	-0.0514216	1.88474	-0.0272831	0.978234
KNL1	23.6068	-0.052779	0.507218	-0.104056	0.917125	0.984818	1.36545	0.485032	2.81518	0.00487506	0.062935	1.39164	0.477917	2.91188	0.00359259	0.0934908
KNSTRN	200.431	0.013563	0.159192	0.0851994	0.932103	0.989056	0.451705	0.157821	2.86214	0.00420788	0.056659	0.431069	0.156971	2.74618	0.00602945	0.133603
KRT14	0.777554	-1.79868	3.37803	-0.532466	0.594404		-1.09066	3.40283	-0.320516	0.748578	0.902799	-2.79909	3.2935	-0.849883	0.39539
KRT15	1.34574	-1.47896	1.68431	-0.878077	0.379902	0.838369	-0.672415	1.42034	-0.473418	0.635915	0.846214	-1.6603	1.75977	-0.943476	0.345438
KRT17	5.15133	-0.731727	0.640106	-1.14313	0.252983	0.786208	-0.24738	0.776398	-0.318625	0.750011	0.902915	-0.595401	0.699854	-0.850751	0.394908	0.856614
KRT18	11.0744	-0.61929	0.876889	-0.706236	0.480042	0.871661	-0.424514	0.887171	-0.478503	0.632292	0.845495	0.440654	0.85495	0.515415	0.606263	0.915794
KRT19	8.81602	-0.694731	0.546453	-1.27135	0.203605	0.731087	-1.24555	0.596702	-2.08738	0.0368535	0.23668	-0.753422	0.570514	-1.3206	0.186634	0.680881
KRT23	0.126385	0	9.22474	0	1		-1.09002	9.21431	-0.118296	0.905833		-1.71248	9.01015	-0.190061	0.849261
KRT4	0.329235	0.393584	7.64122	0.051508	0.958921		1.10964	7.59876	0.146029	0.883898		0.445088	7.45057	0.0597387	0.952364
KRT5	0.755274	0.439343	2.76664	0.1588	0.873826		-0.832528	2.87234	-0.289844	0.771936		0.790224	2.56753	0.307776	0.758253
KRT6A	5.69778	0.177366	0.877939	0.202026	0.839896	0.970182	-0.834714	0.873897	-0.955163	0.339495	0.654452	-1.26637	0.83393	-1.51855	0.128875	0.609774
KRT6C	0.635768	2.77682	2.74796	1.0105	0.312255		-0.433364	2.94876	-0.146965	0.88316		1.48009	2.75903	0.536455	0.591644
KRT7	0.291847	-1.23074	8.96313	-0.137311	0.890785		-0.821998	8.93002	-0.0920488	0.926659		-0.958058	8.76173	-0.109346	0.912928
KRT81	1.44981	-0.795831	1.71038	-0.465294	0.641721	0.913174	-3.1353	2.02946	-1.54489	0.122372	0.421523	-2.16689	1.88608	-1.14889	0.250602
KTN1	110.643	0.60656	0.369851	1.64001	0.101002	0.60503	0.334379	0.37203	0.898794	0.368762	0.675544	0.573767	0.364208	1.57539	0.115167	0.584934
KYAT3	824.374	0.00568788	0.118663	0.0479332	0.961769	0.998314	-0.0757806	0.119082	-0.636371	0.524535	0.788631	-0.0950714	0.117525	-0.808947	0.418546	0.8617
L1CAM	943.606	0.0744722	0.175433	0.424505	0.671197	0.921807	-0.339825	0.175328	-1.93823	0.0525955	0.269872	0.456586	0.171186	2.66719	0.00764887	0.148854
LAGE3	46.6204	-0.332818	0.259194	-1.28405	0.199126	0.727542	0.79861	0.244399	3.26765	0.00108445	0.0213981	0.162263	0.24407	0.664824	0.506163	0.87726
LAMA2	0.712008	0.393557	3.11538	0.126327	0.899473		-0.769415	2.98075	-0.258128	0.796308		-1.51642	3.03992	-0.498834	0.617896
LAMA3	0.258469	0	9.22474	0	1		3.17365	9.15262	0.346748	0.728781		1.53171	8.98968	0.170385	0.864707
LAMB3	0.266077	0.619417	7.8298	0.0791102	0.936945		-0.769158	7.84346	-0.0980636	0.921882		0.871678	7.6482	0.113972	0.90926
LAMC2	9.75703	-1.06216	0.620021	-1.7131	0.086694	0.592078	-0.767187	0.55331	-1.38654	0.165582	0.480128	-0.319282	0.539457	-0.591857	0.553946	0.894275
LAMP1	2134.81	-0.311649	0.287278	-1.08483	0.277996	0.805595	-0.545441	0.287237	-1.89892	0.057575	0.284013	0.0251991	0.280565	0.0898155	0.928434	0.986595
LAMP3	0.413582	-1.20941	9.22474	-0.131106	0.895692		-1.08946	9.21431	-0.118235	0.905881		0	9.01264	0	1
LAP3	793.67	-0.472376	0.278832	-1.69412	0.0902421	0.594355	-0.329743	0.278438	-1.18426	0.23631	0.560631	-0.0128406	0.271835	-0.0472367	0.962325	0.992709
LAPTM5	0.498585	-0.488993	4.87029	-0.100403	0.920024		2.96248	4.75596	0.622898	0.533352		-0.693955	4.75561	-0.145924	0.883982
LAT	39.7801	0.310167	0.615543	0.503892	0.614337	0.906147	0.17828	0.613727	0.290488	0.771443	0.913643	0.367193	0.602801	0.609145	0.542429	0.889641
LBR	84.5266	0.216994	0.325629	0.666384	0.505165	0.872575	0.41597	0.326197	1.27521	0.202234	0.526129	0.115403	0.329812	0.349906	0.726409	0.946919
LCAL1	0.562075	-3.16517	4.24671	-0.745324	0.456076		-2.42867	4.25779	-0.570407	0.568402		-1.6928	4.15378	-0.407532	0.683617
LCE1E	0.665003	-2.0846	4.00887	-0.519997	0.603066		-2.39144	4.00129	-0.597666	0.550063		-0.896127	3.87347	-0.23135	0.817043
LCK	0.396763	-1.20942	8.69205	-0.139141	0.889339		-0.768786	8.68332	-0.088536	0.929451		-2.78012	8.48004	-0.327842	0.743031
LCN2	0.0819191	0	9.22474	0	1		-1.41725	9.21419	-0.153811	0.877759		0	9.01264	0	1
LCP1	2.16866	-2.90707	1.48122	-1.96262	0.0496909	0.500307	0.826057	0.969381	0.852149	0.394132	0.694613	0.146906	0.977862	0.150232	0.880581	0.983757
LDHA	590.294	0.0569907	0.374872	0.152027	0.879166	0.978894	0.639047	0.375007	1.70409	0.0883634	0.363488	0.0950081	0.367854	0.258277	0.796193	0.969068
LDLR	83.5648	-0.496628	0.364356	-1.36303	0.172872	0.703944	-0.618193	0.360592	-1.71439	0.0864578	0.35992	0.494071	0.351765	1.40455	0.160155	0.654968
LEAP2	1.47955	0.275009	1.77456	0.154973	0.876842	0.978474	0.440687	2.06105	0.213817	0.83069	0.944375	2.88289	1.78919	1.61128	0.107118
LEF1	66.8251	0.261798	0.225123	1.16291	0.244866	0.781465	1.26648	0.216882	5.83951	5.23533e-09	5.08246e-07	0.712243	0.220322	3.23274	0.0012261	0.0428752
LEFTY1	0.0878041	-0.888822	9.22474	-0.096352	0.923241		0	9.21431	0	1		-0.688499	9.01264	-0.0763926	0.939107
LEFTY2	0.275883	1.5542	9.19693	0.168991	0.865804		0	9.21431	0	1		-0.688499	9.01264	-0.0763926	0.939107
LEPROTL1	97.8554	0.143052	0.533729	0.268023	0.788681	0.955019	0.581676	0.536282	1.08465	0.278079	0.592534	-0.191715	0.53305	-0.359656	0.719105	0.946919
LGALS1	0.0919293	0	9.22474	0	1		0	9.21431	0	1		0	9.01264	0	1
LGALS8	0.496165	-1.20941	4.61627	-0.261989	0.79333		0.786503	4.53922	0.173268	0.862441		-1.84294	4.48684	-0.410744	0.68126
LGMN	55.0043	-1.00634	0.301566	-3.33706	0.000846688	0.0487057	-0.520623	0.294021	-1.7707	0.0766103	0.336834	0.182378	0.276558	0.659458	0.509602	0.878751
LHB	0.862857	0	3.02733	0	1		-1.80377	3.02269	-0.596744	0.550679	0.80338	-3.18229	2.91539	-1.09155	0.27503
LHCGR	1.16197	-4.49129	2.09988	-2.13884	0.0324489		-1.34415	2.16113	-0.621967	0.533964	0.794255	-2.03092	2.08222	-0.97536	0.329382
LHX2	2.56089	-0.324404	1.07185	-0.302657	0.762151	0.948823	-0.405859	1.05326	-0.385334	0.69999	0.879635	-1.29239	1.09028	-1.18537	0.235871	0.746647
LHX8	0.287766	-2.34337	9.21906	-0.254187	0.799351		0	9.21431	0	1		0.273236	9.01264	0.030317	0.975814
LIG1	18.3407	-1.22131	0.466717	-2.61681	0.00887565	0.219601	0.783761	0.420574	1.86355	0.0623852	0.298547	0.0947287	0.416191	0.227609	0.819951	0.973301
LILRA6	6.93356	0.0184007	0.978987	0.0187957	0.985004	0.998521	-2.72427	1.10029	-2.47596	0.0132877	0.127468	-1.43281	0.995388	-1.43945	0.150023	0.63469
LILRB2	0.426561	-0.247645	4.57503	-0.0541296	0.956832		-1.75392	4.55224	-0.385287	0.700025		-1.07656	4.4596	-0.241404	0.809242
LIMS4	4.50422	-2.16346	1.08757	-1.98926	0.0466723	0.483752	0.888409	0.844827	1.05159	0.292989	0.608882	-2.10956	1.12235	-1.8796	0.0601632	0.47244
LINC00304	1.51369	1.02193	1.53927	0.663904	0.506752	0.872782	-1.4751	1.69966	-0.86788	0.38546	0.687371	0.291154	1.56414	0.186144	0.852332	0.982802
LINC00520	0.498888	-1.60299	4.60447	-0.348138	0.727736		-1.81193	4.60281	-0.393657	0.693834		0.374144	4.41892	0.0846686	0.932525
LINC00621	0.115416	0.0729132	9.22474	0.00790409	0.993694		-1.41709	9.21419	-0.153794	0.877772		0	9.01264	0	1
LINC00623	0.0906498	0	9.22474	0	1		-0.769374	9.21431	-0.0834977	0.933456		-0.426196	9.01264	-0.0472886	0.962283
LIPA	340.748	-0.499378	0.310433	-1.60865	0.107694	0.609354	-0.698694	0.3109	-2.24733	0.0246191	0.185561	-0.491159	0.30304	-1.62077	0.105066	0.572096
LIX1	0.0805684	0	9.22474	0	1		-0.769517	9.21431	-0.0835132	0.933443		-0.688499	9.01264	-0.0763926	0.939107
LMNA	746.063	-0.400829	0.464143	-0.863591	0.387813	0.838369	-1.20224	0.464484	-2.58833	0.00964432	0.102661	-0.128577	0.453281	-0.283658	0.776673	0.960328
LMNB1	242.178	-0.0060609	0.217112	-0.027916	0.977729	0.998359	0.44758	0.21678	2.06467	0.0389543	0.237946	0.470819	0.214645	2.19348	0.0282731	0.300511
LMO1	0.0488546	1.2603	9.20766	0.136875	0.89113		-0.769534	9.21431	-0.0835152	0.933442		-0.426196	9.01264	-0.0472886	0.962283
LMO3	0.546303	0	4.16381	0	1		-1.74786	4.13932	-0.422258	0.672836		-3.13432	4.03797	-0.776212	0.437624
LMOD1	98.7803	0.325986	0.235554	1.38391	0.166386	0.695368	-0.879244	0.24241	-3.62709	0.000286635	0.00808912	0.168335	0.233594	0.720629	0.471138	0.866778
LOC100505501	0.0897179	0	9.22474	0	1		0	9.21431	0	1		0	9.01264	0	1
LOC100505564	0.284762	-1.63429	9.22342	-0.177189	0.85936		0	9.21431	0	1		-0.567204	9.01132	-0.0629435	0.949811
LOC100505614	0.0487154	0	9.22474	0	1		0.190699	9.21431	0.020696	0.983488		0.797888	9.01264	0.0885299	0.929456
LOC100505812	1.06101	-3.09741	2.2137	-1.3992	0.161754		-0.0608145	2.14404	-0.0283645	0.977371	0.990017	1.50526	1.96604	0.765629	0.443897
LOC100506029	110.357	0.513055	0.378951	1.35388	0.175775	0.707093	0.857989	0.380086	2.25735	0.023986	0.181919	0.342923	0.372936	0.919522	0.357822	0.837664
LOC100506051	2.6895	-1.6438	1.26802	-1.29635	0.194856	0.724844	-1.38953	1.09127	-1.27331	0.202907	0.526129	-0.843666	1.13104	-0.745919	0.455716	0.866778
LOC100506621	1.40142	-1.48134	1.68115	-0.881148	0.378238	0.838369	1.18061	1.26593	0.932603	0.351025	0.666465	0.236087	1.16416	0.202795	0.839295
LOC100506948	26.7521	-0.334257	0.554115	-0.603227	0.546358	0.886579	-0.230306	0.561201	-0.410381	0.681527	0.870066	-0.553828	0.545004	-1.01619	0.309539	0.811434
LOC100510495	0.284338	-1.60896	9.2235	-0.174442	0.861518		-1.87235	9.21258	-0.203238	0.838949		-0.958145	9.01254	-0.106313	0.915334
LOC220729	703.768	0.128217	0.105494	1.21539	0.224218	0.769644	-0.213419	0.105825	-2.01671	0.043726	0.246947	0.141932	0.103668	1.3691	0.170968	0.662698
LOC283357	3.05513	0.0699053	0.99756	0.0700763	0.944133	0.992143	-1.60244	1.11508	-1.43706	0.1507	0.461803	-0.205641	0.927283	-0.221768	0.824495	0.973301
LOC284561	0.337053	-2.24579	9.21964	-0.243588	0.80755		3.0626	9.1508	0.334681	0.737865		1.26552	8.97196	0.141053	0.887828
LOC285812	1.88415	-0.749019	1.4401	-0.520115	0.602983	0.899782	-4.04619	1.7363	-2.33036	0.0197873	0.161128	0.148481	1.31781	0.112673	0.91029	0.985568
LOC286191	0.174198	-0.888822	9.22474	-0.096352	0.923241		-1.0897	9.21431	-0.118261	0.905861		0.00358999	9.01254	0.000398333	0.999682
LOC652493	0.525679	0.0729626	4.23218	0.01724	0.986245		0.421257	4.16975	0.101027	0.919529		-2.84357	4.10891	-0.692051	0.488906
LOXL1	2026.26	0.0726718	0.179017	0.405949	0.68478	0.924694	-0.51943	0.179237	-2.898	0.0037555	0.0517876	0.0773037	0.175258	0.441086	0.659151	0.928954
LPAR2	39.3559	0.286308	0.289691	0.988323	0.322994	0.825573	-0.350431	0.291781	-1.20101	0.229748	0.550097	0.0492399	0.298902	0.164736	0.869152	0.983757
LPCAT1	6.64476	-0.969373	0.770284	-1.25846	0.208225	0.740534	-1.23271	0.733606	-1.68034	0.0928903	0.37051	-0.632109	0.773433	-0.817276	0.413771	0.8617
LPGAT1	5.4613	1.01538	0.756665	1.34191	0.179624	0.709993	-0.118065	0.771242	-0.153084	0.878332	0.96153	1.29744	0.763369	1.69963	0.089201	0.536645
LPIN3	1.77925	0.249152	1.36237	0.182882	0.854891	0.972549	-0.45662	1.3238	-0.34493	0.730147	0.896341	0.938837	1.18039	0.795364	0.426402	0.8617
LRCH4	20.3258	0.0236532	0.393289	0.060142	0.952043	0.995298	-0.494081	0.389688	-1.26789	0.204837	0.52831	0.353441	0.390872	0.904236	0.36587	0.841567
LRP1	202.417	0.143529	0.537343	0.267109	0.789386	0.955019	0.204218	0.5356	0.381289	0.702989	0.881733	0.222606	0.523504	0.425223	0.670674	0.929135
LRP10	311.663	-0.173014	0.168061	-1.02947	0.303259	0.820497	-0.10711	0.165977	-0.645328	0.518715	0.78614	0.366765	0.162487	2.2572	0.0239957	0.272601
LRPAP1	11.4084	0.229706	0.59815	0.384027	0.700958	0.932457	-0.28943	0.597146	-0.484689	0.627897	0.843757	0.667252	0.600596	1.11098	0.266575	0.77639
LRRC34	1.32723	-2.80533	1.82395	-1.53805	0.124036	0.637173	1.54661	1.53693	1.0063	0.314272	0.630884	-3.47938	1.79106	-1.94264	0.0520596
LRRC3B	0.233687	-2.11544	9.22048	-0.229429	0.818536		-1.08956	9.21431	-0.118247	0.905872		0.273236	9.01264	0.030317	0.975814
LRRC41	1246.3	-0.259717	0.254436	-1.02076	0.30737	0.820497	-0.280471	0.25391	-1.10461	0.26933	0.582941	0.212941	0.247937	0.858852	0.390422	0.853224
LRRFIP2	12.9336	-0.16101	0.501318	-0.321173	0.74808	0.946306	-0.450116	0.514944	-0.874106	0.38206	0.686351	0.0592143	0.495938	0.119399	0.90496	0.985568
LSM1	145.897	0.074885	0.473073	0.158295	0.874225	0.977761	0.49333	0.474231	1.04027	0.298213	0.616211	-0.710741	0.469074	-1.5152	0.129722	0.611194
LSM2	337.878	0.509376	0.315064	1.61674	0.105935	0.609057	0.526542	0.315573	1.66853	0.0952113	0.375012	0.0447149	0.311141	0.143713	0.885727	0.983757
LSM5	456.111	0.259445	0.338132	0.767291	0.442909	0.856969	0.572748	0.338199	1.69353	0.0903554	0.36671	-0.0491084	0.330962	-0.148381	0.882042	0.983757
LSM6	612.038	0.343797	0.393948	0.872696	0.382829	0.838369	0.490951	0.394291	1.24515	0.213077	0.534948	-0.237022	0.385731	-0.614474	0.538902	0.889359
LSR	0.0671324	0	9.22474	0	1		0	9.21431	0	1		-1.24614	9.01221	-0.138272	0.890025
LSS	104.367	-0.362186	0.381284	-0.949911	0.342157	0.829551	-0.795696	0.38021	-2.09278	0.0363685	0.236006	-0.0408872	0.373826	-0.109375	0.912905	0.985568
LST1	0.372633	2.56942	7.48685	0.343191	0.731455		0	7.55485	0	1		0.998944	7.35864	0.135751	0.892018
LTB	0.0593522	0	9.22474	0	1		0	9.21431	0	1		0	9.01264	0	1
LTF	0.215184	0	9.22474	0	1		0.511754	9.21431	0.0555391	0.955709		-0.958097	9.01254	-0.106307	0.915339
LUM	4.16322	-0.25459	0.88709	-0.286995	0.774116	0.951119	-0.348821	0.929608	-0.375234	0.707486	0.884489	0.372507	0.914572	0.407302	0.683786	0.934587
LUZP6	38.6318	-0.670278	0.303495	-2.20853	0.0272074	0.371859	-0.783141	0.304445	-2.57236	0.0101009	0.104764	-0.0136072	0.2861	-0.047561	0.962066	0.992709
LY96	0.196583	-0.247679	9.22474	-0.0268494	0.97858		0	9.21431	0	1		-1.48034	9.0116	-0.16427	0.869518
LYAR	206.138	0.15941	0.380641	0.418794	0.675367	0.922077	-0.0912769	0.380138	-0.240115	0.810241	0.934524	-0.0236069	0.369883	-0.0638228	0.949111	0.992334
LYN	0.945129	0.0729629	2.8036	0.0260247	0.979238		0.176368	2.54096	0.0694098	0.944663	0.979166	-0.234639	2.54363	-0.0922458	0.926503
LYNX1	0.808458	0.848268	3.24851	0.261125	0.793996		0.0960827	3.33174	0.0288386	0.976993	0.990017	0.273306	3.34848	0.0816211	0.934948
LYPD2	0.235381	-1.60822	7.91213	-0.20326	0.838932		0.184443	7.88555	0.02339	0.981339		0.797926	7.73162	0.103203	0.917802
LYPLA1	2768.91	0.150337	0.250892	0.599211	0.549032	0.887876	0.220856	0.250923	0.880174	0.378765	0.684484	0.16671	0.245365	0.679435	0.496862	0.875092
LYRM1	98.9274	-0.108823	0.284964	-0.381884	0.702548	0.932457	-0.0574093	0.28541	-0.201147	0.840583	0.945364	0.203681	0.282185	0.721798	0.470418	0.866778
LYSMD3	0.509789	-3.29311	4.44883	-0.74022	0.459167		-1.09053	4.47673	-0.2436	0.80754		-1.12036	4.37435	-0.25612	0.797858
LYZ	0.691157	2.16036	2.63567	0.819663	0.412408		-2.7687	2.82584	-0.97978	0.327195		-0.423641	2.79459	-0.151593	0.879508
MACF1	95.4506	-0.0959081	0.275772	-0.34778	0.728005	0.939507	-0.147534	0.2716	-0.543204	0.58699	0.819692	0.416323	0.26619	1.56401	0.117815	0.587882
MAD2L1	33.4567	0.144747	0.577679	0.250566	0.802149	0.959758	0.646944	0.582248	1.11112	0.266519	0.581678	0.361748	0.580456	0.623214	0.533144	0.888362
MAFF	50.132	-0.0293639	0.426764	-0.068806	0.945144	0.992143	-0.123084	0.420634	-0.292615	0.769816	0.912421	0.0552719	0.416078	0.13284	0.89432	0.983757
MAFG	176.651	-0.021218	0.712681	-0.0297721	0.976249	0.998359	-1.40968	0.714827	-1.97206	0.0486027	0.257552	-0.694292	0.698089	-0.994561	0.31995	0.811434
MAGEA12	0.275326	0	9.22474	0	1		-0.768686	9.21431	-0.0834231	0.933515		2.56018	8.9576	0.28581	0.775023
MAGEA2	0.208796	0	9.22474	0	1		0	9.21431	0	1		0.0625849	8.99881	0.00695479	0.994451
MAGEA3	0.388192	0	9.22474	0	1		-0.128963	9.21431	-0.0139959	0.988833		-2.37152	9.00431	-0.263376	0.792261
MAGEA6	1.09047	-2.55912	2.24655	-1.13913	0.254648		-0.770272	2.27806	-0.338126	0.735268	0.898537	-2.71834	2.16047	-1.25822	0.208313
MAGI1	187.078	0.184116	0.191386	0.96201	0.336044	0.827005	0.247694	0.187214	1.32305	0.18582	0.506343	0.663108	0.182618	3.63112	0.000282197	0.0140346
MAL2	0.190622	0	9.22474	0	1		-1.08954	9.21431	-0.118244	0.905874		-0.426196	9.01264	-0.0472886	0.962283
MALAT1	27045.9	-0.510439	0.468713	-1.08902	0.276144	0.805595	-0.612289	0.468712	-1.30632	0.191443	0.515113	-0.347627	0.457938	-0.759114	0.447785	0.863916
MALT1	46.0982	0.309609	0.301833	1.02576	0.305003	0.820497	0.17718	0.305333	0.580285	0.561722	0.808121	-0.0293528	0.304101	-0.0965232	0.923105	0.986595
MAMLD1	0.266892	0	9.02938	0	1		-0.768719	9.0196	-0.0852277	0.93208		0.273239	8.82178	0.0309732	0.975291
MAN2B1	37.331	-0.0693371	0.248244	-0.27931	0.780007	0.951119	0.260891	0.24416	1.06852	0.285284	0.601257	0.217708	0.258674	0.841629	0.399995	0.860084
MANF	96.7617	-0.376392	0.273668	-1.37536	0.16902	0.700825	-0.301878	0.272695	-1.10702	0.268287	0.582929	0.0281148	0.263907	0.106533	0.91516	0.986574
MAOA	1.21988	-2.0061	2.40846	-0.832939	0.404879	0.843471	-2.94894	2.37294	-1.24274	0.213964	0.535376	-4.0927	2.30062	-1.77896	0.0752464
MAOB	0.131057	0.393505	9.22474	0.0426576	0.965974		-0.769208	9.21431	-0.0834797	0.93347		-0.688499	9.01264	-0.0763926	0.939107
MAP1B	683.34	-0.359175	0.404552	-0.887834	0.37463	0.838369	-0.507317	0.40432	-1.25474	0.209572	0.532042	-0.107833	0.394988	-0.273004	0.78485	0.96299
MAP1LC3A	66.6451	-0.018085	0.229262	-0.0788838	0.937125	0.99187	-0.414914	0.23638	-1.75529	0.07921	0.342679	-0.365264	0.235081	-1.55378	0.120236	0.593045
MAP1LC3B	1510.47	0.0930324	0.203111	0.458038	0.646925	0.91675	-0.0235656	0.203254	-0.115942	0.907699	0.966646	0.0303103	0.198843	0.152433	0.878845	0.983757
MAP2	754.282	-0.0371797	0.195732	-0.189952	0.849347	0.971042	-0.640018	0.195737	-3.26978	0.00107631	0.0213981	0.0931117	0.190856	0.487865	0.625646	0.922572
MAP2K4	540.612	0.286116	0.159908	1.78925	0.073574	0.564391	0.163401	0.159583	1.02393	0.305871	0.625399	0.209798	0.156275	1.34249	0.179437	0.672203
MAP2K5	17.8238	0.162978	0.368559	0.442204	0.658341	0.920126	-0.667683	0.397124	-1.6813	0.0927054	0.37051	-0.274492	0.391198	-0.70167	0.482885	0.86913
MAP3K4	34.6018	0.585419	0.286039	2.04664	0.0406935	0.448017	-0.101153	0.288161	-0.35103	0.725566	0.893848	0.44632	0.28597	1.56072	0.118589	0.588476
MAP4K4	691.263	0.457389	0.205375	2.22709	0.0259413	0.365813	0.404972	0.20486	1.97682	0.0480616	0.256364	0.476364	0.200514	2.37571	0.0175153	0.234726
MAP6	204.504	0.0489396	0.211627	0.231254	0.817118	0.967123	-0.524643	0.213144	-2.46144	0.0138379	0.131704	-0.207697	0.209578	-0.991027	0.321673	0.811616
MAP7	6.41688	-0.376817	0.774601	-0.486466	0.626637	0.911547	-1.5012	0.775389	-1.93606	0.0528598	0.270655	0.095342	0.698617	0.136472	0.891448	0.983757
MAPK1	18.9764	0.163739	0.442578	0.369966	0.711408	0.934059	0.562264	0.450841	1.24715	0.212344	0.53477	-0.0956326	0.444465	-0.215163	0.82964	0.973926
MAPK12	77.3773	-0.362905	0.22368	-1.62243	0.104711	0.605376	-0.500871	0.223711	-2.23892	0.0251614	0.187332	-0.301066	0.226049	-1.33186	0.182906	0.675483
MAPK13	5.74028	1.09977	0.741996	1.48218	0.138293	0.663815	1.04494	0.743836	1.4048	0.16008	0.473221	1.12775	0.71289	1.58194	0.113663	0.584934
MAPK14	133.014	-0.425694	0.193138	-2.20409	0.0275177	0.371859	-0.149616	0.190294	-0.786236	0.431729	0.722614	0.050131	0.18545	0.27032	0.786914	0.963937
MAPK1IP1L	20.1564	-0.380572	0.423597	-0.89843	0.368957	0.838369	-0.767406	0.45118	-1.70089	0.088964	0.364722	0.231851	0.438358	0.528908	0.596869	0.913051
MAPK3	663.566	-0.147753	0.156591	-0.943556	0.345397	0.829551	-0.181793	0.156109	-1.16452	0.244212	0.567103	0.223225	0.152854	1.46038	0.144186	0.626578
MAPK9	291.766	0.322683	0.226398	1.42529	0.154074	0.677503	0.191052	0.226873	0.842108	0.399727	0.696984	0.0378448	0.222562	0.170041	0.864978	0.983757
MAPKAPK2	1613.91	0.766524	0.173163	4.42659	9.57326e-06	0.00177769	0.172867	0.173181	0.998182	0.318191	0.634671	0.0999812	0.169319	0.59049	0.554862	0.894275
MAPKAPK3	8.32214	0.158126	0.620412	0.254873	0.798821	0.958898	0.604156	0.614897	0.982531	0.325838	0.642178	0.901774	0.663496	1.35913	0.174107	0.662698
MAPKAPK5	48.7475	-0.0499558	0.336411	-0.148496	0.881951	0.979031	0.474549	0.336728	1.4093	0.158748	0.473221	0.462994	0.335873	1.37848	0.168055	0.660739
MAPT	34.4651	0.00354481	0.30823	0.0115005	0.990824	0.998521	-0.367568	0.309435	-1.18787	0.234887	0.557798	0.124329	0.300622	0.413573	0.679187	0.933607
MARCKS	545.079	-0.195909	0.241407	-0.811532	0.41706	0.847752	-0.0128288	0.240585	-0.0533236	0.957474	0.983049	0.101878	0.235059	0.433416	0.664713	0.929135
MASP2	0.990819	2.99054	1.89231	1.58036	0.114023		-1.11765	2.03095	-0.550312	0.582105	0.818137	0.535611	2.15376	0.248686	0.803604
MAST2	50.98	-0.391224	0.364396	-1.07362	0.282992	0.806714	-0.0522707	0.363863	-0.143655	0.885773	0.964449	-0.0268907	0.363454	-0.0739865	0.941021	0.989664
MAT2A	4988.68	-0.378338	0.169973	-2.22587	0.026023	0.365813	-0.150315	0.169829	-0.885096	0.376105	0.682427	0.122723	0.165923	0.739641	0.459518	0.866778
MBD4	88.0388	-0.581726	0.319346	-1.82162	0.0685129	0.54739	0.0774381	0.318852	0.242865	0.80811	0.933645	-0.0404431	0.312671	-0.129347	0.897083	0.983757
MBL2	0.0804835	-1.60897	9.2235	-0.174443	0.861518		0	9.21431	0	1		-0.426196	9.01264	-0.0472886	0.962283
MBNL1	287.203	0.203707	0.189391	1.07559	0.282111	0.806699	0.266052	0.188621	1.41051	0.158389	0.473221	0.330002	0.185271	1.78119	0.0748815	0.497284
MBNL2	295.728	0.166088	0.232096	0.715602	0.474237	0.871661	-0.381731	0.233187	-1.63701	0.101628	0.381352	0.263179	0.228807	1.15022	0.250053	0.768066
MBOAT7	5.01642	-0.179031	0.783142	-0.228606	0.819175	0.967123	-1.7499	0.883098	-1.98154	0.0475304	0.25465	-0.218435	0.82301	-0.26541	0.790694	0.967357
MBP	0.108044	-0.888822	9.22474	-0.096352	0.923241		-0.769368	9.21431	-0.0834971	0.933456		1.23771	8.99089	0.137663	0.890507
MBTPS1	54.7509	-0.218452	0.326571	-0.668924	0.503544	0.872575	-0.057957	0.317947	-0.182285	0.855359	0.953586	-0.140219	0.313895	-0.446707	0.655087	0.927999
MCEMP1	3.01685	-2.45749	1.31269	-1.8721	0.0611931	0.513478	-2.31298	1.21029	-1.91109	0.0559934	0.277339	-0.434393	0.929278	-0.467453	0.640176	0.923447
MCIDAS	0.321695	-2.42422	8.8677	-0.273376	0.784564		0.512243	8.86488	0.0577834	0.953921		-0.958092	8.67002	-0.110506	0.912008
MCL1	1011.18	-0.152133	0.189432	-0.803102	0.421916	0.852379	-0.0867536	0.189482	-0.457845	0.647064	0.852598	0.105196	0.185792	0.566203	0.571256	0.897172
MCM10	34.3457	0.122294	0.35052	0.348893	0.72717	0.939507	-0.340209	0.354138	-0.96067	0.336718	0.651282	0.556763	0.341638	1.62969	0.103168	0.5671
MCM2	5.73932	-0.769079	0.595933	-1.29055	0.196861	0.724844	-0.286751	0.565257	-0.507293	0.611949	0.835556	-0.214742	0.645202	-0.332829	0.739263	0.953216
MCM3	1116.07	-0.200732	0.183851	-1.09182	0.274911	0.804838	-0.236813	0.183463	-1.2908	0.196775	0.519204	0.261063	0.179163	1.45713	0.145082	0.628033
MCM4	40.1747	-0.190661	0.402674	-0.473486	0.635866	0.912991	-0.18887	0.408045	-0.462866	0.643461	0.849662	-0.361223	0.426204	-0.847535	0.396697	0.857786
MCM6	20.7697	-0.352646	0.51971	-0.678543	0.497427	0.872575	0.0176617	0.516382	0.0342029	0.972715	0.988237	-0.154691	0.51466	-0.30057	0.763742	0.95703
MCM7	599.311	0.162841	0.194057	0.839136	0.401393	0.841312	0.235558	0.194087	1.21367	0.224872	0.54305	0.387605	0.190596	2.03365	0.0419873	0.38371
MCOLN1	62.6179	-0.472207	0.271934	-1.73648	0.0824794	0.580754	-0.25041	0.269771	-0.928231	0.353288	0.6666	-0.0200188	0.263728	-0.0759072	0.939493	0.988796
MCUR1	99.3136	0.226356	0.325685	0.695016	0.487045	0.872575	0.000990554	0.32758	0.00302386	0.997587	0.99841	0.185288	0.326248	0.567935	0.570079	0.897172
MDH1	255.642	-0.255273	0.303979	-0.83977	0.401037	0.841312	0.259105	0.302062	0.857788	0.39101	0.691588	0.0509113	0.295494	0.172293	0.863208	0.983757
MDH2	1826.79	-0.22555	0.13461	-1.67558	0.0938205	0.598008	-0.113412	0.134373	-0.844014	0.398662	0.696984	0.23786	0.131525	1.80848	0.0705315	0.493688
MDK	935.497	-0.165594	0.248376	-0.666705	0.50496	0.872575	0.225129	0.248346	0.906513	0.364664	0.672859	0.0452152	0.242979	0.186087	0.852376	0.982802
MDM2	615.028	0.793927	0.263164	3.01686	0.00255412	0.101204	1.55536	0.262746	5.91961	3.22707e-09	3.40526e-07	0.550372	0.258746	2.12708	0.0334136	0.335335
ME1	150.515	0.154787	0.197273	0.784636	0.432667	0.853589	0.977783	0.188074	5.19894	2.00428e-07	1.56915e-05	0.677229	0.185321	3.65436	0.000257825	0.0131139
ME2	61.1719	-0.0977056	0.359716	-0.271619	0.785915	0.952788	0.235471	0.357446	0.658759	0.51005	0.782871	0.30085	0.357547	0.841428	0.400108	0.860084
MED1	1114.49	0.31094	0.158885	1.95702	0.0503455	0.500307	0.153943	0.158566	0.97085	0.331623	0.645006	0.434455	0.155139	2.80043	0.00510346	0.120339
MED12	705.546	0.395833	0.179239	2.20841	0.0272158	0.371859	0.0979788	0.178718	0.548232	0.583532	0.818137	0.500902	0.175095	2.86074	0.00422658	0.105381
MED21	85.1439	0.276465	0.447546	0.617736	0.536749	0.885563	0.345251	0.449901	0.767393	0.442848	0.732615	-0.255153	0.440929	-0.578672	0.56281	0.895176
MED24	147.966	-0.120276	0.174327	-0.689941	0.490231	0.872575	-0.185454	0.173609	-1.06823	0.285418	0.601257	0.363576	0.172889	2.10295	0.0354703	0.35125
MEF2C	27.7306	-0.113118	0.40909	-0.276512	0.782155	0.951119	0.430292	0.413734	1.04002	0.298331	0.616211	0.164252	0.41897	0.392038	0.69503	0.939303
MEFV	2.33916	-2.02668	1.43856	-1.40883	0.158887	0.688914	-1.63612	1.44698	-1.13071	0.258176	0.574746	0.471787	1.09721	0.429986	0.667205	0.929135
MELK	5.88184	0.237664	0.706721	0.336292	0.736651	0.943783	0.988736	0.754311	1.31078	0.189932	0.512753	0.91701	0.791513	1.15855	0.246638	0.766479
MEST	6.09841	-0.701967	0.789284	-0.889371	0.373804	0.838369	-0.582012	0.852638	-0.682601	0.494859	0.77137	-1.79141	0.961201	-1.86372	0.0623608	0.476233
MET	0.529279	0.399254	4.42928	0.0901397	0.928176		-0.769928	4.51761	-0.170428	0.864673		-1.90315	4.39036	-0.433483	0.664664
METRN	212.526	-0.751424	0.239703	-3.13481	0.00171963	0.0807523	-0.147541	0.237117	-0.62223	0.533791	0.794255	0.464175	0.232274	1.9984	0.0456738	0.400855
METTL2A	5.52059	-0.684616	0.631903	-1.08342	0.278623	0.805595	-0.73102	0.729788	-1.00169	0.316494	0.633771	-0.349778	0.683954	-0.511406	0.609067	0.917907
MEX3B	860.941	0.281906	0.162638	1.73333	0.0830369	0.580754	-0.0242886	0.162365	-0.149592	0.881086	0.962808	0.477874	0.159355	2.9988	0.00271043	0.0777684
MFAP5	0.600551	-0.587749	3.05184	-0.192588	0.847281		-1.40698	3.15621	-0.445781	0.655755		1.03651	2.88184	0.35967	0.719094
MFSD10	109.837	-0.282681	0.300302	-0.941323	0.346539	0.829551	-0.383721	0.297301	-1.29068	0.196814	0.519204	0.356835	0.290739	1.22734	0.219695	0.723054
MFSD14A	159.676	0.221941	0.363366	0.610792	0.541337	0.885563	0.55717	0.363833	1.53139	0.125673	0.425988	0.256313	0.360358	0.711273	0.476915	0.866778
MGC70870	1.48272	-0.0123085	1.46133	-0.00842278	0.99328	0.998521	-0.0550924	1.31961	-0.041749	0.966699	0.986203	0.334843	1.30573	0.256441	0.79761
MGEA5	93.9858	0.18437	0.396038	0.465536	0.641547	0.913174	0.315147	0.394755	0.798336	0.424676	0.718849	0.204369	0.385586	0.530022	0.596097	0.912493
MICALL1	4.70711	-0.190961	0.916812	-0.208288	0.835004	0.968652	-0.808713	0.949565	-0.851667	0.394399	0.694613	0.135072	0.856252	0.157748	0.874655	0.983757
MIF	561.64	-0.097776	0.344622	-0.28372	0.776625	0.951119	0.43843	0.344876	1.27127	0.203634	0.526886	0.0942106	0.337896	0.278815	0.780387	0.962792
MITF	29.193	-0.270705	0.319944	-0.8461	0.397497	0.839891	-1.21303	0.339775	-3.57011	0.000356829	0.00951675	-0.565554	0.316857	-1.78488	0.0742801	0.497284
MKI67	116.353	0.0573857	0.265157	0.216421	0.828659	0.968652	0.787087	0.253061	3.11027	0.00186917	0.0324033	1.27446	0.243859	5.22625	1.72986e-07	1.78101e-05
MKNK1	14.9465	-0.331276	0.522422	-0.634116	0.526005	0.88217	-0.4566	0.536843	-0.850528	0.395031	0.69474	0.348696	0.51958	0.671112	0.502149	0.87726
MLC1	0.0974252	0	9.22474	0	1		0	9.21431	0	1		-0.688499	9.01264	-0.0763926	0.939107
MLEC	27.3738	-0.272111	0.376125	-0.723458	0.469399	0.871661	-0.315216	0.375794	-0.8388	0.401581	0.698165	0.242553	0.370022	0.655509	0.51214	0.878751
MLIP	0.439296	0.6862	4.05277	0.169316	0.865548		-2.2436	4.1667	-0.538459	0.59026		1.57033	3.97683	0.394869	0.692939
MLLT11	2925.54	-0.106976	0.152359	-0.702135	0.482595	0.871661	-0.0307716	0.152369	-0.201954	0.839953	0.945364	0.0289011	0.14905	0.193902	0.846253	0.978767
MMADHC	409.243	0.115485	0.257651	0.448222	0.653993	0.918803	0.153617	0.257987	0.595444	0.551547	0.80338	-0.318942	0.253665	-1.25734	0.208631	0.715033
MMP1	1.12856	-1.20017	2.59178	-0.463068	0.643315		-2.51647	2.57799	-0.976136	0.328997	0.644452	-0.106153	2.27759	-0.0466075	0.962826
MMP2	758.086	0.140374	0.142987	0.981727	0.326235	0.825573	1.12064	0.141164	7.93856	2.04545e-15	4.51301e-13	0.457457	0.139197	3.28641	0.00101474	0.0369721
MMP3	0.620188	-1.59964	4.19443	-0.381373	0.702927		-2.65082	4.18767	-0.633007	0.526729		0.994251	4.06348	0.24468	0.806704
MMP8	0.193395	-2.08905	9.22066	-0.226562	0.820764		0	9.21431	0	1		-0.958145	9.01254	-0.106313	0.915334
MMP9	1.69481	-3.04845	1.68906	-1.80482	0.071103	0.55649	-3.72156	1.7782	-2.09288	0.03636	0.236006	-3.16473	1.73874	-1.82013	0.0687394	0.489932
MNAT1	328.257	-0.26774	0.13899	-1.92632	0.0540644	0.505936	-0.253052	0.139064	-1.81968	0.0688075	0.318694	0.135897	0.13525	1.00478	0.315001	0.811434
MND1	26.4764	1.01137	0.545991	1.85236	0.0639735	0.525725	0.590237	0.56634	1.0422	0.297321	0.615173	0.433442	0.564938	0.767238	0.44294	0.8617
MNDA	0.370742	0	9.22474	0	1		-0.768594	9.21431	-0.0834131	0.933523		-2.29101	9.00504	-0.254415	0.799175
MOB1A	100.795	0.174749	0.466839	0.374324	0.708163	0.934059	0.484563	0.468276	1.03478	0.300771	0.617118	0.420129	0.461837	0.909691	0.362986	0.840954
MOK	26.417	0.065343	0.415134	0.157402	0.874928	0.977761	-0.701439	0.418107	-1.67765	0.0934146	0.37051	-0.447173	0.395614	-1.13033	0.258338	0.775308
MORF4L1	29.4035	0.415824	0.447479	0.929259	0.352755	0.832501	0.585731	0.452598	1.29415	0.195612	0.5189	-0.739676	0.476137	-1.55349	0.120305	0.593045
MORF4L2	373.418	-0.166779	0.359928	-0.463368	0.6431	0.913952	0.0115366	0.36026	0.032023	0.974454	0.989021	-0.188412	0.353571	-0.532884	0.594114	0.911653
MORN2	60.6144	-0.609183	0.388684	-1.5673	0.117045	0.63685	-0.760593	0.390797	-1.94626	0.0516236	0.266865	-0.7775	0.380539	-2.04315	0.0410373	0.38371
MPC2	185.968	-0.0259948	0.144656	-0.1797	0.857388	0.972549	-0.194946	0.145299	-1.34169	0.179696	0.497289	-0.0769679	0.147422	-0.522091	0.601607	0.914682
MPDZ	49.2083	0.764741	0.337894	2.26325	0.02362	0.359986	0.0709972	0.33772	0.210225	0.833492	0.944375	0.224326	0.335161	0.669307	0.5033	0.87726
MPEG1	0.270432	-3.013	9.21306	-0.327035	0.743641		-0.769184	9.21431	-0.0834772	0.933472		0.53554	9.01264	0.059421	0.952617
MPI	1.28912	-0.59552	3.06142	-0.194524	0.845766	0.971042	-4.39067	3.2197	-1.36369	0.172665	0.487296	-1.90538	3.19227	-0.596874	0.550591
MPO	8.71309	-1.06473	0.707035	-1.50591	0.13209	0.658077	-0.108493	0.648302	-0.16735	0.867095	0.95726	-0.446384	0.645556	-0.691472	0.489269	0.871683
MPZL1	183.404	0.151921	0.267696	0.567515	0.570364	0.895958	-0.2031	0.269863	-0.752605	0.451687	0.738709	-0.0921571	0.26356	-0.349663	0.726591	0.946919
MRE11A	1270.54	-0.0163294	0.382126	-0.0427331	0.965914	0.998359	-0.194171	0.382075	-0.508203	0.611311	0.835556	0.0415805	0.37329	0.111389	0.911308	0.985568
MRPL12	768.7	-0.342782	0.182387	-1.87942	0.0601866	0.513478	0.268041	0.181874	1.47377	0.140543	0.448205	0.261142	0.177982	1.46724	0.142311	0.624503
MRPL13	343.876	0.324258	0.37905	0.855448	0.392303	0.838369	0.664336	0.37924	1.75176	0.0798157	0.34355	-0.207323	0.371396	-0.558226	0.57669	0.900023
MRPL14	200.869	0.0716998	0.210592	0.340467	0.733505	0.942375	0.30778	0.210669	1.46097	0.144025	0.453792	0.236299	0.21117	1.119	0.263141	0.77639
MRPL15	682.238	0.097138	0.235552	0.412385	0.680057	0.923738	0.350652	0.235419	1.48948	0.136361	0.444823	0.105686	0.230725	0.458062	0.646908	0.925573
MRPL19	35.2662	0.148891	0.533718	0.27897	0.780268	0.951119	1.16393	0.535984	2.17158	0.0298876	0.208122	-0.00989621	0.531642	-0.0186144	0.985149	0.998038
MRPL3	91.1308	0.357391	0.469747	0.760815	0.446767	0.858106	0.503916	0.47163	1.06846	0.285314	0.601257	0.0413655	0.469381	0.0881278	0.929775	0.986918
MRPL36	1213.53	0.126037	0.134041	0.940286	0.347071	0.829551	0.0111227	0.134247	0.0828525	0.933969	0.976623	0.0228478	0.131703	0.173479	0.862275	0.983757
MRPL37	151.022	0.263733	0.298654	0.883073	0.377197	0.838369	0.383299	0.298665	1.28337	0.199361	0.522516	0.176267	0.2963	0.594892	0.551916	0.894275
MRPL40	10.7738	-0.741658	0.583409	-1.27125	0.203641	0.731087	0.498185	0.571786	0.87128	0.383601	0.687085	-0.626736	0.626511	-1.00036	0.317137	0.811434
MRPL53	2.84774	-0.168976	0.941636	-0.17945	0.857585	0.972549	-1.27957	1.09184	-1.17194	0.241221	0.565283	0.873961	0.988411	0.884208	0.376584	0.849392
MRPL58	146.58	0.452238	0.230839	1.95911	0.0501002	0.500307	0.777596	0.229219	3.39236	0.000692924	0.0158908	0.389846	0.223014	1.74808	0.0804497	0.515834
MRPS16	143.971	-0.193869	0.211452	-0.916843	0.359225	0.836004	0.256111	0.211724	1.20964	0.226416	0.54461	0.232488	0.214324	1.08475	0.278033	0.782727
MRPS17	196.673	0.203313	0.461704	0.440353	0.659682	0.920126	0.684349	0.462423	1.47992	0.138895	0.448205	-0.32095	0.454816	-0.70567	0.480393	0.86913
MRPS2	32.1194	-0.103153	0.405689	-0.254266	0.79929	0.958898	-0.236652	0.406164	-0.582652	0.560127	0.808121	0.226545	0.389485	0.581651	0.560802	0.894275
MRPS23	4.88687	-0.879735	0.82989	-1.06006	0.289117	0.809223	-0.494076	0.868245	-0.569051	0.569321	0.811835	-0.359004	0.881828	-0.407114	0.683924	0.934587
MRPS6	849.356	0.394333	0.270717	1.45663	0.14522	0.672773	0.61514	0.270816	2.27143	0.0231207	0.177016	0.232312	0.265689	0.874376	0.381914	0.852262
MRVI1	1.43789	-3.8679	1.85356	-2.08674	0.0369117	0.426803	-4.31646	1.84114	-2.34445	0.0190552	0.159473	-3.61557	1.81969	-1.98692	0.0469314
MS4A1	0.558043	-2.75538	4.45604	-0.618346	0.536347		0.426266	4.43681	0.0960748	0.923461		2.67926	4.24615	0.630986	0.52805
MS4A4A	0.265611	0.393505	9.22474	0.0426576	0.965974		0	9.21431	0	1		-1.62681	9.0107	-0.180542	0.856727
MS4A6A	0.220464	0	9.22474	0	1		0	9.21431	0	1		-1.39189	9.00447	-0.154578	0.877154
MS4A7	0.248493	-1.2093	9.15098	-0.13215	0.894866		1.60776	9.09716	0.176732	0.859719		-0.426072	8.94058	-0.047656	0.96199
MSH2	40.9154	-0.130823	0.356203	-0.36727	0.713417	0.9347	0.0336804	0.356069	0.0945895	0.924641	0.974109	0.299624	0.357962	0.837028	0.402577	0.860523
MSH6	60.0499	0.419752	0.312346	1.34387	0.178991	0.709993	0.141271	0.313386	0.45079	0.652141	0.854284	0.226466	0.313026	0.723474	0.469389	0.866778
MSI2	1973	0.243451	0.124861	1.94978	0.0512028	0.500307	-0.0436816	0.124697	-0.350302	0.726112	0.893848	0.341448	0.12194	2.80013	0.0051082	0.120339
MSL2	5.2034	0.402433	0.687484	0.58537	0.558299	0.89287	0.156764	0.732301	0.21407	0.830492	0.944375	0.81334	0.695809	1.16891	0.242439	0.761124
MSMB	0
MSMO1	555.327	-0.161372	0.331005	-0.487519	0.62589	0.911547	0.260844	0.330777	0.788578	0.430359	0.722231	0.0534349	0.323461	0.165197	0.868789	0.983757
MSRA	1.96357	-1.10967	1.31121	-0.846292	0.39739	0.839891	-0.455679	1.18682	-0.383948	0.701017	0.880108	-2.47213	1.5729	-1.57171	0.116019	0.584934
MSX1	0.208122	0	9.22474	0	1		0	9.21431	0	1		0.731253	9.00065	0.0812445	0.935248
MT-ND6	26452.5	-1.38743	0.668456	-2.07557	0.037934	0.43211	-1.72655	0.668467	-2.58285	0.00979866	0.103397	-1.72488	0.653097	-2.64108	0.00826411	0.154126
MT1B	0
MT1E	2.22157	-1.52034	1.78568	-0.851409	0.394542	0.838369	0.0709787	1.57173	0.0451595	0.96398	0.986115	-2.62966	1.72774	-1.52203	0.128002	0.608216
MT1F	1.1416	-0.539825	1.60139	-0.337098	0.736043		-2.04684	1.90087	-1.07679	0.281572	0.598402	-1.44269	1.69356	-0.851869	0.394287
MT1G	68.5054	-0.32982	0.351604	-0.938046	0.348221	0.829551	-0.781664	0.36466	-2.14354	0.0320696	0.215604	-0.651172	0.372722	-1.74707	0.0806248	0.515834
MT1H	0.916193	-3.22955	2.29139	-1.40943	0.158708		0.290164	2.10053	0.138139	0.890131	0.964745	1.0979	2.04523	0.536808	0.5914
MT1HL1	0.310749	0.263287	4.91221	0.0535984	0.957255		1.1136	4.93785	0.225524	0.821572		2.11448	4.78455	0.441939	0.658533
MT1M	1.20461	-0.528589	2.93941	-0.179828	0.857288		-1.51089	2.91647	-0.518053	0.604421	0.83301	-0.303238	2.70469	-0.112116	0.910732
MT1X	1.57017	-1.11456	1.81508	-0.614057	0.539177	0.885563	-4.46472	2.01902	-2.21133	0.027013	0.196806	-2.26489	2.03017	-1.11562	0.264585	0.77639
MT2A	5.74642	-0.270635	0.936483	-0.288991	0.772588	0.951119	-2.16147	1.46728	-1.47311	0.140722	0.448205	-0.951271	1.49346	-0.636956	0.524153	0.882156
MT3	0.398766	-1.20943	4.14698	-0.291641	0.770561		-0.455704	4.14577	-0.10992	0.912473		-1.24327	4.05065	-0.306931	0.758896
MTA1	893.536	0.283152	0.308331	0.918338	0.358442	0.836004	-0.0398607	0.308153	-0.129353	0.897078	0.964745	0.291557	0.300841	0.969141	0.332475	0.824922
MTAP	31.4591	0.0234131	0.334046	0.0700896	0.944122	0.992143	0.0417849	0.335721	0.124463	0.900949	0.964745	0.098212	0.33321	0.294745	0.768189	0.959571
MTERFD	12.2364	-0.141735	0.6557	-0.216158	0.828864	0.968652	0.852383	0.658639	1.29416	0.19561	0.5189	0.0851758	0.692184	0.123054	0.902065	0.985271
MTF1	2.4102	0.70537	1.04096	0.677613	0.498017	0.872575	-0.0348168	1.03526	-0.0336308	0.973172	0.988237	-1.21239	1.14064	-1.0629	0.287826	0.796
MTF2	325.629	0.122318	0.22255	0.549619	0.582581	0.896588	-0.0458722	0.2238	-0.20497	0.837596	0.944375	0.0217235	0.220439	0.0985467	0.921498	0.986595
MTFR1	201.42	0.379021	0.242446	1.56332	0.117977	0.63685	0.186571	0.243032	0.767678	0.442678	0.732615	0.173545	0.241085	0.71985	0.471618	0.866778
MTHFD1	43.8137	0.154971	0.371619	0.417016	0.676667	0.922077	0.607493	0.369262	1.64515	0.0999379	0.380127	0.308494	0.372639	0.827865	0.407747	0.8617
MTHFD2	384.566	0.301727	0.215966	1.3971	0.162383	0.689801	0.828436	0.215813	3.83868	0.000123699	0.00384895	0.414469	0.215784	1.92076	0.0547615	0.441083
MTMR2	26.4098	0.116457	0.378065	0.308034	0.758056	0.948823	0.123752	0.38493	0.321492	0.747838	0.902799	0.0698876	0.400158	0.17465	0.861355	0.983757
MTND6P1	0.473658	-2.54543	5.42811	-0.468935	0.639116		-0.455934	5.43794	-0.0838431	0.933181		-1.24478	5.31446	-0.234225	0.81481
MTNR1A	0.757411	-0.24764	2.72558	-0.0908576	0.927606		1.57898	2.57631	0.612886	0.539952		-0.963847	2.5602	-0.376474	0.706565
MTNR1B	0.171469	0.809045	9.18077	0.0881239	0.929778		0	9.21431	0	1		-0.688499	9.01264	-0.0763926	0.939107
MTR	8.47092	-0.562571	0.6414	-0.877098	0.380434	0.838369	-0.87059	0.696183	-1.25052	0.21111	0.533714	0.539936	0.643704	0.838795	0.401585	0.860084
MUC1	31.4819	0.619748	0.375849	1.64893	0.0991626	0.60503	0.114249	0.380439	0.30031	0.763941	0.910651	0.736226	0.378124	1.94705	0.0515289	0.426111
MUC2	0.114429	-0.888822	9.22474	-0.096352	0.923241		0	9.21431	0	1		-1.73428	9.01001	-0.192484	0.847363
MUC20	2.97344	0.899152	0.803988	1.11837	0.263411	0.79358	0.77831	0.866847	0.897864	0.369258	0.67586	0.039484	0.862259	0.0457914	0.963477	0.992732
MUC3A	0.697387	-1.22262	2.26438	-0.539936	0.589241		1.80848	2.23553	0.808969	0.418533		0.390198	2.32664	0.167709	0.866813
MVP	44.0378	0.145818	0.25727	0.56679	0.570857	0.895958	0.153789	0.260172	0.591108	0.554448	0.803851	0.519572	0.258364	2.01101	0.0443244	0.39658
MX1	0.458635	-1.20944	4.18394	-0.289066	0.772531		-0.769995	4.18297	-0.184079	0.853952		-0.440579	4.03303	-0.109243	0.91301
MXRA5	2.4712	-2.12755	1.45603	-1.4612	0.143962	0.670559	-1.78568	1.32422	-1.34848	0.177505	0.496275	0.582863	1.1114	0.524439	0.599973	0.914682
MYB	12.43	-1.94801	0.52162	-3.73454	0.000188057	0.0160266	-1.25426	0.51988	-2.4126	0.0158393	0.143953	-0.553547	0.500371	-1.10627	0.268609	0.77639
MYBL1	42.2208	-0.43759	0.312253	-1.4014	0.161095	0.688914	0.27835	0.307304	0.905782	0.365051	0.672859	0.449836	0.281432	1.59838	0.109958	0.584934
MYBL2	55.1173	-0.0672858	0.296067	-0.227265	0.820218	0.967361	-1.13479	0.316504	-3.5854	0.000336565	0.00928232	-0.135868	0.292285	-0.46485	0.642039	0.923447
MYC	12.5715	-1.03389	0.550343	-1.87863	0.0602956	0.513478	-0.349823	0.520249	-0.672414	0.50132	0.777391	0.5227	0.516904	1.01121	0.311915	0.811434
MYCBP	1.44532	-1.49332	1.40189	-1.06522	0.286777	0.807678	1.34769	1.45113	0.928718	0.353035	0.6666	-1.66327	1.54268	-1.07817	0.280959
MYCBP2	225.796	0.143463	0.331358	0.432955	0.665048	0.920126	-0.336332	0.330562	-1.01745	0.308938	0.628492	0.36388	0.321357	1.13232	0.257498	0.775308
MYH11	0.894024	-1.07191	2.37509	-0.451314	0.651763		-3.9254	2.31621	-1.69475	0.0901221	0.366376	1.245	2.24839	0.55373	0.579764
MYL1	18.7006	-0.485959	0.711111	-0.683381	0.494366	0.872575	-0.295437	0.731886	-0.403666	0.686458	0.870542	-0.681368	0.715561	-0.952215	0.340988	0.82949
MYL12A	4.83813	-0.0934276	0.728806	-0.128193	0.897996	0.979283	0.38532	0.705836	0.545906	0.585131	0.81898	-1.39167	0.798344	-1.7432	0.0812993	0.51636
MYL4	52.4586	-0.65892	0.46054	-1.43076	0.1525	0.677112	-1.46602	0.472275	-3.10418	0.0019081	0.0326124	-1.03883	0.451976	-2.29841	0.0215386	0.256401
MYL9	0.596059	2.10832	2.57087	0.820082	0.41217		-1.21593	2.70505	-0.449505	0.653067		0.00984481	2.49087	0.00395236	0.996846
MYLK	2.94021	0.98574	0.90168	1.09323	0.274295	0.804838	-0.758682	1.01545	-0.747139	0.45498	0.742094	-0.969779	0.972996	-0.996694	0.318913	0.811434
MYO10	608.898	-0.207148	0.187484	-1.10488	0.269211	0.797127	-0.15715	0.186452	-0.842843	0.399316	0.696984	0.0291122	0.181472	0.160422	0.872548	0.983757
MYO18A	3.36513	-0.741843	0.791812	-0.936894	0.348813	0.829551	-1.2342	0.934536	-1.32066	0.186616	0.507754	-0.125256	0.757379	-0.165381	0.868644	0.983757
MYOCD	0.0923772	0	9.22474	0	1		1.97472	9.17767	0.215166	0.829638		-0.688387	9.01264	-0.0763801	0.939117
MZB1	0.26211	-1.60897	9.2235	-0.174443	0.861517		-1.39114	9.21424	-0.150978	0.879993		1.23771	8.99089	0.137663	0.890507
NAA20	16.3019	-1.15677	0.686668	-1.68462	0.0920627	0.595657	-0.0365475	0.650633	-0.0561721	0.955205	0.983017	-0.264938	0.62211	-0.42587	0.670202	0.929135
NAA50	4.24082	0.214056	0.770254	0.277903	0.781087	0.951119	0.810376	0.777035	1.04291	0.296991	0.615147	-1.33837	1.00365	-1.33349	0.182369	0.674616
NAIP	42.8611	-0.177498	0.338498	-0.524368	0.600023	0.899725	-0.1476	0.34845	-0.423591	0.671864	0.863215	-0.232312	0.354271	-0.655747	0.511987	0.878751
NAMPT	624.875	0.23681	0.15727	1.50575	0.13213	0.658077	0.276898	0.157407	1.75912	0.078557	0.341681	0.163095	0.15468	1.05441	0.291698	0.80003
NANOG	3.95823	-1.6889	1.2866	-1.31269	0.189289	0.721118	-1.81016	1.27747	-1.41698	0.156487	0.470043	-0.0707905	1.15064	-0.0615225	0.950943	0.992334
NARFL	40.1894	-0.82187	0.269568	-3.04884	0.0022973	0.0954645	-0.421408	0.261017	-1.61448	0.106423	0.391119	0.483899	0.262619	1.84259	0.0653887	0.479747
NAT1	14.9601	-0.52792	0.461245	-1.14455	0.252394	0.786208	-0.256601	0.458043	-0.560211	0.575336	0.815728	0.0605421	0.443529	0.136501	0.891425	0.983757
NAT2	0.874092	-2.69561	2.03677	-1.32347	0.185678		-1.22435	2.05628	-0.595417	0.551565	0.80338	-0.640502	1.77587	-0.360669	0.718347
NAV1	158.107	-0.602405	0.34158	-1.76358	0.0778021	0.570221	-0.708138	0.340378	-2.08045	0.0374845	0.236914	-0.0238457	0.331997	-0.071825	0.942741	0.990514
NCAM1	599.2	0.0146437	0.215938	0.0678143	0.945933	0.992518	-0.649248	0.215992	-3.00588	0.00264813	0.0409364	-0.120591	0.210915	-0.571753	0.567489	0.895898
NCAN	663.212	0.0112863	0.176016	0.0641208	0.948874	0.993614	-0.909228	0.176783	-5.14318	2.70132e-07	1.9867e-05	0.00470778	0.172232	0.0273339	0.978193	0.996952
NCAPD2	8.20326	-0.578011	0.859962	-0.672135	0.501498	0.872575	2.02287	0.852789	2.37206	0.0176892	0.152782	-0.17105	0.71805	-0.238215	0.811714	0.972821
NCAPG	367.95	-0.357981	0.154104	-2.32299	0.0201799	0.341956	0.16908	0.151695	1.1146	0.26502	0.579985	0.545378	0.144533	3.77337	0.000161057	0.00879135
NCAPG2	1.38612	1.4829	1.28419	1.15474	0.248197	0.784479	0.0894391	1.63804	0.0546013	0.956456	0.983017	0.64005	1.29648	0.493683	0.62153
NCAPH	18.5958	-0.409178	0.542527	-0.754207	0.450725	0.862209	0.800039	0.524547	1.5252	0.12721	0.428207	1.4333	0.525568	2.72714	0.00638862	0.139171
NCBP1	69.0625	0.176749	0.300924	0.587356	0.556965	0.89287	-0.0629064	0.300387	-0.209418	0.834122	0.944375	-0.279248	0.302661	-0.922643	0.356193	0.83535
NCBP2	1.22425	-1.69839	1.62495	-1.0452	0.295932	0.816819	-2.93391	1.76069	-1.66634	0.0956459	0.375012	-0.161188	1.50552	-0.107064	0.914738
NCEH1	11.0667	-0.644513	0.52644	-1.22429	0.220844	0.764155	-1.04411	0.55326	-1.88719	0.0591342	0.287274	-0.659565	0.570479	-1.15616	0.247616	0.766479
NCF2	0.579335	-1.23811	3.02582	-0.409182	0.682406		-2.61627	3.06297	-0.854161	0.393016		-2.14832	3.00237	-0.71554	0.474276
NCF4	0.238312	-1.20937	9.22474	-0.131101	0.895695		0.511916	9.21431	0.0555566	0.955695		0.00363293	9.01254	0.000403098	0.999678
NCK1	115.211	0.462292	0.324855	1.42307	0.154715	0.677503	0.391865	0.326496	1.20021	0.230057	0.550097	0.461068	0.322476	1.42978	0.152781	0.637474
NCK2	16.64	0.128166	0.410177	0.312464	0.754688	0.948823	0.404778	0.400921	1.00962	0.312677	0.629357	0.698553	0.40692	1.71669	0.0860366	0.527942
NCKAP1L	0.79204	-0.349977	2.43675	-0.143624	0.885797		2.36353	2.27717	1.03792	0.299306	0.616831	0.674713	2.35641	0.286332	0.774624
NCOA3	28.6572	0.11098	0.357814	0.310161	0.756439	0.948823	-0.0454226	0.354824	-0.128014	0.898138	0.964745	0.240199	0.350279	0.685736	0.49288	0.872509
NCR3LG1	0.767505	-3.26753	3.01103	-1.08519	0.27784		-2.48323	3.02833	-0.82	0.412216	0.706033	0.653961	2.8459	0.22979	0.818255
NDC80	0.662255	-0.445244	2.83521	-0.157041	0.875213		1.58348	2.75624	0.574506	0.565625		-1.41168	2.80305	-0.503624	0.614525
NDRG1	201.53	-0.637353	0.265323	-2.40218	0.0162976	0.307384	-0.472874	0.263126	-1.79714	0.0723134	0.326824	-0.0294321	0.258828	-0.113713	0.909465	0.985568
NDUFA1	559.824	0.298334	0.588704	0.506763	0.612321	0.903753	0.749037	0.589026	1.27165	0.203496	0.526886	-0.380006	0.576901	-0.658703	0.510087	0.878751
NDUFA13	354.959	0.116537	0.397501	0.293174	0.769389	0.951119	0.189433	0.398382	0.475507	0.634426	0.846214	-0.186577	0.391366	-0.476731	0.633553	0.923447
NDUFA4	99.5737	0.0859481	0.498073	0.172561	0.862996	0.973049	0.871242	0.500447	1.74093	0.0816963	0.348466	-0.383132	0.499886	-0.766438	0.443416	0.8617
NDUFB3	305.67	0.466905	0.659054	0.708448	0.478667	0.871661	0.981555	0.659769	1.48772	0.136823	0.445732	-0.355139	0.647866	-0.548167	0.583577	0.905091
NDUFV2	245.393	0.379897	0.651949	0.582709	0.560089	0.89287	0.539861	0.652963	0.826786	0.408358	0.701902	-0.350639	0.641627	-0.546484	0.584733	0.905283
NDUFV3	257.189	-0.102301	0.244461	-0.418476	0.675599	0.922077	0.385722	0.243704	1.58275	0.113478	0.404676	0.320689	0.241979	1.32528	0.18508	0.680881
NEAT1	0.590536	0.0729522	2.96821	0.0245778	0.980392		-0.12915	2.96787	-0.0435163	0.96529		1.19742	2.70351	0.442915	0.657827
NEFH	468.004	-0.250333	0.293887	-0.851802	0.394324	0.838369	-0.267718	0.292257	-0.916037	0.359648	0.671951	0.337255	0.285156	1.18271	0.236926	0.748926
NEFL	2013	0.409949	0.26343	1.5562	0.119661	0.63685	0.462445	0.26343	1.75547	0.0791785	0.342679	0.246534	0.257629	0.956934	0.338601	0.826375
NEIL3	16.6666	0.0905746	0.522822	0.173242	0.862461	0.973049	0.776182	0.531262	1.46102	0.144011	0.453792	0.19941	0.547643	0.364125	0.715765	0.946919
NEK2	88.9373	0.735932	0.289189	2.54481	0.0109337	0.23926	1.84556	0.281903	6.54679	5.87883e-11	7.50943e-09	1.69327	0.275697	6.14177	8.16046e-10	1.38615e-07
NENF	19.0889	0.0585757	0.471457	0.124244	0.901122	0.98037	1.29774	0.477558	2.71744	0.00657891	0.0794379	-0.928624	0.531	-1.74882	0.0803218	0.515834
NES	10.5938	-0.993268	0.779359	-1.27447	0.202498	0.731087	-1.79719	0.849147	-2.11647	0.0343051	0.227482	-1.5025	0.832801	-1.80415	0.0712071	0.494911
NET1	244.439	-0.125936	0.299253	-0.420835	0.673876	0.922077	0.129241	0.299246	0.431888	0.665823	0.860007	0.178405	0.294233	0.606339	0.54429	0.890879
NEUROD1	161.567	0.377786	0.369386	1.02274	0.30643	0.820497	0.600573	0.369885	1.62367	0.104445	0.386412	0.455757	0.366905	1.24216	0.214176	0.717936
NEUROG1	0.761744	-1.18329	4.21916	-0.280456	0.779128		-1.80092	4.12693	-0.436384	0.662558	0.859217	-0.0478702	4.07471	-0.0117481	0.990627
NEUROG2	2.30024	-1.82037	1.34329	-1.35516	0.175367	0.70669	-4.87926	1.56471	-3.11832	0.00181885	0.0319664	-0.509888	1.36133	-0.374552	0.707994	0.944273
NFATC3	379.296	0.277562	0.174375	1.59175	0.111441	0.620884	0.255721	0.172991	1.47823	0.139346	0.448205	0.511587	0.169805	3.0128	0.00258852	0.0772513
NFATC4	194.8	-0.0703221	0.270853	-0.259632	0.795148	0.957672	-0.121705	0.268975	-0.452477	0.650925	0.854284	0.289004	0.262896	1.09931	0.271632	0.77639
NFE2L2	1210.67	-0.314194	0.219372	-1.43225	0.152073	0.677112	-0.0441687	0.218653	-0.202004	0.839914	0.945364	0.124081	0.213488	0.581209	0.5611	0.894275
NFE2L3	14.9824	0.201331	0.446958	0.450446	0.652389	0.917571	-0.134479	0.45766	-0.293841	0.768879	0.912121	-0.161836	0.452626	-0.357549	0.720681	0.946919
NFIL3	333.991	-0.292698	0.411399	-0.711469	0.476794	0.871661	-0.260897	0.411271	-0.634369	0.52584	0.788631	0.146327	0.401429	0.364514	0.715474	0.946919
NFKB1	52.4149	0.134669	0.297233	0.453074	0.650495	0.91675	0.566638	0.289169	1.95954	0.0500498	0.262356	1.02986	0.29097	3.53941	0.000401015	0.0175975
NFKB2	32.8569	-0.123548	0.400242	-0.308684	0.757562	0.948823	-0.484255	0.407337	-1.18883	0.234507	0.557441	0.815948	0.390982	2.08692	0.0368953	0.359008
NFKBIA	4.51453	-0.269359	0.714499	-0.376991	0.706181	0.934059	0.122481	0.840746	0.145681	0.884173	0.964163	-0.8433	0.813733	-1.03633	0.300046	0.807308
NFKBIB	254.172	-0.400654	0.686572	-0.583557	0.559518	0.89287	-1.21166	0.687653	-1.76203	0.0780649	0.34015	-0.187995	0.670752	-0.280275	0.779267	0.962472
NFKBIE	17.0678	-0.0585063	0.407054	-0.143731	0.885713	0.979283	0.465787	0.405938	1.14744	0.251201	0.568245	-0.824161	0.455201	-1.81054	0.0702116	0.493688
NFKBIZ	14.3062	0.00538746	0.54516	0.00988234	0.992115	0.998521	-0.498842	0.557212	-0.895247	0.370655	0.676885	-1.05067	0.584526	-1.79747	0.0722604	0.497284
NFYB	17.2829	0.525239	0.592238	0.886871	0.375149	0.838369	0.100891	0.619049	0.162978	0.870536	0.958616	0.569938	0.617236	0.923372	0.355814	0.83535
NGB	0.232	-0.247638	9.21293	-0.0268794	0.978556		-0.129296	9.20254	-0.01405	0.98879		-0.284359	9.00067	-0.0315931	0.974797
NGFR	4.28286	0.0154931	0.88663	0.0174741	0.986058	0.998521	-0.813715	0.921257	-0.883266	0.377093	0.682988	-0.500717	0.917789	-0.545569	0.585362	0.905283
NGRN	3153.45	-0.147301	0.122962	-1.19794	0.230941	0.773422	-0.267707	0.122909	-2.1781	0.0293989	0.207416	0.00133131	0.119872	0.0111061	0.991139	0.998038
NHLH1	244.6	0.00310491	0.451408	0.00687828	0.994512	0.998521	-0.68817	0.451956	-1.52265	0.127847	0.428334	-0.0272003	0.442092	-0.0615264	0.95094	0.992334
NHP2	307.298	-0.0274854	0.213244	-0.128891	0.897444	0.979283	0.339558	0.213726	1.58875	0.112116	0.400745	-0.145238	0.211141	-0.687875	0.491531	0.872509
NID2	0.168988	0	9.22474	0	1		-1.08951	9.21431	-0.118241	0.905876		2.27239	8.97438	0.253209	0.800107
NIPSNAP1	4.30644	0.0220087	0.878196	0.0250613	0.980006	0.998359	1.33417	0.920611	1.44922	0.147276	0.457668	-0.692924	1.04295	-0.664386	0.506443	0.87726
NIPSNAP3A	28.0404	0.571463	0.625757	0.913235	0.361119	0.836613	0.393709	0.635323	0.6197	0.535456	0.794832	-0.304165	0.622644	-0.488506	0.625192	0.922572
NISCH	511.008	-0.0884744	0.183848	-0.481236	0.630349	0.911547	-0.196094	0.182999	-1.07156	0.283918	0.600758	0.374607	0.179079	2.09186	0.0364514	0.357799
NIT1	336.436	-0.906802	0.224659	-4.03635	5.42883e-05	0.0065746	-0.389309	0.221582	-1.75695	0.0789265	0.342674	-0.140201	0.216507	-0.647559	0.51727	0.878993
NKG7	0.211164	0	9.22474	0	1		0.280554	9.16675	0.0306056	0.975584		-0.958028	9.01254	-0.1063	0.915345
NLGN1	1.99711	0.0649163	1.45572	0.044594	0.964431	0.998314	-3.25374	1.84056	-1.7678	0.0770944	0.336834	-1.5162	1.72332	-0.879813	0.378961	0.850666
NLRC5	15.2468	-0.679667	0.50548	-1.3446	0.178756	0.709993	-1.01652	0.488324	-2.08165	0.0373748	0.236914	0.303238	0.463505	0.654228	0.512965	0.878751
NLRX1	0.684651	-1.90883	2.61608	-0.729653	0.465602		1.85328	2.49149	0.743844	0.456971		-0.390253	2.54417	-0.153391	0.87809
NME1	11764.4	-0.0976557	0.144931	-0.673809	0.500433	0.872575	0.509837	0.144902	3.51849	0.000434003	0.0110876	0.0197161	0.141666	0.139173	0.889313	0.983757
NME2	1175.8	-0.145014	0.24905	-0.582266	0.560387	0.89287	0.54176	0.248949	2.17619	0.0295412	0.207816	-0.0956159	0.244252	-0.391465	0.695454	0.939303
NMRAL2P	0.491958	-1.91459	3.53949	-0.540922	0.588561		-0.770137	3.54653	-0.217152	0.82809		-0.230773	3.46456	-0.0666096	0.946893
NMT1	76.0092	-0.0175328	0.25442	-0.0689127	0.945059	0.992143	0.125303	0.247447	0.506385	0.612586	0.835556	0.676588	0.244081	2.77198	0.00557172	0.128552
NNMT	3.83553	1.26756	0.864183	1.46678	0.142437	0.669485	-1.10363	0.965293	-1.14331	0.252911	0.568974	-1.22548	1.03095	-1.18869	0.23456	0.746174
NNT	948.773	-0.346174	0.28041	-1.23453	0.217006	0.756563	-0.694342	0.280305	-2.4771	0.0132456	0.127468	-0.151715	0.27332	-0.555084	0.578838	0.900932
NOC3L	231.132	0.197329	0.195611	1.00878	0.31308	0.820497	0.316569	0.193592	1.63524	0.101999	0.381631	0.381302	0.190451	2.0021	0.0452736	0.400011
NOD2	1.05207	0.775606	1.92023	0.403914	0.686276		-0.0210649	1.97154	-0.0106845	0.991475	0.996021	0.889777	1.84616	0.481962	0.629833
NOL11	101.572	0.669031	0.352218	1.89948	0.0575017	0.510903	0.69024	0.354213	1.94866	0.0513363	0.266795	0.177827	0.35511	0.500766	0.616536	0.920182
NOL3	124.85	-0.513356	0.578056	-0.888073	0.374501	0.838369	-1.02311	0.578568	-1.76836	0.0770012	0.336834	-0.259794	0.564653	-0.460094	0.645449	0.924785
NOLC1	767.132	0.262058	0.154881	1.692	0.0906467	0.594355	0.435272	0.154028	2.82593	0.00471429	0.0611849	0.364181	0.150634	2.41766	0.0156207	0.217577
NOP56	2607.03	0.230576	0.0970391	2.37611	0.0174962	0.314926	0.263368	0.0968898	2.71822	0.00656337	0.0794379	0.128297	0.0951517	1.34834	0.177548	0.666699
NOP58	543.317	0.354085	0.219497	1.61316	0.106709	0.609057	0.503942	0.2193	2.29795	0.0215644	0.17052	0.491551	0.215168	2.2845	0.0223423	0.258779
NOS1	0.137001	1.81984	9.18103	0.198217	0.842875		-0.864478	9.21284	-0.093834	0.925241		0	9.01264	0	1
[truncated: 1,256 more rows]

## Sheet: 2. Car_time
Probe_ID	baseMean	log2FC.Car_4h	lfcSE.Car_4h	stat.Car_4h	pval.Car_4h	FDR.Car_4h	log2FC.Car_16h	lfcSE.Car_16h	stat.Car_16h	pval.Car_16h	FDR.Car_16h	log2FC.Car_24h	lfcSE.Car_24h	stat.Car_24h	pval.Car_24h	FDR.Car_24h
A2M	0.252668	0	9.22474	0	1		-0.649108	9.22474	-0.070366	0.943902		-0.922773	9.0107	-0.102409	0.918432
AARS	743.244	-0.229035	0.355806	-0.643707	0.519766	0.779257	-0.142046	0.355507	-0.39956	0.689481	0.810887	0.0270481	0.346899	0.0779711	0.937851	0.979722
AASDHPPT	138.992	0.280456	0.345182	0.812488	0.416511	0.708862	0.777611	0.346542	2.24392	0.0248378	0.110282	0.152505	0.344585	0.442577	0.658072	0.852983
AATF	180.234	-0.321944	0.190983	-1.68572	0.0918495	0.345549	-0.0117993	0.186102	-0.0634025	0.949446	0.97958	0.404942	0.177608	2.27998	0.0226088	0.114625
ABCA1	25.5982	-0.697725	0.53943	-1.29345	0.195856	0.490402	0.0416008	0.516391	0.0805607	0.935791	0.969753	0.62136	0.496164	1.25233	0.210451	0.484031
ABCA6	3.13764	1.64967	0.977449	1.68773	0.0914636	0.344772	0.249721	1.087	0.229733	0.818299	0.900086	1.10888	0.870915	1.27323	0.202935	0.474437
ABCA8	0.0429157	0	9.22474	0	1		-0.328516	9.22474	-0.0356125	0.971591		-0.9462	9.01264	-0.104986	0.916387
ABCB1	2.44043	-0.337384	1.0054	-0.335571	0.737194	0.898765	1.34237	0.963554	1.39314	0.163576	0.35233	-0.38805	0.944312	-0.410934	0.681121	0.863879
ABCB10	12.8613	-0.535067	0.598484	-0.894038	0.371301	0.682511	-0.3052	0.60337	-0.505825	0.612979	0.766609	-0.0621996	0.647199	-0.0961058	0.923437	0.972023
ABCB11	0.208398	-1.6428	9.22112	-0.178156	0.858601		-0.328516	9.22474	-0.0356125	0.971591		1.70458	8.97664	0.18989	0.849395
ABCB6	29.7559	0.751489	0.394375	1.90552	0.0567126	0.263654	0.892978	0.393497	2.26934	0.0232478	0.106326	1.33416	0.382738	3.48584	0.000490598	0.00679651
ABCC1	143.674	0.0169595	0.201496	0.084168	0.932923	0.979438	0.417925	0.195343	2.13945	0.0323996	0.129415	0.68415	0.188525	3.62897	0.000284559	0.00451763
ABCC2	9.64831	2.49329	0.572306	4.35657	1.32119e-05	0.000638576	-0.629823	0.627025	-1.00446	0.315155	0.520252	1.53482	0.554425	2.76831	0.0056347	0.0453907
ABCC3	1.43764	0.173013	1.64135	0.105409	0.916051	0.000638576	-1.33018	1.93666	-0.686842	0.492182		1.26205	1.51302	0.834128	0.404209
ABCC4	342.229	0.154521	0.178034	0.86793	0.385433	0.692251	-0.405399	0.180359	-2.24773	0.0245931	0.110282	-0.0332949	0.17286	-0.192612	0.847263	0.942646
ABCC5	1257.95	-0.543554	0.34278	-1.58572	0.112802	0.380915	-0.251337	0.342427	-0.733986	0.462957	0.647833	0.13155	0.334235	0.393586	0.693887	0.870119
ABCF1	266.191	-0.014689	0.149719	-0.0981107	0.921844	0.975304	0.136669	0.146889	0.930424	0.352151	0.551591	0.346391	0.142818	2.4254	0.0152917	0.0890238
ABCF3	59.3196	0.0213828	0.512752	0.041702	0.966736	0.989608	0.0128023	0.50708	0.0252471	0.979858	0.992794	-0.0770584	0.492115	-0.156586	0.875571	0.953614
ABCG1	1.31829	-2.47197	1.83974	-1.34365	0.179062		-1.1009	1.64716	-0.668364	0.503902		0.373924	1.4532	0.257311	0.796939
ABCG2	0.255074	0	9.22474	0	1		0	9.22474	0	1		1.24468	8.98268	0.138564	0.889795
ABHD4	5.43869	0.647321	0.562309	1.15118	0.249657	0.558777	-0.176372	0.628707	-0.280531	0.77907	0.876857	0.168212	0.610181	0.275676	0.782797	0.924509
ABHD6	340.05	-0.748244	0.371243	-2.01551	0.043851	0.222994	-1.615	0.373929	-4.31901	1.56729e-05	0.000337926	-1.18447	0.361842	-3.27343	0.00106251	0.0125595
ABL1	10.5456	0.310127	0.555543	0.558241	0.57668	0.813605	1.22026	0.541084	2.2552	0.0241205	0.10937	0.817464	0.521614	1.56718	0.117072	0.337708
ACAA1	102.397	0.389342	0.294257	1.32314	0.18579	0.483977	0.618621	0.292646	2.11389	0.0345246	0.134908	0.534517	0.281943	1.89583	0.0579823	0.224277
ACADL	1.90512	-4.37275	1.70547	-2.56396	0.0103485	0.0914963	-3.04945	1.72921	-1.76349	0.0778173		-0.896083	1.45101	-0.61756	0.536866	0.76898
ACADM	137.96	0.125621	0.42773	0.293692	0.768993	0.92058	0.810777	0.42791	1.89474	0.0581273	0.18196	-0.0334401	0.419957	-0.0796276	0.936533	0.978837
ACADVL	457.984	-0.310054	0.313837	-0.987945	0.32318	0.645469	-0.0939544	0.31277	-0.300395	0.763876	0.866951	0.516341	0.304258	1.69705	0.0896869	0.290575
ACAT1	83.914	-0.179313	0.262267	-0.683706	0.494161	0.764438	0.148203	0.267859	0.553286	0.580068	0.7397	0.282374	0.262761	1.07464	0.282535	0.563045
ACAT2	117.109	0.129163	0.448875	0.287748	0.77354	0.922357	0.28201	0.451352	0.624812	0.532094	0.704458	-0.636914	0.447185	-1.42427	0.154367	0.403666
ACBD3	70.2628	0.384872	0.205461	1.87321	0.0610392	0.274298	0.150054	0.210675	0.712256	0.476306	0.656942	0.238048	0.200225	1.1889	0.234479	0.510141
ACD	68.0522	-0.776173	0.272299	-2.85045	0.00436579	0.0533856	0.166577	0.257178	0.647712	0.517171	0.691635	-0.0296797	0.255044	-0.116371	0.907359	0.965561
ACE	2.46022	-3.63882	1.59133	-2.28664	0.0222166	0.148681	-2.20369	1.59877	-1.37836	0.168091	0.357767	-0.982615	1.20207	-0.817433	0.413681	0.677104
ACE2	0.302888	-0.508061	5.40241	-0.0940434	0.925075		-0.0142203	5.40221	-0.00263232	0.9979		-1.725	5.27651	-0.326921	0.743727
ACHE	6.53956	-4.76177	1.39464	-3.41434	0.000639372	0.0140468	-0.486165	0.827489	-0.587519	0.556855	0.720152	-2.22652	1.0179	-2.18737	0.0287158	0.135776
ACLY	171.625	0.11623	0.493339	0.235599	0.813744	0.942243	-0.0123567	0.495587	-0.0249334	0.980108	0.992794	0.000892933	0.484804	0.00184184	0.99853	0.999999
ACMSD	0.0961642	0	9.22474	0	1		0	9.22474	0	1		-0.9462	9.01264	-0.104986	0.916387
ACOT9	1.24907	0.128298	1.35457	0.0947147	0.924541		-0.972187	1.75284	-0.554634	0.579145		1.14536	1.307	0.876325	0.380853
ACOX1	42.243	-0.0613065	0.294189	-0.208392	0.834923	0.949769	0.241385	0.289961	0.832474	0.405142	0.597993	1.1213	0.278417	4.02742	5.63934e-05	0.00116815
ACP1	147.777	-0.0570577	0.160637	-0.355196	0.722443	0.893299	-0.108807	0.16453	-0.661322	0.508406	0.683808	-0.247586	0.162495	-1.52365	0.127596	0.358654
ACPP	0.0661973	0	9.22474	0	1		0	9.22474	0	1		1.63184	8.97157	0.18189	0.855669
ACSL1	22.0647	-0.108251	0.542082	-0.199696	0.841719	0.953744	0.395077	0.538808	0.733243	0.46341	0.648038	0.103454	0.526963	0.19632	0.844359	0.942646
ACSL5	0.123027	0	9.22474	0	1		-0.328516	9.22474	-0.0356125	0.971591		0.277839	9.01264	0.0308277	0.975407
ACTA1	3.46867	-1.21007	1.04934	-1.15317	0.24884	0.558541	0.463807	1.08514	0.427415	0.669077	0.798296	-1.65335	1.04705	-1.57905	0.114324	0.333763
ACTA2	189.604	-0.28077	0.28863	-0.972768	0.330668	0.650119	0.273071	0.28682	0.952064	0.341065	0.542673	0.261427	0.278168	0.939816	0.347312	0.619313
ACTG2	3.72009	-0.470116	1.07348	-0.437938	0.661431	0.866466	0.808042	1.02583	0.787695	0.430875	0.620613	0.843784	0.996102	0.847085	0.396948	0.66705
ACTL6A	627.339	0.171399	0.363176	0.471944	0.636967	0.853256	0.391736	0.363598	1.07739	0.281307	0.485623	-0.0762216	0.355868	-0.214185	0.830403	0.938242
ACTN1	789.908	-0.647533	0.340996	-1.89894	0.0575719	0.264175	-0.838011	0.340627	-2.4602	0.0138858	0.0762096	-0.189962	0.331876	-0.572388	0.567059	0.793664
ACTN2	8.85973	0.392592	0.625065	0.628082	0.529951	0.783705	-0.465505	0.62685	-0.74261	0.457718	0.643902	-0.149581	0.598844	-0.249782	0.802756	0.928345
ADAM10	1506.42	0.233295	0.172119	1.35542	0.175283	0.473872	-0.00547127	0.171962	-0.0318168	0.974618	0.990557	0.110246	0.167246	0.659181	0.50978	0.751158
ADAM12	33.1717	-1.659	0.42657	-3.88917	0.000100587	0.00370806	-1.32007	0.392766	-3.36097	0.000776687	0.00882333	-0.883475	0.353372	-2.50013	0.0124149	0.078724
ADAM8	23.148	-0.136469	0.867153	-0.157375	0.874949	0.965374	-1.76794	0.886802	-1.99361	0.0461948	0.160542	-1.63862	0.864874	-1.89464	0.0581402	0.224277
ADAMTS5	1.41466	-0.699481	1.65461	-0.422748	0.672479		-2.76423	1.75486	-1.57518	0.115214		-3.03328	1.73015	-1.75319	0.0795701
ADAT1	6.69005	-0.552541	0.680069	-0.812478	0.416518	0.708862	0.0864019	0.66409	0.130106	0.896483	0.944772	-0.0101756	0.739234	-0.013765	0.989017	0.999127
ADCK3	154.217	0.208455	0.410718	0.507537	0.611778	0.841098	0.81126	0.409614	1.98055	0.047642	0.163686	0.280032	0.401104	0.698152	0.485082	0.735229
ADCY1	8.09008	-0.871091	0.722628	-1.20545	0.22803	0.536759	-1.37611	0.620831	-2.21656	0.0266533	0.115171	0.446169	0.545879	0.817341	0.413734	0.677104
ADCY4	0.376892	-0.828643	5.42992	-0.152607	0.878708		-0.64909	5.42992	-0.11954	0.904848		0.171822	5.20003	0.0330426	0.973641
ADGRE5	2.60992	-1.93546	1.42548	-1.35777	0.174538	0.473572	-1.07084	1.18661	-0.902438	0.366824	0.559691	0.550226	1.02847	0.534995	0.592653	0.813262
ADGRG1	37.0632	-0.834026	0.33639	-2.47934	0.0131625	0.11011	-0.869984	0.342209	-2.54226	0.0110139	0.0653717	0.308619	0.30826	1.00116	0.316747	0.595891
ADGRG3	0.348677	-1.32323	7.61991	-0.173655	0.862137		0	7.6219	0	1		-1.21577	7.44653	-0.163267	0.870308
ADH1A	0.527324	-1.77197	4.52404	-0.391679	0.695295		-0.328507	4.53333	-0.0724647	0.942232		-2.64846	4.41174	-0.600321	0.548292
ADH1B	0.329523	0.774366	6.75137	0.114698	0.908685		-1.46049	6.74874	-0.216409	0.828669		1.56973	6.56468	0.239118	0.811014
ADH5	200.25	0.215108	0.512953	0.419352	0.674959	0.872273	0.803419	0.513983	1.56312	0.118023	0.287308	-0.248235	0.505158	-0.4914	0.623144	0.83142
ADI1	58.056	0.830307	0.499963	1.66074	0.096766	0.355834	0.922557	0.501477	1.83968	0.0658152	0.196506	0.715692	0.499088	1.434	0.151572	0.40057
ADIPOQ	0.909949	-1.21163	3.01783	-0.40149	0.688059		1.35401	2.91454	0.464571	0.642239		2.8095	2.76958	1.01442	0.310384
ADIRF	0.933332	0.548065	2.6033	0.210527	0.833257		-2.63142	2.70056	-0.974395	0.32986		-1.55179	2.61309	-0.593852	0.552611
ADM	2.51685	-0.959001	1.5116	-0.634427	0.525802	0.781695	3.35652	1.25298	2.67883	0.00738805	0.0490877	1.3924	1.15034	1.21043	0.226113	0.502346
ADO	112.527	-0.0365827	0.411724	-0.0888523	0.929199	0.978697	0.615486	0.409892	1.50158	0.133205	0.309299	0.035815	0.403415	0.0887795	0.929257	0.975709
ADORA2A	7.63964	0.961319	0.625268	1.53745	0.124183	0.400424	0.521991	0.634233	0.823027	0.410493	0.601505	0.489196	0.611011	0.800634	0.423343	0.687143
ADRB2	0.735275	-2.72173	3.35507	-0.811228	0.417235		0.689652	3.31458	0.208066	0.835177		1.38849	3.2397	0.428586	0.668225
ADSL	12.2886	0.512116	0.595849	0.859473	0.39008	0.694866	0.204833	0.604631	0.338774	0.73478	0.845149	0.280016	0.601728	0.465353	0.641679	0.84739
AEN	51.9765	0.694671	0.34706	2.00159	0.0453291	0.227963	1.152	0.338606	3.40218	0.000668497	0.00802577	1.74005	0.331792	5.24439	1.56796e-07	5.54646e-06
AFP	0.278111	0	9.22474	0	1		0	9.22474	0	1		-1.21584	9.01254	-0.134906	0.892687
AGL	47.6774	-0.837905	0.438348	-1.9115	0.0559398	0.261654	0.474806	0.424193	1.11932	0.263005	0.469366	0.220169	0.412296	0.534007	0.593336	0.813683
AGR2	0
AGR3	0.191715	-0.508062	9.22474	-0.0550761	0.956078		-0.328516	9.22474	-0.0356125	0.971591		0.686926	8.98225	0.0764759	0.93904
AGXT2	0.564857	-1.78785	5.42078	-0.329814	0.741541		-0.64909	5.42867	-0.119567	0.904826		-2.28592	5.28215	-0.432762	0.665188
AHCY	371.641	0.167142	0.251109	0.665615	0.505657	0.767539	0.146096	0.252872	0.577746	0.563435	0.725048	0.0598175	0.246564	0.242604	0.808312	0.930563
AHR	0.220512	1.59652	9.20899	0.173365	0.862364		0.953812	9.22474	0.103397	0.917648		-0.759626	9.01168	-0.0842935	0.932823
AHRR	5.16682	1.87703	0.651519	2.88101	0.00396402	0.0504195	0.658622	0.636531	1.03471	0.300806	0.507265	1.71697	0.578674	2.96707	0.00300651	0.0277083
AHSA1	645.839	0.935471	0.136831	6.83671	8.10344e-12	1.60227e-09	0.879684	0.136928	6.42441	1.32383e-10	7.60573e-09	0.56881	0.134228	4.23764	2.25883e-05	0.000496258
AHSP	1.58648	-3.43571	1.93986	-1.77112	0.076541		2.01214	1.74583	1.15255	0.249097		-0.170073	1.6486	-0.103162	0.917835
AIF1	2.61126	-0.227204	1.10983	-0.204721	0.83779	0.950562	-0.570569	1.24932	-0.456702	0.647886	0.786435	-1.13873	1.22871	-0.92677	0.354046	0.626566
AIFM1	114.654	-0.0500849	0.394289	-0.127026	0.89892	0.967418	0.240144	0.393062	0.610958	0.541227	0.711645	0.344266	0.383542	0.897597	0.3694	0.643601
AIFM2	7.50237	1.33128	0.70374	1.89172	0.0585282	0.267435	1.55933	0.661083	2.35875	0.0183367	0.090739	1.57207	0.632537	2.48535	0.0129425	0.0799716
AK3	21.5694	-0.398837	0.436796	-0.913096	0.361192	0.675489	0.784475	0.419298	1.87092	0.0613557	0.189816	-0.314407	0.437434	-0.718753	0.472293	0.725453
AKAP8	554.028	0.186522	0.248057	0.751934	0.452091	0.736001	0.0568796	0.247382	0.229926	0.818149	0.900086	0.189174	0.240748	0.785776	0.431999	0.692918
AKAP8L	31.941	0.606438	0.350538	1.73002	0.0836266	0.327136	0.662918	0.356502	1.85951	0.0629555	0.191653	0.508875	0.353	1.44157	0.149423	0.396962
AKR1B1	4.45067	-0.952934	0.695112	-1.37091	0.170404	0.470939	-1.9133	1.02142	-1.87318	0.0610438	0.189128	0.265422	0.70046	0.378926	0.704743	0.877901
AKR1B10	53.9128	-0.597508	0.438389	-1.36296	0.172895	0.473014	0.149424	0.441725	0.338275	0.735156	0.845149	-0.402833	0.431452	-0.933667	0.350476	0.622709
AKR1C2	0.277355	-0.508062	9.22474	-0.055076	0.956078		-1.54766	9.22224	-0.167819	0.866726		0.0155356	9.01264	0.00172376	0.998625
AKR1C3	6.71902	0.115469	0.670483	0.172218	0.863266	0.95943	-0.608926	0.764915	-0.796071	0.425991	0.615877	-0.163496	0.716383	-0.228225	0.819472	0.934146
AKR7A2	972.166	-1.43458	0.546106	-2.62692	0.00861603	0.0804286	-1.73997	0.546371	-3.1846	0.00144954	0.0143793	-1.23243	0.532868	-2.31283	0.020732	0.108655
AKT1	5384.13	-0.376404	0.291583	-1.2909	0.196738	0.490757	-1.03579	0.291718	-3.55065	0.00038428	0.00513913	-0.717456	0.284816	-2.51902	0.0117683	0.0757277
ALAS1	645.185	-0.205532	0.119968	-1.71322	0.0866715	0.333647	-0.186188	0.11921	-1.56185	0.118324	0.287434	0.114347	0.115443	0.990508	0.321926	0.600505
ALAS2	0.353384	-1.81252	9.21997	-0.196586	0.844152		1.4302	9.19817	0.155487	0.876437		-1.1857	9.01257	-0.131561	0.895332
ALB	0.417071	-2.61297	4.50582	-0.579909	0.561976		0.633294	4.52943	0.139818	0.888804		3.13158	4.30413	0.727576	0.466873
ALDH1L1	0.0565445	0	9.22474	0	1		0	9.22474	0	1		-0.683896	9.01264	-0.0758819	0.939513
ALDH2	590.5	-0.624538	0.352469	-1.77189	0.0764122	0.310068	-1.00878	0.352726	-2.85996	0.00423697	0.0329144	-0.639419	0.343395	-1.86205	0.0625959	0.23514
ALDH3A1	0.197481	-1.50208	9.22207	-0.162879	0.870614		-0.328516	9.22474	-0.0356125	0.971591		-1.50384	9.01221	-0.166867	0.867475
ALDH3A2	32.2303	-0.626498	0.478761	-1.30858	0.190676	0.485326	-0.235786	0.473584	-0.497876	0.618572	0.767945	0.149639	0.473815	0.315816	0.752142	0.909849
ALDH7A1	50.0975	0.0158111	0.302816	0.0522137	0.958358	0.989288	-0.921584	0.318897	-2.88991	0.00385349	0.0307261	0.232115	0.291361	0.796659	0.425649	0.687806
ALDH8A1	3.38703	1.02026	1.0313	0.989295	0.322519	0.64511	0.82816	1.04567	0.791991	0.428366	0.617841	-1.64515	1.16643	-1.4104	0.15842	0.409955
ALDH9A1	422.236	0.0939957	0.156176	0.601859	0.547268	0.793538	0.197087	0.155652	1.2662	0.20544	0.407321	0.274413	0.150246	1.82642	0.0677863	0.246136
ALDOA	2559.12	0.454174	0.166979	2.71994	0.00652936	0.066673	0.696945	0.1667	4.18082	2.90453e-05	0.000590123	0.795422	0.162611	4.89156	1.00042e-06	3.15349e-05
ALDOC	10.6233	0.736151	0.526104	1.39925	0.161738	0.459844	0.67104	0.537167	1.24922	0.211585	0.411675	0.743477	0.524993	1.41617	0.156727	0.407265
ALG8	72.7384	0.686608	0.530007	1.29547	0.195158	0.489584	0.697994	0.532069	1.31185	0.189571	0.386644	0.337913	0.518854	0.651268	0.514874	0.753562
ALPP	0.327059	-2.55162	9.21383	-0.276934	0.781831		-0.649067	9.22474	-0.0703616	0.943906		-1.5038	9.01221	-0.166862	0.867479
AMACR	0.826027	-3.27095	3.13804	-1.04236	0.297247		0.273221	2.98537	0.0915199	0.92708		4.15699	2.90489	1.43103	0.152421
AMDHD2	195.151	-0.929702	0.483607	-1.92243	0.0545512	0.257179	-0.434925	0.482007	-0.902322	0.366886	0.559691	0.00618093	0.468802	0.0131845	0.989481	0.999127
AMER1	627.601	-1.40674	0.739835	-1.90143	0.0572462	0.263793	-1.58401	0.73972	-2.14137	0.0322443	0.129038	-1.02396	0.721875	-1.41848	0.156052	0.406303
AMH	1.35285	-3.56002	2.41895	-1.47172	0.141097		-3.11166	2.42313	-1.28415	0.199089		-1.94737	2.3901	-0.814766	0.415206
AMHR2	1.92366	0.492074	1.56259	0.31491	0.75283	0.912187	-1.35748	1.85155	-0.733161	0.46346		-0.702819	1.54868	-0.45382	0.649959	0.847687
AMIGO1	1.54636	-2.31427	1.69779	-1.3631	0.17285		-2.56176	1.71632	-1.49259	0.135545		-1.7562	1.4046	-1.25032	0.211182
AMIGO2	0.321459	-1.22812	9.2235	-0.133151	0.894074		0.633323	9.22474	0.0686548	0.945264		-1.50373	9.01221	-0.166855	0.867484
AMPD3	1.9527	-3.19292	1.52135	-2.09875	0.0358393	0.200903	-3.03683	1.4955	-2.03065	0.0422905		-0.889445	1.15244	-0.771794	0.440237	0.701904
AMY1A	3.06379	1.52975	0.813845	1.87966	0.060154	0.272573	0.967818	0.886807	1.09135	0.275118	0.47939	-1.72193	1.03536	-1.66312	0.0962886	0.300041
AMY2A	25.0841	1.05249	0.391129	2.69089	0.00712612	0.0707048	0.757289	0.406753	1.86179	0.0626322	0.19097	-0.104006	0.396179	-0.262524	0.792917	0.927387
AMY2B	21.3008	1.07999	0.603896	1.78838	0.0737153	0.302285	1.13396	0.608224	1.86438	0.0622684	0.190686	0.348826	0.606054	0.575569	0.564907	0.79167
AMZ2	57.9215	0.350524	0.582321	0.601944	0.547212	0.793538	0.593912	0.585546	1.01429	0.310446	0.516107	-0.262507	0.583726	-0.449709	0.652921	0.848329
ANGPTL2	13.4319	-2.47195	0.664558	-3.71969	0.000199467	0.00638	-1.63909	0.549746	-2.98155	0.00286797	0.0245345	-0.310842	0.463002	-0.671362	0.50199	0.747235
ANGPTL4	0.923325	-0.842782	2.09398	-0.402479	0.687332		1.51137	1.90296	0.79422	0.427067		-2.48075	2.13698	-1.16087	0.245695
ANK1	1.578	-3.53529	2.11272	-1.67333	0.0942617		-1.885	2.03849	-0.924703	0.355121		-0.571666	1.88233	-0.303702	0.761355
ANKRD10	1910.41	0.468114	0.134077	3.49137	0.000480552	0.0114857	0.234577	0.134065	1.74972	0.0801665	0.222124	0.445856	0.130699	3.41131	0.000646514	0.0084814
ANKRD20A13P	433.181	-0.740296	0.429544	-1.72345	0.0848075	0.329976	-0.658296	0.428544	-1.53612	0.124509	0.294952	-0.0654003	0.416831	-0.156899	0.875324	0.953614
ANKRD26	25.0566	-0.0239233	0.372035	-0.0643039	0.948728	0.984832	0.589704	0.356188	1.6556	0.0978036	0.2508	0.477673	0.339922	1.40524	0.159949	0.412588
ANKRD30A	0.233743	0	9.22474	0	1		-0.648993	9.22474	-0.0703535	0.943912		-1.21572	9.01254	-0.134893	0.892697
ANKRD36B	22.4607	-1.28936	0.529408	-2.43547	0.0148726	0.11844	-0.577999	0.506648	-1.14083	0.253941	0.461238	-0.184175	0.460493	-0.39995	0.689193	0.868479
ANKRD36BP2	1.21578	0.165646	2.56748	0.064517	0.948559		-2.73367	2.75709	-0.991506	0.321438		-2.14341	2.70151	-0.793414	0.427537
ANLN	68.7632	-0.123776	0.371541	-0.333141	0.739028	0.900496	0.896526	0.361068	2.48298	0.0130287	0.0731	1.19345	0.347466	3.43473	0.000593145	0.00796352
ANO10	135.997	-0.914704	0.373193	-2.45102	0.0142452	0.116273	-1.18615	0.372841	-3.18137	0.00146578	0.0144056	-0.926134	0.36047	-2.56924	0.0101921	0.0679997
ANP32E	1354.1	-0.281576	0.122565	-2.29736	0.0215983	0.146708	-0.893958	0.12384	-7.21865	5.25075e-13	5.04311e-11	-0.493373	0.119892	-4.11515	3.86924e-05	0.000825058
ANXA1	0.274937	0	9.22474	0	1		0	9.22474	0	1		4.30322	8.94355	0.481154	0.630407
ANXA2	109.834	-0.322465	0.274051	-1.17666	0.239331	0.547943	-1.68615	0.298118	-5.656	1.54945e-08	6.29614e-07	-1.65159	0.28829	-5.7289	1.01085e-08	5.23477e-07
ANXA2P2	34.0005	-0.0669055	0.486969	-0.137392	0.890721	0.966623	-1.30257	0.530709	-2.45439	0.0141124	0.0770532	-1.31958	0.513606	-2.56925	0.0101918	0.0679997
ANXA5	221.539	0.132582	0.44552	0.29759	0.766016	0.920489	-0.0240775	0.446994	-0.0538654	0.957042	0.983097	-0.151483	0.43719	-0.346493	0.728972	0.89511
ANXA7	63.2896	0.674314	0.354074	1.90444	0.0568523	0.263654	0.910663	0.354458	2.56917	0.0101942	0.0618976	0.921518	0.345888	2.66421	0.00771701	0.0552122
ANXA8	0.73532	0.276415	3.11359	0.0887771	0.929259		-0.975151	3.23956	-0.301014	0.763404		-1.74038	3.13964	-0.554325	0.579357
ANXA8L1	13.0894	-2.00481	0.650097	-3.08386	0.00204336	0.0326788	-1.96335	0.666088	-2.94759	0.00320266	0.0266967	-1.61656	0.531396	-3.0421	0.00234936	0.0232267
AOAH	0.370369	1.88296	3.81646	0.493378	0.621746		-0.10305	3.81788	-0.0269915	0.978467		-2.02116	3.80643	-0.530986	0.595429
AP1M2	0.653605	-0.828638	3.33187	-0.248701	0.803592		0.115277	3.23996	0.0355798	0.971617		0.806021	3.18696	0.252912	0.800336
AP2B1	8.64433	-0.0524942	0.506632	-0.103614	0.917476	0.97293	-0.224398	0.558538	-0.40176	0.687861	0.810887	0.263823	0.524618	0.502887	0.615044	0.827779
AP2M1	46.4164	-0.78281	0.588069	-1.33115	0.183139	0.483977	-0.0346404	0.58157	-0.0595636	0.952503	0.980183	-0.38598	0.564583	-0.683655	0.494193	0.741801
AP3M1	1621.54	0.465339	0.10449	4.45341	8.45167e-06	0.000437676	0.110516	0.104681	1.05574	0.291087	0.497627	0.154545	0.102181	1.51246	0.130417	0.363196
APBA1	4.15454	-0.567042	1.07336	-0.528288	0.5973	0.830113	0.179894	0.909887	0.19771	0.843272	0.915639	-2.32019	1.1342	-2.04566	0.0407901	0.173467
APBB2	19.3392	-0.695518	0.49949	-1.39246	0.163784	0.461698	-0.299662	0.483171	-0.620199	0.535127	0.70638	-0.119591	0.476474	-0.250991	0.801821	0.928345
APEX1	720.868	0.197873	0.21927	0.902419	0.366834	0.680362	0.0722043	0.219794	0.328509	0.742527	0.852232	-0.0127873	0.214895	-0.0595052	0.95255	0.985437
APLN	0.339657	-2.36045	9.21583	-0.25613	0.797851		-1.22149	9.2239	-0.132427	0.894647		-2.3159	9.00738	-0.257111	0.797093
APLP1	630.228	-1.16359	0.527458	-2.20604	0.0273814	0.168068	-1.49104	0.527557	-2.82631	0.00470877	0.0354079	-1.22664	0.514894	-2.38232	0.017204	0.0963264
APOA1	0.955797	0.445719	2.38248	0.187082	0.851596		-1.30423	2.61376	-0.498987	0.617788		1.5312	2.32186	0.659473	0.509592
APOBEC3G	0.0839017	0	9.22474	0	1		0	9.22474	0	1		-1.44833	9.01227	-0.160707	0.872325
APOC1	1.60858	1.15593	1.29479	0.892759	0.371986		-2.17515	1.68691	-1.28943	0.197249		-3.17216	1.67186	-1.89738	0.0577779
APOE	1.68495	0.645359	1.14852	0.561907	0.57418		-0.328341	1.17814	-0.278696	0.780478		-2.27938	1.52627	-1.49344	0.135323
APOL3	0.334561	0	6.01828	0	1		-0.976086	6.0181	-0.162192	0.871155		0.454568	5.83118	0.0779548	0.937864
APP	1124.6	0.348988	0.165762	2.10535	0.0352608	0.198684	0.257992	0.165318	1.56059	0.118621	0.287769	0.236694	0.161194	1.46838	0.142002	0.384147
APPBP2	464.775	0.364491	0.190104	1.91733	0.0551964	0.258733	0.0154914	0.190718	0.0812264	0.935262	0.96968	0.113887	0.18639	0.611015	0.541189	0.773382
APTX	176.692	0.229952	0.281347	0.817325	0.413743	0.706818	0.57326	0.280698	2.04227	0.041125	0.149856	0.612396	0.27456	2.23046	0.0257166	0.125694
AQP1	2.25352	0.0880632	1.518	0.0580125	0.953739	0.987331	-4.16288	1.73341	-2.40156	0.0163255		0.275348	1.34782	0.20429	0.838127	0.939168
AQP3	0.391587	-1.22333	4.96216	-0.246531	0.805272		1.3866	4.89898	0.283037	0.777148		1.81047	4.7377	0.382142	0.702356
AQP4	0.196898	-2.8354	9.2113	-0.307817	0.758221		0	9.22474	0	1		0	9.01264	0	1
AQP9	0.171179	0	9.22474	0	1		-1.06416	9.21682	-0.115458	0.908082		-0.683896	9.01264	-0.0758819	0.939513
AR	35.3628	-0.683259	0.647823	-1.0547	0.291563	0.613297	-1.29617	0.653247	-1.98419	0.0472346	0.16333	-0.99693	0.63163	-1.57834	0.114487	0.333792
AREG	0.311087	-2.50567	7.70507	-0.325198	0.745032		-0.42112	7.71583	-0.0545788	0.956474		1.44451	7.49698	0.192679	0.847211
ARF4	132.252	0.212881	0.504375	0.422069	0.672974	0.870743	0.336405	0.50714	0.663338	0.507114	0.683373	-0.00504564	0.498617	-0.0101193	0.991926	0.999999
ARFIP2	74.2979	0.311946	0.23575	1.32321	0.185767	0.483977	0.126637	0.240436	0.526699	0.598403	0.755332	0.243417	0.238196	1.02192	0.306821	0.587084
ARHGAP1	10.9969	0.193365	0.484194	0.399355	0.689632	0.880492	0.597841	0.494445	1.20911	0.226619	0.429073	0.769008	0.469944	1.63638	0.101759	0.309548
ARHGAP15	0.0305826	0	9.22474	0	1		0	9.22474	0	1		-0.683896	9.01264	-0.0758819	0.939513
ARHGAP45	0.0914592	-0.507984	9.22474	-0.0550676	0.956085		0	9.22474	0	1		-1.21576	9.01254	-0.134897	0.892693
ARHGAP8	45.2007	2.56575	0.72259	3.55077	0.000384104	0.0100654	5.1761	0.718485	7.20419	5.83906e-13	5.36432e-11	4.40872	0.699751	6.30041	2.96861e-10	1.95658e-08
ARHGAP9	43.1418	0.899153	0.285631	3.14795	0.0016442	0.0277997	0.933832	0.274361	3.40366	0.000664897	0.00802577	0.280744	0.291875	0.961865	0.336117	0.613816
ARHGEF12	1046.91	0.211193	0.162188	1.30215	0.192865	0.487768	0.00241364	0.161822	0.0149154	0.9881	0.996205	0.443954	0.157489	2.81896	0.00481798	0.0401959
ARHGEF2	169.133	-0.609803	0.218589	-2.78972	0.00527531	0.0582023	-1.0995	0.220335	-4.99011	6.03448e-07	1.82155e-05	-0.0780395	0.207701	-0.37573	0.707118	0.879334
ARHGEF9	201.283	-0.202884	0.248223	-0.817346	0.413731	0.706818	-0.470798	0.247862	-1.89944	0.0575068	0.180686	-0.505402	0.241509	-2.09268	0.0363775	0.160815
ARID4B	335.435	0.6798	0.309324	2.1977	0.0279708	0.170411	0.338098	0.309586	1.0921	0.27479	0.47939	0.51231	0.301494	1.69924	0.0892747	0.290575
ARID5B	2.69576	-2.14144	1.27853	-1.67492	0.093949	0.350496	-1.28009	1.13693	-1.12592	0.260198	0.466326	-0.934718	1.18301	-0.790118	0.429459	0.690882
ARIH1	33.8302	-0.24411	0.498273	-0.489913	0.624196	0.845346	0.0448747	0.494105	0.0908202	0.927635	0.964613	0.111091	0.485039	0.229036	0.818841	0.93404
ARIH2	268.208	0.281039	0.214429	1.31064	0.189979	0.485117	0.370093	0.214267	1.72725	0.0841222	0.228179	0.572399	0.208587	2.74417	0.00606643	0.0479799
ARL1	69.9115	0.0421181	0.467583	0.0900763	0.928227	0.978146	0.0951147	0.475006	0.200239	0.841294	0.914781	-0.22003	0.467547	-0.470605	0.637923	0.844019
ARL14	0.0805854	0	9.22474	0	1		0	9.22474	0	1		-0.683896	9.01264	-0.0758819	0.939513
ARL4C	0.577905	-2.80378	4.55195	-0.615951	0.537927		-0.649081	4.57867	-0.141762	0.887268		-0.946184	4.4734	-0.211513	0.832487
ARL4D	14.1486	-2.94231	0.927442	-3.1725	0.00151131	0.0258826	0.389992	0.767957	0.50783	0.611572	0.765662	-0.929139	0.774663	-1.19941	0.230368	0.50765
ARNT	211.746	0.101965	0.229827	0.44366	0.657288	0.866466	-0.0189286	0.229737	-0.0823926	0.934335	0.969194	0.275489	0.22565	1.22087	0.222135	0.495025
ARNT2	18.523	-0.232588	0.495264	-0.469625	0.638623	0.853946	-0.0512609	0.492583	-0.104066	0.917117	0.958392	-0.293173	0.492685	-0.595052	0.551809	0.780185
ARPC3	1245.97	0.369075	0.497422	0.741976	0.458102	0.740108	0.482615	0.49758	0.969923	0.332085	0.533148	-0.20359	0.486236	-0.418707	0.67543	0.863612
ARPP19	112.581	0.386879	0.38397	1.00757	0.313659	0.637432	0.757609	0.385639	1.96456	0.0494656	0.16797	0.0706714	0.382112	0.184949	0.853269	0.94531
ARR3	0.135059	-0.828654	9.22474	-0.0898296	0.928423		0	9.22474	0	1		-0.9462	9.01264	-0.104986	0.916387
ARRDC4	81.4677	-1.22378	0.244876	-4.99754	5.8065e-07	3.82701e-05	-1.92952	0.259552	-7.43404	1.05329e-13	1.1128e-11	-1.9338	0.251311	-7.69484	1.41672e-14	1.71186e-12
ARSE	0.139094	0	9.22474	0	1		0	9.22474	0	1		0	9.01264	0	1
ARSG	116.3	-0.447658	0.321621	-1.39188	0.163958	0.461698	0.216527	0.311978	0.694047	0.487652	0.666932	0.511818	0.301475	1.69771	0.0895627	0.290575
ASAH1	50.7037	-0.0625435	0.390185	-0.160292	0.872651	0.964929	-0.0661799	0.394014	-0.167963	0.866612	0.928412	0.324957	0.375654	0.865041	0.387016	0.657112
ASB3	59.5491	0.562999	0.367948	1.53011	0.12599	0.403577	0.341532	0.376323	0.907549	0.364117	0.558119	0.23121	0.366034	0.631662	0.527608	0.760973
ASB5	0.395997	-0.507951	8.69275	-0.0584339	0.953403		-0.648996	8.69275	-0.0746595	0.940486		-0.403118	8.45256	-0.0476918	0.961962
ASCC3	290.44	0.172306	0.185614	0.928303	0.35325	0.672195	1.3904	0.181467	7.66201	1.83046e-14	2.41735e-12	2.31264	0.175779	13.1565	1.56138e-39	5.65999e-37
ASCL1	0.676673	-0.508061	3.23501	-0.157051	0.875205		-0.975168	3.23469	-0.301472	0.763054		3.0336	2.97443	1.01989	0.307781
ASF1A	381.433	0.549852	0.323114	1.70173	0.0888066	0.338867	0.657001	0.323433	2.03133	0.0422213	0.151521	0.0817536	0.315993	0.25872	0.795852	0.927387
ASF1B	251.435	-0.505954	0.435121	-1.16279	0.244915	0.553551	-0.305038	0.434289	-0.702384	0.48244	0.661515	0.900798	0.421553	2.13686	0.0326096	0.148381
ASGR1	6.13913	0.963214	0.766305	1.25696	0.208768	0.508575	0.927381	0.772029	1.20123	0.229664	0.432899	0.142515	0.76107	0.187256	0.85146	0.944321
ASNS	553.969	0.868477	0.357944	2.42629	0.0152541	0.119772	1.20243	0.35824	3.35649	0.000789377	0.00891954	-0.0668369	0.350826	-0.190513	0.848907	0.943338
ASPM	2.97084	0.573559	1.15731	0.495597	0.620179	0.84457	-0.166302	1.19405	-0.139276	0.889232	0.939474	3.38994	1.17877	2.87583	0.00402965	0.0350579
ASPN	0.597993	3.11185	8.1041	0.383985	0.70099		-1.62567	8.16223	-0.199169	0.84213		0	7.97803	0	1
ASS1	35.7369	-0.445722	0.375916	-1.18569	0.235743	0.544715	-0.536095	0.380049	-1.41059	0.158364	0.345686	0.868528	0.342147	2.53846	0.0111341	0.072505
ASTN2	0.481903	-0.508047	3.60427	-0.140957	0.887904		2.75434	3.47144	0.793429	0.427528		0.153994	3.344	0.0460507	0.96327
ATAD2	9.92648	-0.440771	0.599523	-0.735203	0.462216	0.743495	0.490789	0.61481	0.798277	0.42471	0.615877	0.870949	0.554482	1.57075	0.116242	0.336652
ATAD5	10.7893	-0.108808	0.622803	-0.174707	0.86131	0.958725	1.19352	0.600654	1.98703	0.0469186	0.162523	0.639381	0.574304	1.11331	0.265574	0.545431
ATF1	17.7541	-0.346889	0.491586	-0.705652	0.480404	0.754105	0.503784	0.447957	1.12462	0.260748	0.466916	0.829844	0.406906	2.0394	0.0414101	0.175228
ATF3	1.41559	-2.44174	1.75647	-1.39015	0.164485		2.74637	1.33517	2.05695	0.0396913		2.37328	1.41972	1.67165	0.0945927
ATF4	2377.75	0.570657	0.216648	2.63403	0.00843779	0.0797921	1.0923	0.216534	5.04447	4.5477e-07	1.41313e-05	0.733632	0.211453	3.46948	0.00052146	0.0070886
ATF5	761.563	-0.439017	0.47549	-0.923292	0.355855	0.672859	-0.608088	0.47542	-1.27905	0.200878	0.40043	-0.159446	0.463387	-0.344088	0.73078	0.895968
ATF6	99.941	0.0121907	0.31083	0.0392199	0.968715	0.989936	0.320827	0.310426	1.03351	0.301367	0.507401	0.2912	0.303989	0.957931	0.338098	0.616398
ATF6B	31.9874	-0.574169	0.430619	-1.33336	0.182415	0.483977	-0.862159	0.441218	-1.95404	0.050696	0.169029	-0.421633	0.420969	-1.00158	0.316548	0.595891
ATG12	34.5106	0.545242	0.280795	1.94178	0.0521637	0.250912	0.813887	0.285804	2.84771	0.00440353	0.0335909	0.710267	0.289518	2.45328	0.0141562	0.0843553
ATG3	100.441	0.00916498	0.508021	0.0180406	0.985606	0.994543	0.46365	0.508938	0.911015	0.362287	0.557142	0.130866	0.500167	0.261646	0.793595	0.927387
ATG4C	83.8124	0.322959	0.244522	1.32078	0.186576	0.483977	0.710263	0.244239	2.90806	0.00363674	0.0293299	0.383104	0.237419	1.61362	0.106609	0.318986
ATIC	291.51	-0.0958814	0.226846	-0.422672	0.672534	0.870743	0.117054	0.22639	0.517046	0.605124	0.761541	0.510464	0.220162	2.31858	0.0204177	0.107759
ATM	237.479	0.094266	0.257607	0.36593	0.714417	0.890913	0.451048	0.254188	1.77447	0.075986	0.216095	0.0687073	0.24564	0.279707	0.779702	0.922662
ATMIN	305.265	0.519747	0.17907	2.90249	0.00370213	0.0482164	0.234527	0.179445	1.30696	0.191226	0.388894	0.370384	0.172716	2.14447	0.0319949	0.146195
ATP11B	225.507	-0.612838	0.207103	-2.9591	0.00308539	0.0424729	-0.606246	0.205719	-2.94696	0.00320916	0.0266967	-0.165782	0.194822	-0.850942	0.394802	0.665139
ATP11C	900.31	0.340644	0.135629	2.51158	0.0120192	0.103737	0.185095	0.135636	1.36465	0.172364	0.363842	0.222434	0.131267	1.69451	0.0901689	0.290975
ATP12A	0.0603348	0	9.22474	0	1		0	9.22474	0	1		-0.683896	9.01264	-0.0758819	0.939513
ATP1A1	149.433	-0.543801	0.227681	-2.38843	0.0169204	0.126903	-0.1051	0.222282	-0.472823	0.636339	0.780375	0.080791	0.219495	0.368077	0.712816	0.883404
ATP1A2	1.0938	-2.72961	2.05704	-1.32696	0.184522		-2.01022	2.10503	-0.954957	0.339599		-1.97952	2.04274	-0.969052	0.332519
ATP1B1	319.823	-0.440491	0.145989	-3.01728	0.00255056	0.0375286	-0.646105	0.146642	-4.406	1.05295e-05	0.000239236	-0.748469	0.14276	-5.24286	1.58106e-07	5.54646e-06
ATP2C1	691.848	0.144794	0.143791	1.00698	0.313946	0.637432	0.350316	0.142968	2.45031	0.0142735	0.077234	0.488376	0.138929	3.5153	0.000439259	0.00628544
ATP5B	9857.4	-0.0187934	0.169796	-0.110683	0.911868	0.97108	-0.0356447	0.169786	-0.209939	0.833715	0.910408	0.186433	0.165816	1.12434	0.260869	0.542856
ATP5C1	8448.31	-0.324429	0.294627	-1.10115	0.270832	0.58622	-0.317943	0.294644	-1.07907	0.280555	0.484721	-0.117887	0.287807	-0.409605	0.682096	0.864545
ATP5J	6.1223	0.790597	0.588371	1.34371	0.179043	0.480172	0.490427	0.649143	0.755499	0.449949	0.636525	-0.325591	0.654433	-0.497517	0.618824	0.82898
ATP5S	15.5664	-0.712457	0.508157	-1.40204	0.160903	0.458069	0.0691904	0.504099	0.137256	0.890829	0.94022	-0.779629	0.531998	-1.46548	0.142791	0.385324
ATP6AP1	121.653	0.174005	0.3028	0.574654	0.565525	0.807628	-0.245737	0.305091	-0.805452	0.420559	0.612433	0.350087	0.297177	1.17804	0.238779	0.513694
ATP6V0A4	0.290796	0	8.97129	0	1		-0.328515	8.97129	-0.0366185	0.970789		0.770507	8.70063	0.0885576	0.929434
ATP6V0B	54.7164	-0.29955	0.359999	-0.832085	0.405361	0.70517	1.08518	0.35567	3.05108	0.0022802	0.0204479	0.461267	0.339172	1.35998	0.173837	0.433595
ATP6V0E1	2145.05	-0.0312432	0.175205	-0.178323	0.858469	0.957077	0.168989	0.175129	0.96494	0.334575	0.535573	0.139513	0.170848	0.81659	0.414163	0.677296
ATP6V1B1	1.44755	-2.45335	1.96273	-1.24996	0.211313		-2.41574	1.9255	-1.2546	0.209622		0.260499	1.5826	0.164602	0.869257
ATP6V1B2	1648.41	-0.543489	0.380039	-1.43009	0.152692	0.444584	-0.74252	0.380113	-1.95342	0.0507699	0.169029	-0.56536	0.371091	-1.52351	0.127631	0.358654
ATP6V1D	472.393	0.380726	0.360646	1.05568	0.291116	0.613297	0.504943	0.360919	1.39905	0.161799	0.349929	-0.0614319	0.352366	-0.174341	0.861597	0.94842
ATP6V1F	1298.97	0.137739	0.120675	1.1414	0.253704	0.562493	0.259768	0.120876	2.14904	0.0316314	0.127309	-0.0569701	0.117927	-0.483097	0.629027	0.835461
ATRAID	928.623	0.308695	0.259968	1.18744	0.235056	0.54388	0.67973	0.259885	2.6155	0.00890958	0.0561968	0.377429	0.253481	1.48898	0.136492	0.372953
ATRX	61.6597	-0.182461	0.411862	-0.443014	0.657755	0.866466	0.386472	0.413243	0.935216	0.349677	0.550162	0.148774	0.403103	0.369073	0.712073	0.882987
AURKA	28.354	0.767258	0.393272	1.95096	0.0510616	0.248454	0.546871	0.40019	1.36653	0.171773	0.36332	0.299531	0.388325	0.77134	0.440505	0.701904
AURKB	59.4429	-0.436011	0.3146	-1.38592	0.165771	0.464397	0.757206	0.301365	2.51259	0.0119849	0.0696518	1.15497	0.297296	3.88491	0.000102368	0.00187101
AVP	0.439921	3.59774	9.1642	0.392586	0.694625		0	9.22474	0	1		-1.20244	9.01255	-0.133418	0.893863
AXIN1	1.69884	0.56702	1.23898	0.457649	0.647204		-0.432245	1.23357	-0.3504	0.726038		1.63246	1.23466	1.3222	0.186102
AXL	1.46872	-3.89533	1.76304	-2.20944	0.0271443		-2.55415	1.7957	-1.42237	0.154919		-3.21826	1.75609	-1.83263	0.0668572
B2M	379.389	-0.0672918	0.587702	-0.1145	0.908842	0.97108	-1.1185	0.591881	-1.88974	0.0587926	0.183228	-1.37809	0.577246	-2.38736	0.01697	0.0956213
B3GALT6	649.895	-1.91073	0.680717	-2.80693	0.00500155	0.056617	-1.654	0.680336	-2.43116	0.0150508	0.0799052	-1.1875	0.664344	-1.78747	0.0738614	0.26037
B3GAT1	35.051	-0.146049	0.312855	-0.466828	0.640623	0.855869	0.350778	0.293026	1.19709	0.231273	0.434381	0.124028	0.274464	0.451892	0.651347	0.848108
B3GNT2	0.611019	1.41188	3.5651	0.396028	0.692085		2.01846	3.582	0.5635	0.573094		-2.18044	3.61222	-0.603628	0.546091
B4GALT1	0.79053	-2.98764	2.4323	-1.22832	0.219327		-1.35142	2.50102	-0.54035	0.588956		1.83299	2.15743	0.849616	0.395539
B4GALT2	2.79869	-1.80473	1.24284	-1.4521	0.146473	0.435217	-1.3369	1.23827	-1.07965	0.280297	0.484721	-0.878653	0.998913	-0.879609	0.379071	0.651248
B4GALT5	6.58803	0.60321	0.621043	0.971286	0.331406	0.650119	-0.6515	0.729232	-0.893406	0.37164	0.562921	-0.0229681	0.618627	-0.0371276	0.970383	0.989955
B4GAT1	2.52445	-1.74777	1.37762	-1.26868	0.204554	0.50406	-0.889737	1.38771	-0.641155	0.521422	0.69365	-0.780166	1.15937	-0.672921	0.500998	0.746861
BAAT	15.5623	0.950542	0.379866	2.50231	0.0123386	0.104999	-0.440567	0.420122	-1.04866	0.294333	0.501487	-0.0369935	0.359266	-0.10297	0.917987	0.970302
BACE2	0.440478	0.704025	7.50829	0.0937662	0.925295		0.633334	7.55648	0.0838134	0.933205		0.564264	7.37286	0.0765326	0.938995
BAD	10.8985	-1.06045	0.490025	-2.16407	0.0304593	0.180025	-2.24675	0.647794	-3.4683	0.000523753	0.00661834	-0.805915	0.454133	-1.77462	0.0759599	0.264341
BAG3	63.6516	0.385452	0.317971	1.21222	0.225428	0.531784	0.467569	0.315701	1.48105	0.138593	0.316934	0.788099	0.310443	2.53863	0.0111288	0.072505
BAK1	1.47244	-2.81651	1.81573	-1.55117	0.120862		-0.71611	1.52693	-0.468987	0.639079		-1.78169	1.82029	-0.978792	0.327683
BAMBI	1.98594	0.308544	1.30727	0.236021	0.813416	0.942243	1.80542	1.09601	1.64726	0.0995042		1.28356	1.15018	1.11597	0.264437	0.545431
BANF1	285.8	0.372082	0.491737	0.756668	0.449249	0.735027	1.22616	0.491942	2.49249	0.0126851	0.0723318	0.416224	0.480951	0.86542	0.386809	0.657112
BAX	2187.74	0.000990117	0.0891184	0.0111101	0.991136	0.995254	0.698406	0.0881711	7.92103	2.35556e-15	3.82869e-13	1.34053	0.0856866	15.6446	3.61876e-55	3.9354e-52
BBC3	147.507	0.19337	0.293742	0.658298	0.510347	0.770836	0.973743	0.288574	3.37433	0.000739959	0.00863831	1.16466	0.283761	4.10438	4.05409e-05	0.000856082
BBOX1	0.166445	0.453673	9.22474	0.04918	0.960776		-1.41377	9.22313	-0.153285	0.878174		-0.683896	9.01264	-0.0758819	0.939513
BBS10	17.4917	-0.41389	0.534441	-0.774436	0.438673	0.726667	0.103426	0.539648	0.191655	0.848012	0.918427	-0.117102	0.521528	-0.224536	0.82234	0.935945
BCAS2	480.478	0.309607	0.448906	0.689693	0.490387	0.761381	0.45682	0.449301	1.01673	0.30928	0.51498	-0.249664	0.439595	-0.567942	0.570074	0.794815
BCAT1	2204.5	0.472339	0.391567	1.20628	0.227711	0.536588	0.591739	0.391609	1.51105	0.130776	0.305001	0.322006	0.382622	0.841577	0.400025	0.669272
BCAT2	5.58276	-0.809264	0.746227	-1.08447	0.278155	0.59546	-0.262294	0.657431	-0.398968	0.689917	0.810887	0.34533	0.66622	0.518342	0.60422	0.820336
BCL2	21.4712	-4.16532	0.971932	-4.28561	1.82238e-05	0.000808913	-1.81897	0.73674	-2.46895	0.0135511	0.0751839	-1.1903	0.676037	-1.76071	0.078288	0.268575
BCL2A1	0.40423	-1.40904	9.22263	-0.152781	0.878571		0	9.22474	0	1		2.29943	8.95418	0.256799	0.797334
BCL2L1	2450.84	-0.115329	0.161275	-0.71511	0.474541	0.752279	0.025006	0.160935	0.155379	0.876522	0.930704	0.493152	0.156976	3.14157	0.00168045	0.018184
BCL2L11	435.398	-0.279612	0.269426	-1.03781	0.29936	0.620694	0.000639471	0.267943	0.00238659	0.998096	0.998777	0.322619	0.261205	1.23512	0.216785	0.489433
BCL2L13	536.59	-0.461168	0.223367	-2.06462	0.0389593	0.209226	-0.257237	0.223082	-1.15311	0.248867	0.455682	-0.310083	0.216741	-1.43066	0.152527	0.401145
BCL2L2	51.2156	-0.650512	0.390202	-1.66712	0.0954915	0.354427	-0.629714	0.385295	-1.63437	0.102182	0.258885	-0.461624	0.379446	-1.21658	0.223766	0.498148
BCL3	9.3297	-3.60409	1.28291	-2.80931	0.00496476	0.056617	-2.28475	0.965219	-2.36708	0.0179289	0.0897722	-0.90897	0.816748	-1.11291	0.265745	0.545431
BCL7B	118.899	-0.476852	0.464007	-1.02768	0.3041	0.625157	-0.677413	0.464109	-1.4596	0.1444	0.325285	-0.448437	0.449357	-0.997953	0.318302	0.596816
BDH1	1.94305	-0.394253	1.45622	-0.270738	0.786593	0.926782	-1.10928	1.66171	-0.667555	0.504418		-1.22623	1.62554	-0.754353	0.450637	0.710244
BDNF	3.19538	-0.0999129	1.18942	-0.0840017	0.933055	0.979438	2.83861	1.15969	2.44772	0.0143762	0.077492	-0.321996	1.18883	-0.270851	0.786506	0.925187
BECN1	73.9183	-0.481217	0.456142	-1.05497	0.291438	0.613297	0.228632	0.454355	0.503201	0.614823	0.767639	0.209397	0.442541	0.47317	0.636092	0.84257
BEX3	2341.52	-0.0877559	0.268813	-0.326456	0.744079	0.904118	-0.553914	0.26922	-2.05748	0.0396402	0.146983	-0.393487	0.262645	-1.49817	0.134089	0.369169
BHLHE40	0.424479	0.774321	6.4538	0.119979	0.9045		-0.829624	6.44653	-0.128693	0.8976		0	6.30542	0	1
BID	487.198	0.292926	0.109585	2.67306	0.00751635	0.0733097	0.294299	0.109202	2.69498	0.00703921	0.0479644	0.330803	0.106011	3.12045	0.00180573	0.0194428
BIN2	0.211422	0	9.22474	0	1		0	9.22474	0	1		-0.247577	8.95548	-0.0276453	0.977945
BIRC2	62.4961	-0.197135	0.266476	-0.739786	0.45943	0.741291	-0.0259558	0.265967	-0.0975904	0.922258	0.961615	0.0383188	0.25188	0.152131	0.879083	0.954095
BIRC3	0.193386	1.78899	9.20155	0.194423	0.845845		2.92262	9.1764	0.318493	0.750111		0	9.01264	0	1
BIRC5	20.2576	0.207159	0.564845	0.366753	0.713803	0.890913	-0.0920257	0.594422	-0.154815	0.876967	0.930704	0.705981	0.524284	1.34656	0.178122	0.439745
BIRC6	199.725	0.244406	0.314789	0.776411	0.437506	0.725708	0.362025	0.314888	1.14969	0.25027	0.456874	0.703548	0.306184	2.29779	0.0215735	0.110666
BLCAP	5.37582	-0.749084	0.905073	-0.827651	0.407868	0.70517	0.395514	0.866008	0.45671	0.64788	0.786435	0.597486	0.829338	0.720437	0.471256	0.725453
BLMH	18.6025	-0.316482	0.54596	-0.579681	0.56213	0.804364	-0.252547	0.578377	-0.436647	0.662367	0.795217	-0.113546	0.546967	-0.207593	0.835547	0.938242
BLNK	0.156887	-0.508062	9.22474	-0.0550761	0.956078		-0.649108	9.22474	-0.070366	0.943902		0	9.01264	0	1
BLOC1S2	190.353	0.0454523	0.502106	0.0905233	0.927871	0.978146	0.633627	0.503808	1.25767	0.20851	0.409443	0.4043	0.492049	0.821667	0.411266	0.67663
BLVRA	22.1946	-0.651118	0.454861	-1.43147	0.152297	0.444281	-1.44077	0.51246	-2.81148	0.00493147	0.0363073	-0.246211	0.467311	-0.526867	0.598286	0.815019
BLVRB	1.73181	0.287868	1.75075	0.164425	0.869396		0.766501	1.61293	0.475223	0.634628		-0.48073	1.66589	-0.288573	0.772908
BMF	179.477	-0.98465	0.185428	-5.31015	1.09533e-07	8.82352e-06	-1.84823	0.192966	-9.57796	9.89763e-22	2.61421e-19	-1.35785	0.184159	-7.37325	1.66513e-13	1.7246e-11
BMP15	0.115473	0.133122	9.22474	0.014431	0.988486		0	9.22474	0	1		-0.254067	9.01254	-0.0281904	0.97751
BMP4	1.5576	-3.65937	1.98886	-1.83994	0.0657775		0.260506	1.68643	0.154472	0.877238		0.0021527	1.6409	0.0013119	0.998953
BMP5	0.473196	0.0427844	4.5115	0.0094834	0.992433		2.11829	4.45119	0.475892	0.634151		1.3123	4.40337	0.298021	0.765687
BMP6	0.378383	0	5.39728	0	1		-0.975994	5.39708	-0.180837	0.856495		0.159649	5.21732	0.0305997	0.975589
BNC2	0.385752	-1.71031	7.57301	-0.225843	0.821324		-2.65829	7.56093	-0.351582	0.725152		-0.946204	7.40376	-0.1278	0.898307
BNIP3	0.919956	-2.79232	3.10442	-0.899469	0.368403		3.14986	2.96078	1.06386	0.287392		0.467032	2.85057	0.163838	0.869859
BNIP3L	118.029	0.121919	0.392724	0.310444	0.756223	0.914786	0.727382	0.394471	1.84394	0.0651914	0.195988	0.448962	0.387611	1.15828	0.24675	0.522064
BOD1	1.72986	-0.569178	1.21125	-0.469911	0.638418		0.337636	1.11794	0.302015	0.762641		-0.100291	1.33798	-0.0749568	0.940249
BPHL	1149.64	0.098966	0.128919	0.767658	0.44269	0.730159	-0.374983	0.129898	-2.88675	0.00389245	0.0309201	-0.503763	0.126716	-3.97553	7.0224e-05	0.00142128
BPIFA1	0
BPIFA2	0.104998	-0.828654	9.22474	-0.0898296	0.928423		0	9.22474	0	1		-0.683896	9.01264	-0.0758819	0.939513
BPIFB1	0.16139	0	9.22474	0	1		-0.649108	9.22474	-0.070366	0.943902		1.20582	8.95641	0.134632	0.892903
BRCA1	3.92981	0.331999	0.89072	0.372731	0.709349	0.890288	0.29253	0.997326	0.293314	0.769282	0.869713	1.52791	0.836964	1.82554	0.0679196	0.246166
BRD2	99.0424	0.765637	0.507683	1.5081	0.131529	0.414602	1.6497	0.507749	3.24904	0.00115795	0.0120529	0.745207	0.496851	1.49986	0.133651	0.368886
BRD3	274.14	-0.0478217	0.259602	-0.184211	0.853848	0.954444	-0.278183	0.259134	-1.07351	0.283044	0.487931	0.0136807	0.250971	0.0545112	0.956528	0.985626
BRE-AS1	0.546374	-2.48399	3.40473	-0.72957	0.465653		1.69223	3.31646	0.510253	0.609874		1.72254	3.16596	0.54408	0.586386
BRIP1	18.6802	0.0584719	0.534173	0.109462	0.912836	0.97108	1.2526	0.511298	2.44985	0.0142918	0.077234	1.51656	0.493672	3.07199	0.00212635	0.0215108
BRMS1L	786.498	0.181391	0.23004	0.788521	0.430392	0.719092	-0.135158	0.230291	-0.586901	0.55727	0.720152	0.195754	0.223966	0.874033	0.3821	0.652857
BRPF3	8.67017	0.0211248	0.755599	0.0279577	0.977696	0.994151	0.192883	0.743955	0.259267	0.79543	0.886468	0.738876	0.714523	1.03408	0.301097	0.583158
BSCL2	562.889	-0.179542	0.218868	-0.820321	0.412033	0.706767	-0.485214	0.219725	-2.20828	0.0272245	0.116213	-0.182944	0.213099	-0.858495	0.390619	0.66182
BTG2	171.164	-0.584635	0.200811	-2.91137	0.00359842	0.047221	0.545639	0.195232	2.79482	0.00519288	0.0377063	0.398635	0.192974	2.06575	0.0388521	0.168978
BTG3	138.402	-0.543854	0.398474	-1.36484	0.172303	0.472835	0.913588	0.391598	2.33297	0.0196497	0.0943343	0.509598	0.38054	1.33914	0.180524	0.444665
BTK	5.97481	-1.02635	0.833992	-1.23065	0.218454	0.525014	-0.760701	0.81051	-0.938546	0.347964	0.549056	-0.626194	0.757684	-0.826459	0.408544	0.673573
BTN3A2	15.7172	0.0689328	0.460776	0.149602	0.881079	0.965374	0.221793	0.458145	0.484111	0.628307	0.775475	0.119658	0.442642	0.270327	0.786909	0.925187
BTN3A3	0.281825	0	9.22474	0	1		0	9.22474	0	1		0.562448	9.00459	0.0624624	0.950195
BUB1	12.39	0.609649	0.698217	0.873152	0.38258	0.689405	0.0144598	0.713692	0.0202605	0.983836	0.995404	0.618425	0.618011	1.00067	0.316987	0.595891
BUB1B	8.364	0.19329	0.842082	0.229539	0.81845	0.943041	0.972102	0.771024	1.26079	0.207383	0.408769	0.120963	0.72638	0.166529	0.867741	0.950799
BZW1	5014.14	0.303724	0.0914147	3.32248	0.000892204	0.0168743	0.0956473	0.0915195	1.0451	0.295975	0.503134	0.0903864	0.089329	1.01184	0.311616	0.589873
BZW2	163.156	0.126113	0.412144	0.305992	0.759611	0.917405	0.523369	0.412161	1.26982	0.20415	0.405804	0.249702	0.400868	0.622903	0.533348	0.76671
C15orf48	1.29836	-0.203762	1.65091	-0.123424	0.901771		-2.0144	1.97104	-1.022	0.306782		-0.724315	1.74647	-0.414731	0.678339
C16orf72	214.635	0.823964	0.346373	2.37883	0.0173676	0.128794	0.832523	0.347234	2.39758	0.0165037	0.0850545	0.700809	0.337807	2.07459	0.0380249	0.166073
C1D	27.7777	0.230176	0.503168	0.457454	0.647344	0.861178	0.876275	0.496618	1.76448	0.0776506	0.219079	-0.000174912	0.482139	-0.000362784	0.999711	0.999999
C1orf112	185.848	0.440611	0.180224	2.44479	0.0144936	0.117625	0.601882	0.176879	3.4028	0.000666995	0.00802577	0.46212	0.172241	2.68298	0.0072969	0.0529025
C1orf131	180.246	0.102668	0.258814	0.396688	0.691597	0.882243	0.115696	0.259443	0.44594	0.655641	0.789834	-0.0726106	0.253613	-0.286305	0.774645	0.919177
C1orf162	4.55847	-1.81464	0.92903	-1.95326	0.0507887	0.24768	-0.632397	0.879892	-0.718721	0.472313	0.655285	1.27573	0.784713	1.62573	0.104007	0.315064
C1orf194	0.139842	-0.508062	9.22474	-0.0550761	0.956078		-0.9763	9.22462	-0.105836	0.915712		-1.21585	9.01254	-0.134906	0.892686
C1QA	0.0347283	0	9.22474	0	1		-0.328516	9.22474	-0.0356125	0.971591		1.76917	8.98269	0.196954	0.843864
C1QB	2.14788	-0.0997751	1.20919	-0.0825137	0.934238	0.979766	0.255458	1.1474	0.22264	0.823816		0.829882	1.08123	0.767538	0.442762	0.704983
C1QBP	1354.71	0.0517866	0.128818	0.402013	0.687674	0.879301	0.262333	0.128948	2.03441	0.0419099	0.151362	0.182995	0.125446	1.45876	0.144632	0.387923
C1QC	0.34727	-0.153726	8.75181	-0.0175651	0.985986		0	8.80145	0	1		0.776616	8.57485	0.090569	0.927835
C1R	1.13529	-0.74541	2.2916	-0.325279	0.74497		-1.74978	2.45611	-0.712419	0.476205		0.927528	2.34597	0.39537	0.69257
C1RL	0.366908	-2.04779	9.21849	-0.222139	0.824206		0.764301	9.16341	0.0834079	0.933527		1.89414	8.97157	0.211127	0.832788
C1S	32.5668	2.17038	0.475188	4.56741	4.9378e-06	0.000261944	1.77405	0.464824	3.8166	0.000135306	0.00221629	1.04838	0.44331	2.36488	0.0180357	0.0988102
C20orf85	0.16276	-0.828613	9.22474	-0.0898251	0.928426		0	9.22474	0	1		-1.2158	9.01254	-0.134901	0.89269
C2CD2	5.85366	-3.42958	1.32756	-2.58338	0.0097838	0.0875711	-0.71696	0.764597	-0.937697	0.3484	0.549056	-0.768357	0.716369	-1.07257	0.283464	0.563045
C2CD2L	1.54068	-1.87559	1.80033	-1.04181	0.297502		0.0310888	1.49797	0.0207539	0.983442		-3.80421	1.7496	-2.17433	0.0296803
C2CD5	932.085	-0.137102	0.152961	-0.896318	0.370083	0.681365	-0.431101	0.153293	-2.81226	0.00491942	0.0363073	-0.24907	0.148945	-1.67223	0.0944785	0.300041
C3	0.616309	-3.31701	3.14849	-1.05353	0.2921		-0.328505	3.19732	-0.102744	0.918166		2.04692	2.97586	0.687841	0.491553
C3AR1	0.0443546	0	9.22474	0	1		0	9.22474	0	1		0	9.01264	0	1
C5	9.18522	0.412907	0.569353	0.72522	0.468317	0.748117	-0.017487	0.58033	-0.0301328	0.975961	0.990969	0.911885	0.517757	1.76122	0.0782011	0.268575
C5AR1	0.73035	-3.25242	4.98465	-0.652488	0.514087		3.6558	4.90517	0.745295	0.456093		-2.63936	4.88402	-0.540407	0.588916
C5orf49	0.249523	2.78985	9.17542	0.304057	0.761084		-0.649108	9.22474	-0.070366	0.943902		2.40447	8.94584	0.268781	0.788098
C6orf62	968.871	0.518212	0.264071	1.9624	0.0497161	0.243542	0.0692792	0.264522	0.261903	0.793396	0.886071	0.190835	0.258265	0.738915	0.459959	0.717655
C9orf116	1.33093	-0.289215	2.13557	-0.135428	0.892274		-0.204021	2.13727	-0.0954586	0.923951		0.706085	2.00846	0.351556	0.725171
C9orf24	5.82903	0.517593	1.0966	0.471997	0.636929	0.853256	-0.515184	1.1132	-0.462797	0.64351	0.785227	-1.70317	1.16111	-1.46685	0.142417	0.384792
C9orf3	87.1611	0.355265	0.276385	1.2854	0.198653	0.494927	-0.213679	0.276931	-0.771596	0.440353	0.627422	0.620358	0.26435	2.34673	0.018939	0.102724
CA1	0.244972	0	9.22474	0	1		-2.75817	9.20999	-0.299476	0.764577		2.89378	8.9571	0.323071	0.746641
CA2	1.24218	-3.51218	1.94204	-1.8085	0.0705286		-1.45868	1.86797	-0.780893	0.434865		-0.822321	1.80049	-0.45672	0.647873
CA7	0.909517	-0.994734	2.35088	-0.423133	0.672198		-0.965992	2.3741	-0.406887	0.684091		-2.46087	2.29285	-1.07328	0.283145
CA9	0.342176	-2.34919	7.68446	-0.305707	0.759828		0	7.695	0	1		-0.946144	7.51808	-0.125849	0.899851
CAB39	233.783	0.647104	0.334844	1.93255	0.0532913	0.252524	0.472904	0.336324	1.4061	0.159695	0.347	0.181349	0.329413	0.550521	0.581962	0.805195
CACNA1A	17.2497	-0.608632	0.708629	-0.858887	0.390403	0.694866	-0.645078	0.693125	-0.930682	0.352018	0.551591	-0.243776	0.678529	-0.359272	0.719392	0.888012
CACNA1B	1.73331	-3.10507	1.80827	-1.71715	0.0859521		-2.4399	1.81696	-1.34285	0.179321		-1.13187	1.45965	-0.775439	0.438081
CACNA2D4	0.211969	0	9.22474	0	1		0	9.22474	0	1		-0.683896	9.01264	-0.0758819	0.939513
CALCOCO1	168.881	-0.580105	0.433664	-1.33769	0.180999	0.482732	-0.591562	0.430953	-1.37268	0.169851	0.360337	-0.334046	0.416965	-0.801137	0.423052	0.687143
CALM1	217	-0.454361	0.19932	-2.27956	0.0226341	0.150548	-0.470701	0.201686	-2.33384	0.0196043	0.0943343	-1.11286	0.205099	-5.42599	5.7635e-08	2.32141e-06
CALM3	17.3052	-1.57109	0.637638	-2.46393	0.0137424	0.114083	-0.405701	0.633087	-0.64083	0.521633	0.69365	-1.00937	0.642029	-1.57216	0.115914	0.336151
CALR	918.476	0.00020261	0.29733	0.00068143	0.999456	0.999456	-0.654937	0.297789	-2.19933	0.0278541	0.117888	0.12802	0.290568	0.440587	0.659512	0.853833
CALU	70.7277	0.374151	0.22768	1.64332	0.100317	0.360729	0.00237909	0.236584	0.010056	0.991977	0.996947	-0.0231844	0.220565	-0.105114	0.916285	0.969791
CAMK2B	666.051	-0.359604	0.175541	-2.04854	0.040507	0.213582	-1.00363	0.17607	-5.70021	1.19662e-08	5.16012e-07	-0.176897	0.16984	-1.04155	0.297619	0.578483
CAMP	0.0560027	0	9.22474	0	1		-0.328516	9.22474	-0.0356125	0.971591		-0.683896	9.01264	-0.0758819	0.939513
CAMSAP2	103.288	-0.147301	0.280229	-0.525645	0.599135	0.83083	0.0551059	0.276533	0.199274	0.842048	0.914781	0.262476	0.268051	0.979203	0.32748	0.605441
CANT1	43.1747	-0.0140101	0.254156	-0.0551241	0.95604	0.988818	0.304744	0.252771	1.20561	0.227966	0.430467	0.508448	0.246201	2.06518	0.0389063	0.168978
CANX	50.2104	0.281529	0.545153	0.516422	0.60556	0.836203	0.701673	0.551839	1.27152	0.203544	0.40498	0.563216	0.540197	1.04261	0.297128	0.578074
CAPN1	11.3061	-1.34175	0.591224	-2.26944	0.0232416	0.15272	-3.2254	0.870931	-3.70339	0.000212735	0.00321078	-1.25003	0.622842	-2.00697	0.0447526	0.187547
CAPS	6.66613	-2.49599	1.4633	-1.70573	0.0880586	0.337196	-3.63627	1.67204	-2.17475	0.0296488	0.121647	-3.0111	1.42863	-2.10768	0.0350583	0.155934
CARD16	0.0767763	-0.508062	9.22474	-0.0550761	0.956078		-0.328516	9.22474	-0.0356125	0.971591		-1.21585	9.01254	-0.134906	0.892686
CARD8	4.6566	-0.119989	0.878171	-0.136635	0.891319	0.966623	1.3228	0.821566	1.61009	0.107377	0.269464	0.290183	0.732376	0.396221	0.691942	0.869425
CARMIL1	42.1943	-0.693948	0.41308	-1.67994	0.0929696	0.348636	-1.31312	0.416992	-3.14903	0.00163815	0.0157336	0.667454	0.371371	1.79727	0.0722926	0.256209
CARS	121.601	-0.174059	0.226084	-0.769887	0.441367	0.729463	0.316491	0.224995	1.40666	0.159528	0.347	0.305311	0.217833	1.40158	0.16104	0.41402
CASC3	17.1681	0.439653	0.508488	0.864627	0.387243	0.694356	-0.493818	0.533054	-0.926393	0.354242	0.552408	0.0750504	0.504972	0.148623	0.881851	0.955192
CASK	41.2295	0.284918	0.336687	0.846241	0.397418	0.702751	0.170793	0.339736	0.502721	0.61516	0.767639	0.452046	0.328756	1.37502	0.169125	0.426737
CASP1	0.297881	-0.508062	9.22474	-0.0550761	0.956078		0	9.22474	0	1		-1.75528	9.0115	-0.194782	0.845563
CASP10	2.23059	0.627547	1.17572	0.533754	0.593512	0.827562	-2.7871	1.61063	-1.73044	0.0835515		-0.200235	1.13193	-0.176897	0.859589	0.947116
CASP2	155.224	0.712801	0.26686	2.67107	0.00756093	0.0734153	0.305257	0.267949	1.13923	0.254606	0.461391	0.453724	0.26192	1.7323	0.0832206	0.279621
CASP3	320.642	-0.621933	0.485626	-1.28068	0.200305	0.498472	-1.11249	0.48921	-2.27405	0.0229629	0.10594	-1.30886	0.477548	-2.74079	0.00612912	0.0483001
CASP4	0.176117	0	9.22474	0	1		-0.64903	9.22474	-0.0703575	0.943909		-0.946114	9.01264	-0.104976	0.916395
CASP7	3.85847	-0.0390003	0.917404	-0.0425116	0.966091	0.989608	-0.968367	0.990473	-0.977681	0.328232	0.531633	-2.6395	1.11488	-2.36752	0.0179078	0.0988102
CASP8	0.220833	-0.828654	9.22474	-0.0898296	0.928423		0	9.22474	0	1		-1.50384	9.01221	-0.166867	0.867475
CASP9	46.3768	-0.419655	0.289678	-1.44869	0.147423	0.437443	-0.00537011	0.288635	-0.0186052	0.985156	0.995404	-0.101996	0.281296	-0.362594	0.716908	0.887097
CASR	0.550356	3.31207	4.33768	0.763558	0.445131		0.633276	4.45746	0.142071	0.887024		-1.30314	4.26403	-0.305613	0.7599
CAST	53.0399	-0.206078	0.339137	-0.607653	0.543418	0.79165	0.00372666	0.326436	0.0114162	0.990891	0.996551	0.0602779	0.299603	0.201193	0.840548	0.940428
CAT	166.084	-0.510951	0.310307	-1.6466	0.0996402	0.360729	-0.628936	0.310612	-2.02483	0.0428851	0.152896	-0.225629	0.3006	-0.750597	0.452895	0.711843
CAV1	0.357973	-0.507932	8.6911	-0.0584428	0.953396		-0.648978	8.6911	-0.0746715	0.940476		-0.683756	8.49127	-0.0805245	0.93582
CAV2	0.363149	-1.22716	7.50273	-0.163562	0.870076		1.99923	7.43619	0.268851	0.788044		-0.683899	7.33172	-0.0932794	0.925682
CB	18.2399	-0.794643	0.434747	-1.82783	0.067575	0.287309	-0.324854	0.43863	-0.740612	0.458929	0.643902	0.278513	0.444763	0.626205	0.531181	0.764605
CBLB	163.296	0.18807	0.251903	0.746597	0.455307	0.737923	-0.385049	0.253445	-1.51926	0.128697	0.302082	-0.246083	0.247106	-0.995856	0.31932	0.598209
CBR1	243.523	-0.811628	0.169796	-4.78001	1.75286e-06	0.00010304	-0.0620716	0.164235	-0.377944	0.705472	0.823116	0.12679	0.158989	0.797476	0.425175	0.687806
CBR3	0.513705	-2.02852	3.06838	-0.661105	0.508545		-0.00355176	3.08711	-0.00115051	0.999082		1.20608	2.845	0.423929	0.671618
CBWD1	836.356	0.0682441	0.200652	0.340112	0.733772	0.897717	0.539818	0.200552	2.69167	0.00710953	0.0481116	0.292353	0.195982	1.49174	0.135769	0.371442
CBWD3	3.10947	0.0525801	1.08748	0.0483503	0.961437	0.989437	0.0961984	1.12511	0.085501	0.931863	0.967105	-0.059197	1.10294	-0.0536721	0.957196	0.985626
CBWD5	118.409	-0.3951	0.408107	-0.968128	0.33298	0.650119	0.201567	0.404152	0.498741	0.617962	0.767639	0.249219	0.392635	0.634735	0.525601	0.759085
CBWD6	262.768	0.0562148	0.129679	0.433493	0.664657	0.867876	0.259108	0.128257	2.02023	0.0433593	0.153934	0.253831	0.124006	2.04693	0.040665	0.173424
CBX4	330.983	-0.575579	0.172569	-3.33536	0.00085188	0.0163968	-0.357465	0.170123	-2.10121	0.0356226	0.137838	-0.306426	0.165277	-1.85401	0.0637377	0.236252
CCDC80	0.981245	-1.46461	2.37867	-0.615726	0.538075		-0.261464	2.16651	-0.120684	0.903941		-0.798623	2.19247	-0.364257	0.715666
CCDC85B	287.146	-0.660379	0.240297	-2.74817	0.00599282	0.0620685	-0.339832	0.237977	-1.428	0.153291	0.338824	-0.1624	0.231379	-0.70188	0.482754	0.734864
CCDC86	4.94367	-3.12675	1.17924	-2.6515	0.00801355	0.0766804	1.03283	0.670922	1.53941	0.123704	0.294952	0.794054	0.70773	1.12197	0.261874	0.542856
CCDC92	128.28	-0.581759	0.35931	-1.6191	0.105426	0.368411	-0.505803	0.356656	-1.41818	0.156138	0.341885	0.0153709	0.347584	0.0442222	0.964727	0.987636
CCL11	1.54456	-0.605718	2.11167	-0.286843	0.774232		0.683439	2.087	0.327474	0.74331		-1.75329	2.14679	-0.8167	0.4141
CCL14	0.170579	-0.508062	9.22474	-0.0550761	0.956078		-0.328516	9.22474	-0.0356125	0.971591		-0.683896	9.01264	-0.0758819	0.939513
CCL15	0.212452	-1.69306	9.22077	-0.183613	0.854317		2.34037	9.18987	0.254669	0.798979		-1.90699	9.01055	-0.211639	0.832388
CCL2	2.45999	0.574261	1.27466	0.45052	0.652335	0.86263	0.664294	1.23871	0.536279	0.591766	0.750091	1.05831	1.18642	0.892019	0.372383	0.644338
CCL20	0.335153	0.180254	4.92067	0.0366319	0.970778		-0.649104	4.95913	-0.130891	0.895862		0.698892	4.77533	0.146355	0.883641
CCL22	0.189197	2.47077	9.17018	0.269435	0.787595		0	9.22474	0	1		-1.21585	9.01254	-0.134906	0.892686
CCL24	0.360072	-1.22543	5.97712	-0.205021	0.837556		-0.328471	5.97903	-0.0549372	0.956188		1.27018	5.77017	0.220128	0.825772
CCL3	1.03761	-0.210753	2.10101	-0.10031	0.920098		-1.78265	2.29593	-0.77644	0.437489		-3.38874	2.24639	-1.50853	0.131419
CCL3L3	0.180477	-1.06708	9.22401	-0.115685	0.907902		-0.976301	9.22462	-0.105836	0.915712		-1.81862	9.01114	-0.201819	0.840058
CCL4	0.862359	-2.33825	2.09773	-1.11466	0.264998		-0.528477	2.01614	-0.262124	0.793226		-1.76396	2.04848	-0.861108	0.389178
CCL5	0.156875	0	9.22474	0	1		-0.328516	9.22474	-0.0356125	0.971591		-1.76002	9.01147	-0.195309	0.845151
CCL8	0.151648	0	9.22474	0	1		0	9.22474	0	1		-1.88452	9.0107	-0.209142	0.834337
CCNA1	1.54067	-0.856979	1.46087	-0.586621	0.557458		-1.12084	1.84072	-0.608918	0.542579		1.28079	1.42667	0.897744	0.369322
CCNA2	24.0532	-0.51249	0.767184	-0.668015	0.504124	0.767539	0.57422	0.762517	0.753058	0.451415	0.637608	0.674812	0.742427	0.908927	0.363388	0.637395
CCNB1	73.7079	0.5083	0.454991	1.11716	0.263924	0.57634	1.10273	0.457423	2.41074	0.01592	0.08303	0.766487	0.445068	1.72218	0.0850367	0.282764
CCNB2	57.0291	0.465456	0.408992	1.13806	0.255096	0.564429	0.481108	0.41246	1.16644	0.243438	0.448461	0.427008	0.407614	1.04758	0.294833	0.57603
CCNC	16.4268	0.3205	0.674777	0.474972	0.634807	0.853256	0.356878	0.692525	0.515329	0.606323	0.762142	-0.143832	0.684939	-0.209992	0.833674	0.938242
CCND1	6.67008	-0.898115	0.591542	-1.51826	0.128949	0.409564	-0.641787	0.588965	-1.08969	0.275852	0.47939	-0.782618	0.584886	-1.33807	0.180874	0.445024
CCND2	4.79144	-1.8489	1.14043	-1.62124	0.104967	0.368411	-1.89437	1.29413	-1.46382	0.143242	0.323686	0.0286747	0.871011	0.0329212	0.973737	0.991493
CCND3	15.7445	-0.893937	0.673573	-1.32716	0.184457	0.483977	-0.157998	0.661018	-0.239022	0.811088	0.895408	-0.802857	0.672153	-1.19446	0.232299	0.50779
CCNE2	26.9817	-0.0529726	0.372486	-0.142214	0.886911	0.966623	0.465977	0.375313	1.24157	0.214395	0.414797	0.650497	0.355376	1.83045	0.067183	0.244353
CCNF	37.9707	0.181578	0.273421	0.664098	0.506628	0.767672	0.449021	0.267543	1.67831	0.0932857	0.243951	0.621178	0.262573	2.36574	0.0179943	0.0988102
CCNG1	872.925	0.745637	0.401005	1.85942	0.0629678	0.278931	0.98336	0.401057	2.45192	0.0142094	0.077234	0.994067	0.39157	2.53867	0.0111275	0.072505
CCNG2	20.7923	0.485024	0.468845	1.03451	0.300899	0.62329	0.94227	0.481318	1.95769	0.0502669	0.169029	0.137271	0.476467	0.288102	0.773268	0.918294
CCNH	609.874	-0.223553	0.204782	-1.09166	0.274982	0.59041	0.371625	0.204228	1.81966	0.0688113	0.201942	0.204967	0.199385	1.028	0.303951	0.586597
CCP110	156.287	-0.409937	0.270133	-1.51753	0.129132	0.409564	-0.594372	0.271354	-2.1904	0.0284956	0.119014	0.369072	0.258137	1.42975	0.152788	0.401346
CCR1	0.274884	-0.828654	9.22474	-0.0898296	0.928423		0	9.22474	0	1		2.87197	8.95376	0.320756	0.748396
CCR2	0.3175	1.69586	9.20503	0.184232	0.853832		2.07456	9.17411	0.226132	0.821099		-0.9462	9.01264	-0.104986	0.916387
CCR5	0.32852	-1.81122	8.80444	-0.205717	0.837012		2.59136	8.74852	0.296206	0.767073		0.0155805	8.60688	0.00181024	0.998556
CCR7	0.325968	-2.10796	8.88819	-0.237164	0.812529		-0.976289	8.895	-0.109757	0.912602		-1.50379	8.69015	-0.173045	0.862616
CCT5	5008.7	0.308069	0.0897732	3.43163	0.000599963	0.0138503	0.216431	0.0897383	2.4118	0.0158739	0.0830236	0.297527	0.0875766	3.39733	0.000680461	0.00875741
CCT6A	5837.47	0.526434	0.169118	3.11283	0.00185303	0.0303033	0.238073	0.169179	1.40723	0.15936	0.347	0.323866	0.165257	1.95977	0.0500223	0.202982
CCT7	1243.07	0.223898	0.199683	1.12127	0.262174	0.573095	0.48442	0.199559	2.42745	0.0152053	0.0805232	0.380147	0.19511	1.94837	0.0513708	0.206364
CD14	1.97845	1.87342	1.09038	1.71814	0.0857714	0.331944	1.45561	1.11967	1.30003	0.193589		0.826279	1.15047	0.718209	0.472628	0.725453
CD163	0.336019	1.70933	9.20451	0.185705	0.852676		2.07138	9.19817	0.225195	0.821828		-3.16185	9.0004	-0.351301	0.725362
CD19	2.45909	-4.35468	1.54981	-2.80982	0.00495697	0.056617	-1.29374	1.25117	-1.03402	0.301128	0.507401	-0.428252	1.08886	-0.393304	0.694095	0.870119
CD2	0.373485	-1.96919	6.78354	-0.290289	0.771595		0.465442	6.71952	0.0692671	0.944777		1.24084	6.59457	0.188161	0.85075
CD24	74.7738	-0.225389	0.30215	-0.745949	0.455698	0.738007	-0.326973	0.307355	-1.06383	0.287407	0.492931	-0.183618	0.29772	-0.616747	0.537402	0.76898
CD27	0.450578	-0.331085	3.33373	-0.0993134	0.920889		-1.61265	3.41064	-0.472829	0.636335		0.0155836	3.34034	0.00466529	0.996278
CD320	414.816	0.143794	0.180715	0.795695	0.42621	0.717384	0.394878	0.180282	2.19033	0.0285002	0.119014	0.480931	0.175244	2.74434	0.00606319	0.0479799
CD34	0.258118	0	9.22474	0	1		0	9.22474	0	1		1.24456	8.98269	0.138551	0.889805
CD36	0.420443	-1.12196	4.94699	-0.226798	0.820581		-0.649104	4.95925	-0.130888	0.895864		0.0157915	4.82903	0.00327013	0.997391
CD37	0.137964	0	9.22474	0	1		0	9.22474	0	1		0	9.01264	0	1
CD3D	0.596676	1.7787	3.61568	0.49194	0.622762		0.617597	3.57279	0.172861	0.86276		3.0859	3.43173	0.899227	0.368532
CD3E	0.512458	-1.62863	3.62811	-0.448893	0.653509		-0.975436	3.63695	-0.268201	0.788544		-2.0299	3.52518	-0.575829	0.564731
CD4	2.4177	0.908183	1.13742	0.798461	0.424603	0.717384	0.900541	1.11367	0.808625	0.418731	0.610483	-1.70728	1.28331	-1.33037	0.183396	0.447685
CD40	0.344286	-0.828587	6.76799	-0.122427	0.902561		2.33501	6.70948	0.348017	0.727827		-0.632678	6.59631	-0.0959139	0.923589
CD44	0.5786	-0.828658	4.6057	-0.17992	0.857215		0.81677	4.48243	0.182216	0.855413		-1.85613	4.49625	-0.412818	0.67974
CD48	0
CD52	0.626977	-0.82865	4.24729	-0.195101	0.845314		-0.649095	4.24729	-0.152826	0.878536		2.30151	4.02098	0.572374	0.567068
CD55	403.334	-1.265	0.159671	-7.92257	2.32649e-15	8.15682e-13	-0.515936	0.155197	-3.32439	0.000886133	0.00965154	-0.245483	0.148998	-1.64756	0.0994431	0.30335
CD58	90.4977	-1.09925	0.255323	-4.30534	1.66729e-05	0.000755491	-0.474466	0.248149	-1.91202	0.0558739	0.177464	-0.0687065	0.232026	-0.296116	0.767141	0.916893
CD69	0.631479	0.989446	3.43065	0.288413	0.77303		-0.975382	3.57533	-0.272809	0.785		-2.86553	3.46681	-0.826561	0.408486
CD74	1.45008	0.382038	1.25872	0.303513	0.761499		-0.895981	1.53033	-0.585482	0.558224		1.34489	1.22309	1.09959	0.271512
CD79A	0.266129	0	9.22474	0	1		-1.60649	9.22178	-0.174207	0.861703		1.70458	8.97664	0.18989	0.849395
CD80	0.166399	-0.508062	9.22474	-0.0550761	0.956078		-1.84357	9.21905	-0.199974	0.841501		-2.05189	9.00965	-0.227743	0.819846
CD86	0.0414331	0	9.22474	0	1		0	9.22474	0	1		-0.9462	9.01264	-0.104986	0.916387
CD8A	1.89279	-0.505095	0.932556	-0.541624	0.588078	0.822882	0.458424	0.936825	0.489338	0.624603		-0.780851	1.13819	-0.686043	0.492686	0.741084
CD9	0.0415244	0	9.22474	0	1		0	9.22474	0	1		0	9.01264	0	1
CDA	0.401796	2.37395	7.47434	0.317613	0.750779		0	7.52417	0	1		-2.63428	7.3409	-0.35885	0.719707
CDC16	444.014	0.236638	0.181191	1.30601	0.191549	0.486137	0.344605	0.181056	1.90331	0.0570006	0.179764	0.293566	0.177229	1.65642	0.0976364	0.300792
CDC20	103.875	-0.326298	0.521356	-0.625864	0.531404	0.783705	-0.817141	0.527482	-1.54913	0.121349	0.292707	0.641108	0.498967	1.28487	0.198838	0.469059
CDC25A	12.812	-0.277799	0.557919	-0.49792	0.61854	0.842936	-1.64553	0.649048	-2.53529	0.0112353	0.0664992	0.60957	0.506597	1.20326	0.228874	0.505653
CDC25B	9.78677	-2.9124	0.834029	-3.49196	0.000479485	0.0114857	1.14326	0.488257	2.34152	0.0192052	0.0930748	1.18181	0.520625	2.26997	0.0232092	0.116313
CDC26	172.058	0.0903611	0.388133	0.23281	0.815909	0.942243	0.00380211	0.390354	0.00974017	0.992229	0.996947	-0.371066	0.38084	-0.974336	0.32989	0.6071
CDC42	2100.74	0.412507	0.413784	0.996913	0.318807	0.643292	0.415789	0.413894	1.00458	0.3151	0.520252	0.0949613	0.40436	0.234843	0.81433	0.932456
CDC45	62.1015	-1.36303	0.443158	-3.07573	0.0020999	0.0333378	-0.621705	0.429699	-1.44684	0.147942	0.331146	0.15914	0.410021	0.388128	0.697922	0.873909
CDC6	24.7315	0.635534	0.39392	1.61336	0.106666	0.371199	1.16912	0.401631	2.91094	0.00360339	0.0293299	0.844696	0.384626	2.19615	0.0280812	0.133355
CDC7	14.7331	0.0830862	0.635374	0.130767	0.895959	0.966623	0.507215	0.632731	0.801628	0.422768	0.613593	-0.272922	0.64836	-0.420942	0.673797	0.863612
CDCA3	98.1671	-0.383698	0.268102	-1.43116	0.152383	0.444281	0.33458	0.260438	1.28468	0.198903	0.3983	1.12173	0.231386	4.84785	1.24804e-06	3.87785e-05
CDCA4	15.0534	-0.728223	0.471633	-1.54405	0.122577	0.398881	0.00989057	0.433428	0.0228194	0.981794	0.994026	0.116509	0.433706	0.268636	0.78821	0.925678
CDCA5	17.1847	0.228613	0.589648	0.387711	0.69823	0.884994	1.97833	0.58773	3.36605	0.000762537	0.00880459	1.39989	0.563158	2.48579	0.0129264	0.0799716
CDCA7	2.19532	-0.686854	1.09309	-0.628359	0.529769	0.783705	0.878164	1.17292	0.748696	0.45404		-1.6936	1.29954	-1.30323	0.192497	0.463143
CDCA8	5.70026	-0.624444	0.855404	-0.729999	0.465391	0.745379	-1.16629	1.2608	-0.925038	0.354946	0.553098	2.52208	0.811506	3.10789	0.00188425	0.0198944
CDH1	0.931691	-2.32984	2.21843	-1.05022	0.293615		0.527313	1.988	0.265248	0.790818		1.93012	1.88043	1.02642	0.304692
CDH10	14.9313	-1.17099	0.534312	-2.19158	0.0284101	0.171644	-1.5249	0.555194	-2.7466	0.00602163	0.0425542	-1.26442	0.514937	-2.45548	0.0140695	0.0842541
CDH11	16.831	-1.06103	0.535845	-1.9801	0.0476923	0.236161	-0.136768	0.483989	-0.282585	0.777495	0.876185	-0.836584	0.486155	-1.72082	0.0852841	0.282764
CDH2	10286.9	-0.364464	0.371738	-0.980433	0.326872	0.649267	-0.67814	0.37174	-1.82423	0.0681169	0.200461	-0.438379	0.363145	-1.20717	0.227366	0.504612
CDH3	0.280129	0.453714	5.46624	0.083003	0.933849		-0.328508	5.46624	-0.0600977	0.952078		-0.946208	5.34056	-0.177174	0.859372
CDH5	2.89308	-0.744158	1.17538	-0.633121	0.526655	0.781893	-4.52615	1.41425	-3.2004	0.00137239	0.014077	-0.830056	0.948369	-0.875246	0.38144	0.652857
CDH6	0.0407068	0	9.22474	0	1		0	9.22474	0	1		0	9.01264	0	1
CDH7	2.67977	-3.15379	1.61983	-1.94699	0.0515361	0.249778	-4.13398	1.59153	-2.59749	0.00939067	0.0585324	-2.10483	1.36256	-1.54476	0.122404	0.349202
CDH8	0.195317	-0.828654	9.22474	-0.0898296	0.928423		-0.649108	9.22474	-0.070366	0.943902		-0.25411	9.01254	-0.0281952	0.977506
CDK1	150.297	0.381993	0.492075	0.776291	0.437577	0.725708	1.49593	0.492016	3.04041	0.00236253	0.0209749	1.1112	0.47718	2.32869	0.0198756	0.105955
CDK13	2.65066	-0.703774	1.11593	-0.63066	0.528263	0.783603	-0.809008	1.18004	-0.685575	0.492981	0.671661	0.89	0.98472	0.90381	0.366096	0.640595
CDK19	204.066	0.509847	0.199763	2.55226	0.0107026	0.0938639	0.178755	0.199711	0.895068	0.370751	0.56238	0.521787	0.192811	2.70621	0.00680555	0.050519
CDK2	21.5665	0.210471	0.52158	0.403526	0.686561	0.878896	-0.0205149	0.532207	-0.0385468	0.969252	0.988684	-0.124547	0.515476	-0.241616	0.809078	0.930563
CDK4	4007.4	-0.228003	0.238167	-0.957326	0.338403	0.657689	-0.197712	0.238164	-0.830152	0.406453	0.598908	-0.0581795	0.2325	-0.250234	0.802406	0.928345
CDK5	226.923	-0.255104	0.288243	-0.885032	0.37614	0.683462	-0.670998	0.292682	-2.29259	0.0218718	0.102597	-0.627223	0.284879	-2.20172	0.0276853	0.132262
CDK5R1	1186.04	-0.825827	0.630487	-1.30982	0.190255	0.485117	-1.33407	0.630642	-2.11541	0.0343948	0.134908	-1.016	0.615815	-1.64985	0.0989736	0.302907
CDK6	166.392	-0.30572	0.296594	-1.03077	0.302648	0.624534	0.442106	0.291087	1.51881	0.12881	0.302082	0.525686	0.28374	1.8527	0.0639254	0.236459
CDK7	466.64	0.311422	0.147474	2.11171	0.0347113	0.196607	0.217132	0.148647	1.46072	0.144092	0.324937	0.0815197	0.144612	0.563713	0.57295	0.796499
CDKN1A	4.93446	-0.85398	0.900363	-0.948484	0.342883	0.662319	2.40825	0.851587	2.82795	0.00468469	0.0353527	2.64306	0.837868	3.1545	0.00160771	0.0175829
CDKN1B	361.458	0.136353	0.169375	0.805033	0.420801	0.712805	-0.393286	0.171682	-2.29078	0.0219762	0.102597	-0.457006	0.169528	-2.69576	0.00702285	0.05143
CDKN2A	0.244507	-3.13618	9.20911	-0.340552	0.733441		-0.649108	9.22474	-0.070366	0.943902		0.0155356	9.01264	0.00172375	0.998625
CDKN3	82.5888	0.268607	0.475001	0.565487	0.571742	0.81224	0.58464	0.477641	1.22401	0.220947	0.422418	0.61821	0.456642	1.35382	0.175795	0.435005
CDT1	53.7267	-0.115847	0.316091	-0.366499	0.713993	0.890913	0.686129	0.297909	2.30315	0.0212705	0.100547	1.02708	0.283937	3.61728	0.000297714	0.00467265
CEACAM6	0
CEBPA	9.29737	0.280652	0.642201	0.437016	0.662099	0.866466	1.12447	0.612872	1.83475	0.0665422	0.197274	1.49221	0.607901	2.45469	0.0141004	0.0842541
CEBPB	59.6825	-0.20671	0.833268	-0.248071	0.804079	0.93824	1.75532	0.75048	2.33893	0.019339	0.093468	2.19474	0.727678	3.01608	0.00256063	0.0248616
CEBPD	8.70536	0.499703	0.725679	0.6886	0.491075	0.761381	2.07027	0.694848	2.97946	0.00288759	0.0245768	1.58002	0.665106	2.3756	0.0175207	0.0972129
CEBPZ	510.861	0.420412	0.187815	2.23844	0.0251923	0.163075	0.362486	0.18759	1.93233	0.0533193	0.173709	0.638631	0.182459	3.50013	0.000465027	0.00652353
CEL	49.5971	-0.675068	0.656737	-1.02791	0.303992	0.625157	-0.774906	0.65747	-1.17862	0.23855	0.444254	-0.449106	0.634409	-0.707913	0.478999	0.733162
CENPA	2.79954	0.92759	1.02683	0.903355	0.366338	0.680362	0.683382	1.28775	0.530681	0.59564	0.753645	1.01415	1.26655	0.800723	0.423292	0.687143
CENPE	2.14504	1.65586	1.2619	1.31219	0.189455	0.484781	1.13392	1.17287	0.966796	0.333646		-0.519938	1.24397	-0.417967	0.675971	0.863612
CENPF	28.9513	-0.348702	0.438758	-0.794747	0.426761	0.717384	0.8741	0.416134	2.10053	0.0356827	0.137838	0.717968	0.389999	1.84095	0.0656287	0.240498
CENPH	339.881	0.10494	0.168675	0.622147	0.533845	0.785597	0.164417	0.168295	0.976955	0.328591	0.531633	0.167297	0.159727	1.04739	0.294918	0.57603
CENPK	362.461	-0.12407	0.187863	-0.66043	0.508978	0.770135	0.298892	0.186199	1.60523	0.108443	0.270851	0.566295	0.178336	3.17545	0.00149605	0.0167727
CENPU	565.926	-0.0248931	0.210802	-0.118088	0.905998	0.970848	0.0608747	0.211222	0.288202	0.773192	0.872266	0.476146	0.205279	2.3195	0.0203678	0.107759
CENPW	361.877	-0.0512243	0.168129	-0.304672	0.760616	0.917405	0.379273	0.167807	2.26018	0.0238103	0.108387	0.92001	0.162391	5.6654	1.46678e-08	6.9353e-07
CEP55	35.3315	-0.138707	0.381346	-0.363731	0.716059	0.891428	0.352619	0.386219	0.913002	0.361242	0.556549	0.477053	0.350686	1.36034	0.173721	0.433595
CEP57	432.03	-0.364047	0.308485	-1.18011	0.237956	0.546519	-0.560629	0.309329	-1.81241	0.0699232	0.204354	-0.26545	0.299673	-0.885798	0.375726	0.648575
CER1	0.101026	0	9.22474	0	1		-0.649108	9.22474	-0.070366	0.943902		-1.48538	9.01223	-0.164818	0.869087
CERK	1.33022	-0.711123	1.6103	-0.44161	0.658771		-0.655263	1.62338	-0.403641	0.686477		0.0261031	1.39868	0.0186627	0.98511
CES1	1.26448	-1.91971	1.68016	-1.14258	0.253214		0.937414	1.34391	0.697526	0.485474		-1.45911	1.54556	-0.944066	0.345136
CES2	14.7863	-0.820081	0.574268	-1.42805	0.153279	0.445101	0.112093	0.543962	0.206067	0.836738	0.912538	0.162188	0.528488	0.30689	0.758927	0.912287
CETN3	327.075	0.150971	0.296333	0.509466	0.610426	0.83977	0.140428	0.296922	0.472946	0.636252	0.780375	-0.436968	0.289968	-1.50695	0.131823	0.366643
CFAP221	0.847812	-0.236631	2.30119	-0.10283	0.918098		-2.45308	2.23063	-1.09972	0.271453		-2.66587	2.21764	-1.20212	0.229317
CFB	0.462393	0	4.83217	0	1		-1.65406	4.82551	-0.342775	0.731768		0.676605	4.66338	0.145089	0.884641
CFH	0.399579	0	4.48953	0	1		-2.61268	4.46138	-0.585622	0.55813		-1.76114	4.38386	-0.401733	0.687881
CFHR1	0.796068	-3.23193	3.56061	-0.907691	0.364042		1.01778	3.47296	0.293057	0.769478		-2.26509	3.50742	-0.645799	0.51841
CFL2	138.539	-0.634864	0.175681	-3.61374	0.000301813	0.00899236	-0.192936	0.175557	-1.09899	0.271771	0.478543	-0.229254	0.163305	-1.40384	0.160366	0.412776
CFLAR	1.61801	-0.339999	1.31095	-0.259353	0.795363		-1.52774	1.62279	-0.941429	0.346485		3.10818	1.18825	2.61577	0.00890258
CGA	0.429495	-0.508061	6.00202	-0.0846483	0.932541		-1.38035	5.99979	-0.230066	0.81804		-0.317665	5.807	-0.0547038	0.956374
CGN	0.52775	0	3.88274	0	1		-1.37156	3.87935	-0.353555	0.723672		-2.55278	3.77518	-0.676201	0.498913
CGRRF1	9.52405	-0.27587	0.81184	-0.339808	0.734001	0.897717	1.44805	0.818084	1.77005	0.0767192	0.217302	-0.113578	0.828889	-0.137025	0.891011	0.959909
CHAC1	26.7564	0.21071	0.486206	0.433375	0.664742	0.867876	1.67119	0.445219	3.75364	0.000174286	0.00272789	1.31934	0.445721	2.96002	0.00307619	0.0282309
CHAC2	57.5103	0.101354	0.363208	0.279051	0.780205	0.924821	1.11416	0.356649	3.12398	0.00178421	0.016906	0.351511	0.343775	1.0225	0.306543	0.587084
CHAT	2.56408	-1.03174	1.37567	-0.74999	0.453261	0.736301	-0.471136	1.19687	-0.393641	0.693846	0.814489	-0.722716	1.25478	-0.575969	0.564636	0.79167
CHEK1	243.786	0.389152	0.164934	2.35944	0.0183024	0.132692	0.661579	0.164276	4.02725	5.64324e-05	0.00103688	0.708192	0.159309	4.44541	8.77244e-06	0.000216819
CHEK2	8.02092	-0.0165836	0.636184	-0.0260673	0.979204	0.994379	-0.133838	0.655489	-0.20418	0.838213	0.91296	0.222418	0.61366	0.362445	0.717019	0.887097
CHERP	165.553	0.292242	0.285547	1.02344	0.306098	0.626322	0.684948	0.283109	2.41937	0.0155472	0.0817197	0.518176	0.273515	1.89451	0.0581574	0.224277
CHIC2	125.628	0.212363	0.213294	0.995635	0.319428	0.643292	0.237503	0.211913	1.12076	0.262392	0.469064	0.223526	0.201286	1.11049	0.266788	0.546903
CHKA	215.867	0.757513	0.22841	3.31647	0.000911635	0.0170932	0.304207	0.230124	1.32192	0.186193	0.383377	0.415088	0.223499	1.85722	0.0632798	0.236129
CHMP2B	14.2327	-0.0236065	0.49064	-0.0481137	0.961626	0.989437	-0.289598	0.552968	-0.523715	0.600477	0.757497	-0.233591	0.468972	-0.498091	0.61842	0.82898
CHMP4A	1508.85	-0.617746	0.420647	-1.46856	0.141952	0.429409	-0.72027	0.420621	-1.7124	0.0868239	0.232521	-0.274481	0.410466	-0.668704	0.503684	0.747974
CHMP4C	1.71221	-3.06868	1.66929	-1.83831	0.0660165		0.327267	1.33795	0.244602	0.806764		-0.31661	1.23206	-0.256976	0.797198
CHMP6	137.647	-1.14737	0.513765	-2.23326	0.0255317	0.163867	-1.23629	0.513403	-2.40803	0.0160389	0.083268	-0.598686	0.497683	-1.20295	0.228997	0.505653
CHN1	108.415	-0.0728736	0.348156	-0.209313	0.834204	0.949447	0.142459	0.352122	0.404572	0.685792	0.810229	-0.245194	0.340784	-0.719499	0.471834	0.725453
CHP1	50.7479	-0.0649705	0.332188	-0.195583	0.844936	0.954444	-0.0637242	0.33373	-0.190945	0.848569	0.918449	0.341843	0.329532	1.03736	0.299568	0.580713
CHRNA2	0.591181	-0.886505	2.16645	-0.409197	0.682395		-0.966112	2.2871	-0.422418	0.67272		-0.789508	2.23007	-0.354028	0.723318
CHRNA4	25.1305	-2.01331	0.564038	-3.56946	0.000357713	0.00960525	-4.54541	0.800168	-5.68057	1.34244e-08	5.67316e-07	-2.01885	0.545873	-3.69839	0.000216976	0.00363017
CHRNB2	50.1068	-1.67342	0.358465	-4.66828	3.03727e-06	0.000173844	-1.10037	0.321945	-3.41789	0.00063109	0.00789049	0.171192	0.283582	0.603676	0.546059	0.776225
CHST11	36.3811	0.209403	0.311509	0.672221	0.501443	0.766975	0.629847	0.304529	2.06826	0.0386152	0.14467	-0.0418459	0.302938	-0.138133	0.890135	0.959863
CHST13	0.14851	0	9.22474	0	1		-0.646664	9.22177	-0.0701237	0.944095		-0.254068	9.01254	-0.0281905	0.97751
CHUK	32.2802	0.971238	0.559982	1.73441	0.0828454	0.325544	1.02227	0.565984	1.80618	0.0708909	0.205789	0.194035	0.558122	0.347658	0.728097	0.894696
CIAPIN1	55.5021	0.711399	0.31297	2.27306	0.0230226	0.15174	0.556867	0.316524	1.75932	0.078523	0.21976	0.102412	0.310142	0.330209	0.741242	0.902183
CIB1	39.1575	-0.469974	0.440908	-1.06592	0.286458	0.608444	-0.959157	0.460756	-2.0817	0.0373695	0.141509	0.289337	0.44006	0.657494	0.510863	0.751158
CIDEC	0.489113	-2.60151	4.86509	-0.53473	0.592837		0	4.88674	0	1		1.7741	4.68981	0.378288	0.705217
CIRBP	26.0827	-0.401588	0.437881	-0.917118	0.359081	0.674439	-0.28867	0.464241	-0.621811	0.534066	0.705981	0.0541684	0.44048	0.122976	0.902126	0.963716
CISD1	48.1245	0.247728	0.442765	0.559502	0.575819	0.813605	1.1861	0.442688	2.67932	0.00737709	0.0490877	0.372284	0.446034	0.834653	0.403913	0.671965
CIT	15.4698	-2.84597	1.26239	-2.25443	0.0241688	0.157387	-0.131787	0.819947	-0.160726	0.872309	0.930314	0.54004	0.734086	0.735663	0.461936	0.718278
CITED2	29.5168	-1.62143	0.673304	-2.40817	0.0160326	0.122686	0.906812	0.636593	1.42448	0.154309	0.339994	1.19857	0.622583	1.92516	0.0542097	0.213212
CKS1B	109.271	0.677004	0.407013	1.66335	0.0962424	0.35545	0.873821	0.409294	2.13495	0.0327654	0.130629	0.327003	0.401685	0.81408	0.415599	0.678625
CKS2	756.953	0.622691	0.386495	1.61112	0.107153	0.371459	1.16632	0.3867	3.01608	0.00256067	0.022451	0.754993	0.377798	1.9984	0.0456728	0.189216
CLDN1	0.0761168	0	9.22474	0	1		-0.328516	9.22474	-0.0356125	0.971591		-1.193	9.01256	-0.132371	0.894691
CLDN2	0.128718	0	9.22474	0	1		-0.328475	9.22474	-0.035608	0.971595		-1.18565	9.01257	-0.131555	0.895336
CLDN20	0.520836	0.871364	3.29344	0.264576	0.791336		-2.09596	3.41755	-0.613293	0.539683		1.14543	3.24428	0.353062	0.724042
CLDN3	0.193317	0	9.22474	0	1		0	9.22474	0	1		1.89407	8.94918	0.211648	0.832382
CLDN5	30.1839	-2.87664	0.495888	-5.80098	6.59303e-09	7.46197e-07	-4.40022	0.751976	-5.85154	4.87044e-09	2.23723e-07	-4.09985	0.657891	-6.23181	4.61068e-10	2.71033e-08
CLDN7	0.155818	0	9.22474	0	1		0	9.22474	0	1		0.686996	8.98225	0.0764838	0.939034
CLEC4A	12.456	1.43451	0.467628	3.06763	0.0021576	0.0340057	1.70778	0.47058	3.6291	0.000284413	0.00406057	0.763487	0.486388	1.56971	0.116483	0.336903
CLEC7A	0.710992	0.144744	2.4894	0.0581442	0.953634		1.02854	2.32533	0.44232	0.658257		-0.31348	2.30323	-0.136105	0.891739
CLIC4	1597.85	0.158533	0.13418	1.1815	0.237404	0.546405	-0.102748	0.134363	-0.764705	0.444447	0.631976	-0.212301	0.130926	-1.62153	0.104904	0.31602
CLK1	161.011	0.20061	0.551695	0.363625	0.716138	0.891428	0.611314	0.552571	1.10631	0.268593	0.473962	-0.430314	0.541896	-0.794091	0.427143	0.687993
CLK2	498.1	-0.0933902	0.195658	-0.477313	0.633139	0.85268	0.334908	0.193957	1.72671	0.0842199	0.228179	0.49343	0.188877	2.61245	0.0089897	0.0616801
CLPX	50.3108	0.00890366	0.409385	0.0217489	0.982648	0.994543	-0.0655738	0.420085	-0.156096	0.875957	0.930704	-0.0193511	0.415122	-0.0466153	0.96282	0.987636
CLSTN1	615.451	-0.225918	0.213089	-1.0602	0.289052	0.61097	-0.660359	0.213166	-3.09786	0.00194925	0.0180416	-0.348635	0.207529	-1.67993	0.0929704	0.297369
CLTB	392.21	-0.885097	0.326426	-2.71148	0.00669833	0.0677621	-0.811198	0.325022	-2.49583	0.0125664	0.0722504	-0.65071	0.315846	-2.06021	0.0393783	0.169438
CLTC	263.525	0.455218	0.373004	1.22041	0.222309	0.527288	0.362281	0.373793	0.969203	0.332444	0.533148	0.300313	0.366769	0.818807	0.412897	0.677104
CLU	7.84996	0.283774	0.737791	0.384626	0.700514	0.887296	-3.47029	1.22933	-2.82291	0.00475901	0.0355701	-2.12931	0.877263	-2.42723	0.0152148	0.0889572
CMPK2	1.85318	-3.01618	1.58184	-1.90676	0.0565513		-3.38407	1.59069	-2.12743	0.0333845		-0.464395	1.2445	-0.373159	0.70903
CMSS1	227.678	0.0743747	0.404939	0.183669	0.854273	0.954444	0.137534	0.406439	0.338388	0.735071	0.845149	0.0827924	0.398242	0.207894	0.835311	0.938242
CMTM2	0.381836	-2.47736	6.65248	-0.372396	0.709598		0.95385	6.66659	0.143079	0.886228		2.09919	6.43608	0.32616	0.744303
CNDP2	1.99984	-0.0976324	1.32409	-0.0737353	0.941221	0.980908	-0.614358	1.2577	-0.488478	0.625211		1.46133	1.25302	1.16625	0.243515	0.518244
CNKSR3	27.7711	-0.456785	0.374091	-1.22105	0.222066	0.527288	-0.158818	0.363049	-0.437457	0.66178	0.795217	-0.787345	0.37382	-2.10622	0.0351856	0.156181
CNN1	2.74886	-1.67239	1.5189	-1.10105	0.270874	0.58622	-2.7685	1.63299	-1.69536	0.0900071	0.238029	-0.791435	1.26885	-0.623742	0.532797	0.766424
CNN3	5814.58	0.12682	0.125895	1.00734	0.31377	0.637432	0.148834	0.125878	1.18236	0.237062	0.442501	0.230077	0.122937	1.8715	0.0612753	0.231781
CNOT4	294.995	0.0770293	0.172431	0.446727	0.655072	0.865077	0.0512311	0.170614	0.300276	0.763967	0.866951	0.287986	0.165779	1.73717	0.0823576	0.278149
CNPY2	3.72329	-0.776559	0.89051	-0.872038	0.383187	0.689928	0.0136343	0.811665	0.0167979	0.986598	0.99555	-0.585491	0.877229	-0.667433	0.504496	0.747974
CNPY3	758.336	-0.021058	0.144627	-0.145602	0.884235	0.965484	-0.317472	0.144889	-2.19114	0.0284418	0.119014	0.197477	0.140281	1.40772	0.159214	0.41127
CNTN1	18.8114	-1.16469	0.503658	-2.31246	0.0207521	0.141936	0.182426	0.435104	0.41927	0.675019	0.801751	0.29502	0.420902	0.700924	0.483351	0.734864
COA6	130.614	-0.128872	0.509175	-0.2531	0.800191	0.937083	0.808373	0.509501	1.5866	0.112604	0.277762	-0.0331256	0.498706	-0.066423	0.947041	0.982736
COASY	30.2821	-1.28137	0.401493	-3.19151	0.00141533	0.0248254	-0.325742	0.364475	-0.89373	0.371467	0.562921	0.175011	0.356724	0.490606	0.623705	0.83142
COG2	256.98	-0.0231598	0.166567	-0.139042	0.889417	0.966623	0.0339386	0.164925	0.205782	0.836961	0.912538	0.263122	0.157495	1.67067	0.0947862	0.300041
COG4	347.52	0.231063	0.131633	1.75535	0.079199	0.313766	0.252405	0.130731	1.93071	0.0535184	0.173709	0.283587	0.12739	2.22613	0.0260053	0.126254
COG7	1.43659	0.345693	1.61832	0.213613	0.830849		-1.27782	1.7278	-0.739564	0.459564		-0.315493	1.50339	-0.209855	0.833781
COIL	296.241	0.484521	0.142126	3.4091	0.000651776	0.0141761	0.401472	0.142293	2.82144	0.00478083	0.0355701	0.210308	0.137238	1.53244	0.125414	0.354715
COL10A1	0.520299	-2.15891	6.6599	-0.324165	0.745813		-0.623725	6.63538	-0.0939998	0.925109		-2.28346	6.50957	-0.350786	0.725749
COL11A1	3.51509	-0.18443	0.755182	-0.244219	0.807061	0.939755	-0.372351	0.79916	-0.465928	0.641267	0.784142	-0.707956	0.770833	-0.91843	0.358394	0.632204
COL12A1	0.885017	-1.34977	2.38346	-0.566307	0.571185		-0.974116	2.39029	-0.407531	0.683618		-0.568767	2.21628	-0.256631	0.797464
COL15A1	0.573765	-0.508061	4.16126	-0.122093	0.902825		1.07787	4.05323	0.265929	0.790294		-1.527	4.04988	-0.377048	0.706138
COL16A1	35.9222	-0.418393	0.353	-1.18525	0.235918	0.544715	-0.962815	0.367493	-2.61996	0.00879408	0.0556344	-0.332656	0.326022	-1.02035	0.307563	0.587084
COL1A1	15.7844	-0.815189	0.497126	-1.6398	0.101046	0.361473	-1.40843	0.513261	-2.74409	0.00606793	0.0427384	-1.54786	0.573612	-2.69844	0.00696651	0.0513632
COL1A2	9.93961	0.212821	0.565349	0.376441	0.706589	0.89027	0.00479283	0.544077	0.00880909	0.992971	0.997219	-0.650684	0.535361	-1.21541	0.224209	0.498624
COL2A1	3.74154	-0.327786	1.08959	-0.300836	0.76354	0.919036	-0.0582959	1.09824	-0.053081	0.957667	0.983261	0.147277	1.04654	0.140728	0.888085	0.959079
COL3A1	0.38707	0	6.75341	0	1		0.902787	6.68827	0.134981	0.892627		-0.253872	6.59799	-0.0384772	0.969307
COL4A1	4.86675	0.0309571	0.827545	0.0374083	0.970159	0.990191	0.785057	0.705719	1.11242	0.265957	0.472355	1.02644	0.666428	1.54022	0.123507	0.351147
COL4A2	5.17929	0.860437	0.779452	1.1039	0.269637	0.585387	1.3195	0.70651	1.86763	0.061814	0.190608	2.22981	0.67896	3.28416	0.00102289	0.0122916
COL4A3BP	159.623	0.614516	0.259894	2.36449	0.0180549	0.131336	0.340231	0.261037	1.30338	0.192445	0.390247	0.283924	0.256089	1.10869	0.267563	0.547975
COL5A1	8.51921	-0.525918	0.745535	-0.705424	0.480547	0.754105	-1.31964	0.760544	-1.73512	0.0827192	0.226113	0.116937	0.613459	0.190619	0.848824	0.943338
COL5A2	1.98191	0.190501	1.28837	0.147862	0.882452	0.965374	1.68778	1.25116	1.34897	0.177347		0.438258	1.24873	0.350963	0.725616	0.892151
COL5A3	0.262913	0	9.22474	0	1		-0.9763	9.22462	-0.105836	0.915712		2.83138	8.95429	0.316204	0.751848
COL6A3	1.6087	-3.34028	1.64961	-2.02489	0.0428791		0.523557	1.45956	0.358709	0.719813		-2.9527	1.61702	-1.82601	0.0678485
COL8A2	0.927376	1.10528	2.26469	0.48805	0.625514		-1.96729	2.52513	-0.779084	0.43593		0.30968	2.29578	0.134891	0.892698
COMT	168.565	-0.0797277	0.15817	-0.504064	0.614217	0.841511	0.272842	0.157634	1.73085	0.0834778	0.227598	0.454821	0.153129	2.97019	0.00297614	0.0275451
COPA	50.9674	-0.167728	0.327117	-0.512746	0.608129	0.838201	-0.16657	0.333969	-0.498758	0.61795	0.767639	0.287121	0.318017	0.902847	0.366607	0.640973
COPB2	56.1658	0.329743	0.390671	0.844041	0.398646	0.703208	0.578984	0.3874	1.49454	0.135035	0.311938	0.478644	0.381565	1.25442	0.209688	0.484031
COPS5	519.643	0.134262	0.159798	0.840197	0.400798	0.704618	0.127474	0.160035	0.796536	0.42572	0.615877	-0.106631	0.154509	-0.690132	0.490111	0.739759
COPS7A	7.08778	0.265583	0.708357	0.374929	0.707714	0.89027	0.281158	0.699816	0.40176	0.68786	0.810887	0.775712	0.649219	1.19484	0.23215	0.50779
COPZ1	339.753	0.365254	0.291734	1.25201	0.210567	0.511712	0.657096	0.29204	2.25002	0.0244479	0.110282	0.41733	0.286351	1.45741	0.145003	0.387923
COQ5	70.4905	0.50358	0.307581	1.63722	0.101584	0.362178	0.409565	0.314422	1.3026	0.192712	0.390413	0.0593126	0.306793	0.193331	0.8467	0.942646
CORO1A	14.2854	-0.471011	0.527094	-0.893598	0.371537	0.682511	-0.812811	0.533963	-1.52222	0.127953	0.300827	0.0324637	0.50673	0.0640651	0.948918	0.983277
COX6B1	105.027	0.0273068	0.58084	0.0470125	0.962503	0.989437	1.20266	0.582219	2.06565	0.0388613	0.144822	0.301487	0.570612	0.528357	0.597251	0.815019
COX6C	0.943243	1.3828	1.74302	0.793338	0.427581		-0.552709	2.0214	-0.273429	0.784524		-0.750894	1.98115	-0.379018	0.704674
COX8A	281.165	0.0871171	0.425582	0.204701	0.837806	0.950562	0.789388	0.426222	1.85206	0.0640173	0.193517	0.541246	0.417906	1.29514	0.195273	0.465699
CPA3	0.220019	0	9.22474	0	1		0.953812	9.22474	0.103397	0.917648		-1.78364	9.01133	-0.197932	0.843098
CPNE3	425.443	-0.079217	0.194242	-0.407827	0.683401	0.877073	-0.563519	0.196504	-2.86772	0.00413437	0.0323552	-0.236546	0.190127	-1.24415	0.213445	0.486118
CPOX	29.2229	-0.462002	0.353983	-1.30515	0.19184	0.486309	0.0614145	0.346688	0.177146	0.859394	0.92566	0.4492	0.355584	1.26327	0.206491	0.480341
CPS1	15.8191	-1.23542	0.599036	-2.06235	0.0391749	0.209865	-0.279007	0.589084	-0.473628	0.635765	0.780375	0.560491	0.566414	0.989543	0.322398	0.60087
CPSF4	179.909	-0.20623	0.156533	-1.31748	0.187676	0.483977	-0.0232315	0.154628	-0.150241	0.880575	0.933127	0.495284	0.144568	3.42596	0.00061264	0.00812495
CPSF4L	0.685727	-0.686892	3.19614	-0.214913	0.829835		2.11256	3.04282	0.694278	0.487508		1.75168	2.95941	0.5919	0.553918
CR1L	0.467757	0	5.88466	0	1		1.11751	5.86145	0.190654	0.848797		-2.44845	5.73893	-0.426638	0.669643
CRABP2	5.33118	-0.583263	0.935948	-0.623179	0.533167	0.785131	-0.691301	0.886682	-0.77965	0.435597	0.623795	-2.92232	1.24434	-2.34849	0.0188495	0.102494
CREB1	345.201	0.00711166	0.173051	0.0410958	0.96722	0.989608	-0.0745207	0.172953	-0.430872	0.666562	0.797745	0.302884	0.166149	1.82297	0.0683086	0.246387
CREBBP	49.1663	-0.0982987	0.477086	-0.20604	0.83676	0.950367	0.0286574	0.472635	0.0606331	0.951651	0.980183	0.585858	0.456545	1.28324	0.199408	0.469385
CREBRF	51.004	0.697297	0.266919	2.61239	0.00899105	0.0828115	0.586894	0.271603	2.16085	0.0307068	0.125016	1.35603	0.257421	5.26772	1.38125e-07	5.0919e-06
CREG1	27.1859	-0.966222	0.485033	-1.99207	0.0463629	0.230764	-0.203161	0.475939	-0.426863	0.669479	0.798296	-0.771493	0.461048	-1.67334	0.0942597	0.300041
CRELD2	73.9118	0.854848	0.327011	2.61412	0.00894567	0.0827951	0.497741	0.332677	1.49617	0.13461	0.311875	1.14202	0.319104	3.57883	0.000345132	0.00521292
CREM	53.4782	-0.168948	0.403856	-0.418336	0.675701	0.872494	0.158545	0.408095	0.3885	0.697646	0.817143	0.0497938	0.399778	0.124554	0.900877	0.962854
CRIM1	84.7067	-0.92446	0.272065	-3.39794	0.00067895	0.0146001	-0.511424	0.258403	-1.97917	0.0477967	0.163686	0.26277	0.240428	1.09293	0.274425	0.554201
CRISP3	2.53028	-0.942009	1.38932	-0.678036	0.497749	0.766283	-0.883878	1.70169	-0.519413	0.603473	0.759916	0.0239675	1.30628	0.0183479	0.985361	0.997651
CRK	56.4645	0.0618358	0.448629	0.137833	0.890372	0.966623	-0.542391	0.451998	-1.19999	0.230145	0.433419	-0.249422	0.438747	-0.568488	0.569704	0.794815
CRKL	164.41	0.659962	0.258767	2.55041	0.0107595	0.0939837	0.635249	0.259637	2.44668	0.014418	0.0775195	0.586935	0.253895	2.31172	0.020793	0.108714
CRNDE	0.538669	-2.33797	5.35907	-0.436265	0.662645		1.42366	5.32865	0.267172	0.789337		2.1676	5.15261	0.420681	0.673988
CRP	0.368713	-2.17727	8.73863	-0.249154	0.803241		-0.649107	8.74625	-0.0742155	0.940839		-2.73715	8.53541	-0.320682	0.748452
CRTAM	0.290318	-0.828654	9.22474	-0.0898296	0.928423		-2.49357	9.21207	-0.270685	0.786634		-2.28889	9.00768	-0.254104	0.799415
CRTAP	1512.42	0.201696	0.10495	1.92182	0.0546284	0.257179	0.311411	0.104551	2.97855	0.00289618	0.0245768	0.462252	0.101413	4.55811	5.16148e-06	0.000135256
CRY1	351.247	0.0743696	0.145755	0.510238	0.609884	0.839556	0.159524	0.145795	1.09417	0.273879	0.47939	0.333494	0.141288	2.36039	0.018256	0.0997657
CRYAB	0.839464	-0.828655	2.73514	-0.302966	0.761916		0.276841	2.54737	0.108677	0.913459		-1.30309	2.54916	-0.511185	0.609222
CRYZ	31.2645	0.210647	0.600302	0.350902	0.725662	0.895751	0.355167	0.602531	0.589458	0.555554	0.720152	0.0375266	0.583032	0.0643646	0.94868	0.983277
CS	31.5699	-0.0509095	0.325776	-0.156271	0.875819	0.965374	-0.00943462	0.327223	-0.0288324	0.976998	0.991069	0.273049	0.327259	0.834351	0.404083	0.671965
CSF1	0.214885	-1.25855	9.2234	-0.136451	0.891464		-0.328362	9.22474	-0.0355958	0.971605		-0.946032	9.01264	-0.104967	0.916402
CSF1R	0.31463	-2.53022	9.21404	-0.274605	0.78362		-1.38404	9.22327	-0.150059	0.880718		0	9.01264	0	1
CSF2	0.66622	-0.82863	4.55893	-0.18176	0.855771		1.68242	4.47159	0.376245	0.706735		2.03671	4.35213	0.467981	0.639798
CSF2RB	0.183485	-1.5809	9.22158	-0.171435	0.863882		0.953812	9.22474	0.103397	0.917648		-1.50384	9.01221	-0.166867	0.867475
CSF3	0.0690012	0	9.22474	0	1		0	9.22474	0	1		0	9.01264	0	1
CSF3R	0.109133	-0.828654	9.22474	-0.0898296	0.928423		0	9.22474	0	1		-0.9462	9.01264	-0.104986	0.916387
CSK	7.08194	-1.60353	0.866532	-1.85051	0.0642398	0.282266	-1.32233	0.793452	-1.66655	0.0956033	0.247865	0.111791	0.697371	0.160303	0.872642	0.952593
CSNK1A1	213.518	-0.142536	0.254949	-0.559076	0.57611	0.813605	-0.00308942	0.254834	-0.0121233	0.990327	0.996458	0.460952	0.246209	1.8722	0.0611795	0.231781
CSNK1D	191.803	0.473143	0.204247	2.31652	0.0205299	0.141585	0.135859	0.204115	0.665601	0.505666	0.682294	0.445886	0.19813	2.25047	0.0244192	0.120708
CSNK1E	6.63583	0.0796183	0.75579	0.105344	0.916103	0.972912	0.963089	0.74489	1.29293	0.196036	0.395629	0.012337	0.76266	0.0161763	0.987094	0.998107
CSNK2A2	95.1976	0.110025	0.316758	0.347348	0.72833	0.897517	0.0453528	0.317396	0.14289	0.886377	0.936926	-0.490963	0.310238	-1.58254	0.113527	0.333227
CSRNP1	110.325	0.128754	0.243553	0.528648	0.59705	0.830113	-0.207139	0.242445	-0.854373	0.392898	0.584788	0.291425	0.232984	1.25084	0.210993	0.484031
CSRP1	0.377183	-1.15329	4.50582	-0.255955	0.797985		-1.70818	4.49952	-0.379636	0.704215		0.0155959	4.40426	0.00354109	0.997175
CST1	0.35134	-0.828615	6.76394	-0.122505	0.902499		0.3127	6.76394	0.0462305	0.963127		0.416468	6.56595	0.0634284	0.949425
CST6	0.204854	-2.59068	9.21345	-0.281184	0.778569		-0.328516	9.22474	-0.0356125	0.971591		-1.70638	9.01175	-0.189351	0.849818
CSTA	0.345602	0	9.22474	0	1		0	9.22474	0	1		-0.683896	9.01264	-0.0758819	0.939513
CT45A6	1.26386	-3.31732	3.09802	-1.07078	0.284266		-2.21476	3.11798	-0.710319	0.477506		-4.66498	3.02235	-1.54349	0.122711
CTCF	15.5902	-0.74325	0.453733	-1.63808	0.101406	0.362163	-0.373552	0.453107	-0.824423	0.409699	0.601505	-0.00110242	0.439864	-0.00250628	0.998	0.999999
CTGF	11.7876	-2.3668	0.841045	-2.81412	0.00489106	0.056617	-1.80947	0.84056	-2.1527	0.0313424	0.126387	0.659715	0.660296	0.99912	0.317736	0.59627
CTH	10.8441	-2.51024	0.828945	-3.02824	0.00245982	0.0371535	1.11444	0.597097	1.86643	0.0619816	0.190608	0.0691422	0.570228	0.121254	0.90349	0.964112
CTHRC1	9.45706	-0.81124	0.82988	-0.977538	0.328303	0.649279	0.517755	0.81779	0.633115	0.526659	0.698137	-0.851265	0.827704	-1.02847	0.303731	0.586597
CTNNAL1	40.544	0.0394537	0.49033	0.0804634	0.935869	0.980908	-0.0795695	0.493027	-0.16139	0.871786	0.930314	0.331118	0.471609	0.702102	0.482616	0.734864
CTNNB1	2656.08	0.312961	0.276128	1.13339	0.25705	0.567593	0.172051	0.276207	0.622907	0.533346	0.705673	0.0878494	0.269859	0.325539	0.744773	0.904196
CTNND1	75.8805	-0.258799	0.297195	-0.870807	0.38386	0.690566	0.581478	0.284964	2.04053	0.0412976	0.150141	0.62551	0.27589	2.26724	0.0233753	0.116391
CTPS1	861.405	0.0972687	0.11837	0.821734	0.411228	0.706767	-0.115785	0.118501	-0.977088	0.328526	0.531633	0.0442854	0.115708	0.382735	0.701916	0.876877
CTSB	147.001	-0.469172	0.225331	-2.08215	0.0373287	0.204509	-0.869549	0.229061	-3.79615	0.00014696	0.00237044	-0.272304	0.218005	-1.24907	0.211638	0.484031
CTSD	36.271	-0.247063	0.349761	-0.706377	0.479954	0.754105	0.0908007	0.347425	0.261354	0.79382	0.886076	0.218027	0.341778	0.637922	0.523524	0.757595
CTSG	0.956171	-2.17655	2.55445	-0.852061	0.39418		-2.0763	2.55081	-0.813979	0.415657		1.72894	2.21384	0.780971	0.434819
CTSL	12.6721	-0.800438	0.577719	-1.38551	0.165895	0.464397	-0.566173	0.582885	-0.971329	0.331385	0.533148	0.95235	0.544449	1.7492	0.0802568	0.272555
CTSS	28.1006	1.54161	0.372735	4.13594	3.5351e-05	0.00148123	0.643446	0.385668	1.66839	0.0952377	0.24722	0.111271	0.379587	0.293135	0.769419	0.917984
CTTN	156.042	0.236161	0.22176	1.06494	0.286904	0.608796	-0.147223	0.222602	-0.661372	0.508374	0.683808	-0.0355407	0.215213	-0.165142	0.868832	0.951516
CTTNBP2	8.07953	0.0424488	0.687728	0.0617233	0.950783	0.985209	1.44436	0.68992	2.09351	0.0363035	0.138883	1.20942	0.65661	1.84191	0.0654879	0.240498
CX3CL1	0.596408	-2.41772	6.58654	-0.367071	0.713566		2.42584	6.52137	0.371984	0.709905		-1.41726	6.43985	-0.220077	0.825811
CXCL1	1.08691	1.89187	2.89743	0.652947	0.51379		2.0303	2.94375	0.689698	0.490384		-1.19524	2.98153	-0.400879	0.688509
CXCL11	0.165005	-1.22821	9.2235	-0.133161	0.894066		0	9.22474	0	1		-1.50384	9.01221	-0.166867	0.867475
CXCL12	2.36355	-1.26025	1.29686	-0.971771	0.331165	0.650119	1.21222	1.18464	1.02328	0.306176		1.57108	1.13648	1.38241	0.166846	0.422948
CXCL14	2.61332	0.173477	1.18144	0.146836	0.883262	0.965374	0.130913	1.1467	0.114166	0.909106	0.953321	0.335009	1.06383	0.314908	0.752832	0.910177
CXCL17	0.0740395	0	9.22474	0	1		0	9.22474	0	1		0	9.01264	0	1
CXCL2	0.479797	0	4.84977	0	1		1.40823	4.82396	0.291924	0.770345		-2.03857	4.73267	-0.430744	0.666654
CXCL3	0.263173	2.46926	9.17542	0.269117	0.78784		0	9.22474	0	1		-1.52492	9.00563	-0.169329	0.865538
CXCL5	2.83528	-0.441691	1.04221	-0.423803	0.671709	0.870743	-0.193721	1.06493	-0.18191	0.855653	0.923389	-0.604322	1.11836	-0.540364	0.588946	0.811246
CXCL6	0.203398	0	9.22474	0	1		-1.8336	9.21916	-0.19889	0.842349		-0.254111	9.01254	-0.0281952	0.977506
CXCL8	1.05388	-2.97847	2.88509	-1.03237	0.3019		1.43956	2.71694	0.529846	0.596218		1.639	2.5883	0.633233	0.526581
CXCL9	0.210606	-0.508062	9.22474	-0.0550761	0.956078		-0.9763	9.22462	-0.105836	0.915712		1.24456	8.98269	0.138551	0.889805
CXCR4	376.748	-1.15285	0.278768	-4.13553	3.54133e-05	0.00148123	0.607714	0.274158	2.21665	0.0266467	0.115171	0.494019	0.268051	1.843	0.0653289	0.240424
CXorf56	2.08609	0.121069	1.08401	0.111686	0.911072	0.97108	2.33191	1.06045	2.19897	0.02788		1.16998	0.987473	1.18482	0.236089	0.511448
CYAT1	0.328362	0	9.22474	0	1		-1.43184	9.22301	-0.155247	0.876627		1.97717	8.95891	0.220693	0.825332
CYB561	5.03054	-1.31461	0.745758	-1.76279	0.0779362	0.310518	-1.58924	0.853467	-1.8621	0.062589	0.19097	-0.928257	0.749764	-1.23807	0.215691	0.488167
CYBB	0.490986	-1.77431	4.63047	-0.383182	0.701585		-1.70954	4.63141	-0.369118	0.71204		-2.47623	4.51909	-0.54795	0.583726
CYBRD1	1.98289	-1.17963	1.25761	-0.937991	0.348249	0.667419	-0.588697	1.11015	-0.530287	0.595913		0.191263	1.06892	0.178932	0.857991	0.946773
CYC1	85.1752	-0.788553	0.435744	-1.80967	0.0703467	0.295375	-0.353696	0.431862	-0.819004	0.412784	0.60319	-0.0814442	0.42092	-0.193491	0.846574	0.942646
CYCS	898.851	-0.0778375	0.154487	-0.503844	0.614371	0.841511	-0.401415	0.154971	-2.59026	0.00959023	0.0590792	-0.097456	0.15009	-0.649315	0.516135	0.753562
CYP11A1	0.0973929	1.4684	9.20155	0.159582	0.873211		0	9.22474	0	1		0.540143	9.01264	0.0599317	0.95221
CYP11B1	0.131821	-0.508021	9.22474	-0.0550716	0.956081		-0.328475	9.22474	-0.035608	0.971595		2.41265	8.96065	0.26925	0.787738
CYP11B2	1.77728	1.27958	1.35465	0.944587	0.34487		-1.6387	1.64423	-0.99664	0.318939		-2.13537	1.58184	-1.34993	0.177039
CYP17A1	0.236095	-1.22814	9.2235	-0.133153	0.894072		3.39529	9.16882	0.370308	0.711153		0	9.01264	0	1
CYP19A1	0.50153	-0.508039	3.6413	-0.139521	0.889038		-2.02257	3.62115	-0.558544	0.576473		-0.253111	3.55731	-0.0711525	0.943276
CYP1A1	1.58348	0.522645	1.79075	0.291858	0.770395		-0.0712906	1.73534	-0.0410816	0.967231		-4.49455	1.86919	-2.40454	0.0161927
CYP1A2	0.722237	1.66074	2.24186	0.740787	0.458823		1.45814	2.14305	0.680405	0.496248		-1.81987	2.30331	-0.790111	0.429463
CYP1B1	0.498354	-2.1211	3.8985	-0.544083	0.586385		-0.328506	3.91483	-0.0839133	0.933125		-1.91829	3.81964	-0.502219	0.615514
CYP24A1	0.388105	-2.36186	8.74315	-0.270138	0.787054		0	8.75255	0	1		0.283668	8.49776	0.0333816	0.97337
CYP26A1	0.211819	0	9.22474	0	1		0	9.22474	0	1		0.471275	8.98986	0.052423	0.958192
CYP26B1	18.3776	-2.11579	0.75657	-2.79655	0.00516513	0.0576111	-2.82005	0.792781	-3.55716	0.000374888	0.00504546	-0.854992	0.659066	-1.29728	0.194535	0.464977
CYP2A13	0.133754	0	9.22474	0	1		-0.328516	9.22474	-0.0356125	0.971591		0	9.01264	0	1
CYP2A6	0.196666	0	9.22474	0	1		-0.328516	9.22474	-0.0356125	0.971591		-0.9462	9.01264	-0.104986	0.916387
CYP2A7	0.563193	-0.828659	3.65734	-0.226574	0.820755		1.08509	3.591	0.302168	0.762524		0.852893	3.38531	0.251939	0.801088
CYP2B6	0.412192	2.4685	6.6519	0.371097	0.710566		1.33991	6.6729	0.200799	0.840855		-1.93305	6.55089	-0.295083	0.767931
CYP2B7P	0.232895	-1.81252	9.21997	-0.196586	0.844152		0	9.22474	0	1		-0.9462	9.01264	-0.104986	0.916387
CYP2C18	0.292407	-1.36153	6.76167	-0.20136	0.840417		-0.32851	6.76416	-0.0485663	0.961265		0.277864	6.60864	0.0420455	0.966462
CYP2C19	72.9297	-0.0952573	0.331962	-0.286953	0.774149	0.922357	0.335707	0.33578	0.999783	0.317416	0.522759	-0.265039	0.328513	-0.806783	0.419791	0.682907
CYP2C8	0.507241	-1.21854	3.81064	-0.319773	0.74914		-0.957646	3.81343	-0.251125	0.801718		-1.50075	3.70939	-0.40458	0.685786
CYP2C9	3.3947	-0.144243	0.937704	-0.153826	0.877747	0.965374	-0.744625	1.03295	-0.720871	0.470989	0.654736	-1.64387	1.07582	-1.52802	0.126507	0.356878
CYP2D6	11.5696	-0.757728	0.670849	-1.12951	0.258684	0.568321	-0.293097	0.643493	-0.455478	0.648765	0.786914	-0.161285	0.621638	-0.259452	0.795286	0.927387
CYP2E1	7.25329	1.93673	0.679929	2.84843	0.00439357	0.0533856	1.42856	0.68239	2.09347	0.0363071	0.138883	1.21387	0.678221	1.78979	0.073488	0.259475
CYP2F1	0.251575	0	9.22474	0	1		0	9.22474	0	1		-1.81193	9.01117	-0.201076	0.840639
CYP2W1	0.358368	0.133098	7.66321	0.0173685	0.986143		-1.61527	7.65957	-0.210882	0.832979		-2.82128	7.47509	-0.377424	0.705858
CYP39A1	3.52239	1.10767	0.84667	1.30827	0.190783	0.485326	-2.04113	1.11399	-1.83226	0.0669124	0.197466	-1.39048	0.971808	-1.43081	0.152484	0.401145
CYP3A4	0.5179	1.30678	4.82751	0.270693	0.786627		0	4.8599	0	1		2.3429	4.62809	0.506235	0.612691
CYP3A5	0.788316	1.23118	2.924	0.421061	0.673711		-1.30618	3.12369	-0.418154	0.675834		-2.98299	3.02218	-0.987032	0.323627
CYP3A7	0.0271355	0	9.22474	0	1		-0.649108	9.22474	-0.070366	0.943902		0	9.01264	0	1
CYP3A7-CYP3AP1	0.709955	-0.828652	2.75756	-0.300501	0.763795		-0.649096	2.75756	-0.235387	0.813908		0.668035	2.5601	0.26094	0.794138
CYP4A11	0.410302	1.33525	5.35479	0.249357	0.803085		1.10221	5.40208	0.204034	0.838327		-1.44891	5.30077	-0.273339	0.784592
CYP4A22	0.581181	-1.36786	4.00562	-0.341485	0.732739		0.948551	3.96095	0.239476	0.810737		0.598797	3.82895	0.156387	0.875728
CYP4B1	0.274865	-0.828576	9.22474	-0.0898211	0.928429		0	9.22474	0	1		-1.21576	9.01254	-0.134896	0.892694
CYP4F2	1.02111	0.774339	2.33632	0.331436	0.740315		2.16275	2.09306	1.0333	0.301464		2.63025	1.91274	1.37512	0.169094
CYP4F3	0.115161	-0.508062	9.22474	-0.0550761	0.956078		-0.649108	9.22474	-0.070366	0.943902		0	9.01264	0	1
CYP51A1	980.906	0.17202	0.25025	0.687393	0.491835	0.761381	0.316666	0.250226	1.26552	0.205684	0.407321	0.157327	0.244946	0.642291	0.520684	0.757011
CYP7A1	0.502473	-2.51061	5.96041	-0.421214	0.673599		-2.29473	5.95994	-0.385025	0.700219		-1.8195	5.83693	-0.311722	0.755252
CYR61	0.912992	-0.828656	2.52623	-0.328021	0.742896		-1.50084	2.5179	-0.596068	0.55113		1.7296	2.30351	0.750851	0.452742
CYTH1	2.4963	-0.459752	1.3452	-0.341773	0.732522	0.897717	-1.51904	1.53024	-0.992684	0.320864	0.525902	-0.71517	1.3088	-0.54643	0.58477	0.808567
CYTIP	0.533281	-0.490017	4.13507	-0.118503	0.905669		-0.975689	4.19136	-0.232786	0.815928		0.770953	4.04427	0.190628	0.848817
DAAM1	651.837	-0.575789	0.148717	-3.8717	0.000108079	0.00391787	-0.829205	0.148619	-5.57942	2.41325e-08	9.10572e-07	-0.505517	0.143186	-3.5305	0.000414781	0.00601433
DACH1	143.521	-0.211206	0.333534	-0.633235	0.52658	0.781893	-0.00237232	0.335009	-0.00708137	0.99435	0.997458	0.384899	0.325675	1.18185	0.237265	0.512417
DAD1	287.438	0.432065	0.559797	0.771824	0.440219	0.728119	1.12757	0.560307	2.01242	0.0441761	0.155289	0.132533	0.548125	0.241793	0.808941	0.930563
DAG1	81.8156	0.0423015	0.250071	0.169158	0.865673	0.961122	-0.215165	0.260348	-0.826451	0.408548	0.601505	-0.0474261	0.253931	-0.186768	0.851843	0.944321
DAPK1	388.786	0.0503771	0.229938	0.21909	0.82658	0.947713	-0.0244359	0.228917	-0.106746	0.914991	0.957214	0.297361	0.22237	1.33723	0.181147	0.445192
DAXX	1096.59	-0.0852759	0.184933	-0.461117	0.644715	0.860246	-0.359114	0.18487	-1.94253	0.0520733	0.171923	-0.190481	0.179924	-1.05868	0.289747	0.572018
DAZL	0.597947	-0.0635316	4.48214	-0.0141744	0.988691		-0.649104	4.61986	-0.140503	0.888263		1.77592	4.42399	0.401429	0.688104
DBF4	325.57	0.326712	0.221431	1.47545	0.14009	0.426746	0.522322	0.221309	2.36015	0.0182677	0.0906095	0.348729	0.214201	1.62805	0.103514	0.314008
DBH	1.97023	1.87837	1.06333	1.76649	0.077313	0.310462	-0.831099	1.13354	-0.733187	0.463444		-4.73334	1.43292	-3.30327	0.000955627	0.0115472
DBNDD2	119.179	-1.57878	0.570626	-2.76675	0.00566188	0.0605281	-1.94568	0.572434	-3.39895	0.000676439	0.00807523	-0.908682	0.55144	-1.64783	0.0993868	0.30335
DCC	4.71444	0.304286	0.936157	0.325037	0.745153	0.904918	-2.42429	1.1884	-2.03996	0.0413544	0.150141	-2.57437	1.20094	-2.14363	0.0320628	0.146198
DCK	177.226	-0.120288	0.274436	-0.438311	0.661161	0.866466	-0.0545346	0.273494	-0.1994	0.84195	0.914781	0.068529	0.263341	0.260229	0.794687	0.927387
DCN	0.958222	-1.72732	2.06556	-0.836246	0.403017		0.627683	1.90969	0.328684	0.742395		-3.33258	2.01376	-1.6549	0.0979449
DCP1B	6.99571	0.491615	0.729356	0.67404	0.500286	0.766283	1.13271	0.714134	1.58614	0.112708	0.277762	0.509822	0.73948	0.689434	0.49055	0.739825
DCTD	656.594	0.155376	0.131844	1.17849	0.238602	0.547425	0.228052	0.131815	1.7301	0.0836129	0.227673	0.353676	0.127884	2.7656	0.00568185	0.0456016
DCTN6	1375.9	0.431336	0.227008	1.90009	0.0574207	0.264038	0.397664	0.227305	1.74948	0.0802086	0.222124	0.0742153	0.222175	0.334039	0.73835	0.89967
DCUN1D4	57.7388	-0.458677	0.485723	-0.944318	0.345007	0.664182	0.432484	0.487192	0.887709	0.374698	0.565526	-0.324181	0.480698	-0.674397	0.500059	0.746614
DCX	41.381	0.0382688	0.351981	0.108724	0.913421	0.97108	-0.606112	0.364785	-1.66156	0.0966011	0.248772	-1.01778	0.361532	-2.81517	0.00487511	0.0404708
DDB2	12.4709	0.0281466	0.527532	0.0533552	0.957449	0.988818	0.909173	0.520085	1.74812	0.0804429	0.222481	2.11895	0.497236	4.26146	2.03099e-05	0.000464989
DDC	4.79748	0.0361526	0.860339	0.0420214	0.966482	0.989608	-5.57529	1.40368	-3.97191	7.12973e-05	0.00126598	-5.44519	1.39652	-3.89912	9.65444e-05	0.00181021
DDIAS	2.1695	0.318805	1.15448	0.276146	0.782436	0.924821	1.30058	1.2109	1.07406	0.282796		1.34289	1.14092	1.17702	0.239186	0.51406
DDIT3	168.792	1.3278	0.223923	5.92974	3.03412e-09	3.66623e-07	1.3143	0.223437	5.88219	4.04882e-09	1.90115e-07	1.19156	0.218183	5.46126	4.72757e-08	1.94009e-06
DDIT4	4.63071	-4.61482	1.62166	-2.84574	0.0044309	0.05354	0.874874	1.19154	0.734237	0.462804	0.647833	1.26974	1.13789	1.11587	0.264476	0.545431
DDR1	256.392	0.339094	0.274511	1.23527	0.216731	0.523185	-0.0483308	0.274791	-0.175882	0.860387	0.92566	0.44064	0.265208	1.66149	0.0966146	0.300041
DDR2	1.85279	0.643409	1.39652	0.460723	0.644997		-3.08475	1.77129	-1.74153	0.0815907		-0.00144799	1.5397	-0.000940435	0.99925
DDX10	121.262	-0.157192	0.218892	-0.718125	0.47268	0.750971	0.280715	0.212422	1.3215	0.186336	0.383377	0.537208	0.2032	2.64374	0.00819959	0.0575294
DDX3Y	0.320861	2.14867	9.17542	0.234177	0.814848		-1.57205	9.22205	-0.170466	0.864643		-2.33678	9.00716	-0.259436	0.795299
DDX42	10.1685	-2.47579	0.89349	-2.77092	0.00558974	0.0601865	0.089166	0.758818	0.117506	0.906459	0.951489	-0.655057	0.747577	-0.876241	0.380899	0.652857
DDX60	16.5934	-1.19456	0.481698	-2.4799	0.0131418	0.11011	-1.21866	0.508568	-2.39626	0.0165633	0.0851221	-1.66311	0.468562	-3.54938	0.000386133	0.00575232
DECR1	25.8957	-0.252975	0.504889	-0.501052	0.616335	0.842533	0.28031	0.518626	0.540486	0.588862	0.746858	-0.642504	0.521783	-1.23136	0.218187	0.490245
DEFA1B	0.273107	-0.296998	9.05677	-0.0327929	0.97384		-0.649032	9.05813	-0.0716519	0.942879		-1.21576	8.84976	-0.137378	0.890732
DEFA4	0.065817	0	9.22474	0	1		-0.328516	9.22474	-0.0356125	0.971591		-0.683896	9.01264	-0.0758819	0.939513
DEFA6	0.257173	-0.828654	9.22474	-0.0898296	0.928423		2.34037	9.18987	0.254669	0.798979		0	9.01264	0	1
DEFB1	0
DEFB118	0.210597	-2.53018	9.21404	-0.274601	0.783623		0	9.22474	0	1		-1.20258	9.01255	-0.133434	0.89385
DEFB4A	0.208872	0	9.22474	0	1		0.63322	9.22474	0.0686436	0.945273		2.24672	8.95902	0.250777	0.801986
DEK	739.467	0.0945584	0.216296	0.437171	0.661988	0.866466	0.310115	0.216303	1.43371	0.151655	0.336605	0.173431	0.210501	0.8239	0.409996	0.675051
DENND2D	1.9766	-1.06337	1.28087	-0.830191	0.406431	0.70517	-0.471267	1.54168	-0.305685	0.759845		0.770143	1.26635	0.608158	0.543082	0.77456
DENND3	9.51934	-1.78089	0.782848	-2.27489	0.0229125	0.151473	-2.1527	0.684259	-3.14602	0.00165506	0.0158242	-2.35834	0.665072	-3.546	0.000391126	0.00578708
DENND4B	1.137	0.646972	1.64835	0.392498	0.694691		0.906115	1.3256	0.683552	0.494258		-0.325972	1.49456	-0.218106	0.827347
DEPDC1	131.547	-0.597254	0.370151	-1.61354	0.106627	0.371199	0.135645	0.362819	0.373863	0.708506	0.826199	0.526979	0.348178	1.51353	0.130145	0.363196
DEPDC1B	258.656	-0.140226	0.197966	-0.708334	0.478738	0.754105	0.30932	0.198805	1.5559	0.119732	0.289799	0.499468	0.188185	2.65414	0.00795112	0.0563312
DEPTOR	0.493599	0.608409	5.31809	0.114404	0.908918		-0.0142257	5.43221	-0.00261877	0.997911		-2.26758	5.29941	-0.427894	0.668728
DERA	460.903	0.217483	0.378056	0.575268	0.56511	0.807565	0.739413	0.377942	1.95642	0.050416	0.169029	0.584004	0.369558	1.58028	0.114044	0.333763
DES	0.593786	-0.508056	2.94141	-0.172726	0.862867		-0.974896	2.94105	-0.331479	0.740283		-2.66059	2.84645	-0.934706	0.34994
DFFA	7.47599	0.122751	0.6833	0.179644	0.857432	0.956857	0.436134	0.679776	0.641585	0.521143	0.69365	0.268901	0.681663	0.394478	0.693228	0.870036
DFFB	291.494	-0.402805	0.349574	-1.15228	0.249208	0.558777	-1.1732	0.351719	-3.33562	0.000851109	0.00936664	-0.895461	0.340057	-2.63327	0.00845676	0.0589534
DHCR7	6.62866	-1.06134	0.658743	-1.61116	0.107145	0.371459	0.111603	0.609702	0.183045	0.854763	0.922899	0.227339	0.632626	0.359357	0.719328	0.888012
DHDDS	169.456	-0.020396	0.17472	-0.116735	0.90707	0.970848	0.0483507	0.171612	0.281745	0.778139	0.876443	0.594543	0.16371	3.63169	0.000281571	0.00450306
DHFR	40.8443	-0.241152	0.29422	-0.819632	0.412426	0.706818	0.0313974	0.294456	0.106629	0.915084	0.957214	0.162384	0.271177	0.598811	0.549299	0.777816
DHRS2	0.192568	0	9.22474	0	1		0.953812	9.22474	0.103397	0.917648		1.56132	8.96681	0.174122	0.861769
DHRS7	86.5821	-0.416193	0.429544	-0.968918	0.332586	0.650119	0.806361	0.426553	1.89041	0.0587031	0.183228	0.755008	0.420138	1.79705	0.0723276	0.256209
DHRS9	0.151614	0	9.22474	0	1		-0.9763	9.22462	-0.105836	0.915712		-2.30441	9.00751	-0.255832	0.79808
DHX15	628.13	0.506736	0.388743	1.30352	0.192396	0.48715	0.482637	0.389147	1.24024	0.214885	0.414797	0.220392	0.380658	0.578976	0.562606	0.790107
DHX29	33.0527	0.566309	0.378128	1.49766	0.134221	0.415774	0.171269	0.381696	0.448705	0.653645	0.789166	-0.0877119	0.368299	-0.238154	0.811762	0.930611
DLAT	688.406	0.175146	0.170273	1.02862	0.303659	0.625157	0.00647328	0.170137	0.0380474	0.96965	0.988684	0.305038	0.165728	1.8406	0.0656809	0.240498
DLD	2.00574	0.84274	1.13645	0.741556	0.458356	0.740108	-0.43024	1.32914	-0.323697	0.746168		0.258917	1.19461	0.216739	0.828412	0.937981
DLG4	110.197	-0.116658	0.322447	-0.361791	0.717508	0.891965	0.361623	0.319394	1.13222	0.257544	0.464821	0.883098	0.310725	2.84206	0.00448227	0.0380818
DLGAP5	25.3351	0.145913	0.510356	0.285903	0.774952	0.922562	1.21518	0.495017	2.45483	0.0140952	0.0770532	1.21504	0.490375	2.47778	0.0132204	0.0811269
DLL1	26.3309	-0.744034	0.613176	-1.21341	0.224974	0.531289	0.934058	0.589018	1.58579	0.112787	0.277762	1.1812	0.572453	2.06339	0.0390754	0.168978
DLL4	7.03212	-0.896435	0.779854	-1.14949	0.250353	0.559054	-1.31062	0.785324	-1.66889	0.0951392	0.24722	-2.25024	0.899428	-2.50185	0.0123546	0.0786399
DLX5	1.11732	-1.18699	1.94003	-0.611837	0.540645		0.325586	1.61214	0.201958	0.83995		1.14703	1.55946	0.735534	0.462014
DMRTA1	72.7556	0.0071369	0.365601	0.019521	0.984425	0.994543	-0.955554	0.37822	-2.52645	0.0115222	0.0678171	-0.664457	0.358245	-1.85475	0.0636313	0.236252
DMTF1	19.323	0.0625947	0.599322	0.104443	0.916818	0.97293	1.22969	0.603308	2.03825	0.0415249	0.150243	0.190675	0.580845	0.328271	0.742707	0.902955
DMTN	2.40724	-4.53819	1.52946	-2.96718	0.00300546	0.0419123	-2.75807	1.5401	-1.79084	0.0733186	0.210779	-0.577424	1.10024	-0.524819	0.599709	0.815739
DNA2	26.5588	0.804504	0.386603	2.08096	0.037438	0.204592	1.48	0.375264	3.9439	8.01671e-05	0.00138847	1.38173	0.354228	3.90068	9.59232e-05	0.00181021
DNAJA3	9.4734	-0.458526	0.603342	-0.759976	0.447269	0.733089	0.644097	0.568948	1.13209	0.257599	0.464821	0.828301	0.540759	1.53174	0.125587	0.354744
DNAJB1	3.39064	0.772399	1.11095	0.695262	0.486891	0.760221	1.57443	1.0344	1.52207	0.12799	0.300827	-1.1506	1.12691	-1.02102	0.307244	0.587084
DNAJB14	159.217	0.46521	0.26778	1.73728	0.0823376	0.325017	0.421861	0.269262	1.56673	0.117178	0.285579	0.622218	0.263775	2.3589	0.0183294	0.099916
DNAJB2	0.971724	-0.922727	3.15744	-0.292239	0.770104		-2.33158	3.30892	-0.704635	0.481038		-0.806487	3.15071	-0.25597	0.797974
DNAJB4	392.575	0.784257	0.349811	2.24194	0.0249651	0.162087	0.763949	0.349631	2.18501	0.028888	0.119687	0.621776	0.340724	1.82487	0.0680211	0.246166
DNAJB6	301.355	0.441755	0.312827	1.41214	0.157909	0.454302	0.731217	0.312014	2.34354	0.0191017	0.0929716	0.164223	0.303827	0.540513	0.588843	0.811246
DNAJB9	54.006	1.3331	0.471838	2.82533	0.00472316	0.0555291	0.895269	0.48085	1.86185	0.0626245	0.19097	0.814867	0.470726	1.73109	0.0834362	0.279621
DNAJC15	70.2124	0.3643	0.459612	0.792625	0.427996	0.718281	0.82454	0.46264	1.78225	0.0747089	0.213683	5.47322e-07	0.459293	1.19166e-06	0.999999	0.999999
DNM1	214.091	0.123912	0.235472	0.52623	0.598729	0.83083	-0.267494	0.237014	-1.1286	0.259066	0.465878	-0.113092	0.230935	-0.489714	0.624336	0.831556
DNM1L	174.795	0.462273	0.357459	1.29322	0.195935	0.490402	0.615972	0.358466	1.71836	0.0857316	0.230835	0.269238	0.351269	0.766474	0.443394	0.705473
DNMT1	7.40535	0.00813375	0.699935	0.0116207	0.990728	0.995254	0.119355	0.709522	0.168219	0.866411	0.928412	0.58377	0.653877	0.892783	0.371973	0.644338
DNMT3A	71.2883	-0.0329297	0.217002	-0.151748	0.879386	0.965374	-0.194261	0.216924	-0.895524	0.370507	0.56238	0.258206	0.203184	1.2708	0.203799	0.475604
DNTTIP2	508.842	0.0698554	0.169359	0.41247	0.679995	0.875659	-0.00514241	0.1688	-0.0304646	0.975697	0.990969	0.0822804	0.163236	0.504059	0.61422	0.827713
DOCK2	1.73206	-1.51762	1.54287	-0.983633	0.325296		-3.17271	1.80474	-1.75799	0.0787496		-0.756816	1.56997	-0.482058	0.629764
DPH2	5.59301	-1.80496	0.947212	-1.90555	0.0567084	0.263654	0.145142	0.911368	0.159258	0.873466	0.930704	-1.15016	0.971669	-1.18369	0.236535	0.511903
DPM2	165.338	0.241661	0.178073	1.35709	0.174753	0.473572	0.471991	0.178562	2.64329	0.00821035	0.0531163	0.565865	0.173567	3.26022	0.00111326	0.0130179
DPP10	76.3095	-0.01439	0.454995	-0.0316267	0.97477	0.993498	0.324334	0.452879	0.716161	0.473892	0.656172	0.751461	0.439097	1.71138	0.0870113	0.286773
DPPA5	0.622706	-0.82865	4.19522	-0.197522	0.843419		-2.5735	4.16576	-0.617774	0.536724		2.23008	3.95386	0.564027	0.572736
DPY30	323.417	0.507969	0.56349	0.901468	0.367339	0.680362	0.939216	0.564012	1.66524	0.0958646	0.248238	0.327432	0.551667	0.593532	0.552825	0.780775
DPYS	1.50997	-1.57249	1.84059	-0.854341	0.392916		-0.388652	1.5927	-0.24402	0.807215		0.227981	1.4309	0.159328	0.873411
DRAP1	43.0371	0.244594	0.485757	0.503532	0.61459	0.841511	0.861542	0.487582	1.76697	0.0772331	0.218465	-0.0949175	0.492088	-0.192887	0.847047	0.942646
DRD2	164.613	-0.787676	0.242121	-3.25323	0.00114101	0.0206807	-1.66449	0.247687	-6.72014	1.8155e-11	1.27872e-09	-1.36377	0.239078	-5.70431	1.16818e-08	5.9088e-07
DSC3	2.88746	1.98991	1.3263	1.50035	0.133525	0.415475	-0.330518	1.13922	-0.290127	0.771719	0.872002	1.83987	0.950832	1.93501	0.0529892	0.210695
DSG2	12.2465	-1.24145	0.743465	-1.66982	0.0949549	0.353038	-1.03194	0.763261	-1.35201	0.176372	0.370451	-0.139392	0.715994	-0.194683	0.845641	0.942646
DSG3	3.01986	-0.853718	1.21006	-0.705519	0.480487	0.754105	0.365274	1.18407	0.308491	0.757709	0.863712	-1.39331	1.26898	-1.09797	0.272216	0.551249
DSP	0.247048	-1.43121	9.2225	-0.155187	0.876674		-0.649108	9.22474	-0.070366	0.943902		-1.50384	9.01221	-0.166867	0.867475
DTL	57.7322	0.0061647	0.312539	0.0197246	0.984263	0.994543	0.849558	0.300119	2.83073	0.00464413	0.0351722	1.06229	0.290481	3.65701	0.000255171	0.00414177
DTX3L	0.173905	-0.828654	9.22474	-0.0898296	0.928423		-0.9763	9.22462	-0.105836	0.915712		1.70457	8.97664	0.18989	0.849396
DUSP1	637.255	-0.104028	0.156186	-0.666051	0.505378	0.767539	0.215974	0.154763	1.39552	0.16286	0.351865	0.38923	0.149908	2.59646	0.00941893	0.0642199
DUSP11	79.2182	-0.190512	0.48273	-0.394656	0.693097	0.883638	0.213401	0.484003	0.440909	0.659279	0.793015	0.436628	0.472884	0.923331	0.355835	0.628199
DUSP14	89.2009	0.0701225	0.202849	0.345688	0.729577	0.897717	0.156254	0.199846	0.78187	0.434291	0.622871	0.717379	0.184908	3.87965	0.000104606	0.00189599
DUSP22	265.043	-0.212305	0.156473	-1.35681	0.17484	0.473572	-0.423041	0.155619	-2.71843	0.00655922	0.0454414	0.0277398	0.146144	0.189812	0.849457	0.943338
DUSP3	374.58	-0.502744	0.200779	-2.50397	0.0122808	0.104999	-0.655307	0.201593	-3.25064	0.00115148	0.0120449	-0.59615	0.193729	-3.07723	0.00208932	0.0212349
DUSP4	65.92	-0.170019	0.303783	-0.559672	0.575703	0.813605	1.59866	0.282478	5.65942	1.51885e-08	6.2928e-07	1.51473	0.274618	5.51577	3.47256e-08	1.51668e-06
DUSP6	4.41481	-0.100593	0.821488	-0.122452	0.902541	0.969875	1.35258	0.706387	1.91479	0.0555199	0.176854	1.54305	0.723528	2.13268	0.0329513	0.149
DYNLL1	1309.28	0.358085	0.55047	0.650507	0.515365	0.77465	0.690601	0.550597	1.25428	0.209742	0.410736	-0.135706	0.53795	-0.252266	0.800836	0.928345
DYNLT3	99.2417	-2.13117	0.248837	-8.56451	1.0854e-17	5.90186e-15	-1.48645	0.228805	-6.49658	8.21662e-11	5.02229e-09	-0.752295	0.200423	-3.75353	0.000174362	0.00303505
DYRK3	94.8434	-1.43731	0.262102	-5.48377	4.16361e-08	3.62234e-06	-1.21925	0.254473	-4.79126	1.65737e-06	4.48976e-05	-0.637587	0.235073	-2.71229	0.00668202	0.0502886
E2F1	11.8736	0.481029	0.571949	0.841034	0.400329	0.704618	0.234286	0.584126	0.401088	0.688355	0.810887	0.63889	0.546635	1.16877	0.242497	0.517596
E2F2	0.558981	-3.36723	4.93546	-0.682253	0.495079		-0.238033	4.92837	-0.0482985	0.961478		-0.946209	4.853	-0.194974	0.845413
E2F7	18.1296	0.353525	0.376936	0.937892	0.3483	0.667419	1.38714	0.354522	3.91271	9.12668e-05	0.00156786	1.81257	0.341806	5.30292	1.13967e-07	4.34875e-06
E2F8	10.4815	-0.963354	0.560183	-1.71971	0.0854848	0.331944	-0.124188	0.52269	-0.237594	0.812196	0.895408	1.21716	0.480655	2.53229	0.0113319	0.073573
EAPP	46.2782	0.0905033	0.560165	0.161565	0.871648	0.964311	0.762132	0.563347	1.35286	0.176099	0.370246	0.238185	0.554868	0.429263	0.667732	0.860037
EBF1	174.925	0.124536	0.272386	0.457204	0.647525	0.861178	0.0453009	0.272116	0.166477	0.867782	0.928417	0.651271	0.263551	2.47114	0.0134684	0.0819576
EBF3	168.195	-0.10468	0.231543	-0.452099	0.651198	0.86263	-0.180478	0.232511	-0.776211	0.437624	0.625643	-0.249561	0.229075	-1.08943	0.275966	0.555764
EBNA1BP2	1184.67	-0.207687	0.0745289	-2.78666	0.0053255	0.0582058	-0.348948	0.0750367	-4.65036	3.31363e-06	8.53867e-05	-0.0240809	0.0716857	-0.335923	0.736929	0.899563
EBP	138.817	0.0817723	0.412454	0.198258	0.842843	0.953871	0.43433	0.413761	1.04971	0.29385	0.501135	0.0705181	0.405343	0.173971	0.861888	0.94842
ECD	398.446	0.00615709	0.16079	0.0382927	0.969454	0.989936	0.189187	0.159234	1.18811	0.234792	0.439429	0.501081	0.153371	3.26711	0.0010865	0.0127737
ECH1	42.5264	0.03807	0.302213	0.125971	0.899755	0.967838	-0.226358	0.312479	-0.724395	0.468823	0.652624	0.182387	0.302378	0.603177	0.546391	0.776225
ECI1	4331.09	-0.381053	0.320371	-1.18941	0.234278	0.543851	-0.35866	0.320364	-1.11954	0.26291	0.469366	-0.143655	0.312818	-0.459228	0.64607	0.847687
ECSCR	1.00748	-1.16655	2.63119	-0.443354	0.65751		-0.974553	2.65588	-0.366942	0.713663		0.16839	2.30511	0.0730507	0.941766
EDEM1	11.2443	0.766862	0.550864	1.39211	0.16389	0.461698	1.11763	0.560433	1.99423	0.0461272	0.160542	0.630064	0.569531	1.10629	0.268603	0.548146
EDN1	0.57792	-2.24835	3.56558	-0.630572	0.528321		-0.0163688	3.5379	-0.00462669	0.996308		0.409049	3.42473	0.11944	0.904927
EDN3	0.123015	0	9.22474	0	1		-0.649108	9.22474	-0.070366	0.943902		-0.9462	9.01264	-0.104986	0.916387
EDNRA	0.13649	1.59652	9.20899	0.173365	0.862364		-0.649108	9.22474	-0.070366	0.943902		0.540143	9.01264	0.0599317	0.95221
EDNRB	0.216662	0	9.22474	0	1		0	9.22474	0	1		-1.88445	9.0107	-0.209134	0.834343
EEA1	23.1834	-0.407383	0.431067	-0.945056	0.34463	0.664182	0.55665	0.425629	1.30783	0.190931	0.388668	0.159176	0.408147	0.389998	0.696538	0.872678
EED	34.6153	-0.0433996	0.399365	-0.108672	0.913463	0.97108	1.22861	0.390046	3.14991	0.00163323	0.0157336	0.838635	0.37846	2.21591	0.0266974	0.129325
EEF1A2	0.890678	-0.24142	2.14678	-0.112457	0.910461		-1.97734	2.2407	-0.882464	0.377526		-0.995064	2.20882	-0.450497	0.652352
EEF1B2	1490.1	0.442531	0.439672	1.0065	0.314174	0.637432	0.513473	0.439905	1.16724	0.243115	0.448257	-0.0679831	0.429984	-0.158106	0.874373	0.953264
EEF1G	46.9274	-0.74219	0.390325	-1.90147	0.0572407	0.263793	-0.498265	0.395071	-1.2612	0.207236	0.408769	-1.12615	0.400298	-2.81328	0.00490394	0.0405554
EEF2	12732.1	-0.25825	0.259945	-0.993481	0.320476	0.64421	-0.339408	0.259918	-1.30583	0.191611	0.389302	0.247949	0.253918	0.976495	0.328819	0.606436
EEF2K	24.4997	-1.57695	0.460237	-3.42637	0.000611698	0.0138588	-0.344814	0.404299	-0.852869	0.393732	0.585061	-0.506017	0.39178	-1.29158	0.196501	0.466546
[truncated: 2,396 more rows]

## Sheet: 3. Col_time
Probe_ID	baseMean	log2FC.Col_4h	lfcSE.Col_4h	stat.Col_4h	pval.Col_4h	FDR.Col_4h	log2FC.Col_16h	lfcSE.Col_16h	stat.Col_16h	pval.Col_16h	FDR.Col_16h	log2FC.Col_24h	lfcSE.Col_24h	stat.Col_24h	pval.Col_24h	FDR.Col_24h
[truncated: 3,255 more rows]

[truncated: 12 more sheets: 4. DES_time, 5. MPP_time, 6. Rot_time, 7. Val_time, 8. Ber_conc, 9. Car_conc, 10. Col_conc, 11. DES_conc, 12. MPP_conc, 13. Rot_conc, 14. Val_conc, 15. Metabolomics]
